# Supplementary material for: Transcriptional Changes Involved in Atrophying Muscles during Prolonged Fasting in Rats
Source: Int J Mol Sci. 2020 Aug 20;21(17):5984. doi: 10.3390/ijms21175984 (PMC7503389; doi:10.3390/ijms21175984)
Supplement: Supplementary file 1 [file ijms-21-05984-s001.zip › Table S1.xlsx]

## Sheet: All_Data
Transcriptional changes involved in atrophying muscles during prolonged fasting in rats
Marianne Ibrahim1,2, Thierry Wasselin1,2,a, Etienne Challet3, Alain Van Dorsselaer1,2, Yvon Le Maho1,4,5, Thierry Raclot1,4, Fabrice Bertile*1,2
1 Université de Strasbourg, CNRS, IPHC UMR 7178, F-67000 Strasbourg, France.
2 Laboratoire de Spectrométrie de Masse Bio-Organique, 25 rue Becquerel, F-67087 Strasbourg, France.
3 Institute of Cellular and Integrative Neurosciences, CNRS, Université de Strasbourg, F-67000 Strasbourg, France.
4 Département Ecologie, Physiologie, Ethologie, 23 rue Becquerel, F-67087 Strasbourg, France.
4 Centre Scientifique de Monaco, 8 quai Antoine 1er, 98000 Monaco, Monaco.
a Present address: Department of Clinical Chemistry, University Medical Center, Göttingen, Germany
* Correspondence to: Fabrice Bertile, Université de Strasbourg, CNRS, IPHC UMR 7178, F-67087 Strasbourg, France, e-mail : fbertile@unistra.fr, phone: +33 368 852 681, fax: +33 368 852 781.
Table S1. List of the 26535 probes used to compare transcripts expression levels in tibialis anterior muscle of fed and fasted rats
The 2886 probes indicating differentially (p<0.001) expressed transcripts in tibialis anterior muscle of fed and fasted rats are highlighted in blue (columns X-AA; Statistics)
Probeset IDs, names and annotations									Quantification												Statistics						Transcripts illustrated in Figures and/or discussed in the discussion section
Probe Set ID	Gene Symbol	GeneAccession	UniProt accession number	Protein Name	Description	Gene Symbol	Gene Id	Gene Descr	Mean Intensity (log2) Fed state	sem Intensity (log2) Fed state	Mean Intensity (log2) Phase 2 of fasting	sem Intensity (log2) phase 2 of fasting	Mean Intensity (log2) Phase 3 of fasting	sem Intensity (log(2) Phase 3 of fasting	Fold Change P2 vs Fed	Fold Change P2 vs Fed Mean for probes targeting the same transcript	Fold Change P3vsFed	Fold Change P3 vs Fed Mean for probes targeting the same transcripts	Fold Change P3 vsP2	Fold Change P3 vs P2 Mean for probes targeting the same transcripts	Shapiro-Wilk Normality test	Bartlett test of homogeneity of variances	ANOVA	post hoc Tukey HSD test
																					p-value	p-value	p-value	adjusted p-value (P2 vs Fed)	adjusted p-value (P3vsFed)	adjusted p-value (P3 vsP2)	Figure 1	Figure 2	Figure 3	Figure 4
10701620	Vom2r4	NM_001099458	D3ZEA4	D3ZEA4_RAT	D3ZEA4_RAT Protein Vom2r4 OS=Rattus norvegicus (Rat) GN=Vom2r4 PE=4 SV=3	Vom2r4	308248	Protein Vom2r4	3.63172	0.120387	3.93688	0.139957	4.01763	0.178897	1.23556	1.11801	1.30669	1.14408	1.05757	1.0193	0.614914	0.877827	0.232862	0.3782	0.236	0.9195
10701630	---	ENSRNOT00000043839	---	---	---	---	---	---	2.56488	0.0441327	2.6226	0.0335859	2.62057	0.00667071	1.04082		1.03935		0.998595		0.0460801	0.111497	0.410069	0.4532	0.4911	0.9969
10701632	---	ENSRNOT00000043877	---	---	---	---	---	---	2.8148	0.0524213	2.94109	0.0875557	2.92051	0.102813	1.09148		1.07602		0.985834		0.0984949	0.71351	0.533518	0.5495	0.6436	0.9844
10701636	---	ENSRNOT00000046204	---	---	---	---	---	---	3.53383	0.1665	3.45882	0.0949673	3.44955	0.00774967	0.949332		0.943252		0.993596		0.03335	0.0293396	0.839652	0.8808	0.8511	0.9978
10701643	---	ENSRNOT00000044213	---	---	---	---	---	---	2.53907	0.0545791	2.77032	0.147441	2.53916	0.0141848	1.17385		1.00006		0.851946		0.0373036	0.0504517	0.197554	0.2489	1	0.2489
10701648	Vom2r5	NM_001099462	D3ZH81	D3ZH81_RAT	D3ZH81_RAT Protein LOC100909608 OS=Rattus norvegicus (Rat) GN=Vom2r5 PE=4 SV=1	Vom2r5	679691	Protein LOC100909608	3.37816	0.154961	3.31025	0.115649	3.20287	0.0849824	0.954021	1.01754	0.885589	1.02985	0.92827	1.00952	0.266525	0.760343	0.607686	0.9288	0.5882	0.7944
10701654	Vom2r6	NM_001099459	D4A685	D4A685_RAT	D4A685_RAT Protein Vom2r6 OS=Rattus norvegicus (Rat) GN=Vom2r6 PE=4 SV=2	Vom2r6	308257	Protein Vom2r6	2.93689	0.122086	3.07722	0.0099777	3.04255	0.016432	1.10216	1.10216	1.07598	1.07598	0.976249	0.976249	1.48501e-05	0.00706971	0.412311	0.4103	0.5773	0.9432
10701663	---	ENSRNOT00000044523	M0RAB1	M0RAB1_RAT	M0RAB1_RAT Uncharacterized protein OS=Rattus norvegicus (Rat) PE=4 SV=2	---	---	Uncharacterized protein	5.49672	0.103692	5.90302	0.248146	6.48679	0.202138	1.32529	1.32529	1.98628	1.98628	1.49875	1.49875	0.700981	0.575951	0.0311386	0.3703	0.0266	0.1636
10701666	---	ENSRNOT00000052842	---	---	---	---	---	---	3.92155	0.0396292	4.76244	0.308012	5.25544	0.181623	1.79116		2.52081		1.40736		0.177947	0.104403	0.0108274	0.065	0.0093	0.2838
10701668	Vom2r1	NM_001099461	M0R4Y3	M0R4Y3_RAT	M0R4Y3_RAT Protein Vom2r1 OS=Rattus norvegicus (Rat) GN=Vom2r1 PE=4 SV=2	Vom2r1	678740	Protein Vom2r1	4.3411	0.235496	5.0258	0.137632	4.84435	0.141043	1.60737	1.42524	1.4174	1.38856	0.881814	0.980712	0.492015	0.713768	0.0781183	0.0759	0.1889	0.7633
10701671	Vom2r5	NM_001099462	D3ZH81	D3ZH81_RAT	D3ZH81_RAT Protein LOC100909608 OS=Rattus norvegicus (Rat) GN=Vom2r5 PE=4 SV=1	Vom2r5	679691	Protein LOC100909608	3.06032	0.0474933	3.12177	0.073269	3.17664	0.0481528	1.04351	1.01754	1.08396	1.02985	1.03877	1.00952	0.376085	0.78003	0.437534	0.7779	0.4078	0.7779
10701674	Vom2r5	NM_001099462	D3ZH81	D3ZH81_RAT	D3ZH81_RAT Protein LOC100909608 OS=Rattus norvegicus (Rat) GN=Vom2r5 PE=4 SV=1	Vom2r5	679691	Protein LOC100909608	3.33578	0.0527133	3.41316	0.0229749	3.49928	0.0464257	1.0551	1.01754	1.12	1.02985	1.06152	1.00952	0.845699	0.603909	0.0899862	0.4575	0.0775	0.3803
10701679	---	ENSRNOT00000062042	---	---	---	---	---	---	3.00297	0.00863997	3.22099	0.172476	2.99331	0.0146273	1.16313		0.993327		0.854009		0.000587058	0.00218102	0.252127	0.3274	0.995	0.2922
10701684	---	ENSRNOT00000042737	---	---	---	---	---	---	5.30752	0.19689	5.73299	0.130524	5.46414	0.00927219	1.34301		1.11467		0.829984		0.433906	0.0120581	0.164534	0.1499	0.7125	0.4024
10701689	---	ENSRNOT00000053783	---	---	---	---	---	---	5.90388	0.0840643	6.55842	0.22417	7.02643	0.123003	1.57412		2.17731		1.38319		0.301441	0.461743	0.00620824	0.0551	0.0051	0.1595
10701691	---	ENSRNOT00000062037	---	---	---	---	---	---	5.19867	0.0175297	5.27153	0.0837853	5.15996	0.0211787	1.0518		0.973526		0.925582		0.000978533	0.0798264	0.341091	0.5668	0.8694	0.325
10701697	---	ENSRNOT00000028945	---	---	---	---	---	---	6.78794	0.0973636	7.31993	0.507684	6.21197	0.103062	1.44592		0.670832		0.463949		0.29719	0.0611988	0.107185	0.4805	0.4238	0.0929
10701699	Lrp11	NM_001106217	F1M753	F1M753_RAT	F1M753_RAT Low density lipoprotein receptor-related protein 11 (Predicted), isoform CRA_a OS=Rattus norvegicus (Rat) GN=Lrp11 PE=4 SV=2	Lrp11	292462	Low density lipoprotein receptor-related protein 11 (Predicted), isoform CRA_a	6.63669	0.0270472	7.05686	0.375989	5.98578	0.0866785	1.33809	1.33809	0.63688	0.63688	0.475962	0.475962	0.600013	0.0149886	0.0383064	0.4292	0.1756	0.0331
10701709	Lats1	ENSRNOT00000020098	F1M2K4	F1M2K4_RAT	F1M2K4_RAT Protein Lats1 OS=Rattus norvegicus (Rat) GN=Lats1 PE=1 SV=2	Lats1	308265	Protein Lats1	8.53849	0.0391805	8.69293	0.200567	9.00937	0.0451595	1.11299	1.11299	1.38596	1.38596	1.24525	1.24525	0.453211	0.0764178	0.0817655	0.6591	0.0749	0.2351
10701714	---	ENSRNOT00000033768	---	---	---	---	---	---	4.6057	0.0202131	4.73921	0.0822478	4.54822	0.0430924	1.09696		0.960942		0.876001		0.078089	0.288166	0.110902	0.2747	0.7323	0.1036
10701717	Katna1	NM_001004217	Q6E0V2	KTNA1_RAT	KTNA1_RAT Katanin p60 ATPase-containing subunit A1 OS=Rattus norvegicus (Rat) GN=Katna1 PE=1 SV=1	Katna1	292464	Katanin p60 ATPase-containing subunit A1	7.30785	0.0183877	7.28535	0.0104134	7.39894	0.0971401	0.984527	0.984527	1.06518	1.06518	1.08192	1.08192	6.99921e-05	0.0275724	0.382265	0.954	0.531	0.3871
10701730	---	ENSRNOT00000062003	---	---	---	---	---	---	5.26156	0.0886993	5.22858	0	5.24379	0.0228964	0.977404		0.98776		1.0106		0.335309	0	0.919952	0.9126	0.9719	0.9819
10701732	---	ENSRNOT00000062002	---	---	---	---	---	---	5.38783	0.0403116	5.30078	0.0420318	5.13271	0.035432	0.941444		0.837917		0.890033		0.946697	0.981452	0.0103414	0.3219	0.0091	0.0554
10701734	Ppil4	NM_001108457	D4AEG3	D4AEG3_RAT	D4AEG3_RAT Protein Ppil4 OS=Rattus norvegicus (Rat) GN=Ppil4 PE=1 SV=3	Ppil4	361449	Protein Ppil4	7.30181	0.0290128	7.63091	0.0585929	8.08537	0.0140525	1.25623	1.25623	1.72137	1.72137	1.37027	1.37027	0.153969	0.216159	2.23753e-05	0.0024	0	0.0004
10701748	Zc3h12d	NM_001107469	D4A0I4	D4A0I4_RAT	D4A0I4_RAT Protein Zc3h12d OS=Rattus norvegicus (Rat) GN=Zc3h12d PE=4 SV=1	Zc3h12d	308266	Protein Zc3h12d	5.63603	0.0784692	5.42397	0.0795349	5.41351	0.0364242	0.863304	0.863304	0.857069	0.857069	0.992778	0.992778	0.607287	0.584835	0.0981886	0.146	0.1223	0.9895
10701753	---	XR_005690	---	---	---	---	---	---	4.16295	0.037147	4.10488	0.02093	4.06182	0.117631	0.960544		0.932299		0.970595		0.00924003	0.107535	0.632684	0.8379	0.6089	0.9107
10701756	---	ENSRNOT00000061953	---	---	---	---	---	---	6.18049	0.0451277	6.09058	0.000342	5.96999	0.0438689	0.939585		0.864236		0.919806		0.378804	0	0.0164402	0.2595	0.0138	0.1137
10701758	Shprh	NM_001107470	D4A9B2	D4A9B2_RAT	D4A9B2_RAT Protein Shprh OS=Rattus norvegicus (Rat) GN=Shprh PE=1 SV=1	Shprh	308282	Protein Shprh	7.85576	0.0885196	7.85174	0.229237	8.1395	0.0641389	0.997219	0.997219	1.21734	1.21734	1.22074	1.22074	0.197491	0.242146	0.34303	1	0.4037	0.4037
10701788	Fbxo30	NM_001007690	Q5XI67	FBX30_RAT	FBX30_RAT F-box only protein 30 OS=Rattus norvegicus (Rat) GN=Fbxo30 PE=1 SV=1	Fbxo30	308283	F-box only protein 30	8.15149	0.102737	8.51304	0.245682	10.552	0.143941	1.28481	1.28481	5.27981	5.27981	4.10942	4.10942	0.0362361	0.526694	0.000146686	0.3793	0.0002	0.0004
10701792	Epm2a	AF347030	Q91XQ2	EPM2A_RAT	EPM2A_RAT Laforin OS=Rattus norvegicus (Rat) GN=Epm2a PE=2 SV=2	Epm2a	114005	Laforin	8.6484	0.0639712	8.67238	0.309065	8.09977	0.171491	1.01676	1.01676	0.683673	0.683673	0.672403	0.672403	0.892595	0.208106	0.168447	0.9943	0.2308	0.2032
10701795	---	XR_008697	---	---	---	---	---	---	5.29097	0.022091	5.10014	0.0945167	5.37808	0.107472	0.876098		1.06224		1.21247		0.241545	0.225392	0.131102	0.3091	0.7513	0.1226
10701797	Sf3b5	NM_001126092	D4A5T1	D4A5T1_RAT	D4A5T1_RAT Protein Sf3b5 OS=Rattus norvegicus (Rat) GN=Sf3b5 PE=1 SV=1	Sf3b5	680891	Protein Sf3b5	6.72896	0.15921	6.70273	0.0548121	6.94142	0.127463	0.981978	0.981978	1.15866	1.15866	1.17993	1.17993	0.586638	0.452687	0.37289	0.9869	0.4753	0.4012
10701799	---	XR_005908	---	---	---	---	---	---	6.60015	0.0813032	6.48762	0.062467	6.547	0.195853	0.924964		0.963831		1.04202		0.88719	0.300525	0.819881	0.8041	0.9485	0.9425
10701802	Plagl1	NM_012760	P70616	P70616_RAT	P70616_RAT Lost on transformation OS=Rattus norvegicus (Rat) GN=Plagl1 PE=2 SV=1	Plagl1	25157	Lost on transformation	6.91295	0.0185682	6.93323	0.0216317	6.88846	0.123209	1.01416	1.01416	0.983165	0.983165	0.969442	0.969442	0.0962173	0.0457074	0.902168	0.9792	0.9635	0.8936
10701817	Fuca2	NM_001004218	Q6AYS4	FUCO2_RAT	FUCO2_RAT Plasma alpha-L-fucosidase OS=Rattus norvegicus (Rat) GN=Fuca2 PE=2 SV=1	Fuca2	292485	Plasma alpha-L-fucosidase	8.67667	0.04194	8.58437	0.0555408	8.49417	0.0399507	0.93803	0.93803	0.881178	0.881178	0.939393	0.939393	0.565028	0.878357	0.0815205	0.4103	0.0699	0.3874
10701825	Adat2	NM_001115028	B0BMY9	B0BMY9_RAT	B0BMY9_RAT Deadc1 protein OS=Rattus norvegicus (Rat) GN=Adat2 PE=2 SV=1	Adat2	361453	Deadc1 protein	6.44242	0.0696377	6.56283	0.0496896	6.55064	0.0560866	1.08704	1.08704	1.0779	1.0779	0.99159	0.99159	0.728079	0.928071	0.366299	0.3937	0.4701	0.9858
10701830	Hivep2	NM_024137	Q00900	ZEP2_RAT	ZEP2_RAT Human immunodeficiency virus type I enhancer-binding protein 2 homolog OS=Rattus norvegicus (Rat) GN=Hivep2 PE=1 SV=2	Hivep2	29721	Human immunodeficiency virus type I enhancer-binding protein 2 homolog	8.99642	0.0743629	8.97767	0.0841137	8.90944	0.0476282	0.987085	0.987085	0.941495	0.941495	0.953814	0.953814	0.0462174	0.764786	0.681981	0.9841	0.6862	0.7815
10701839	Nmbr	NM_012799	P24053	NMBR_RAT	NMBR_RAT Neuromedin-B receptor OS=Rattus norvegicus (Rat) GN=Nmbr PE=2 SV=1	Nmbr	25264	Neuromedin-B receptor	4.95537	0.0157263	4.99675	0.0141259	4.955	0.0276163	1.02909	1.02909	0.99974	0.99974	0.971477	0.971477	0.194597	0.552501	0.321941	0.3591	0.9928	0.4093
10701844	---	ENSRNOT00000053074	---	---	---	---	---	---	3.04958	0.0326231	3.08784	0.0579334	3.08653	0.0275547	1.02688		1.02594		0.99909		0.472346	0.570399	0.776313	0.81	0.81	1
10701846	Cited2	NM_053698	Q99MA1	Q99MA1_RAT	Q99MA1_RAT Cbp/p300-interacting transactivator, with Glu/Asp-rich carboxy-terminal domain, 2 OS=Rattus norvegicus (Rat) GN=Cited2 PE=2 SV=1	Cited2	114490	Cbp/p300-interacting transactivator, with Glu/Asp-rich carboxy-terminal domain, 2	8.89279	0.139068	10.0336	0.0540389	9.99672	0.212785	2.20499	2.20499	2.14941	2.14941	0.974791	0.974791	0.128598	0.291241	0.00253148	0.0039	0.0046	0.9835
10701853	---	ENSRNOT00000016553	---	---	---	---	---	---	11.7481	0.0192549	12.0427	0.0487095	11.6342	0.0504726	1.22653		0.924076		0.753408		0.433444	0.54301	0.00106605	0.0058	0.1813	0.001
10701862	---	U15425	Q62700	Q62700_RAT	Q62700_RAT P58 OS=Rattus norvegicus (Rat) PE=2 SV=1	---	---	P58	6.28836	0.120225	6.3729	0.0789017	6.10642	0.0424853	1.06035	1.0651	0.881517	0.94723	0.831345	0.888793	0.324802	0.473162	0.166789	0.7853	0.3607	0.1568
10701865	---	ENSRNOT00000044049	---	---	---	---	---	---	4.0241	0.0630779	3.97074	0.0118023	4.05328	0.133767	0.963689		1.02043		1.05888		0.00453358	0.0372487	0.789136	0.899	0.9665	0.7761
10701880	Reps1	NM_001106264	A0A0G2KB70	A0A0G2KB70_RAT	A0A0G2KB70_RAT Protein Reps1 OS=Rattus norvegicus (Rat) GN=Reps1 PE=1 SV=1	Reps1	292944	Protein Reps1	7.09514	0.0474152	7.57171	0.0535911	7.61214	0.138383	1.39143	1.39143	1.43097	1.43097	1.02842	1.02842	0.793196	0.301676	0.0116763	0.0218	0.0158	0.9558
10701902	---	XR_008811	---	---	---	---	---	---	6.10518	0.0698517	6.42914	0.101874	6.66175	0.105397	1.25176		1.47076		1.17495		0.831673	0.838068	0.0167315	0.1136	0.014	0.2655
10701913	Perp	NM_001106265	B2GVC0	B2GVC0_RAT	B2GVC0_RAT PERP, TP53 apoptosis effector OS=Rattus norvegicus (Rat) GN=Perp PE=1 SV=1	Perp	292949	PERP, TP53 apoptosis effector	4.85194	0.183459	4.83439	0.0590608	4.69876	0.0878437	0.987908	0.987908	0.899261	0.899261	0.910268	0.910268	0.240141	0.34039	0.663407	0.995	0.6853	0.7389
10701917	---	ENSRNOT00000041472	---	---	---	---	---	---	4.46826	0.0525897	4.40349	0.202469	4.49703	0.0721778	0.956103		1.02014		1.06698		0.994626	0.189929	0.874584	0.9361	0.9852	0.8681
10701920	Olig3	NM_001106269	D4A572	D4A572_RAT	D4A572_RAT Protein Olig3 OS=Rattus norvegicus (Rat) GN=Olig3 PE=4 SV=1	Olig3	293012	Protein Olig3	4.87029	0.050546	4.8412	0.0214543	4.79609	0.0936333	0.980037	0.980037	0.949865	0.949865	0.969213	0.969213	0.379595	0.214587	0.715449	0.9381	0.6957	0.8765
10701922	---	XR_006177	---	---	---	---	---	---	4.81323	0.0885167	4.77228	0.0440975	4.59356	0.110899	0.972018		0.858759		0.883481		0.112913	0.566066	0.24791	0.9526	0.2602	0.3712
10701924	Ifngr1	NM_053783	Q9QZ62	Q9QZ62_RAT	Q9QZ62_RAT Interferon-gamma receptor OS=Rattus norvegicus (Rat) GN=Ifngr1 PE=2 SV=1	Ifngr1	116465	Interferon-gamma receptor	8.39647	0.0226886	9.16892	0.182545	9.14044	0.05387	1.70817	1.70817	1.67478	1.67478	0.980453	0.980453	0.239023	0.0551925	0.00399785	0.0061	0.0072	0.984
10701934	Il22ra2	NM_001003404	Q7TNI4	I22R2_RAT	I22R2_RAT Interleukin-22 receptor subunit alpha-2 OS=Rattus norvegicus (Rat) GN=Il22ra2 PE=2 SV=1	Il22ra2	444986	Interleukin-22 receptor subunit alpha-2	4.75202	0.0800391	4.81372	0.0573787	4.7529	0.0110573	1.0437	1.0437	1.00061	1.00061	0.958718	0.958718	0.104673	0.0990879	0.699837	0.7543	0.9991	0.7316
10701942	Il20ra	NM_001107521	D3ZJZ2	D3ZJZ2_RAT	D3ZJZ2_RAT Interleukin 20 receptor, alpha (Predicted) OS=Rattus norvegicus (Rat) GN=Il20ra PE=4 SV=1	Il20ra	308716	Interleukin 20 receptor, alpha (Predicted)	4.46392	0.0684724	4.29617	0.041568	4.39598	0.0298833	0.890229	0.890229	0.953996	0.953996	1.07163	1.07163	0.493939	0.560388	0.124621	0.1112	0.6293	0.3642
10701949	Map3k5	ENSRNOT00000051496	D3ZZH6	D3ZZH6_RAT	D3ZZH6_RAT Protein Map3k5 OS=Rattus norvegicus (Rat) GN=Map3k5 PE=1 SV=3	Map3k5	365057	Protein Map3k5	7.29306	0.0934656	7.19079	0.262619	6.97402	0.0873395	0.931567	0.931567	0.801603	0.801603	0.860489	0.860489	0.742254	0.266793	0.443186	0.9036	0.4264	0.656
10701968	Map7	NM_001106270	A0A0G2KB52	A0A0G2KB52_RAT	A0A0G2KB52_RAT Protein Map7 OS=Rattus norvegicus (Rat) GN=Map7 PE=1 SV=1	Map7	293016	Protein Map7	6.58946	0.2039	7.13212	0.013432	7.64303	0.104105	1.45665	1.45665	2.07565	2.07565	1.42495	1.42495	0.816447	0.040049	0.00408598	0.0647	0.0033	0.074
10701986	---	ENSRNOT00000038363	---	---	---	---	---	---	5.38767	0.0936681	5.57666	0.011191	5.73263	0.100843	1.13997		1.27012		1.11417		0.249522	0.0647274	0.0593096	0.2828	0.0507	0.4143
10701988	---	ENSRNOT00000053205	---	---	---	---	---	---	5.86939	0.0992165	6.01052	0.0895619	5.92445	0.0659236	1.10277		1.0389		0.942084		0.60206	0.871827	0.51646	0.4907	0.8764	0.7644
10701990	Bclaf1	BC161968	B1WC16	B1WC16_RAT	B1WC16_RAT BCL2-associated transcription factor 1, isoform CRA_a OS=Rattus norvegicus (Rat) GN=Bclaf1 PE=1 SV=1	Bclaf1	293017	BCL2-associated transcription factor 1, isoform CRA_a	6.78178	0.0418193	7.08918	0.137934	7.3992	0.0118493	1.23748	1.23748	1.53413	1.53413	1.23972	1.23972	0.0684542	0.0298664	0.00586331	0.0886	0.0047	0.0886
10702023	---	ENSRNOT00000052725	---	---	---	---	---	---	3.54228	0.0282274	3.48958	0.0565917	3.62012	0.100751	0.964133		1.05544		1.0947		0.0538819	0.329797	0.467172	0.8833	0.7043	0.4447
10702025	Ahi1	NM_001002277	Q6DTM3	AHI1_RAT	AHI1_RAT Jouberin OS=Rattus norvegicus (Rat) GN=Ahi1 PE=1 SV=1	Ahi1	308923	Jouberin	7.86708	0.0550581	7.8161	0.22674	8.09544	0.0667852	0.965283	0.965283	1.1715	1.1715	1.21364	1.21364	0.123554	0.135424	0.381127	0.9657	0.5154	0.3923
10702049	Hbs1l	NM_001011934	Q6AXM7	HBS1L_RAT	HBS1L_RAT HBS1-like protein OS=Rattus norvegicus (Rat) GN=Hbs1l PE=1 SV=1	Hbs1l	293408	HBS1-like protein	10.6669	0.0778148	10.4121	0.0984966	10.4845	0.0594279	0.838119	0.838119	0.881244	0.881244	1.05145	1.05145	0.677059	0.790497	0.15039	0.1435	0.3209	0.8011
10702068	Aldh8a1	ENSRNOT00000020015	D3ZXY4	D3ZXY4_RAT	D3ZXY4_RAT Protein Aldh8a1 OS=Rattus norvegicus (Rat) GN=Aldh8a1 PE=1 SV=2	Aldh8a1	685750	Protein Aldh8a1	4.60591	0.0121671	4.58626	0.00608159	4.61974	0.0124166	0.986475	0.986475	1.00963	1.00963	1.02348	1.02348	0.33083	0.738861	0.152053	0.4148	0.6545	0.1362
10702076	---	ENSRNOT00000053093	---	---	---	---	---	---	4.38919	0.102578	4.2745	0.042074	4.1846	0.0330844	0.923581		0.867784		0.939586		0.347524	0.321397	0.184594	0.5112	0.1643	0.6277
10702078	---	AY383688	Q6TXG6	Q6TXG6_RAT	Q6TXG6_RAT LRRGT00033 OS=Rattus norvegicus (Rat) PE=2 SV=1	---	---	LRRGT00033	4.2528	0.0871757	4.35492	0.118223	4.1066	0.18973	1.07335	1.07335	0.903625	0.903625	0.841877	0.841877	0.255451	0.596162	0.491047	0.8607	0.7542	0.4643
10702087	---	XR_005729	---	---	---	---	---	---	7.1064	0.0444255	7.14539	0.16837	7.15832	0.150604	1.0274		1.03664		1.009		0.880779	0.320411	0.958336	0.9759	0.9576	0.9973
10702089	---	XR_006306	---	---	---	---	---	---	4.92904	0.0805582	4.77576	0.0184829	4.61352	0.129728	0.899202		0.803556		0.893633		0.163337	0.122493	0.116416	0.4747	0.1011	0.4615
10702092	---	ENSRNOT00000061512	---	---	---	---	---	---	5.21171	0.0969147	5.331	0.068541	5.30973	0.0890691	1.0862		1.07031		0.985368		0.0717938	0.913785	0.618908	0.6295	0.7222	0.9854
10702096	Lama2	ENSRNOT00000014917	F1M614	F1M614_RAT	F1M614_RAT Protein Lama2 OS=Rattus norvegicus (Rat) GN=Lama2 PE=1 SV=3	Lama2	309368	Protein Lama2	9.73342	0.0736733	9.87365	0.187537	9.99771	0.10341	1.10208	1.10208	1.20104	1.20104	1.08979	1.08979	0.818687	0.474734	0.414216	0.7488	0.3848	0.7786
10702161	---	ENSRNOT00000053846	---	---	---	---	---	---	6.08254	0.417991	6.54054	0.181913	6.83672	0.0392227	1.37364		1.68667		1.22789		0.0149537	0.046954	0.206459	0.4821	0.1876	0.7187
10702163	---	XR_008943	---	---	---	---	---	---	9.8852	0.0441184	9.93758	0.122386	9.74252	0.0408764	1.03698		0.905839		0.873536		0.762137	0.278376	0.258796	0.8954	0.4329	0.2546
10702165	L3mbtl3	NM_001107612	D3ZJT9	D3ZJT9_RAT	D3ZJT9_RAT Protein L3mbtl3 OS=Rattus norvegicus (Rat) GN=L3mbtl3 PE=1 SV=1	L3mbtl3	309550	Protein L3mbtl3	6.96234	0.0244584	6.99414	0.193599	6.94432	0.162203	1.02229	1.02229	0.987588	0.987588	0.966057	0.966057	0.466766	0.104092	0.974398	0.9885	0.9964	0.9726
10702187	---	ENSRNOT00000044222	---	---	---	---	---	---	12.3365	0.068602	12.3147	0.129526	12.0743	0.0670489	0.985005		0.833792		0.846485		0.696017	0.597089	0.160276	0.9824	0.186	0.2331
10702189	Tmem200a	NM_001109135	D3Z9K1	D3Z9K1_RAT	D3Z9K1_RAT Protein Tmem200a OS=Rattus norvegicus (Rat) GN=Tmem200a PE=4 SV=1	Tmem200a	498987	Protein Tmem200a	6.33932	0.0786745	6.31213	0.10494	6.10687	0.0773024	0.981325	1.03809	0.851185	0.980201	0.867383	0.94025	0.592403	0.911193	0.204887	0.9685	0.2248	0.3023
10702192	---	ENSRNOT00000062861	---	---	---	---	---	---	6.07094	0.126039	6.18742	0.0774252	6.31727	0.06576	1.08409		1.18619		1.09418		0.44596	0.698249	0.255694	0.6722	0.2307	0.6153
10702194	Tmem200a	NM_001109135	D3Z9K1	D3Z9K1_RAT	D3Z9K1_RAT Protein Tmem200a OS=Rattus norvegicus (Rat) GN=Tmem200a PE=4 SV=1	Tmem200a	498987	Protein Tmem200a	4.38668	0.0884002	4.51742	0.0487896	4.53622	0.0724202	1.09486	1.03809	1.10922	0.980201	1.01312	0.94025	0.885766	0.731027	0.328098	0.4386	0.3509	0.9789
10702196	---	ENSRNOT00000016434	---	---	---	---	---	---	10.4691	0.118051	10.303	0.146937	10.197	0.0586804	0.891226		0.828096		0.929165		0.843399	0.538766	0.317009	0.6008	0.2936	0.7959
10702199	---	ENSRNOT00000051215	---	---	---	---	---	---	6.80416	0.0389542	6.65539	0.103828	6.36622	0.0767609	0.902018		0.73819		0.818377		0.48842	0.488488	0.0197671	0.432	0.0176	0.087
10702201	Akap7	NM_001001801	Q6JP77	AKA7G_RAT	AKA7G_RAT A-kinase anchor protein 7 isoforms delta and gamma OS=Rattus norvegicus (Rat) GN=Akap7 PE=1 SV=1	Akap7	361458	A-kinase anchor protein 7 isoforms delta and gamma	6.53243	0.0791391	6.77988	0.081507	6.69612	0.008766	1.18711	1.18711	1.12015	1.12015	0.943594	0.943594	0.489895	0.0454694	0.0918755	0.0846	0.2512	0.6835
10702214	Arg1	NM_017134	P07824	ARGI1_RAT	ARGI1_RAT Arginase-1 OS=Rattus norvegicus (Rat) GN=Arg1 PE=1 SV=2	Arg1	29221	Arginase-1	5.05945	0.0659313	5.00369	0.0119333	4.95446	0.0390553	0.962084	0.962084	0.929814	0.929814	0.966457	0.966457	0.00385113	0.194319	0.329686	0.6909	0.3017	0.7208
10702224	Enpp3	NM_019370	P97675	ENPP3_RAT	ENPP3_RAT Ectonucleotide pyrophosphatase/phosphodiesterase family member 3 OS=Rattus norvegicus (Rat) GN=Enpp3 PE=1 SV=2	Enpp3	54410	Ectonucleotide pyrophosphatase/phosphodiesterase family member 3	8.01762	0.119855	8.2561	0.290203	8.37582	0.204442	1.17975	1.17975	1.28182	1.28182	1.08652	1.08652	0.912434	0.569795	0.52876	0.7332	0.5097	0.9161
10702250	Enpp1	NM_053535	Q924C3	ENPP1_RAT	ENPP1_RAT Ectonucleotide pyrophosphatase/phosphodiesterase family member 1 OS=Rattus norvegicus (Rat) GN=Enpp1 PE=1 SV=2	Enpp1	85496	Ectonucleotide pyrophosphatase/phosphodiesterase family member 1	8.07908	0.0531638	8.4777	0.333626	8.45357	0.151936	1.31825	1.31825	1.29638	1.29638	0.983411	0.983411	0.629432	0.116025	0.391528	0.4349	0.4726	0.9967
10702276	Taar9	NM_175602	Q923Y6	TAAR9_RAT	TAAR9_RAT Trace amine-associated receptor 9 OS=Rattus norvegicus (Rat) GN=Taar9 PE=3 SV=1	Taar9	319107	Trace amine-associated receptor 9	4.85303	0.0883535	4.78881	0.00725382	4.83452	0.100212	0.956461	0.956461	0.98725	0.98725	1.03219	1.03219	0.278827	0.0349513	0.812562	0.8025	0.975	0.905
10702278	Taar8c	NM_175600	Q923Y0	TAA8C_RAT	TAA8C_RAT Trace amine-associated receptor 8c OS=Rattus norvegicus (Rat) GN=Taar8c PE=3 SV=1	Taar8c	319105	Trace amine-associated receptor 8c	3.52059	0.0682372	3.65291	0.0217945	3.72584	0.0388008	1.09605	1.09605	1.15288	1.15288	1.05185	1.05185	0.283022	0.328892	0.0587921	0.1974	0.0529	0.5809
10702280	Taar8b	NM_175601	Q923Y3	TAA8B_RAT	TAA8B_RAT Trace amine-associated receptor 8b OS=Rattus norvegicus (Rat) GN=Taar8b PE=3 SV=1	Taar8b	319106	Trace amine-associated receptor 8b	3.63004	0	3.64816	0.0310374	3.65624	0.0261983	1.01264	1.01264	1.01833	1.01833	1.00562	1.00562	0.000395471	0	0.717305	0.8232	0.7137	0.978
10702282	Taar7a	NM_175585	Q923Y2	TAA7A_RAT	TAA7A_RAT Trace amine-associated receptor 7a OS=Rattus norvegicus (Rat) GN=Taar7a PE=3 SV=1	Taar7a	294125	Trace amine-associated receptor 7a	3.53978	0.0494176	3.59759	0.0216913	3.80715	0.0546111	1.04088	1.04088	1.20361	1.20361	1.15633	1.15633	0.300176	0.564715	0.0123634	0.6918	0.0131	0.0344
10702284	Taar6	NM_175584	Q923Y5	TAAR6_RAT	TAAR6_RAT Trace amine-associated receptor 6 OS=Rattus norvegicus (Rat) GN=Taar6 PE=3 SV=1	Taar6	294124	Trace amine-associated receptor 6	5.02798	0.00967153	5.02662	0.012605	5.01813	0.0825761	0.999056	0.999056	0.9932	0.9932	0.994138	0.994138	0.0648386	0.0280484	0.988883	0.9987	0.9882	0.9947
10702286	Rps12	NM_031709	Q6PDW1	Q6PDW1_RAT	Q6PDW1_RAT 40S ribosomal protein S12 OS=Rattus norvegicus (Rat) GN=Rps12 PE=1 SV=1	Rps12	65139	40S ribosomal protein S12	8.89372	0.0397365	9.19672	0.0811204	9.62188	0.0268829	1.2337	1.2461	1.65653	1.77352	1.34273	1.40525	0.222069	0.376522	0.00023162	0.0175	0.0002	0.0034		IGF-1/insulin/GH signaling & ribosome proteins and biogenesis
10702293	---	ENSRNOT00000053476	---	---	---	---	---	---	6.29272	0.181072	6.92268	0.0703007	7.42547	0.0320391	1.54752		2.19276		1.41695		0.272406	0.124541	0.00115904	0.0172	0.0009	0.0449
10702295	Eya4	ENSRNOT00000022362	F1LX86	F1LX86_RAT	F1LX86_RAT Eyes absent homolog OS=Rattus norvegicus (Rat) GN=Eya4 PE=3 SV=3	Eya4	292172	Eyes absent homolog	8.46722	0.0285987	8.73485	0.106732	8.64004	0.0841685	1.20382	1.20382	1.12726	1.12726	0.9364	0.9364	0.263586	0.301194	0.133985	0.1224	0.3422	0.7025
10702306	Tcf21	NM_001032397	Q498R2	Q498R2_RAT	Q498R2_RAT Protein Tcf21 OS=Rattus norvegicus (Rat) GN=Tcf21 PE=2 SV=1	Tcf21	252856	Protein Tcf21	5.23408	0.001759	5.19348	0.0567141	5.21106	0.0689395	0.97225	0.97225	0.984166	0.984166	1.01226	1.01226	0.12567	0.0209584	0.865072	0.8539	0.9468	0.9724
10702309	Tbpl1	NM_001127201	D4A898	D4A898_RAT	D4A898_RAT Protein Tbpl1 OS=Rattus norvegicus (Rat) GN=Tbpl1 PE=4 SV=1	Tbpl1	689030	Protein Tbpl1	8.67023	0.0589939	8.80482	0.0492865	9.28387	0.0425612	1.09778	1.09778	1.53011	1.53011	1.39382	1.39382	0.164729	0.874453	0.000333097	0.2175	0.0003	0.0014
10702317	---	ENSRNOT00000015702	---	---	---	---	---	---	3.76494	0.202943	3.56682	0.0732723	3.75349	0.0526566	0.871685		0.992093		1.13813		0.293311	0.203948	0.499825	0.5438	0.9983	0.574
10702320	Clvs2	NM_001108459	A6JUQ6	CLVS2_RAT	CLVS2_RAT Clavesin-2 OS=Rattus norvegicus (Rat) GN=Clvs2 PE=1 SV=1	Clvs2	361459	Clavesin-2	3.24353	0.0730064	3.13873	0.0414344	3.18129	0.0384105	0.929932	0.929932	0.957775	0.957775	1.02994	1.02994	0.458849	0.677019	0.434564	0.4102	0.6927	0.859
10702327	---	XR_006576	---	---	---	---	---	---	3.98454	0.0388381	3.87399	0.043404	4.07021	0.0781919	0.926238		1.06118		1.14569		0.757257	0.565506	0.127073	0.4172	0.5641	0.1116
10702330	---	ENSRNOT00000050911	---	---	---	---	---	---	3.082	0.0208495	3.08488	0.0400415	3.13845	0.112998	1.002		1.0399		1.03783		0.0347932	0.117058	0.824875	0.9994	0.8444	0.8605
10702340	---	ENSRNOT00000052652	---	---	---	---	---	---	2.58611	0.0380694	2.57791	0.0324221	2.6581	0.0412858	0.994327		1.05116		1.05716		0.0830103	0.964429	0.33833	0.9813	0.4466	0.3626
10702342	Rnf217	NM_001106204	D4ABK2	D4ABK2_RAT	D4ABK2_RAT Protein Rnf217 OS=Rattus norvegicus (Rat) GN=Rnf217 PE=4 SV=2	Rnf217	292188	Protein Rnf217	9.25512	0.0599309	8.93275	0.190395	8.35148	0.043162	0.799752	0.799752	0.534534	0.534534	0.668375	0.668375	0.100355	0.148786	0.00465934	0.2138	0.004	0.0305
10702352	Tpd52l1	NM_001044295	Q499Q2	Q499Q2_RAT	Q499Q2_RAT Protein Tpd52l1 OS=Rattus norvegicus (Rat) GN=Tpd52l1 PE=2 SV=1	Tpd52l1	689256	Protein Tpd52l1	6.07532	0.187445	7.2544	0.191404	7.58338	0.603208	2.26433	2.26433	2.84428	2.84428	1.25613	1.25613	0.600577	0.21354	0.06877	0.1519	0.0703	0.8223
10702361	Hey2	ENSRNOT00000018718	G3V7S6	G3V7S6_RAT	G3V7S6_RAT Hairy/enhancer-of-split related with YRPW motif 2 OS=Rattus norvegicus (Rat) GN=Hey2 PE=4 SV=1	Hey2	155430	Hairy/enhancer-of-split related with YRPW motif 2	4.51368	0.0942152	4.26346	0.0688306	4.33446	0.01749	0.840771	0.840771	0.883184	0.883184	1.05045	1.05045	0.13722	0.171654	0.093976	0.0899	0.2265	0.7569
10702367	Ncoa7	ENSRNOT00000018849	F1LWN1	F1LWN1_RAT	F1LWN1_RAT Protein Ncoa7 OS=Rattus norvegicus (Rat) GN=Ncoa7 PE=1 SV=3	Ncoa7	498995	Protein Ncoa7	5.38216	0.0434795	5.6632	0.149697	5.9587	0.155472	1.21507	1.21507	1.49127	1.49127	1.22731	1.22731	0.487658	0.319741	0.0502455	0.3407	0.0424	0.2919
10702383	Hint3	ENSRNOT00000019047	F1M9G8	F1M9G8_RAT	F1M9G8_RAT Histidine triad nucleotide-binding protein 3 OS=Rattus norvegicus (Rat) GN=Hint3 PE=1 SV=1	Hint3	246769	Histidine triad nucleotide-binding protein 3	9.26808	0.165408	9.69251	0.131386	9.27256	0.0777378	1.34204	1.34204	1.00311	1.00311	0.74745	0.74745	0.932699	0.64013	0.100355	0.1342	0.9998	0.1373
10702389	Trmt11	NM_198051	Q7TNK6	TRM11_RAT	TRM11_RAT tRNA (guanine(10)-N2)-methyltransferase homolog OS=Rattus norvegicus (Rat) GN=Trmt11 PE=2 SV=1	Trmt11	378794	tRNA (guanine(10)-N2)-methyltransferase homolog	6.43772	0.0911136	6.93104	0.108705	7.24212	0.0777708	1.40768	1.40768	1.74642	1.74642	1.24063	1.24063	0.721916	0.90602	0.00267444	0.0231	0.0022	0.1261
10702405	---	XR_006633	---	---	---	---	---	---	10.2306	0.137316	9.67595	0.219596	9.34049	0.208428	0.680822		0.539576		0.792536		0.930831	0.831824	0.0443506	0.1841	0.0388	0.4752
10702408	Cenpw	BC129114	A1L1L1	CENPW_RAT	CENPW_RAT Centromere protein W OS=Rattus norvegicus (Rat) GN=Cenpw PE=3 SV=1	Cenpw	689399	Centromere protein W	6.52318	0.0824487	6.31974	0.0578451	6.33247	0.0485307	0.868478	0.868478	0.876175	0.876175	1.00886	1.00886	0.325693	0.755712	0.120438	0.1466	0.1763	0.9884
10702412	Rspo3	NM_001100990	A7LKE6	A7LKE6_RAT	A7LKE6_RAT Protein Rspo3 OS=Rattus norvegicus (Rat) GN=Rspo3 PE=2 SV=1	Rspo3	498997	Protein Rspo3	5.44182	0.0128425	5.53805	0.120878	5.85624	0.143004	1.06898	1.06898	1.33276	1.33276	1.24677	1.24677	0.531742	0.0505439	0.0821829	0.8127	0.0823	0.1822
10702418	---	ENSRNOT00000061073	---	---	---	---	---	---	5.17991	0.0579382	5.13976	0	5.06128	0.0972641	0.972557		0.921067		0.947058		0.0384859	0	0.490412	0.9056	0.471	0.7054
10702424	Rnf146	NM_001012060	A0A140TAB2	A0A140TAB2_RAT	E3 ubiquitin-protein ligase RNF146	Rnf146	---	---	7.44815	0.0246223	7.86637	0.0504013	8.41029	0.0096668	1.33628	1.33628	1.9482	1.9482	1.45793	1.45793	0.111959	0.144759	2.42169e-06	0.0003	0	0.0001
10702428	---	XR_006687	---	---	---	---	---	---	7.61247	0.0166515	7.68531	0.140608	7.68961	0.0664275	1.05178		1.05492		1.00299		0.0148041	0.081279	0.787263	0.8265	0.8131	0.9996
10702430	---	ENSRNOT00000061051	---	---	---	---	---	---	3.68673	0.004737	3.67934	0.0738462	3.65541	0.0666058	0.994891		0.978524		0.983549		0.113062	0.0187676	0.925971	0.9962	0.926	0.9543
10702432	RGD1311933	ENSRNOT00000016989	F1M171	F1M171_RAT	F1M171_RAT Protein RGD1311933 OS=Rattus norvegicus (Rat) GN=RGD1311933 PE=4 SV=3	RGD1311933	308056	Protein RGD1311933	3.91251	0.0521336	4.15654	0.079967	4.14624	0.0582714	1.18429	1.18429	1.17587	1.17587	0.992887	0.992887	0.703043	0.851543	0.0612533	0.0792	0.0953	0.9884
10702439	---	XR_007772	---	---	---	---	---	---	3.0597	0.100791	3.22619	0.250904	3.13822	0.0348273	1.12232		1.05594		0.940847		0.033359	0.0845422	0.76433	0.7453	0.9373	0.915
10702441	---	ENSRNOT00000061044	---	---	---	---	---	---	4.80745	0.0297663	4.83179	0.0368403	4.59359	0.0608603	1.01701		0.862227		0.847802		0.370665	0.611892	0.016475	0.9283	0.0322	0.0209
10702446	---	ENSRNOT00000048292	---	---	---	---	---	---	4.39477	0.221277	4.16734	0.072904	4.01818	0.0381102	0.854157		0.770254		0.901771		0.0986038	0.103885	0.217619	0.4883	0.1987	0.7375
10702450	Lrrc14b	NM_001109333	D3ZJ80	D3ZJ80_RAT	D3ZJ80_RAT Protein Lrrc14b OS=Rattus norvegicus (Rat) GN=Lrrc14b PE=4 SV=1	Lrrc14b	502225	Protein Lrrc14b	9.76174	0.103752	9.87375	0.00349562	10.0708	0.0429131	1.08073	1.08073	1.23888	1.23888	1.14633	1.14633	0.77867	0.00844339	0.0421821	0.5023	0.0373	0.1654
10702453	Exoc3	NM_001024964	Q62825	EXOC3_RAT	EXOC3_RAT Exocyst complex component 3 OS=Rattus norvegicus (Rat) GN=Exoc3 PE=1 SV=1	Exoc3	252881	Exocyst complex component 3	8.5963	0.0195925	8.4763	0.00452627	9.08058	0.098424	0.920191	0.920191	1.39889	1.39889	1.52021	1.52021	0.0406446	0.0122988	0.000721228	0.3886	0.0025	0.0008
10702467	Sdha	NM_130428	Q920L2	SDHA_RAT	SDHA_RAT Succinate dehydrogenase [ubiquinone] flavoprotein subunit, mitochondrial OS=Rattus norvegicus (Rat) GN=Sdha PE=1 SV=1	Sdha	157074	Succinate dehydrogenase [ubiquinone] flavoprotein subunit, mitochondrial	11.8155	0.0414727	11.3383	0.0947522	10.9392	0.0617533	0.718377	0.718377	0.544763	0.544763	0.758324	0.758324	0.454579	0.598646	0.000372014	0.0074	0.0003	0.0163			Oxidative phosphorylation & TCA cycle
10702485	Pdcd6	NM_001107452	G3V7W1	G3V7W1_RAT	G3V7W1_RAT Programmed cell death 6 (Predicted), isoform CRA_a OS=Rattus norvegicus (Rat) GN=Pdcd6 PE=1 SV=1	Pdcd6	308061	Programmed cell death 6 (Predicted), isoform CRA_a	7.20432	0.0305308	7.49058	0.112541	8.60121	0.0863626	1.21947	1.21947	2.63333	2.63333	2.1594	2.1594	0.0317706	0.337187	4.4754e-05	0.1014	0	0.0002
10702492	Ahrr	NM_001024285	Q75NT5	AHRR_RAT	AHRR_RAT Aryl hydrocarbon receptor repressor OS=Rattus norvegicus (Rat) GN=Ahrr PE=2 SV=1	Ahrr	498999	Aryl hydrocarbon receptor repressor	4.74772	0.0641964	4.69832	0.0740989	4.66566	0.0116859	0.966337	0.966337	0.944707	0.944707	0.977616	0.977616	0.097647	0.147391	0.583692	0.7926	0.5611	0.9112
10702505	Cep72	ENSRNOT00000020780	D3ZVQ1	D3ZVQ1_RAT	D3ZVQ1_RAT Protein Cep72 OS=Rattus norvegicus (Rat) GN=Cep72 PE=4 SV=1	Cep72	308064	Protein Cep72	3.8329	0.0212163	3.85412	3.14018e-16	3.80818	0.0459363	1.01481	1.01481	0.983011	0.983011	0.968661	0.968661	3.13488e-05	0	0.569395	0.8679	0.8259	0.5418
10702519	Trip13	NM_001011930	Q5XHZ9	PCH2_RAT	PCH2_RAT Pachytene checkpoint protein 2 homolog OS=Rattus norvegicus (Rat) GN=Trip13 PE=2 SV=1	Trip13	292206	Pachytene checkpoint protein 2 homolog	4.06355	0.148032	4.05168	0.0647096	4.05162	0.0127768	0.991811	0.991811	0.991765	0.991765	0.999954	0.999954	0.703306	0.0549703	0.994484	0.9944	0.9968	0.9996
10702535	Nkd2	NM_001107454	D4A182	D4A182_RAT	D4A182_RAT Naked cuticle 2 homolog (Drosophila) (Predicted) OS=Rattus norvegicus (Rat) GN=Nkd2 PE=4 SV=1	Nkd2	308068	Naked cuticle 2 homolog (Drosophila) (Predicted)	5.98205	0.005727	5.96714	0.0470097	5.84612	0.11361	0.989715	0.989715	0.910077	0.910077	0.919534	0.919534	0.0200679	0.00748143	0.385563	0.9847	0.411	0.4926
10702546	Slc6a19	NM_001039722	Q2A865	S6A19_RAT	S6A19_RAT Sodium-dependent neutral amino acid transporter B(0)AT1 OS=Rattus norvegicus (Rat) GN=Slc6a19 PE=1 SV=2	Slc6a19	664630	Sodium-dependent neutral amino acid transporter B(0)AT1	5.00092	0.0382993	5.05738	0.0630232	5.03922	0	1.03991	1.03991	1.0269	1.0269	0.987494	0.987494	0.0242344	0	0.642821	0.632	0.7885	0.9582
10702562	Slc6a18	NM_017163	Q62687	S6A18_RAT	S6A18_RAT Sodium-dependent neutral amino acid transporter B(0)AT3 OS=Rattus norvegicus (Rat) GN=Slc6a18 PE=2 SV=1	Slc6a18	29323	Sodium-dependent neutral amino acid transporter B(0)AT3	4.64373	0.0960622	4.5455	0.0472089	4.48792	0.100155	0.93418	0.93418	0.897625	0.897625	0.96087	0.96087	0.873383	0.640532	0.47372	0.7099	0.4511	0.8849
10702579	---	ENSRNOT00000060826	---	---	---	---	---	---	3.95603	0.0115517	4.07292	0.0566878	3.96758	0	1.0844		1.00804		0.929582		0.000887531	0	0.102579	0.1182	0.9601	0.1673
10702588	---	ENSRNOT00000056954	---	---	---	---	---	---	3.96211	0.0280826	3.84658	0.0527664	4.08885	0.079307	0.923042		1.09182		1.18285		0.713051	0.421554	0.0649522	0.3844	0.3333	0.0553
10702590	---	XR_008474	---	---	---	---	---	---	3.44729	0.074927	3.36441	0.0435778	3.69462	0.0577246	0.944172		1.18701		1.2572		0.818634	0.778716	0.0182861	0.6066	0.0583	0.0179
10702592	Cd99l2	ENSRNOT00000031807	Q8R1R5	C99L2_RAT	C99L2_RAT CD99 antigen-like protein 2 OS=Rattus norvegicus (Rat) GN=Cd99l2 PE=2 SV=1	Cd99l2	171485	CD99 antigen-like protein 2	7.20121	0.100774	7.19066	0.0688694	6.77999	0.083924	0.992716	0.992716	0.746794	0.804109	0.752274	0.83511	0.578357	0.896883	0.0215252	0.9963	0.0312	0.0344
10702596	---	ENSRNOT00000056954	---	---	---	---	---	---	8.05148	0.0419362	7.86442	0.0138933	8.17337	0.0699612	0.878392		1.08816		1.23881		0.404373	0.190647	0.0103175	0.0703	0.2435	0.0087
10702598	Ppp1r14c	NM_133425	Q8R4R9	PP14C_RAT	PP14C_RAT Protein phosphatase 1 regulatory subunit 14C OS=Rattus norvegicus (Rat) GN=Ppp1r14c PE=1 SV=1	Ppp1r14c	171010	Protein phosphatase 1 regulatory subunit 14C	5.24141	0.0291212	4.75787	0.0456341	6.17084	0.252526	0.715221	0.715221	1.90453	1.90453	2.66285	2.66285	0.286468	0.0238047	0.00144768	0.1277	0.0105	0.0013
10702605	Iyd	NM_001025000	Q5BK17	IYD1_RAT	IYD1_RAT Iodotyrosine deiodinase 1 OS=Rattus norvegicus (Rat) GN=Iyd PE=2 SV=1	Iyd	308129	Iodotyrosine deiodinase 1	4.87064	0.063689	4.77197	0.0705413	4.85408	0.0115663	0.933896	0.933896	0.988588	0.988588	1.05856	1.05856	0.0810314	0.183213	0.453118	0.4741	0.984	0.5644
10702611	Plekhg1	ENSRNOT00000021471	D4AE81	D4AE81_RAT	D4AE81_RAT Protein Plekhg1 OS=Rattus norvegicus (Rat) GN=Plekhg1 PE=1 SV=2	Plekhg1	679812	Protein Plekhg1	6.93802	0.0242867	7.07343	0.177989	7.14096	0.218932	1.0984	1.0984	1.15104	1.15104	1.04792	1.04792	0.00775427	0.0865211	0.687037	0.8369	0.6713	0.9511
10702626	Mthfd1l	NM_001108462	B2GUZ3	B2GUZ3_RAT	B2GUZ3_RAT Mthfd1l protein OS=Rattus norvegicus (Rat) GN=Mthfd1l PE=1 SV=1	Mthfd1l	361472	Mthfd1l protein	5.77073	0.0698934	6.05655	0.129101	7.44721	0.163123	1.2191	1.2191	3.19647	3.19647	2.62198	2.62198	0.0346747	0.596819	0.000181365	0.3166	0.0002	0.0006
10702654	---	ENSRNOT00000053178	---	---	---	---	---	---	3.18447	0.0588928	3.26851	0.0111157	3.3555	0.0476756	1.05998		1.12586		1.06215		0.382804	0.151468	0.0938234	0.4253	0.0808	0.4253
10702656	---	ENSRNOT00000047908	---	---	---	---	---	---	5.35487	0.0341005	5.57141	0.0575963	5.62103	0.0572236	1.16194		1.2026		1.03499		0.332753	0.734975	0.0239953	0.0586	0.0258	0.784
10702660	Akap12	NM_057103	Q5QD51	AKA12_RAT	AKA12_RAT A-kinase anchor protein 12 OS=Rattus norvegicus (Rat) GN=Akap12 PE=1 SV=1	Akap12	83425	A-kinase anchor protein 12	7.78645	0.166538	7.34238	0.119631	6.92999	0.100665	0.735057	0.735057	0.552306	0.552306	0.751378	0.751378	0.667576	0.793704	0.0108834	0.1197	0.0089	0.1469
10702670	Armt1	BC078920	Q6AYT5	ARMT1_RAT	ARMT1_RAT Protein-glutamate O-methyltransferase OS=Rattus norvegicus (Rat) GN=Armt1 PE=1 SV=1	Armt1	292267	Protein-glutamate O-methyltransferase	8.62556	0.086747	8.42665	0.0121894	8.15273	0.0495847	0.871207	0.871207	0.720551	0.720551	0.827072	0.827072	0.867305	0.146118	0.00398752	0.1235	0.0033	0.0392
10702676	Ccdc170	ENSRNOT00000035962	F1LT05	F1LT05_RAT	F1LT05_RAT Protein Ccdc170 OS=Rattus norvegicus (Rat) GN=Ccdc170 PE=4 SV=2	Ccdc170	292266	Protein Ccdc170	5.13914	0.0132818	5.0956	0.108125	5.06234	0.0516367	0.970271	0.970271	0.948156	0.948156	0.977208	0.977208	0.181903	0.0963113	0.742874	0.8981	0.7233	0.938
10702689	Esr1	NM_012689	P06211	ESR1_RAT	ESR1_RAT Estrogen receptor OS=Rattus norvegicus (Rat) GN=Esr1 PE=1 SV=1	Esr1	24890	Estrogen receptor	7.17353	0.192389	6.37514	0.0336528	5.80519	0.0185229	0.574992	0.559031	0.387336	0.348475	0.673637	0.621877	0.357558	0.0142215	0.000437739	0.0062	0.0004	0.0278
10702695	Esr1	NM_012689	P06211	ESR1_RAT	ESR1_RAT Estrogen receptor OS=Rattus norvegicus (Rat) GN=Esr1 PE=1 SV=1	Esr1	24890	Estrogen receptor	6.88375	0.2391	6.00296	0.065923	5.19229	0.129909	0.54307	0.559031	0.309613	0.348475	0.570116	0.621877	0.920029	0.31852	0.00094442	0.0196	0.0008	0.0275
10702697	---	ENSRNOT00000060666	---	---	---	---	---	---	6.70022	0.446647	7.85631	0.0358188	8.71523	0.138002	2.22853		4.04184		1.81368		0.380996	0.0248565	0.00562024	0.0534	0.0046	0.1435
10702700	Myct1	NM_001106207	D3ZUL5	D3ZUL5_RAT	D3ZUL5_RAT Myc target 1 (Predicted) OS=Rattus norvegicus (Rat) GN=Myct1 PE=4 SV=1	Myct1	292264	Myc target 1 (Predicted)	7.59185	0.105781	7.44646	0.163443	7.14533	0.129629	0.904135	0.904135	0.733807	0.733807	0.811613	0.811613	0.659574	0.859936	0.135233	0.7275	0.1248	0.3307
10702706	Vip	BC158798	B0BNF3	B0BNF3_RAT	B0BNF3_RAT Vip protein OS=Rattus norvegicus (Rat) GN=Vip PE=2 SV=1	Vip	117064	Vip protein	4.06643	0.0573083	3.96213	0.030205	4.01689	0.0298	0.930253	0.930253	0.966242	0.966242	1.03869	1.03869	0.640586	0.686144	0.276786	0.2506	0.6626	0.6626
10702714	---	ENSRNOT00000054326	---	---	---	---	---	---	4.22171	0.0431848	4.50081	0.310618	4.66835	0.413155	1.21344		1.36286		1.12314		0.00248188	0.0763247	0.595871	0.7942	0.5746	0.9197
10702716	---	ENSRNOT00000054091	---	---	---	---	---	---	4.36691	0.254821	5.31621	0.317994	5.53181	0.424473	1.93094		2.24219		1.16119		0.730166	0.803389	0.106957	0.1988	0.113	0.8989
10702720	---	ENSRNOT00000060647	---	---	---	---	---	---	4.06466	0.00507833	4.15458	0.0874784	4.06784	0.0540318	1.06431		1.00221		0.941651		0.00940017	0.0440277	0.524989	0.5716	0.9992	0.5933
10702722	Oprm1	NM_013071	P33535	OPRM_RAT	OPRM_RAT Mu-type opioid receptor OS=Rattus norvegicus (Rat) GN=Oprm1 PE=1 SV=1	Oprm1	25601	Mu-type opioid receptor	4.13424	0.0626103	4.06843	0.0032	4.02731	0.02511	0.955409	0.955409	0.928561	0.928561	0.971899	0.971899	0.00178052	0.0189616	0.236166	0.5001	0.2173	0.7643
10702746	Scaf8	NM_139094	Q63623	SCAF8_RAT	SCAF8_RAT Protein SCAF8 OS=Rattus norvegicus (Rat) GN=Scaf8 PE=1 SV=1	Scaf8	245926	Protein SCAF8	8.38958	0.0245993	8.88315	0.0663836	9.64166	0.0399534	1.40793	1.40793	2.38185	2.38185	1.69174	1.69174	0.124405	0.458237	5.18728e-06	0.0009	0	0.0001
10702768	---	ENSRNOT00000022567	---	---	---	---	---	---	6.46338	0.133219	6.4139	0.156046	6.30216	0.0262965	0.966287		0.89427		0.92547		0.00980792	0.144553	0.634807	0.9532	0.6222	0.7882
10702792	Cldn20	NM_001109394	D3ZT28	D3ZT28_RAT	D3ZT28_RAT Claudin OS=Rattus norvegicus (Rat) GN=Cldn20 PE=3 SV=1	Cldn20	680178	Claudin	4.58904	0.0362018	4.66879	0.0515407	4.51864	0.102277	1.05683	1.05683	0.95237	0.95237	0.901153	0.901153	0.0135189	0.380165	0.375887	0.7294	0.7483	0.3468
10702794	Arid1b	NM_172157	F1LNP1	F1LNP1_RAT	F1LNP1_RAT Protein Arid1b OS=Rattus norvegicus (Rat) GN=Arid1b PE=1 SV=2	Arid1b	282546	Protein Arid1b	8.51147	0.0681474	8.80503	0.0395457	8.94054	0.0851695	1.22566	1.22566	1.34636	1.34636	1.09848	1.09848	0.772787	0.592185	0.00955981	0.0447	0.0087	0.3741
10702815	Zdhhc14	NM_001039343	Q2TGJ5	Q2TGJ5_RAT	Q2TGJ5_RAT Palmitoyltransferase OS=Rattus norvegicus (Rat) GN=Zdhhc14 PE=2 SV=1	Zdhhc14	499014	Palmitoyltransferase	5.78595	0.0152557	5.8181	0.0168993	5.86534	0.0927279	1.02254	0.992586	1.05657	0.944577	1.03329	0.949092	0.000347769	0.0321418	0.636963	0.9233	0.6153	0.8274
10702829	Synj2	NM_001113371	O55207	SYNJ2_RAT	SYNJ2_RAT Synaptojanin-2 OS=Rattus norvegicus (Rat) GN=Synj2 PE=1 SV=2	Synj2	84018	Synaptojanin-2	6.28947	0.128289	6.70356	0.0126612	8.1373	0.04116	1.33245	1.33245	3.59959	3.59959	2.70147	2.70147	0.0236502	0.0353062	7.50401e-06	0.0236	0	0
10702859	Gtf2h5	NM_001126088	D3ZEI7	D3ZEI7_RAT	D3ZEI7_RAT Protein Gtf2h5 OS=Rattus norvegicus (Rat) GN=Gtf2h5 PE=1 SV=1	Gtf2h5	502227	Protein Gtf2h5	9.07589	0.0170196	8.81106	0.132212	8.84262	0.0878787	0.832296	0.832296	0.850705	0.850705	1.02212	1.02212	0.214119	0.0815114	0.161313	0.1797	0.2479	0.9644
10702865	Tulp4	NM_001109137	D3ZFM2	D3ZFM2_RAT	D3ZFM2_RAT Protein Tulp4 OS=Rattus norvegicus (Rat) GN=Tulp4 PE=4 SV=1	Tulp4	499016	Protein Tulp4	8.71443	0.0673556	8.39263	0.131231	8.13199	0.09998	0.80007	0.80007	0.667834	0.667834	0.834719	0.834719	0.696548	0.700056	0.0183353	0.1401	0.0152	0.2375
10702880	Tmem181	BC168231	B4F7D5	B4F7D5_RAT	B4F7D5_RAT Protein Tmem181 OS=Rattus norvegicus (Rat) GN=Tmem181 PE=1 SV=1	Tmem181	502228	Protein Tmem181	7.80385	0.0492323	7.72088	0.0859374	7.72035	0.0446245	0.94411	0.94411	0.943766	0.943766	0.999636	0.999636	0.33897	0.616697	0.603828	0.6664	0.6454	0.9992
10702897	Sytl3	NM_001127560	B2RYA4	B2RYA4_RAT	B2RYA4_RAT Sytl3 protein OS=Rattus norvegicus (Rat) GN=Sytl3 PE=2 SV=1	Sytl3	499017	Sytl3 protein	5.80958	0.002285	5.82902	0.0232778	5.93415	0.126221	1.01356	1.01356	1.09018	1.09018	1.07559	1.07559	7.58563e-06	0	0.504624	0.9809	0.519	0.6218
10702913	Fndc1	NM_001038615	Q2Q0I9	FNDC1_RAT	FNDC1_RAT Fibronectin type III domain-containing protein 1 OS=Rattus norvegicus (Rat) GN=Fndc1	Fndc1	308099	Fibronectin type III domain-containing protein 1	8.41088	0.158508	8.0543	0.0758569	6.7252	0.309537	0.781012	0.781012	0.310857	0.310857	0.398017	0.398017	0.123664	0.255756	0.00266519	0.4876	0.0028	0.009
10702936	Wtap	NM_001113542	D3ZPY0	D3ZPY0_RAT	D3ZPY0_RAT Protein Wtap OS=Rattus norvegicus (Rat) GN=Wtap PE=1 SV=1	Wtap	499020	Protein Wtap	8.97126	0.0557128	9.36503	0.028782	9.65275	0.0229563	1.31382	1.31382	1.6038	1.6038	1.22072	1.22072	0.366844	0.424646	4.86134e-05	0.0009	0	0.0043
10702945	Acat2	NM_001006995	Q5XI22	THIC_RAT	THIC_RAT Acetyl-CoA acetyltransferase, cytosolic OS=Rattus norvegicus (Rat) GN=Acat2 PE=1 SV=1	Acat2	308100	Acetyl-CoA acetyltransferase, cytosolic	6.35222	0.0763892	6.03281	0.0768392	5.96225	0.0812536	0.801398	0.801398	0.763144	0.763144	0.952265	0.952265	0.416251	0.99542	0.0258799	0.0626	0.0278	0.7893
10702955	---	XM_344812	---	---	---	---	---	---	6.2249	0.0784729	6.12991	0.0829483	5.97534	0.0704452	0.936274		0.84115		0.898402		0.586165	0.979818	0.1612	0.6941	0.146	0.4077
10702965	Mrpl18	NM_001106205	B2RZ57	B2RZ57_RAT	B2RZ57_RAT Mitochondrial ribosomal protein L18 OS=Rattus norvegicus (Rat) GN=Mrpl18 PE=1 SV=1	Mrpl18	292244	Mitochondrial ribosomal protein L18	8.79507	0.0683537	8.20051	0.0654758	7.66572	0.0550725	0.662247	0.662247	0.457121	0.457121	0.690258	0.690258	0.450967	0.942649	4.88183e-05	0.0014	0	0.0025		Ribosome proteins and biogenesis
10702970	Pnldc1	NM_001025724	Q4KLL1	Q4KLL1_RAT	Q4KLL1_RAT Poly(A)-specific ribonuclease (PARN)-like domain containing 1 OS=Rattus norvegicus (Rat) GN=Pnldc1 PE=2 SV=1	Pnldc1	361478	Poly(A)-specific ribonuclease (PARN)-like domain containing 1	5.2113	0.0722485	5.21838	0.0229134	5.00583	0.15137	1.00491	1.00491	0.867254	0.867254	0.863012	0.863012	0.00677923	0.121925	0.287605	0.9997	0.3513	0.3415
10702991	Mas1	NM_012757	P12526	MAS_RAT	MAS_RAT Proto-oncogene Mas OS=Rattus norvegicus (Rat) GN=Mas1 PE=2 SV=1	Mas1	25153	Proto-oncogene Mas	4.47338	0.00228533	4.3785	0.0594803	4.46311	0.0125483	0.936355	0.936355	0.992911	0.992911	1.0604	1.0604	0.000357786	0.00945349	0.194256	0.2192	0.979	0.2794
10702996	Igf2r	NM_012756	G3V824	G3V824_RAT	G3V824_RAT Insulin-like growth factor 2 receptor, isoform CRA_b OS=Rattus norvegicus (Rat) GN=Igf2r PE=1 SV=1	Igf2r	25151	Insulin-like growth factor 2 receptor, isoform CRA_b	9.34488	0.0727537	8.95951	0.160083	8.73546	0.0822759	0.765582	0.765582	0.65546	0.65546	0.856159	0.856159	0.271102	0.529424	0.02288	0.1116	0.0199	0.3915
10703045	Slc22a1	NM_012697	Q63089	S22A1_RAT	S22A1_RAT Solute carrier family 22 member 1 OS=Rattus norvegicus (Rat) GN=Slc22a1 PE=1 SV=1	Slc22a1	24904	Solute carrier family 22 member 1	4.79854	0.0489023	4.89349	0.0309985	4.74547	0.0278173	1.06803	1.06803	0.963881	0.963881	0.902487	0.902487	0.697548	0.736935	0.0862337	0.2524	0.6468	0.0784
10703059	---	XR_005880	---	---	---	---	---	---	5.5221	0.0958767	5.61906	0.0262835	5.89471	0.0529708	1.06952		1.29469		1.21054		0.768334	0.303068	0.015982	0.5902	0.0157	0.0521
10703063	Slc22a3	NM_019230	O88446	S22A3_RAT	S22A3_RAT Solute carrier family 22 member 3 OS=Rattus norvegicus (Rat) GN=Slc22a3 PE=2 SV=1	Slc22a3	29504	Solute carrier family 22 member 3	5.16089	0.046915	5.18849	0.115648	5.11495	0.000972	1.01932	1.01932	0.968656	0.968656	0.950301	0.950301	0.00150937	0.00694561	0.7625	0.9434	0.9069	0.744
10703075	Map3k4	NM_001107456	D3ZGU6	D3ZGU6_RAT	D3ZGU6_RAT Mitogen activated protein kinase kinase kinase 4 (Predicted) OS=Rattus norvegicus (Rat) GN=Map3k4 PE=1 SV=1	Map3k4	308106	Mitogen activated protein kinase kinase kinase 4 (Predicted)	8.67355	0.0706036	8.59729	0.0646012	8.2261	0.170821	0.948514	0.948514	0.733338	0.733338	0.773144	0.773144	0.0932398	0.34371	0.0616067	0.8819	0.0669	0.1235
10703102	---	XR_008066	---	---	---	---	---	---	4.29948	0.15615	4.33355	0.146125	4.09062	0.111308	1.02389		0.865221		0.845032		0.585275	0.894761	0.457324	0.9844	0.5679	0.4785
10703104	Pacrg	NM_001077677	A0JPP9	A0JPP9_RAT	A0JPP9_RAT Park2 co-regulated OS=Rattus norvegicus (Rat) GN=Pacrg PE=2 SV=1	Pacrg	499021	Park2 co-regulated	4.82503	0.0500389	4.6307	0.113674	4.67192	0.0530413	0.873979	0.873979	0.899305	0.899305	1.02898	1.02898	0.456502	0.449828	0.263608	0.2682	0.4093	0.9322
10703111	Qk	NM_001115021	B0BNF5	B0BNF5_RAT	B0BNF5_RAT Qk protein OS=Rattus norvegicus (Rat) GN=Qk PE=2 SV=1	Qk	499022	Qk protein	10.1513	0.0329146	10.1949	0.0752127	10.1096	0.0314969	1.03067	1.03067	0.971527	0.971527	0.942615	0.942615	0.608756	0.444897	0.571347	0.848	0.848	0.5432
10703128	Snrpd3	XM_001079870	M0R907	M0R907_RAT	M0R907_RAT Protein Snrpd3 OS=Rattus norvegicus (Rat) GN=Snrpd3 PE=1 SV=1	Snrpd3	687711	Protein Snrpd3	6.81901	0.0750657	7.21931	0.03819	7.92771	0.11889	1.31978	1.31978	2.1565	2.1565	1.63399	1.63399	0.480566	0.420019	0.00025628	0.0365	0.0002	0.0024
10703131	Pabpc6	NM_001106208	B5DF80	B5DF80_RAT	B5DF80_RAT Polyadenylate-binding protein OS=Rattus norvegicus (Rat) GN=Pabpc6 PE=2 SV=1	Pabpc6	292295	Polyadenylate-binding protein	4.8557	0.0554258	4.8391	0.0972795	5.21116	0.0445519	0.988559	0.988559	1.27939	1.27939	1.2942	1.2942	0.757139	0.598606	0.0151159	0.9842	0.026	0.0214
10703133	---	GENSCAN00000023183	---	---	---	---	---	---	6.65167	0.0539774	6.61741	0.0410007	6.38019	0.0797407	0.976535		0.82847		0.848378		0.459939	0.666582	0.0362675	0.919	0.0429	0.0699
10703135	---	XR_006009	---	---	---	---	---	---	4.31339	0.0717379	4.20456	0.0353889	4.1816	0.0322355	0.927336		0.912695		0.984212		0.0592402	0.506398	0.207403	0.3149	0.2228	0.9572
10703137	---	XR_006046	---	---	---	---	---	---	7.30654	0.0375771	7.07182	0.144087	7.20637	0.0368036	0.84985		0.932925		1.09775		0.230515	0.106394	0.251235	0.228	0.7167	0.5665
10703139	Rnaset2	NM_001106210	D3ZCH6	D3ZCH6_RAT	D3ZCH6_RAT Protein Rnaset2 OS=Rattus norvegicus (Rat) GN=Rnaset2 PE=1 SV=1	Rnaset2	292306	Protein Rnaset2	9.29667	0.0681579	9.44133	0.0970634	8.91145	0.0581834	1.10547	1.10547	0.765664	0.765664	0.692612	0.692612	0.653571	0.798186	0.00693652	0.4248	0.0283	0.0066
10703144	Rps6ka2	ENSRNOT00000017809	F1M7N7	F1M7N7_RAT	F1M7N7_RAT Ribosomal protein S6 kinase OS=Rattus norvegicus (Rat) GN=Rps6ka2 PE=3 SV=2	Rps6ka2	117269	Ribosomal protein S6 kinase	10.0289	0.0298394	9.1054	0.0136031	7.58832	0.0535649	0.52724	0.52724	0.184214	0.184214	0.349393	0.349393	0.0572594	0.304584	1.72486e-08	0	0	0		IGF-1/insulin/GH signaling
10703169	Tcp10b	NM_001107461	A0A0G2JYT7	A0A0G2JYT7_RAT	A0A0G2JYT7_RAT Protein Tcp10b OS=Rattus norvegicus (Rat) GN=Tcp10b PE=4 SV=1	Tcp10b	308169	Protein Tcp10b	4.59064	0.0440258	4.73262	0.0400408	4.67772	0.15416	1.10342	1.10342	1.06222	1.06222	0.962666	0.962666	0.849475	0.148895	0.596709	0.5756	0.7942	0.9204
10703183	---	ENSRNOT00000043702	---	---	---	---	---	---	4.93288	0.0495169	5.05637	0.0297937	4.90349	0.082943	1.08936		0.979831		0.899453		0.307212	0.455957	0.224243	0.3464	0.9455	0.2351
10703185	---	ENSRNOT00000060077	---	---	---	---	---	---	4.50536	0.077441	4.5557	0.0245414	4.64036	0.0561718	1.03551		1.0981		1.06044		0.0215505	0.383587	0.295254	0.7876	0.2729	0.5759
10703187	Nlrp6	ENSRNOT00000050551	Q63035	NLRP6_RAT	NLRP6_RAT NACHT, LRR and PYD domains-containing protein 6 OS=Rattus norvegicus (Rat) GN=Nlrp6 PE=1 SV=4	Nlrp6	171390	NACHT, LRR and PYD domains-containing protein 6	6.8512	0.135351	6.73279	0.113203	6.87457	0.0475239	0.921203	0.921203	1.01633	0.983463	1.10326	1.10312	0.750387	0.44098	0.626241	0.7264	0.9866	0.6377
10703189	Mllt4	NM_013217	O35889	AFAD_RAT	AFAD_RAT Afadin OS=Rattus norvegicus (Rat) GN=Mllt4 PE=1 SV=1	Mllt4	26955	Afadin	7.90005	0.0476763	7.99534	0.199078	8.04072	0.0943888	1.06828	1.06828	1.10242	1.10242	1.03195	1.03195	0.877523	0.224991	0.737327	0.8602	0.7251	0.9648
10703216	---	ENSRNOT00000039923	---	---	---	---	---	---	4.79232	0.0688362	4.69657	0.00653981	4.52778	0.100002	0.935784		0.832463		0.889588		0.244189	0.0580308	0.0876503	0.6142	0.0786	0.2716
10703224	---	ENSRNOT00000053951	---	---	---	---	---	---	6.86113	0.0490073	6.91339	0.212179	6.68868	0.1224	1.03689		0.887337		0.855767		0.332751	0.23369	0.537821	0.9587	0.689	0.534
10703226	---	ENSRNOT00000045258	---	---	---	---	---	---	3.35954	0.046433	3.47087	0.0325131	3.38435	0.0431736	1.08023		1.01735		0.941791		0.475781	0.882503	0.217427	0.2208	0.9162	0.3591
10703233	Vom2r7	NM_001099463	D4A515	D4A515_RAT	D4A515_RAT Protein Vom2r11 OS=Rattus norvegicus (Rat) GN=Vom2r7 PE=4 SV=3	Vom2r7	685557	Protein Vom2r11	2.7762	0.00735388	2.81309	0.0362009	2.84068	0.0290244	1.0259	1.0259	1.04571	1.04571	1.01931	1.01931	0.051432	0.25685	0.314137	0.6469	0.2875	0.7418
10703240	Vom2r8	NM_001099464	D3ZYL3	D3ZYL3_RAT	D3ZYL3_RAT Protein Vom2r38 OS=Rattus norvegicus (Rat) GN=Vom2r8 PE=4 SV=1	Vom2r8	685641	Protein Vom2r38	3.09572	0.0220019	2.96692	0.085551	3.09751	0.12917	0.91459	0.91459	1.00124	1.00124	1.09474	1.09474	0.289787	0.160319	0.540135	0.6039	0.9996	0.5892
10703246	Vom2r9	NM_001099465	D3ZJ30	D3ZJ30_RAT	D3ZJ30_RAT Protein Vom2r9 OS=Rattus norvegicus (Rat) GN=Vom2r9 PE=4 SV=1	Vom2r9	685666	Protein Vom2r9	3.13772	0.0392349	3.11291	0.00178067	3.07901	0.0356853	0.982953	0.982953	0.960122	0.960122	0.976773	0.976773	0.0123932	0	0.4495	0.8481	0.4231	0.7211
10703254	Zswim5	NM_001107963	D3ZI38	D3ZI38_RAT	D3ZI38_RAT Protein Zswim5 OS=Rattus norvegicus (Rat) GN=Zswim5 PE=4 SV=1	Zswim5	313524	Protein Zswim5	4.50557	0.120677	4.55029	0.00555933	4.51367	0.031065	1.03148	1.03156	1.00563	1.00237	0.974933	0.971705	0.0300451	0.0120291	0.90755	0.9167	0.9994	0.9294
10703256	---	ENSRNOT00000050327	---	---	---	---	---	---	6.24301	0.244719	7.15726	0.340758	6.92134	0.23862	1.8846		1.60028		0.84914		0.849594	0.874005	0.129253	0.126	0.2714	0.8206
10703272	---	ENSRNOT00000060054	---	---	---	---	---	---	5.5926	0.217587	6.30821	0.276868	6.31257	0.25854	1.64218		1.64715		1.00303		0.574465	0.953088	0.14327	0.1881	0.1859	1
10703274	---	ENSRNOT00000040838	---	---	---	---	---	---	5.95451	0.203491	6.73401	0.308942	6.63614	0.238825	1.71654		1.60396		0.93441		0.779153	0.858564	0.136732	0.1536	0.2162	0.9608
10703279	---	ENSRNOT00000040838	---	---	---	---	---	---	6.26563	0.24388	7.19666	0.26811	6.87784	0.264839	1.90665		1.5286		0.801723		0.951933	0.990954	0.105975	0.0968	0.2883	0.6796
10703283	---	ENSRNOT00000050327	---	---	---	---	---	---	5.63844	0.223037	6.45068	0.331874	6.35813	0.227082	1.75593		1.64683		0.937866		0.542318	0.848842	0.139568	0.1583	0.2167	0.9667
10703287	---	ENSRNOT00000059947	---	---	---	---	---	---	5.07639	0.187849	5.80756	0.286987	5.72263	0.221099	1.65999		1.56509		0.942832		0.674263	0.858824	0.131589	0.1491	0.2074	0.9635
10703289	---	ENSRNOT00000032267	---	---	---	---	---	---	5.42588	0.326823	5.87958	0.275082	5.16248	0.156403	1.36955		0.833126		0.608319		0.378589	0.652723	0.228766	0.4874	0.7641	0.2106
10703293	---	ENSRNOT00000048991	---	---	---	---	---	---	6.55668	0.24802	7.37274	0.308528	7.08946	0.25755	1.76059		1.44672		0.821721		0.989726	0.957277	0.182249	0.1683	0.4092	0.7551
10703301	---	ENSRNOT00000041486	---	---	---	---	---	---	7.03616	0.304407	7.8896	0.334203	7.68919	0.249471	1.8068		1.57247		0.870306		0.68573	0.929693	0.186996	0.1866	0.3347	0.8853
10703308	---	ENSRNOT00000041194	---	---	---	---	---	---	5.36746	0.260029	6.09019	0.238064	6.07473	0.29252	1.6503		1.63271		0.989341		0.489365	0.966861	0.166227	0.2066	0.221	0.9984
10703310	Smoc2	NM_001106215	B5DF75	B5DF75_RAT	B5DF75_RAT Protein Smoc2 OS=Rattus norvegicus (Rat) GN=Smoc2 PE=2 SV=1	Smoc2	292401	Protein Smoc2	8.41604	0.169782	7.63221	0.198798	6.4833	0.0870903	0.580824	0.580824	0.261931	0.261931	0.450965	0.450965	0.443766	0.599436	0.000415681	0.0306	0.0003	0.0053
10703324	---	BC079175	Q6AY64	CF120_RAT	CF120_RAT UPF0669 protein C6orf120 homolog OS=Rattus norvegicus (Rat) PE=2 SV=1	---	100125364	UPF0669 protein C6orf120 homolog	7.35788	0.13228	7.41847	0.0847585	7.77458	0.128805	1.0429	1.0429	1.33487	1.33487	1.27997	1.27997	0.496639	0.826396	0.0863281	0.9306	0.0965	0.1533
10703327	---	ENSRNOT00000020492	---	---	---	---	---	---	7.42452	0.046169	7.59569	0.162727	8.01129	0.0207352	1.12597		1.50188		1.33385		0.280418	0.0540502	0.0146793	0.4766	0.0136	0.0579
10703351	Fam120b	NM_001107466	D4AE88	D4AE88_RAT	D4AE88_RAT Protein Fam120b OS=Rattus norvegicus (Rat) GN=Fam120b PE=1 SV=1	Fam120b	308218	Protein Fam120b	6.75164	0.0821355	6.80309	0.0627316	7.28238	0.0414113	1.0363	1.0363	1.44467	1.44467	1.39406	1.39406	0.212776	0.698066	0.00200747	0.8328	0.0027	0.0045
10703364	Tbp	NM_001004198	Q66HB1	Q66HB1_RAT	Q66HB1_RAT Protein Tbp OS=Rattus norvegicus (Rat) GN=Tbp PE=1 SV=1	Tbp	117526	Protein Tbp	7.57449	0.0936103	8.01798	0.0117993	8.40258	0.0756158	1.35989	1.35989	1.77533	1.77533	1.3055	1.3055	0.861231	0.118543	0.000525408	0.0105	0.0004	0.0203
10703375	Rpl35a	NM_021264	P04646	RL35A_RAT	RL35A_RAT 60S ribosomal protein L35a OS=Rattus norvegicus (Rat) GN=Rpl35a PE=3 SV=1	Rpl35a	57809	60S ribosomal protein L35a	9.74122	0.0450827	9.65254	0.0576531	9.47995	0.066487	0.940381	0.98851	0.834351	0.898756	0.887248	0.909039	0.9409	0.86643	0.045386	0.5369	0.0406	0.1662
10703377	Chd1	NM_001107465	D4AAG9	D4AAG9_RAT	D4AAG9_RAT Protein Chd1 OS=Rattus norvegicus (Rat) GN=Chd1 PE=1 SV=3	Chd1	308215	Protein Chd1	7.67209	0.0699365	8.06416	0.162231	8.96152	0.0518201	1.31228	1.31228	2.44432	2.44432	1.86266	1.86266	0.11398	0.310499	0.000366954	0.0864	0.0003	0.0024
10703398	---	ENSRNOT00000053488	---	---	---	---	---	---	3.14047	0.0876266	3.18022	0.0650591	3.5146	0.00557667	1.02794		1.29606		1.26083		0.0690442	0.0447878	0.0114418	0.9134	0.0146	0.0232
10703400	---	ENSRNOT00000044998	---	---	---	---	---	---	5.61233	0.016736	5.5986	0.0327342	5.54512	0.0801365	0.990527		0.954483		0.963611		0.00729378	0.175601	0.622887	0.9712	0.6207	0.7511
10703403	Riok2	NM_001009687	Q5I0I1	Q5I0I1_RAT	Q5I0I1_RAT Protein Riok2 OS=Rattus norvegicus (Rat) GN=Riok2 PE=1 SV=1	Riok2	308201	Protein Riok2	8.75287	0.0583224	8.90198	0.0661916	9.6498	0.0667254	1.10888	1.10888	1.8621	1.8621	1.67925	1.67925	0.0615492	0.97429	0.000122009	0.2912	0.0001	0.0004		Ribosome proteins and biogenesis
10703414	Lix1	NM_001106214	D3ZAG6	D3ZAG6_RAT	D3ZAG6_RAT Protein Lix1 OS=Rattus norvegicus (Rat) GN=Lix1 PE=4 SV=1	Lix1	292381	Protein Lix1	4.72926	0.0757084	4.5458	0.064434	4.46357	0.262696	0.880588	0.880588	0.831803	0.831803	0.9446	0.9446	0.87638	0.14161	0.522694	0.7097	0.5083	0.9309
10703420	---	ENSRNOT00000040130	---	---	---	---	---	---	2.54776	0.0218143	2.55159	0.0238432	2.60809	0.0385207	1.00266		1.04271		1.03994		0.0125887	0.742521	0.32309	0.9967	0.3673	0.4012
10703424	---	XR_007602	---	---	---	---	---	---	5.79785	0.0712596	5.58035	0.23244	5.8404	0.0614513	0.860056		1.02994		1.19752		0.310529	0.162698	0.448591	0.5733	0.9759	0.4624
10703426	---	rno-mir-99b	---	---	---	---	---	---	7.58712	0.019915	7.72267	0.0436333	7.73299	0.0831625	1.09851		1.1064		1.00718		0.458595	0.294962	0.185165	0.2558	0.2177	0.9908
10703428	---	rno-let-7e	---	---	---	---	---	---	5.41083	0.179254	5.53064	0.134077	5.4121	0.083485	1.08659		1.00088		0.921121		0.964674	0.661796	0.796521	0.8276	1	0.8276
10703430	---	rno-mir-125a	---	---	---	---	---	---	5.95171	0.142557	5.91122	0.0654961	5.96026	0.132749	0.972329		1.00595		1.03458		0.143967	0.604242	0.946578	0.9689	0.9965	0.9457
10703432	---	XM_001053999	---	---	---	---	---	---	7.44745	0.103414	7.98417	0.116173	7.99172	0.0638019	1.45067		1.45828		1.00524		0.609695	0.775683	0.0118244	0.0189	0.0184	0.9997
10703434	---	XM_001053999	---	---	---	---	---	---	6.40215	0.0529706	6.90843	0.172755	6.85208	0.167731	1.42038		1.36598		0.961699		0.303181	0.347808	0.0891886	0.1036	0.1482	0.958
10703439	LOC688452	ENSRNOT00000014598	B6ETS2	B6ETS2_RAT	B6ETS2_RAT Protein LOC688452 OS=Rattus norvegicus (Rat) GN=LOC688452 PE=2 SV=1	LOC688452	688452	Protein LOC688452	6.25729	0.0432671	6.38908	0.0969117	6.55076	0.139157	1.09565	1.09565	1.22559	1.22559	1.11859	1.11859	0.192077	0.392139	0.192963	0.6377	0.1722	0.5212
10703443	Fpr3	ENSRNOT00000041605	D4A8L8	D4A8L8_RAT	D4A8L8_RAT Protein Fpr2 OS=Rattus norvegicus (Rat) GN=Fpr3 PE=3 SV=2	Fpr3	292413	Protein Fpr2	3.40845	0.111566	3.3998	0.0448027	3.54824	0.103642	0.994019	0.994019	1.10174	1.10174	1.10837	1.10837	0.190211	0.49175	0.492555	0.9943	0.581	0.5259
10703445	---	XM_218016	---	---	---	---	---	---	3.57065	0.125912	3.76963	0.0727847	3.60578	0.104089	1.14789		1.02465		0.892637		0.748499	0.787419	0.406916	0.4244	0.9772	0.5274
10703447	Vom2r10	NM_001099469	D4A741	D4A741_RAT	D4A741_RAT Protein Vom2r10 OS=Rattus norvegicus (Rat) GN=Vom2r10 PE=4 SV=2	Vom2r10	292414	Protein Vom2r10	2.95438	0.0493292	2.94748	0.0172979	2.94234	0.0216065	0.995224	0.995224	0.991686	0.991686	0.996445	0.996445	0.400781	0.390577	0.956625	0.9749	0.9559	0.9972
10703455	Vom1r2	NM_001008903	Q5J3G1	Q5J3G1_RAT	Q5J3G1_RAT Protein Vom1r2 OS=Rattus norvegicus (Rat) GN=Vom1r2 PE=2 SV=1	Vom1r2	494253	Protein Vom1r2	3.26796	0.0212643	3.2367	0.033421	3.24999	0.0281575	0.978566	0.978566	0.987618	0.987618	1.00925	1.00925	0.318594	0.778408	0.724118	0.7053	0.8776	0.943
10703457	Vom1r3	NM_001009517	Q5J3G8	Q5J3G8_RAT	Q5J3G8_RAT Protein Vom1r3 OS=Rattus norvegicus (Rat) GN=Vom1r3 PE=2 SV=1	Vom1r3	494237	Protein Vom1r3	2.77632	0.0372822	2.73771	0.0390437	2.81792	0.0422864	0.973592	0.973592	1.02925	1.02925	1.05717	1.05717	0.944665	0.981816	0.428384	0.8041	0.7407	0.3995
10703459	Vom1r4	NM_001009516	Q5J3H2	Q5J3H2_RAT	Q5J3H2_RAT Protein Vom1r3 OS=Rattus norvegicus (Rat) GN=Vom1r4 PE=2 SV=1	Vom1r4	494236	Protein Vom1r3	2.97074	0.0924867	2.88655	0.0306388	2.93778	0.00201267	0.943313	0.943313	0.977414	0.977414	1.03615	1.03615	0.0172569	0.00897728	0.593302	0.5697	0.907	0.8064
10703461	---	ENSRNOT00000050523	---	---	---	---	---	---	2.81841	0.0710923	3.12299	0.348929	2.70351	0.0672509	1.23506		0.923444		0.74769		0.000240654	0.0639408	0.398885	0.589	0.9189	0.3894
10703463	Vom1r6	NM_001009512	Q5J3M0	Q5J3M0_RAT	Q5J3M0_RAT Protein Vom1r6 OS=Rattus norvegicus (Rat) GN=Vom1r6 PE=2 SV=1	Vom1r6	494231	Protein Vom1r6	3.03843	0.0630051	3.05247	0.00650433	3.03187	0.0842538	1.00978	1.00978	0.995463	0.995463	0.985822	0.985822	0.134083	0.0475189	0.964821	0.9872	0.9928	0.9616
10703465	Taf5l	NM_001107442	B1H284	B1H284_RAT	B1H284_RAT Protein RGD1563991 OS=Rattus norvegicus (Rat) GN=Taf5l PE=1 SV=1	Taf5l	307927	Protein RGD1563991	7.63519	0.0293139	7.52932	0.0953331	8.01972	0.0804776	0.929241	0.914138	1.30543	1.29522	1.40484	1.41741	0.604289	0.37204	0.007744	0.5919	0.0244	0.008
10703467	Vom1r8	NM_001008905	Q5J3N4	Q5J3N4_RAT	Q5J3N4_RAT Protein Vom1r8 OS=Rattus norvegicus (Rat) GN=Vom1r8 PE=2 SV=1	Vom1r8	494258	Protein Vom1r8	3.25753	0.0671227	3.39385	0.0691917	3.39263	0.14818	1.09909	1.09909	1.09817	1.09817	0.999158	0.999158	0.104708	0.488244	0.575182	0.6357	0.6227	0.9997
10703469	---	ENSRNOT00000044128	---	---	---	---	---	---	2.68645	0.0622515	2.71448	0.055542	2.72101	3.14018e-16	1.01962		1.02424		1.00453		0.11123	0	0.891254	0.9195	0.8996	0.9987
10703477	---	ENSRNOT00000059681	---	---	---	---	---	---	2.84305	0.10966	3.1529	0.0304439	3.26489	0.120539	1.23958		1.33964		1.08072		0.653657	0.273782	0.045836	0.1283	0.0442	0.6893
10703479	Ppp2r1a	NM_057140	Q5XI34	Q5XI34_RAT	Q5XI34_RAT Protein Ppp2r1a OS=Rattus norvegicus (Rat) GN=Ppp2r1a PE=1 SV=1	Ppp2r1a	117281	Protein Ppp2r1a	9.97643	0.0524166	10.0511	0.0580032	10.5287	0.0591276	1.05314	1.05314	1.46641	1.46641	1.39241	1.39241	0.12642	0.989729	0.000829895	0.6189	0.001	0.0022
10703495	---	GENSCAN00000016071	---	---	---	---	---	---	6.46193	0.117642	6.66587	0.104692	6.78679	0.142577	1.15184		1.25254		1.08743		0.545707	0.925087	0.246139	0.517	0.2263	0.7644
10703499	Vom1r111	NM_001009522	Q5J3E4	Q5J3E4_RAT	Q5J3E4_RAT Vomeronasal V1r-type receptor V1rf4 OS=Rattus norvegicus (Rat) GN=Vom1r111 PE=2 SV=1	Vom1r111	494242	Vomeronasal V1r-type receptor V1rf4	2.97725	0.097594	2.87966	0	2.87191	0.0961264	0.93459	0.977187	0.929583	0.969908	0.994642	0.992639	0.023201	0	0.596188	0.676	0.6249	0.9955
10703501	Vom1r23	NM_001008941	Q5J3F1	Q5J3F1_RAT	Q5J3F1_RAT Protein Vom1r23 OS=Rattus norvegicus (Rat) GN=Vom1r23 PE=2 SV=1	Vom1r23	494288	Protein Vom1r23	3.29198	0.0532517	3.21698	0.0217483	3.21129	0.08118	0.949342	0.974671	0.945599	0.962594	0.996057	0.987823	0.219416	0.345021	0.57469	0.6405	0.6176	0.9991
10703503	Vom1r19	NM_001008954	Q5J3E2	Q5J3E2_RAT	Q5J3E2_RAT Protein Vom1r19 OS=Rattus norvegicus (Rat) GN=Vom1r19 PE=2 SV=1	Vom1r19	494298	Protein Vom1r19	3.10633	0.0218157	3.14883	0.120299	3.01183	0.0171813	1.0299	1.0299	0.936596	0.936596	0.909407	0.909407	0.005746	0.034666	0.434356	0.9046	0.6449	0.4184
10703505	Vom1r20	NM_001009506	Q5J3G6	Q5J3G6_RAT	Q5J3G6_RAT Protein Vom1r20 OS=Rattus norvegicus (Rat) GN=Vom1r20 PE=2 SV=1	Vom1r20	494225	Protein Vom1r20	3.96125	0.0481827	3.97469	0.0864802	3.84911	0.0639563	1.00936	1.00936	0.925215	0.925215	0.916635	0.916635	0.442155	0.771005	0.404058	0.984	0.5135	0.4278
10703508	---	XM_001081377	---	---	---	---	---	---	4.73143	0.103493	5.85451	0.172159	6.94282	0.403862	2.17811		4.63122		2.12626		0.453724	0.236092	0.00284571	0.0505	0.0023	0.0566
10703510	Vom1r21	NM_001009510	Q5J3H1	Q5J3H1_RAT	Q5J3H1_RAT Protein Vom1r21 OS=Rattus norvegicus (Rat) GN=Vom1r21 PE=2 SV=1	Vom1r21	494229	Protein Vom1r21	3.50676	0	3.43394	0.0728143	3.56452	0.0471257	0.950781	0.950781	1.04085	1.04085	1.09473	1.09473	0.00114768	0	0.282661	0.5912	0.7485	0.2586
10703512	Zfp52	NM_001014158	Q5U2X3	Q5U2X3_RAT	Q5U2X3_RAT Protein Zfp52 OS=Rattus norvegicus (Rat) GN=Zfp52 PE=2 SV=1	Zfp52	361487	Protein Zfp52	5.89004	0.098733	6.01532	0.134748	6.48505	0.0821907	1.09072	1.09072	1.51048	1.51048	1.38485	1.38485	0.485492	0.823751	0.0167964	0.6829	0.0173	0.0476
10703564	Rpl18a	ENSRNOT00000025421	P62718	RL18A_RAT	RL18A_RAT 60S ribosomal protein L18a OS=Rattus norvegicus (Rat) GN=Rpl18a PE=2 SV=1	Rpl18a	290641	60S ribosomal protein L18a	12.3379	0.0367154	12.5024	0.0890519	12.6817	0.0416945	1.12074	1.12074	1.26911	1.24143	1.13239	1.11995	0.35831	0.406376	0.0193566	0.2072	0.016	0.1703
10703566	---	ENSRNOT00000059644	---	---	---	---	---	---	3.22181	0.0704485	3.32712	0.03906	3.00804	0.072968	1.07573		0.862281		0.801579		0.499242	0.759744	0.0280598	0.4884	0.112	0.0252
10703568	Vom2r12	NM_001099488	A0A0G2JZW0	A0A0G2JZW0_RAT	A0A0G2JZW0_RAT Protein Vom2r12 OS=Rattus norvegicus (Rat) GN=Vom2r12 PE=4 SV=1	Vom2r12	690566	Protein Vom2r12	3.29761	0.209893	3.37158	0.276945	3.77765	0.0923386	1.05261	1.12416	1.39478	1.272	1.32507	1.1431	0.131809	0.43853	0.281082	0.9663	0.2979	0.3991
10703570	Vom2r12	NM_001099488	A0A0G2JZW0	A0A0G2JZW0_RAT	A0A0G2JZW0_RAT Protein Vom2r12 OS=Rattus norvegicus (Rat) GN=Vom2r12 PE=4 SV=1	Vom2r12	690566	Protein Vom2r12	4.27902	0.0154209	4.53688	0.0320938	4.47967	0.13825	1.1957	1.12416	1.14922	1.272	0.961124	1.1431	0.263844	0.027114	0.151352	0.1531	0.2799	0.8822
10703573	---	ENSRNOT00000048009	---	---	---	---	---	---	2.77914	0.0281226	2.93704	0.0445993	2.90111	0.105575	1.11566		1.08822		0.975399		0.292651	0.266759	0.277068	0.2782	0.4344	0.9234
10703575	---	ENSRNOT00000046597	---	---	---	---	---	---	2.62332	0.0938585	2.66028	0.0239789	2.88716	0.126417	1.02595		1.20067		1.17029		0.365598	0.22157	0.165868	0.9576	0.182	0.2588
10703583	---	XR_007895	---	---	---	---	---	---	6.7989	0.199337	6.89155	0.00734633	6.85143	0.0281828	1.06633		1.03709		0.972576		0.00752153	0.00392079	0.86251	0.8505	0.9503	0.9678
10703589	Vom2r80	NM_001111321	A0A0G2JYG8	A0A0G2JYG8_RAT	A0A0G2JYG8_RAT Protein Vom2r80 OS=Rattus norvegicus (Rat) GN=Vom2r80 PE=4 SV=1	Vom2r80	502285	Protein Vom2r80	3.76397	0.0612268	4.01072	0.0270656	3.89968	0.0833269	1.18653	1.18653	1.09863	1.09863	0.925919	0.925919	0.651684	0.39389	0.0774076	0.0665	0.3413	0.4432
10703593	Vom2r16	NM_001099655	A0A0G2JYA5	A0A0G2JYA5_RAT	A0A0G2JYA5_RAT Protein Vom2r16 OS=Rattus norvegicus (Rat) GN=Vom2r16 PE=4 SV=1	Vom2r16	690691	Protein Vom2r16	4.18732	0.0578904	4.41657	0.0612028	4.31043	0.0791452	1.17223	1.17223	1.08908	1.08908	0.929065	0.929065	0.965367	0.928364	0.126048	0.1101	0.4412	0.5312
10703599	Vom2r18	NM_173318	O35268	O35268_RAT	O35268_RAT Protein LOC100365824 OS=Rattus norvegicus (Rat) GN=Vom2r18 PE=2 SV=1	Vom2r18	286984	Protein LOC100365824	3.14559	0.0522844	3.22118	0.0479222	3.1646	0.0375985	1.05379	1.05379	1.01326	1.01326	0.961539	0.961539	0.450104	0.891508	0.525995	0.5195	0.9517	0.6868
10703603	---	NM_001099491	---	---	---	---	---	---	3.19959	0.0870235	3.12404	0.00856993	3.11268	0.0926995	0.948976		0.941534		0.992158		0.152843	0.0604028	0.693495	0.7663	0.7122	0.9948
10703614	Vom2r19	NM_001099492	D3ZDW0	D3ZDW0_RAT	D3ZDW0_RAT Protein Vom2r19 OS=Rattus norvegicus (Rat) GN=Vom2r19 PE=4 SV=1	Vom2r19	690729	Protein Vom2r19	3.58461	0.0200563	3.48987	0.0688114	3.63427	0.138617	0.936438	0.936438	1.03502	1.03502	1.10527	1.10527	0.0466824	0.112027	0.538566	0.752	0.9083	0.5172
10703618	Vom2r21	NM_001099651	O70415	O70415_RAT	O70415_RAT Putative pheromone receptor V2R3 OS=Rattus norvegicus (Rat) GN=Vom2r21 PE=2 SV=1	Vom2r21	100101439	Putative pheromone receptor V2R3	2.6261	0.0579175	2.81971	0.0774375	2.85123	0.0506479	1.14362	1.14362	1.16888	1.16888	1.02209	1.02209	0.854908	0.852294	0.0847742	0.1484	0.0959	0.9381
10703626	Vom2r22	NM_001099656	D3ZFX7	D3ZFX7_RAT	D3ZFX7_RAT Protein LOC100365824 OS=Rattus norvegicus (Rat) GN=Vom2r22 PE=4 SV=2	Vom2r22	690758	Protein LOC100365824	3.37952	0.101968	3.41411	0.118318	3.60735	0.0719153	1.02427	1.02427	1.17108	1.17108	1.14333	1.14333	0.597178	0.809698	0.291414	0.9628	0.306	0.4152
10703632	Vom2r24	NM_001099493	M0RC83	M0RC83_RAT	M0RC83_RAT Protein Vom2r24 OS=Rattus norvegicus (Rat) GN=Vom2r24 PE=4 SV=1	Vom2r24	690816	Protein Vom2r24	3.51231	0.151542	3.71174	0.119677	3.52771	0.0821571	1.14825	1.14825	1.01073	1.01073	0.880238	0.880238	0.987657	0.744115	0.474566	0.5145	0.9967	0.556
10703638	---	ENSRNOT00000009039	---	---	---	---	---	---	3.49739	0.228905	3.58469	0.0372908	3.65095	0.0754168	1.06238		1.11231		1.047		0.974606	0.0866692	0.754781	0.8969	0.7368	0.947
10703640	Vom2r25	NM_001099482	M0RDF3	M0RDF3_RAT	M0RDF3_RAT Protein Vom2r25 OS=Rattus norvegicus (Rat) GN=Vom2r25 PE=4 SV=1	Vom2r25	502286	Protein Vom2r25	2.76203	0.0646511	2.95323	0.0642046	2.88909	0.0165769	1.14172	1.14172	1.09206	1.09206	0.95651	0.95651	0.777083	0.238643	0.114606	0.1063	0.2887	0.7204
10703644	Vom2r27	ENSRNOT00000036807	O35269	O35269_RAT	O35269_RAT Protein Vom2r27 OS=Rattus norvegicus (Rat) GN=Vom2r27 PE=2 SV=1	Vom2r27	286914	Protein Vom2r27	2.76907	0.038458	2.70547	0.128672	2.72633	0.0184422	0.956876	0.956876	0.970809	1.01131	1.01456	0.989722	0.0342028	0.0564014	0.846043	0.8387	0.9197	0.9821
10703648	---	ENSRNOT00000014877	---	---	---	---	---	---	9.9984	0.0077791	10.3321	0.148158	10.914	0.10496	1.26024		1.88639		1.49686		0.131267	0.0189969	0.00241831	0.1389	0.0021	0.0189
10703652	Vom1r27	NM_001008952	M0R872	M0R872_RAT	M0R872_RAT Protein Vom1r27 OS=Rattus norvegicus (Rat) GN=Vom1r27 PE=4 SV=2	Vom1r27	494297	Protein Vom1r27	4.37169	0.128688	4.31144	0.0356827	4.34975	0.0557299	0.959094	0.959094	0.984908	0.984908	1.02691	1.02691	0.38942	0.243189	0.869865	0.859	0.9728	0.9495
10703654	Vom1r28	NM_001008966	Q5J3F7	Q5J3F7_RAT	Q5J3F7_RAT Protein LOC103691019 OS=Rattus norvegicus (Rat) GN=Vom1r28 PE=2 SV=1	Vom1r28	494308	Protein LOC103691019	3.20551	0.089958	3.19996	0.0598111	3.29862	0.0929917	0.996157	0.996157	1.06666	1.06666	1.07078	1.07078	0.430782	0.845858	0.671781	0.9982	0.7342	0.7021
10703656	Vom1r29	NM_001008946	Q5J3G4	Q5J3G4_RAT	Q5J3G4_RAT Protein LOC100911045 OS=Rattus norvegicus (Rat) GN=Vom1r29 PE=2 SV=1	Vom1r29	494292	Protein LOC100911045	3.22332	0.0273614	3.25947	0.0597472	3.16696	0.0531631	1.02537	1.02537	0.961685	0.961685	0.937889	0.937889	0.225098	0.575295	0.450216	0.8613	0.7084	0.4253
10703658	---	NM_001009509	---	---	---	---	---	---	3.06172	0.0671191	3.15498	0.0720953	3.16459	0.058129	1.06677		1.07391		1.00669		0.695833	0.963641	0.542918	0.631	0.572	0.9939
10703660	Vom1r30	NM_001009511	Q5J3I9	Q5J3I9_RAT	Q5J3I9_RAT Protein Vom1r30 OS=Rattus norvegicus (Rat) GN=Vom1r30 PE=2 SV=1	Vom1r30	494230	Protein Vom1r30	3.11228	0.088545	3.23827	0.0515727	3.29049	0.118902	1.09125	1.09125	1.13147	1.13147	1.03686	1.03686	0.57367	0.616519	0.413488	0.6174	0.4	0.9081
10703662	---	XR_008258	---	---	---	---	---	---	3.58169	0.117782	3.71207	0.0465153	3.74876	0.036858	1.09458		1.12278		1.02576		0.0139485	0.306167	0.317641	0.484	0.3165	0.9259
10703666	Lilrb2Nilr1	NM_031713	A0A140TAJ6	A0A140TAJ6_RAT	Neutrophil immunoglobulin-like receptor-1	Lilrb2Nilr1	---	---	4.32849	0.0359042	4.22903	0.0582208	4.28048	0	0.933381	0.933381	0.967271	0.967271	1.03631	1.03631	0.277693	0	0.277047	0.2513	0.6971	0.6294
10703680	Lilrb3l	NM_001037357	D3ZVK8	D3ZVK8_RAT	D3ZVK8_RAT Protein Lilrb3l OS=Rattus norvegicus (Rat) GN=Lilrb3l PE=4 SV=1	Lilrb3l	361493	Protein Lilrb3l	4.16762	0.0819033	4.17264	0.147644	4.03411	0.0979392	1.00349	1.00349	0.911612	0.911612	0.908444	0.908444	0.488083	0.720473	0.619357	0.9998	0.676	0.6639
10703706	---	XM_001065765	---	---	---	---	---	---	3.9175	0.0459065	3.82021	0.0241936	3.88966	0.0125731	0.934791		0.980891		1.04932		0.619122	0.262652	0.155731	0.1475	0.792	0.336
10703708	---	XM_001076224	---	---	---	---	---	---	8.57911	0.0543435	8.14429	0.170689	8.47941	0.0723675	0.739785		0.933224		1.26148		0.0911836	0.305573	0.0732223	0.0737	0.8091	0.1647
10703710	---	XM_001076276	---	---	---	---	---	---	2.85838	0.0171363	2.9301	0.105567	2.96261	0.0575382	1.05097		1.07492		1.02279		0.167222	0.14292	0.581819	0.7703	0.5634	0.9287
10703715	---	ENSRNOT00000017002	---	---	---	---	---	---	5.65978	0.025907	5.65141	0.0214214	5.42694	0.0444742	0.994215		0.850953		0.855905		0.0985928	0.586226	0.00294264	0.9721	0.0044	0.0055
10703723	Tmc4	NM_001034104	Q496Z4	TMC4_RAT	TMC4_RAT Transmembrane channel-like protein 4 OS=Rattus norvegicus (Rat) GN=Tmc4 PE=2 SV=1	Tmc4	308310	Transmembrane channel-like protein 4	5.297	0.0623406	5.27457	0.008746	5.29369	0.0334656	0.984572	0.984572	0.997706	0.997706	1.01334	1.01334	0.0722646	0.0727589	0.919462	0.9165	0.9928	0.9562
10703739	Leng1	NM_001106218	D3ZER8	D3ZER8_RAT	D3ZER8_RAT Leukocyte receptor cluster (LRC) member 1 (Predicted) OS=Rattus norvegicus (Rat) GN=Leng1 PE=1 SV=1	Leng1	292535	Leukocyte receptor cluster (LRC) member 1 (Predicted)	6.59754	0.0682942	6.84823	0.0966989	7.013	0.024345	1.18978	1.18978	1.33372	1.33372	1.12098	1.12098	0.253696	0.283195	0.0153214	0.097	0.013	0.2824
10703744	Tfpt	NM_138870	Q9JMG6	TFPT_RAT	TFPT_RAT TCF3 fusion partner homolog OS=Rattus norvegicus (Rat) GN=Tfpt PE=1 SV=2	Tfpt	85423	TCF3 fusion partner homolog	8.06791	0.0368152	8.23751	0.150984	8.48908	0.0940573	1.12475	1.12475	1.33901	1.33901	1.1905	1.1905	0.117604	0.260178	0.0791378	0.5364	0.0693	0.2858
10703751	---	ENSRNOT00000037943	---	---	---	---	---	---	4.92944	0.0536423	5.07248	0.0606133	5.12204	0.0579812	1.10423		1.14282		1.03495		0.41924	0.992511	0.120972	0.2652	0.1168	0.7996
10703757	---	ENSRNOT00000059241	---	---	---	---	---	---	3.68261	0.00885367	3.69623	0.0948439	3.69146	3.14018e-16	1.00949		1.00616		0.996701		0.00567412	0	0.984425	0.9842	0.991	0.999
10703764	---	ENSRNOT00000059239	---	---	---	---	---	---	4.67172	0.0887884	4.68818	0.0105017	4.69314	0.015469	1.01147		1.01496		1.00345		0.0239576	0.0185147	0.95705	0.9711	0.9587	0.9988
10703771	---	XM_001057358	---	---	---	---	---	---	6.20527	0.0890986	6.24622	0.0984946	6.18934	0.0976579	1.02879		0.98902		0.961347		0.110331	0.990451	0.916011	0.9611	0.9882	0.9104
10703774	Olr1l	NM_001000538	A0A0G2K2G2	A0A0G2K2G2_RAT	A0A0G2K2G2_RAT Olfactory receptor OS=Rattus norvegicus (Rat) GN=Olr1l PE=3 SV=1	Olr1l	365170	Olfactory receptor	6.27135	0.0526367	6.25774	0.100695	6.1711	0.043066	0.990607	0.990607	0.932871	0.932871	0.941716	0.941716	0.623474	0.511507	0.56076	0.9902	0.5821	0.6575
10703776	---	ENSRNOT00000043650	---	---	---	---	---	---	4.0816	0.0509266	4.07174	0.00299033	4.04779	0.0243956	0.993189		0.976834		0.983533		0.0342928	0	0.771795	0.9749	0.7632	0.8732
10703787	LOC292543	BC098062	Q4V799	Q4V799_RAT	Q4V799_RAT Similar to solute carrier family 7 (Cationic amino acid transporter, y+ system), member 3 OS=Rattus norvegicus (Rat) GN=LOC292543 PE=2 SV=1	LOC292543	292543	Similar to solute carrier family 7 (Cationic amino acid transporter, y+ system), member 3	3.86691	0.0331393	3.89515	0.001981	3.9382	0.0383532	1.01977	1.01977	1.05066	1.05066	1.03029	1.03029	0.00277398	0.0565388	0.296296	0.7504	0.2713	0.6111
10703800	Vom2r-ps45	AF016183	O35270	O35270_RAT	O35270_RAT Putative pheromone receptor OS=Rattus norvegicus (Rat) GN=Vom2r-ps45 PE=2 SV=1	Vom2r-ps45	286982	Putative pheromone receptor	3.79746	0.0308101	3.90609	0.0545557	3.82409	0.0527301	1.0782	1.0782	1.01863	1.01863	0.944744	0.944744	0.446381	0.773471	0.321698	0.3192	0.9223	0.4925
10703810	Vom2r28	NM_001099472	D4ADJ0	D4ADJ0_RAT	D4ADJ0_RAT Protein Vom2r28 OS=Rattus norvegicus (Rat) GN=Vom2r28 PE=4 SV=3	Vom2r28	292547	Protein Vom2r28	3.05484	0.0157216	2.97453	0.102734	3.05006	0.0710432	0.94586	0.94586	0.996697	0.996697	1.05375	1.05375	0.118202	0.149723	0.689528	0.7164	0.9977	0.7523
10703818	Zfp418	ENSRNOT00000020751	D3ZVT0	D3ZVT0_RAT	D3ZVT0_RAT Protein LOC691135 OS=Rattus norvegicus (Rat) GN=Zfp418 PE=4 SV=3	Zfp418	292548	Protein LOC691135	6.49928	0.0790952	6.71321	0.190067	6.86113	0.110948	1.15984	1.15984	1.28507	1.28507	1.10797	1.10797	0.780931	0.532944	0.24478	0.5393	0.2231	0.7348
10703820	Hiat1	NM_001106467	B1H293	B1H293_RAT	B1H293_RAT Hippocampus abundant gene transcript 1 OS=Rattus norvegicus (Rat) GN=Hiat1 PE=2 SV=1	Hiat1	103689987	Hippocampus abundant gene transcript 1	8.3386	0.0830995	8.34191	0.156099	8.72267	0.0377086	1.00229	1.00693	1.30501	1.31285	1.30202	1.3038	0.24548	0.251713	0.0641684	0.9997	0.0891	0.0916
10703823	Zfp954	NM_001107472	D4A7C1	D4A7C1_RAT	D4A7C1_RAT Protein Zfp954 OS=Rattus norvegicus (Rat) GN=Zfp954 PE=4 SV=1	Zfp954	308320	Protein Zfp954	4.98488	0.0850338	4.81199	0.116684	5.03492	0.125095	0.887064	0.887064	1.03529	1.03529	1.16709	1.16709	0.620553	0.870737	0.387252	0.5458	0.9461	0.3882
10703838	---	ENSRNOT00000020124	---	---	---	---	---	---	8.64092	0.0799278	8.46133	0.245	8.60831	0.233609	0.882956		0.977655		1.10725		0.992413	0.40085	0.795687	0.8009	0.9924	0.8603
10703850	Zim1	NM_001107473	A0A0G2KA26	A0A0G2KA26_RAT	A0A0G2KA26_RAT Protein Zim1 OS=Rattus norvegicus (Rat) GN=Zim1 PE=4 SV=1	Zim1	308322	Protein Zim1	7.65301	0.0232848	6.13467	0.106137	5.20466	0.101136	0.349088	0.349088	0.18322	0.18322	0.524853	0.524853	0.116505	0.231706	2.8583e-06	0	0	0.0006
10703856	Olr3	NM_001000110	D3ZYT7	D3ZYT7_RAT	D3ZYT7_RAT Olfactory receptor OS=Rattus norvegicus (Rat) GN=Olr3 PE=3 SV=1	Olr3	292559	Olfactory receptor	5.30977	0.020554	5.32809	0.050114	5.36448	0.0995066	1.01278	1.01278	1.03865	1.03865	1.02555	1.02555	0.045316	0.187513	0.844249	0.9823	0.837	0.9181
10703858	Olr4	NM_001000111	M0RD62	M0RD62_RAT	M0RD62_RAT Olfactory receptor OS=Rattus norvegicus (Rat) GN=Olr4 PE=3 SV=2	Olr4	292560	Olfactory receptor	4.90857	0.0663489	4.93581	0.104468	4.84708	0.0057608	1.01906	1.01906	0.958271	0.958271	0.940348	0.940348	0.607963	0.0107927	0.684105	0.9537	0.8309	0.6694
10703860	---	NM_001000112	---	---	---	---	---	---	4.01149	0.0181151	3.94601	0.0719104	4.01498	0	0.955632		1.00242		1.04896		4.55765e-05	0	0.485766	0.5448	1	0.5448
10703862	Olr6	NM_001000539	M0R4S8	M0R4S8_RAT	M0R4S8_RAT Olfactory receptor OS=Rattus norvegicus (Rat) GN=Olr6 PE=3 SV=1	Olr6	365175	Olfactory receptor	4.54117	0.0936288	4.73723	0.106344	4.64253	0.0905322	1.14557	1.14557	1.07278	1.07278	0.936464	0.936464	0.586004	0.981589	0.421754	0.3924	0.7487	0.788
10703864	Zfp583	ENSRNOT00000039438	F1M0F0	F1M0F0_RAT	F1M0F0_RAT Protein Zfp583 OS=Rattus norvegicus (Rat) GN=Zfp583 PE=4 SV=3	Zfp583	499068	Protein Zfp583	4.39037	0.0982704	4.64732	0.0449317	4.52293	0.0625299	1.19495	1.19495	1.09623	1.09623	0.917391	0.917391	0.427357	0.604929	0.110431	0.0957	0.4415	0.4737
10703868	Zfp787	NM_001108904	D3ZDN6	D3ZDN6_RAT	D3ZDN6_RAT Protein Zfp787 OS=Rattus norvegicus (Rat) GN=Zfp787 PE=1 SV=1	Zfp787	365176	Protein Zfp787	5.57795	0.0228832	5.3806	0.0653208	5.39894	0.0465509	0.872151	0.872151	0.88331	0.88331	1.01279	1.01279	0.764551	0.519762	0.046201	0.0577	0.079	0.9663
10703873	---	ENSRNOT00000059037	---	---	---	---	---	---	3.97158	0.150311	4.08256	0.135686	3.84158	0.0537856	1.07996		0.913831		0.846174		0.0617867	0.470603	0.421468	0.7897	0.7467	0.3922
10703879	LOC100361016	ENSRNOT00000050817	F1LTG3	F1LTG3_RAT	F1LTG3_RAT Protein LOC691325 OS=Rattus norvegicus (Rat) GN=LOC100361016 PE=4 SV=1	LOC100361016	100361016	Protein LOC691325	5.3351	0	5.32461	0.0611112	5.30427	0.0777111	0.992753	0.992999	0.97886	0.993931	0.986005	1.00093	0.204635	0	0.904346	0.9771	0.8955	0.9673
10703883	Vom1r32	NM_001008937	Q5J3H3	Q5J3H3_RAT	Q5J3H3_RAT Protein Vom1r32 OS=Rattus norvegicus (Rat) GN=Vom1r32 PE=2 SV=1	Vom1r32	494284	Protein Vom1r32	3.93911	0.0389038	4.04341	0.112523	3.98465	0.042715	1.07497	1.07497	1.03207	1.03207	0.960088	0.960088	0.0257699	0.295511	0.629738	0.6059	0.9098	0.8364
10703886	---	ENSRNOT00000053809	---	---	---	---	---	---	3.63004	0	3.69476	0.064716	3.60385	0.118914	1.04588		0.98201		0.938932		0.0989096	0	0.714918	0.8368	0.9681	0.7052
10703888	---	XR_009516	---	---	---	---	---	---	3.56223	0.0304745	3.51494	0.0531447	3.60836	0.0244001	0.967755		1.0325		1.0669		0.0944467	0.534849	0.30937	0.6722	0.7078	0.2821
10703890	Vom1r37	NM_001008923	Q5J3H7	Q5J3H7_RAT	Q5J3H7_RAT Protein Vom1r37 OS=Rattus norvegicus (Rat) GN=Vom1r37 PE=2 SV=1	Vom1r37	494272	Protein Vom1r37	3.48786	0.0436065	3.42938	0.019417	3.45142	0.0715486	0.96028	0.96028	0.97506	0.97506	1.01539	1.01539	0.90939	0.356817	0.702452	0.6804	0.8831	0.9229
10703893	Vom1r38	NM_001008964	Q5J3H6	Q5J3H6_RAT	Q5J3H6_RAT Protein Vom1r38 OS=Rattus norvegicus (Rat) GN=Vom1r38 PE=2 SV=1	Vom1r38	494307	Protein Vom1r38	3.82171	0.00822933	3.83969	0.130153	3.96235	0.0183101	1.01254	1.01254	1.10239	1.10239	1.08874	1.08874	0.557261	0.00415368	0.416622	0.9868	0.4428	0.5216
10703895	---	XR_008826	---	---	---	---	---	---	3.05762	0.071077	3.0025	0.0335351	3.02164	0.00349333	0.962519		0.97537		1.01335		0.0221856	0.0169698	0.691877	0.6754	0.843	0.9495
10703902	---	XR_008826	---	---	---	---	---	---	3.02665	0.0492234	2.87163	0.0356849	3.07614	0.0652792	0.898118		1.0349		1.1523		0.73387	0.752735	0.0680643	0.1611	0.7812	0.0676
10703905	Rasl2-9	AF507943	Q8K586	RANT_RAT	RANT_RAT GTP-binding nuclear protein Ran, testis-specific isoform OS=Rattus norvegicus (Rat) GN=Rasl2-9 PE=2 SV=1	Rasl2-9	751812	GTP-binding nuclear protein Ran, testis-specific isoform	7.21937	0.0935246	7.21114	0.0861547	7.29247	0.0369341	0.994313	0.994313	1.05197	1.05197	1.05799	1.05799	0.0720066	0.49062	0.709885	0.9952	0.7796	0.7278
10703907	Rfpl4a	NM_001106222	D4ABM4	RFPLA_RAT	RFPLA_RAT Ret finger protein-like 4A OS=Rattus norvegicus (Rat) GN=Rfpl4a PE=3 SV=1	Rfpl4a	292583	Ret finger protein-like 4A	4.61157	0.0392238	4.72661	0.0334533	4.70084	0.0111633	1.083	1.083	1.06383	1.06383	0.982298	0.982298	0.0843515	0.303128	0.0764453	0.0764	0.173	0.8035
10703910	Zfp865	ENSRNOT00000021917	D4A0V8	D4A0V8_RAT	D4A0V8_RAT Protein Zfp865 OS=Rattus norvegicus (Rat) GN=Zfp865 PE=4 SV=1	Zfp865	308337	Protein Zfp865	5.76826	0.0445384	5.74338	0.118861	5.6725	0.0895801	0.982897	0.982897	0.935776	0.935776	0.952059	0.952059	0.160409	0.519377	0.726048	0.9757	0.7203	0.8344
10703914	Fiz1	NM_001106223	D3ZP93	D3ZP93_RAT	D3ZP93_RAT Protein Fiz1 OS=Rattus norvegicus (Rat) GN=Fiz1 PE=4 SV=1	Fiz1	292584	Protein Fiz1	7.01113	0.0571564	6.96341	0.04332	7.22355	0.0919647	0.96746	0.96746	1.15863	1.15863	1.1976	1.1976	0.306354	0.613213	0.0683422	0.879	0.1368	0.0734
10703917	Zfp579	NM_001126276	B1WBW3	B1WBW3_RAT	B1WBW3_RAT Protein Zfp579 OS=Rattus norvegicus (Rat) GN=Zfp579 PE=2 SV=1	Zfp579	308339	Protein Zfp579	6.63118	0.005999	6.64979	0.0140456	6.69805	0.0746111	1.01298	1.01298	1.04744	1.04744	1.03402	1.03402	0.000141165	0.0172183	0.617778	0.9638	0.6113	0.7578
10703922	Sbk2	BC161893	B1WBU5	SBK2_RAT	SBK2_RAT Serine/threonine-protein kinase SBK2 OS=Rattus norvegicus (Rat) GN=Sbk2 PE=2 SV=1	Sbk2	691411	Serine/threonine-protein kinase SBK2	6.364	0.0774243	6.13185	0.0461139	5.69449	0.0568106	0.851365	0.851365	0.628721	0.628721	0.738485	0.738485	0.618925	0.827441	0.000720154	0.0814	0.0006	0.0058
10703930	Isoc2	NM_001008367	Q5U3Z3	ISOC2_RAT	ISOC2_RAT Isochorismatase domain-containing protein 2 OS=Rattus norvegicus (Rat) GN=Isoc2 PE=2 SV=1	Isoc2	361501	Isochorismatase domain-containing protein 2	8.19031	0.041241	7.68942	0.0603451	6.41244	0.12532	0.706674	0.706674	0.291615	0.291615	0.412659	0.412659	0.0938211	0.343133	1.46977e-05	0.0132	0	0.0001
10703937	Shisa7	ENSRNOT00000022698	D3ZPJ0	D3ZPJ0_RAT	D3ZPJ0_RAT Protein Shisa7 OS=Rattus norvegicus (Rat) GN=Shisa7 PE=1 SV=1	Shisa7	691429	Protein Shisa7	5.82205	0.0607216	5.72735	0.0912557	5.70479	0.0244708	0.936462	0.936462	0.921935	0.921935	0.984487	0.984487	0.392831	0.345295	0.463175	0.6174	0.463	0.9554
10703945	---	XM_001078232	---	---	---	---	---	---	5.02469	0	5.01892	0.0135938	4.93528	0.160656	0.996009		0.939905		0.943671		0.000330792	0	0.769282	0.9997	0.7974	0.8107
10703947	Ube2s	NM_001106224	B5DFI8	UBE2S_RAT	UBE2S_RAT Ubiquitin-conjugating enzyme E2 S OS=Rattus norvegicus (Rat) GN=Ube2s PE=2 SV=1	Ube2s	292588	Ubiquitin-conjugating enzyme E2 S	9.52389	0.0377715	9.64885	0.143341	9.55335	0.114584	1.09048	1.09048	1.02063	1.02063	0.935947	0.935947	0.663058	0.309243	0.708681	0.71	0.9832	0.8065
10703951	---	ENSRNOT00000023246	---	---	---	---	---	---	7.56573	0.118022	7.60853	0.0824469	7.12338	0.0745047	1.03011		0.735936		0.714427		0.65072	0.830081	0.018349	0.9426	0.0347	0.0236
10703953	Il11	NM_133519	G3V890	G3V890_RAT	G3V890_RAT Interleukin-11 OS=Rattus norvegicus (Rat) GN=Il11 PE=4 SV=1	Il11	171040	Interleukin-11	5.53145	0.085571	5.40818	0.061306	5.26271	0.0386176	0.918105	0.918105	0.830043	0.830043	0.904083	0.904083	0.284634	0.632371	0.0707223	0.4403	0.0607	0.3153
10703960	Fam71e2	BC161877	B1WBT2	B1WBT2_RAT	B1WBT2_RAT Protein Fam71e2 OS=Rattus norvegicus (Rat) GN=Fam71e2 PE=2 SV=1	Fam71e2	308344	Protein Fam71e2	4.28203	0.0365627	4.17207	0.103888	4.19887	0.0326063	0.926618	0.926618	0.943986	0.943986	1.01874	1.01874	0.0553423	0.232674	0.496476	0.4948	0.6495	0.9572
10703970	Cox6b2	NM_001039085	Q6YFQ1	CX6B2_RAT	CX6B2_RAT Cytochrome c oxidase subunit 6B2 OS=Rattus norvegicus (Rat) GN=Cox6b2 PE=2 SV=1	Cox6b2	654441	Cytochrome c oxidase subunit 6B2	4.7508	0.0896277	4.8564	0.0708182	4.85281	0.162555	1.07595	1.07595	1.07327	1.07327	0.997513	0.997513	0.613219	0.563841	0.762718	0.7928	0.8037	0.9998
10703975	Tmem150b	NM_001107476	D3ZEH7	D3ZEH7_RAT	D3ZEH7_RAT Protein Tmem150b OS=Rattus norvegicus (Rat) GN=Tmem150b PE=4 SV=1	Tmem150b	308346	Protein Tmem150b	4.96684	0.0445016	4.84785	0.030244	4.88866	0.0105667	0.920835	0.920835	0.947255	0.947255	1.02869	1.02869	0.043876	0.242534	0.0900816	0.0824	0.2543	0.6659
10703983	Hspbp1	NM_139261	Q6IMX7	HPBP1_RAT	HPBP1_RAT Hsp70-binding protein 1 OS=Rattus norvegicus (Rat) GN=Hspbp1 PE=1 SV=1	Hspbp1	246146	Hsp70-binding protein 1	7.25809	0.107064	7.09263	0.0486357	6.84682	0.0599408	0.891642	0.891642	0.751961	0.751961	0.843344	0.843344	0.476923	0.564606	0.0255677	0.3424	0.0217	0.1429
10703991	Ppp6r1	ENSRNOT00000024400	D3ZG37	D3ZG37_RAT	D3ZG37_RAT Protein Ppp6r1 OS=Rattus norvegicus (Rat) GN=Ppp6r1 PE=1 SV=1	Ppp6r1	361502	Protein Ppp6r1	9.30172	0.0284794	9.1039	0.0445721	9.2721	0.052294	0.871867	0.871867	0.97968	0.97968	1.12366	1.12366	0.680479	0.711978	0.0351435	0.0399	0.8794	0.0729
10704014	Tmem86b	NM_001109604	G3V9A6	G3V9A6_RAT	G3V9A6_RAT Lysoplasmalogenase OS=Rattus norvegicus (Rat) GN=Tmem86b PE=1 SV=1	Tmem86b	690610	Lysoplasmalogenase	6.04703	0.145913	6.37279	0.0733752	6.65778	0.0312045	1.25333	1.25333	1.52705	1.52705	1.2184	1.2184	0.493996	0.176606	0.0121354	0.1196	0.0099	0.1687
10704018	Ptprh	D45413	Q64642	Q64642_RAT	Q64642_RAT Brain-enriched membrane-associated protein tyrosine phosphatase (BEM)-2 OS=Rattus norvegicus (Rat) GN=Ptprh PE=2 SV=4	Ptprh	171125	Brain-enriched membrane-associated protein tyrosine phosphatase (BEM)-2	5.51721	0.0609712	5.46354	0.0404368	5.32582	0.103595	0.963484	0.963484	0.875762	0.875762	0.908953	0.908953	0.682797	0.470944	0.230506	0.848	0.2209	0.4273
10704035	Syt5	NM_019350	P47861	SYT5_RAT	SYT5_RAT Synaptotagmin-5 OS=Rattus norvegicus (Rat) GN=Syt5 PE=1 SV=1	Syt5	54309	Synaptotagmin-5	5.02481	0.0829766	5.13752	0.0843369	5.12846	0.0445797	1.08126	1.08126	1.07449	1.07449	0.993739	0.993739	0.459709	0.714959	0.510943	0.552	0.5874	0.9977
10704045	Dnaaf3	ENSRNOT00000058900	D3ZCM9	DAAF3_RAT	DAAF3_RAT Dynein assembly factor 3, axonemal OS=Rattus norvegicus (Rat) GN=Dnaaf3 PE=3 SV=1	Dnaaf3	100359753	Dynein assembly factor 3, axonemal	4.52798	0.0965217	4.45523	0.0367517	4.3539	0.0775607	0.950821	0.950821	0.886331	0.886331	0.932174	0.932174	0.034191	0.517159	0.322611	0.791	0.2984	0.6134
10704062	Tnni3	NM_017144	P23693	TNNI3_RAT	TNNI3_RAT Troponin I, cardiac muscle OS=Rattus norvegicus (Rat) GN=Tnni3 PE=1 SV=2	Tnni3	29248	Troponin I, cardiac muscle	4.6398	0.040952	4.54774	0.0165013	4.54664	0.017271	0.93818	0.93818	0.937465	0.937465	0.999238	0.999238	0.0216528	0.387395	0.0821718	0.1132	0.1132	1
10704071	Tnnt1	NM_134388	Q7TNB2	TNNT1_RAT	TNNT1_RAT Troponin T, slow skeletal muscle OS=Rattus norvegicus (Rat) GN=Tnnt1 PE=1 SV=3	Tnnt1	171409	Troponin T, slow skeletal muscle	10.5287	0.125839	9.96867	0.189726	9.56617	0.28241	0.678303	0.678303	0.513171	0.513171	0.756551	0.756551	0.528831	0.607094	0.0457591	0.2205	0.0391	0.4099
10704084	---	ENSRNOT00000032627	---	---	---	---	---	---	7.42551	0.01886	7.47902	0.134217	7.4382	0.0905294	1.03779		1.00884		0.972104		0.0785719	0.0982014	0.918527	0.9172	0.9945	0.9522
10704107	Rdh13	NM_001108468	D3ZFR9	D3ZFR9_RAT	D3ZFR9_RAT Protein Rdh13 OS=Rattus norvegicus (Rat) GN=Rdh13 PE=1 SV=1	Rdh13	361504	Protein Rdh13	7.75851	0.040429	6.93928	0.0946483	6.39692	0.177101	0.566744	0.566744	0.389154	0.389154	0.686648	0.686648	0.283811	0.232061	0.00054543	0.0065	0.0004	0.04
10704118	Vom1r33	NM_001008942	Q5J3H0	Q5J3H0_RAT	Q5J3H0_RAT Vomeronasal V1r-type receptor V1rd22 OS=Rattus norvegicus (Rat) GN=Vom1r33 PE=2 SV=1	Vom1r33	292580	Vomeronasal V1r-type receptor V1rd22	3.31537	0.0491768	3.37097	0.0623058	3.43095	0.0590874	1.0393	1.02998	1.08342	1.0651	1.04245	1.03402	0.263833	0.920582	0.418577	0.7893	0.3893	0.7435
10704120	---	ENSRNOT00000040646	---	---	---	---	---	---	3.16804	0.0548846	3.13663	0.0312606	3.39948	0.0439145	0.97846		1.17401		1.19985		0.66639	0.815549	0.0110516	0.8848	0.0234	0.0137
10704127	Cdc42ep5	NM_001108469	D3ZWQ6	D3ZWQ6_RAT	D3ZWQ6_RAT CDC42 effector protein (Rho GTPase binding) 5 (Predicted) OS=Rattus norvegicus (Rat) GN=Cdc42ep5 PE=4 SV=1	Cdc42ep5	361505	CDC42 effector protein (Rho GTPase binding) 5 (Predicted)	6.27734	0.107897	6.23156	0.0597222	6.06116	0.108279	0.968771	0.968771	0.860844	0.860844	0.888594	0.888594	0.247358	0.715224	0.304116	0.9446	0.3102	0.4491
10704129	Leng9	ENSRNOT00000025138	D3ZWP2	D3ZWP2_RAT	D3ZWP2_RAT Protein Leng9 OS=Rattus norvegicus (Rat) GN=Leng9 PE=1 SV=2	Leng9	100912286	Protein Leng9	5.78364	0.0162578	5.92164	0.105202	5.80297	0.0134603	1.10038	1.10038	1.0135	1.0135	0.921041	0.921041	7.06205e-05	0.0258107	0.294047	0.3075	0.9607	0.4205
10704133	Lair1	NM_001029928	P0C1X9	LAIR1_RAT	LAIR1_RAT Leukocyte-associated immunoglobulin-like receptor 1 OS=Rattus norvegicus (Rat) GN=Lair1 PE=2 SV=1	Lair1	574531	Leukocyte-associated immunoglobulin-like receptor 1	4.60073	0.0989647	4.514	0.0865169	4.48736	0.094286	0.941653	0.941653	0.924427	0.924427	0.981706	0.981706	0.646783	0.980747	0.687525	0.8077	0.6815	0.9718
10704143	Vom2r29	NM_001099496	D3ZB66	D3ZB66_RAT	D3ZB66_RAT Protein Vom2r29 OS=Rattus norvegicus (Rat) GN=Vom2r29 PE=4 SV=3	Vom2r29	691560	Protein Vom2r29	2.61296	0.0834521	2.59018	0.004877	2.51567	0.0376585	0.984336	0.984336	0.934786	0.934786	0.949662	0.949662	0.411155	0.0137021	0.460577	0.9607	0.4634	0.6077
10704147	---	ENSRNOT00000044846	---	---	---	---	---	---	5.02659	0	5.06775	0.041162	5.01786	0.0154204	1.02894		0.993966		0.966007		0.000185468	0	0.379007	0.5246	0.9562	0.3852
10704153	---	ENSRNOT00000039910	M0RCH4	M0RCH4_RAT	M0RCH4_RAT Uncharacterized protein OS=Rattus norvegicus (Rat) PE=3 SV=2	---	---	Uncharacterized protein	4.59237	0.0247357	4.46538	0.0342332	4.52417	0	0.91574	0.91574	0.953828	0.953828	1.04159	1.04159	0.569631	0	0.0214335	0.018	0.1356	0.2954
10704155	Vom2r30	NM_001099467	D3ZE87	D3ZE87_RAT	D3ZE87_RAT Protein Vom2r30 OS=Rattus norvegicus (Rat) GN=Vom2r30 PE=4 SV=2	Vom2r30	289295	Protein Vom2r30	2.70052	0.04305	2.70602	0.047793	2.65248	0.0150332	1.00382	1.00382	0.967244	0.967244	0.963567	0.963567	0.00678976	0.39586	0.534585	0.9979	0.6092	0.5748
10704162	Vom2r31	NM_173319	Q9QWK0	Q9QWK0_RAT	Q9QWK0_RAT Putative pheromone receptor OS=Rattus norvegicus (Rat) GN=Vom2r31 PE=2 SV=1	Vom2r31	286985	Putative pheromone receptor	3.92769	0.0409788	4.02544	0.0587697	4.07399	0.0680497	1.0701	1.00813	1.10673	1.079	1.03423	1.07266	0.386609	0.833775	0.261894	0.5187	0.243	0.7938
10704167	Vom2r31	NM_173319	Q9QWK0	Q9QWK0_RAT	Q9QWK0_RAT Putative pheromone receptor OS=Rattus norvegicus (Rat) GN=Vom2r31 PE=2 SV=1	Vom2r31	286985	Putative pheromone receptor	3.11065	0.00669833	3.03081	0.0366275	3.18278	0.095235	0.946165	1.00813	1.05127	1.079	1.11108	1.07266	0.00557962	0.0269092	0.272679	0.6476	0.6704	0.2467
10704169	---	ENSRNOT00000047949	---	---	---	---	---	---	3.51898	0.081946	3.30614	0.0316797	3.52877	0.0899971	0.862838		1.00681		1.16686		0.535522	0.452338	0.120244	0.1705	0.9947	0.1504
10704173	Vom2r32	NM_173315	O35266	O35266_RAT	O35266_RAT Putative pheromone receptor OS=Rattus norvegicus (Rat) GN=Vom2r32 PE=2 SV=1	Vom2r32	286981	Putative pheromone receptor	3.19797	0.0278895	3.19423	0.0524723	3.43094	0.0774239	0.997406	0.997406	1.17525	1.17525	1.1783	1.1783	0.125322	0.500443	0.0401634	0.999	0.0602	0.0572
10704180	Vom1r42	NM_001008959	Q5J3K4	Q5J3K4_RAT	Q5J3K4_RAT Protein Vom1r42 OS=Rattus norvegicus (Rat) GN=Vom1r42 PE=2 SV=1	Vom1r42	494303	Protein Vom1r42	3.24041	0.0294315	3.32542	0.0395926	3.21957	0.027129	1.0607	1.0607	0.985659	0.985659	0.929257	0.929257	0.265795	0.882616	0.12685	0.232	0.8985	0.1321
10704182	LOC100362054	ENSRNOT00000045266	F1M100	F1M100_RAT	F1M100_RAT Protein LOC100362054 OS=Rattus norvegicus (Rat) GN=LOC100362054 PE=4 SV=3	LOC100362054	100362054	Protein LOC100362054	3.64058	0.0399919	3.62222	0.011791	3.5444	0.0302057	0.987351	0.987351	0.935502	0.935502	0.947486	0.947486	0.611425	0.408225	0.128641	0.9202	0.1371	0.2249
10704186	Vom1r43	NM_001008932	Q5J3J1	Q5J3J1_RAT	Q5J3J1_RAT Protein Vom1r43 OS=Rattus norvegicus (Rat) GN=Vom1r43 PE=2 SV=1	Vom1r43	494280	Protein Vom1r43	3.73911	0.023582	3.76677	0.00979267	3.79304	0.036061	1.01936	1.01936	1.03809	1.03809	1.01837	1.01837	0.0642954	0.322934	0.399706	0.7545	0.3703	0.7545
10704188	Vom1r44	NM_001008902	Q5J3K3	Q5J3K3_RAT	Q5J3K3_RAT Protein Vom1r44 OS=Rattus norvegicus (Rat) GN=Vom1r44 PE=2 SV=1	Vom1r44	494254	Protein Vom1r44	3.10008	0.113576	3.08469	0.01489	3.08194	0.0121453	0.989385	0.989385	0.987504	0.987504	0.998099	0.998099	0.0131656	0.0125121	0.979334	0.9829	0.9829	1
10704190	Vom1r45	NM_001008940	Q5J3I2	Q5J3I2_RAT	Q5J3I2_RAT Protein Vom1r45 OS=Rattus norvegicus (Rat) GN=Vom1r45 PE=2 SV=1	Vom1r45	494287	Protein Vom1r45	3.02579	0.0899926	2.98434	0.0352366	3.05346	0.035318	0.971674	0.971674	1.01936	1.01936	1.04908	1.04908	0.718316	0.313152	0.72167	0.8698	0.9478	0.704
10704194	Vom1r46	NM_001008939	Q5J3G2	Q5J3G2_RAT	Q5J3G2_RAT Protein Vom1r46 OS=Rattus norvegicus (Rat) GN=Vom1r46 PE=2 SV=1	Vom1r46	494286	Protein Vom1r46	3.56007	0.00224233	3.47036	0.0491857	3.56866	0.0108333	0.939711	0.939711	1.00597	1.00597	1.07051	1.07051	0.000740419	0	0.0821895	0.1348	0.9654	0.0976
10704196	Vom1r49	NM_001008920	Q5J3K7	Q5J3K7_RAT	Q5J3K7_RAT Vomeronasal V1r-type receptor V1rg8 OS=Rattus norvegicus (Rat) GN=Vom1r49 PE=2 SV=1	Vom1r49	494269	Vomeronasal V1r-type receptor V1rg8	2.77221	0.0874963	2.77457	0.0431419	2.84632	0.0686921	1.00164	1.00164	1.05271	1.05271	1.05099	1.05099	0.146459	0.688621	0.713001	0.9994	0.7451	0.764
10704198	LOC100911426	ENSRNOT00000043603	D3ZDE0	D3ZDE0_RAT	D3ZDE0_RAT Protein LOC100911426 OS=Rattus norvegicus (Rat) GN=LOC100911426 PE=4 SV=3	LOC100911426	100911426	Protein LOC100911426	5.15357	0.110622	5.27984	0.121252	5.26628	0.0566228	1.09147	1.09147	1.08126	1.08126	0.990642	0.990642	0.860725	0.601878	0.639878	0.664	0.7173	0.9951
10704200	Vom1r51	NM_001008933	Q5J3E0	Q5J3E0_RAT	Q5J3E0_RAT Protein LOC100364634 OS=Rattus norvegicus (Rat) GN=Vom1r51 PE=2 SV=1	Vom1r51	494281	Protein LOC100364634	5.35269	0.020855	5.39524	0.0925751	5.38231	0.0503334	1.02993	1.02993	1.02074	1.02074	0.991079	0.991079	0.401835	0.215435	0.881558	0.8761	0.9379	0.9873
10704202	Vom1r52	NM_001008930	Q5J3D7	Q5J3D7_RAT	Q5J3D7_RAT Protein LOC100364634 OS=Rattus norvegicus (Rat) GN=Vom1r52 PE=2 SV=1	Vom1r52	494278	Protein LOC100364634	4.23229	0.0161645	4.26418	0.0103347	4.25384	0	1.02235	1.02235	1.01505	1.01505	0.992862	0.992862	0.00477052	0	0.203542	0.1899	0.4255	0.7881
10704204	Vom1r53	NM_001008934	Q5J3E1	Q5J3E1_RAT	Q5J3E1_RAT Protein Vom1r53 OS=Rattus norvegicus (Rat) GN=Vom1r53 PE=2 SV=1	Vom1r53	292607	Protein Vom1r53	4.15539	0.0948478	4.14115	0.0951355	4.16276	0.0440663	0.990184	0.990184	1.00512	1.00512	1.01509	1.01509	0.190273	0.587627	0.985075	0.9959	0.9959	0.9836
10704206	---	ENSRNOT00000052271	---	---	---	---	---	---	7.242	0.0232587	7.08742	0.0979141	6.16246	0.110395	0.898389		0.473177		0.526694		0.0285236	0.216728	0.000235998	0.4546	0.0003	0.0007
10704215	LOC691722	ENSRNOT00000026074	D4ADP8	D4ADP8_RAT	D4ADP8_RAT Protein LOC682846 OS=Rattus norvegicus (Rat) GN=LOC691722 PE=4 SV=2	LOC691722	691722	Protein LOC682846	6.03247	0.138381	6.72866	0.338821	5.8662	0.0493043	1.62023	1.62023	0.891148	0.891148	0.550013	0.550013	0.0328807	0.0950304	0.0606826	0.1305	0.8425	0.0637
10704223	Nrif1	NM_001024775	Q4V8E9	NRIF1_RAT	NRIF1_RAT Neurotrophin receptor-interacting factor 1 OS=Rattus norvegicus (Rat) GN=Nrif1 PE=2 SV=1	Nrif1	308362	Neurotrophin receptor-interacting factor 1	8.5195	0.0747473	9.4633	0.152888	9.86133	0.120988	1.92359	1.92359	2.53473	2.53473	1.31771	1.31771	0.178447	0.671539	0.000588783	0.0035	0.0005	0.1262
10704234	LOC102553002	ENSRNOT00000006118	E9PT35	E9PT35_RAT	E9PT35_RAT Protein LOC100360337 OS=Rattus norvegicus (Rat) GN=LOC102553002 PE=4 SV=2	LOC102553002	---	Protein LOC100360337	6.1779	0.110831	6.66557	0.0259987	6.92493	0.151976	1.40219	1.40219	1.67834	1.67834	1.19695	1.19695	0.772122	0.171603	0.0077641	0.0434	0.0068	0.2913
10704239	Zscan22	ENSRNOT00000026305	D4ADL6	D4ADL6_RAT	D4ADL6_RAT Protein Zscan22 OS=Rattus norvegicus (Rat) GN=Zscan22 PE=4 SV=1	Zscan22	---	Protein Zscan22	6.5839	0.130531	6.94883	0.00616362	7.51949	0.0747086	1.28782	1.28782	1.91266	1.91266	1.4852	1.4852	0.541289	0.0182455	0.000815603	0.0581	0.0007	0.0086
10704242	Rps5	NM_001105722	P24050	RS5_RAT	RS5_RAT 40S ribosomal protein S5 OS=Rattus norvegicus (Rat) GN=Rps5 PE=1 SV=3	Rps5	25538	40S ribosomal protein S5	9.77158	0.0680528	9.95271	0.210093	9.96075	0.0669758	1.13377	1.13377	1.1401	1.1401	1.00559	1.00559	0.523988	0.220881	0.547864	0.6087	0.5987	0.9998
10704249	Rnf225	NM_001109334	D3ZF25	D3ZF25_RAT	D3ZF25_RAT Protein Rnf225 OS=Rattus norvegicus (Rat) GN=Rnf225 PE=4 SV=1	Rnf225	502300	Protein Rnf225	5.58916	0.0745012	5.61053	0.0159613	5.47399	0.120575	1.01492	1.01492	0.923276	0.923276	0.909701	0.909701	0.00629241	0.117157	0.484964	0.9888	0.587	0.5097
10704251	Mzf1	NM_001108470	D3ZF35	D3ZF35_RAT	D3ZF35_RAT Protein Mzf1 OS=Rattus norvegicus (Rat) GN=Mzf1 PE=4 SV=1	Mzf1	361508	Protein Mzf1	5.56188	0.0243594	5.53018	0.00501765	5.5407	0.00460033	0.978267	0.978267	0.98543	0.98543	1.00732	1.00732	0.00776414	0.0356034	0.451528	0.4231	0.7458	0.8261
10704266	Ube2m	NM_001108471	D3ZNQ6	D3ZNQ6_RAT	D3ZNQ6_RAT Protein Ube2m OS=Rattus norvegicus (Rat) GN=Ube2m PE=1 SV=1	Ube2m	361509	Protein Ube2m	9.75655	0.0190855	9.82658	0.0961287	9.72272	0.051984	1.04974	1.04974	0.97682	0.97682	0.930537	0.930537	0.0205703	0.153531	0.561176	0.7336	0.9423	0.5484
10704281	Zbtb45	NM_001107478	D4A1A3	D4A1A3_RAT	D4A1A3_RAT Protein Zbtb45 OS=Rattus norvegicus (Rat) GN=Zbtb45 PE=4 SV=1	Zbtb45	308366	Protein Zbtb45	5.95894	0.0873691	5.91009	0.0879743	5.42644	0.0812755	0.966703	0.966703	0.691356	0.691356	0.715169	0.715169	0.360261	0.992304	0.00914943	0.924	0.012	0.0183
10704284	Slc27a5	NM_024143	Q9ES38	S27A5_RAT	S27A5_RAT Bile acyl-CoA synthetase OS=Rattus norvegicus (Rat) GN=Slc27a5 PE=1 SV=1	Slc27a5	79111	Bile acyl-CoA synthetase	4.30777	0.149224	4.31741	0.0509862	4.03641	0.139544	1.00671	1.00671	0.828542	0.828542	0.823019	0.823019	0.619506	0.423875	0.258498	0.9967	0.3308	0.3017
10704297	LOC108348135	NM_001008929	Q5J3N0	Q5J3N0_RAT	Q5J3N0_RAT Vomeronasal type-1 receptor OS=Rattus norvegicus (Rat) GN=LOC108348135	LOC108348135	494277	Vomeronasal type-1 receptor	2.93308	0.0369119	3.36825	0.0184771	3.06802	0.12695	1.35207	1.35207	1.09805	1.09805	0.812124	0.812124	0.074944	0.0603964	0.0191673	0.0176	0.4866	0.0754
10704299	Vom1r58	NM_001009507	F7EQ62	F7EQ62_RAT	F7EQ62_RAT Protein Vom1r58 OS=Rattus norvegicus (Rat) GN=Vom1r58 PE=4 SV=2	Vom1r58	494226	Protein Vom1r58	3.36683	0.125851	3.46376	0	3.47018	0.0153172	1.06949	1.06949	1.07427	1.07427	1.00446	1.00446	2.07665e-05	0	0.566562	0.651	0.5957	0.9947
10704301	Vom1r59	NM_001008944	Q5J3M8	Q5J3M8_RAT	Q5J3M8_RAT Protein LOC100911688 OS=Rattus norvegicus (Rat) GN=Vom1r59 PE=2 SV=1	Vom1r59	494290	Protein LOC100911688	2.77779	0.0104132	2.78459	0.0189127	2.84543	0.0686673	1.00472	1.03356	1.048	1.06557	1.04307	1.0313	0.000155482	0.0700854	0.479472	0.9925	0.5101	0.5732
10704303	Vom1r59	NM_001008944	Q5J3M8	Q5J3M8_RAT	Q5J3M8_RAT Protein LOC100911688 OS=Rattus norvegicus (Rat) GN=Vom1r59 PE=2 SV=1	Vom1r59	494290	Protein LOC100911688	3.36414	0.0553259	3.45147	0.0208393	3.47936	0.0632111	1.0624	1.03356	1.08314	1.06557	1.01952	1.0313	0.577362	0.385857	0.309693	0.4896	0.3046	0.909
10704306	Vom1r61	NM_001008935	Q5J3H4	Q5J3H4_RAT	Q5J3H4_RAT Protein Vom1r61 OS=Rattus norvegicus (Rat) GN=Vom1r61 PE=2 SV=1	Vom1r61	494282	Protein Vom1r61	3.19803	0.0356853	3.15412	0.106376	3.18901	0.0724774	0.970026	0.970026	0.993772	0.993772	1.02448	1.02448	0.574994	0.445649	0.926119	0.9289	0.9979	0.9499
10704310	Vom1r62	NM_001008943	Q5J3K1	Q5J3K1_RAT	Q5J3K1_RAT Protein Vom1r62 OS=Rattus norvegicus (Rat) GN=Vom1r62 PE=2 SV=1	Vom1r62	494289	Protein Vom1r62	3.24115	0.00555233	3.25268	0.0228378	3.2467	0	1.00802	1.00802	1.00386	1.00386	0.995865	0.995865	0.0146281	0	0.847004	0.8385	0.9235	0.9801
10704312	Lig1	NM_001024268	Q566D8	Q566D8_RAT	Q566D8_RAT DNA ligase OS=Rattus norvegicus (Rat) GN=Lig1 PE=1 SV=1	Lig1	81513	DNA ligase	7.04815	0.0801591	7.3367	0.064558	7.44185	0.100019	1.22141	1.22141	1.31375	1.31375	1.0756	1.0756	0.968225	0.867839	0.0334587	0.1009	0.0322	0.6469
10704341	Pla2g4cl1	ENSRNOT00000033633	F1LY61	F1LY61_RAT	F1LY61_RAT Protein Pla2g4c OS=Rattus norvegicus (Rat) GN=Pla2g4cl1 PE=4 SV=1	Pla2g4cl1	---	Protein Pla2g4c	3.77259	0.166882	3.96616	0.0867178	4.04284	0.151628	1.14359	1.14359	1.20602	1.20602	1.05459	1.05459	0.870096	0.690647	0.428464	0.619	0.4178	0.9223
10704356	Cabp5	NM_001108907	D3ZW89	D3ZW89_RAT	D3ZW89_RAT Calcium binding protein 5 (Predicted), isoform CRA_b OS=Rattus norvegicus (Rat) GN=Cabp5 PE=4 SV=1	Cabp5	365194	Calcium binding protein 5 (Predicted), isoform CRA_b	4.48757	0.134876	4.52001	0.18148	4.59451	0.144936	1.02273	1.02273	1.07693	1.07693	1.053	1.053	0.319138	0.916395	0.887449	0.9848	0.8805	0.946
10704365	---	XM_001079751	---	---	---	---	---	---	2.83868	0.0174979	2.98131	0.0570177	2.88468	0.0318221	1.10391		1.0324		0.935221		0.0635002	0.370498	0.0859689	0.079	0.6716	0.2411
10704370	Srp72	BC158784	B0BND9	B0BND9_RAT	B0BND9_RAT Protein Srp72 OS=Rattus norvegicus (Rat) GN=Srp72 PE=1 SV=1	Srp72	498351	Protein Srp72	9.49859	0.0614561	9.75379	0.0187941	10.1539	0.0463212	1.19351	1.24652	1.57494	1.61875	1.31959	1.29925	0.550877	0.335455	0.000143247	0.017	0.0001	0.0017
10704372	---	ENSRNOT00000029823	---	---	---	---	---	---	6.57992	0.0296912	6.59458	0.211824	6.6821	0.0827525	1.01021		1.0734		1.06254		0.712026	0.0916963	0.838624	0.9972	0.8486	0.8822
10704374	---	XR_008914	---	---	---	---	---	---	3.01393	0.024934	2.94654	0.061466	2.9835	0.0217681	0.954362		0.979123		1.02594		0.139962	0.331381	0.540656	0.5129	0.8624	0.8037
10704376	---	ENSRNOT00000039628	---	---	---	---	---	---	4.36788	0.0360028	4.37256	0.0337076	4.43195	0.0637641	1.00325		1.04541		1.04203		0.548176	0.68369	0.56203	0.9942	0.5905	0.6481
10704380	---	ENSRNOT00000013436	---	---	---	---	---	---	4.87267	0.139616	4.87491	0.139621	4.78162	0.063469	1.00155		0.938834		0.93738		0.110391	0.580357	0.828547	0.9998	0.8602	0.8507
10704383	Zfp541	NM_001107458	D3Z8I0	D3Z8I0_RAT	D3Z8I0_RAT Protein Zfp541 OS=Rattus norvegicus (Rat) GN=Zfp541 PE=4 SV=1	Zfp541	308108	Protein Zfp541	5.90636	0.014411	5.9371	0.0111733	5.91488	0	1.02153	1.02153	1.00593	1.00593	0.984722	0.984722	0.0836973	0	0.205262	0.2291	0.9767	0.2954
10704405	---	XM_238082	---	---	---	---	---	---	4.32663	0.0428672	4.26059	0.0452189	4.29116	0.0867845	0.955255		0.97571		1.02141		0.846358	0.559703	0.77727	0.7588	0.9378	0.9239
10704411	---	ENSRNOT00000057592	---	---	---	---	---	---	8.74359	0.0925568	8.98902	0.144017	8.95166	0.030927	1.18544		1.15514		0.974438		0.508781	0.221998	0.249765	0.2636	0.3697	0.9569
10704413	Napa	NM_080585	P54921	SNAA_RAT	SNAA_RAT Alpha-soluble NSF attachment protein OS=Rattus norvegicus (Rat) GN=Napa PE=1 SV=2	Napa	140673	Alpha-soluble NSF attachment protein	9.55454	0.0758921	9.45703	0.197294	9.57706	0.141818	0.934643	0.934643	1.01573	1.01573	1.08676	1.08676	0.782859	0.518355	0.832861	0.8891	0.993	0.8359
10704424	Kptn	NM_001107457	B2RYG4	B2RYG4_RAT	B2RYG4_RAT Kaptin (Actin binding protein) (Predicted), isoform CRA_a OS=Rattus norvegicus (Rat) GN=Kptn PE=1 SV=1	Kptn	308107	Kaptin (Actin binding protein) (Predicted), isoform CRA_a	6.79071	0.0340309	6.92656	0.0780835	6.48719	0.140889	1.09874	1.09874	0.810271	0.810271	0.737455	0.737455	0.121117	0.268437	0.0443551	0.6012	0.1443	0.0409
10704437	Slc8a2	NM_078619	P48768	NAC2_RAT	NAC2_RAT Sodium/calcium exchanger 2 OS=Rattus norvegicus (Rat) GN=Slc8a2 PE=1 SV=1	Slc8a2	140447	Sodium/calcium exchanger 2	5.81661	0.0459168	5.60737	0.0762336	5.7214	0.011176	0.864991	0.864991	0.936136	0.936136	1.08225	1.08225	0.287626	0.108437	0.078577	0.0674	0.4344	0.3533
10704452	Meis3	NM_001108472	D4A9U2	D4A9U2_RAT	D4A9U2_RAT Meis1, myeloid ecotropic viral integration site 1 homolog 3 (Mouse) (Predicted) OS=Rattus norvegicus (Rat) GN=Meis3 PE=4 SV=1	Meis3	361514	Meis1, myeloid ecotropic viral integration site 1 homolog 3 (Mouse) (Predicted)	5.6279	0.0829133	5.66181	0.05302	5.58467	0.107576	1.02378	1.02378	0.970478	0.970478	0.947932	0.947932	0.25813	0.693091	0.804571	0.9497	0.9306	0.7881
10704467	Zc3h4	XM_001053214	D3ZVW3	D3ZVW3_RAT	D3ZVW3_RAT Protein Zc3h4 OS=Rattus norvegicus (Rat) GN=Zc3h4 PE=1 SV=2	Zc3h4	678741	Protein Zc3h4	7.96525	0.0592021	8.37455	0.102787	9.20108	0.132968	1.32804	1.32804	2.35517	2.35517	1.77342	1.77342	0.360472	0.622147	0.00040133	0.0677	0.0004	0.0031
10704482	Tmem160	NM_001106227	D3ZZU4	D3ZZU4_RAT	D3ZZU4_RAT Protein Tmem160 OS=Rattus norvegicus (Rat) GN=Tmem160 PE=1 SV=1	Tmem160	292654	Protein Tmem160	7.91981	0.0513185	7.78492	0.0537269	6.92736	0.123749	0.910735	0.910735	0.502624	0.502624	0.551888	0.551888	0.0423746	0.433204	0.000308131	0.5347	0.0004	0.0008
10704486	Gng5	ENSRNOT00000058172	P63219	GBG5_RAT	GBG5_RAT Guanine nucleotide-binding protein G(I)/G(S)/G(O) subunit gamma-5 OS=Rattus norvegicus (Rat) GN=Gng5 PE=3 SV=1	Gng5	79218	Guanine nucleotide-binding protein G(I)/G(S)/G(O) subunit gamma-5	9.77126	0.0521429	9.50321	0.194101	9.05699	0.049728	0.830441	0.832869	0.609515	0.745313	0.733965	0.801315	0.23214	0.134575	0.015478	0.3263	0.0133	0.086
10704488	---	ENSRNOT00000058154	---	---	---	---	---	---	5.19601	0.0490041	5.19903	0.0742376	5.26351	0.00431455	1.0021		1.0479		1.04571		0.000565415	0.0196811	0.570276	1	0.6245	0.6245
10704499	Ap2s1	NM_022952	P62744	AP2S1_RAT	AP2S1_RAT AP-2 complex subunit sigma OS=Rattus norvegicus (Rat) GN=Ap2s1 PE=1 SV=1	Ap2s1	65046	AP-2 complex subunit sigma	8.32856	0.107842	8.12305	0.20381	7.83176	0.0886952	0.867228	0.867228	0.708675	0.708675	0.817172	0.817172	0.332369	0.521083	0.120806	0.5889	0.1066	0.381
10704505	Slc1a5	NM_175758	Q9Z1J7	Q9Z1J7_RAT	Q9Z1J7_RAT Amino acid transporter OS=Rattus norvegicus (Rat) GN=Slc1a5 PE=2 SV=1	Slc1a5	292657	Amino acid transporter	5.61425	0.067365	5.60087	0.0169689	5.5225	0.0210637	0.990767	0.990767	0.93838	0.93838	0.947125	0.947125	0.366445	0.146273	0.289352	0.971	0.3084	0.4037
10704517	Strn4	NM_001107480	F1M6V8	F1M6V8_RAT	F1M6V8_RAT Protein Strn4 OS=Rattus norvegicus (Rat) GN=Strn4 PE=1 SV=1	Strn4	308392	Protein Strn4	6.98715	0.06649	7.20007	0.0777963	7.34343	0.0588613	1.15903	1.15903	1.28012	1.28012	1.10447	1.10447	0.902278	0.927749	0.0267616	0.1408	0.0229	0.3658
10704536	Prkd2	NM_001013895	Q5XIS9	KPCD2_RAT	KPCD2_RAT Serine/threonine-protein kinase D2 OS=Rattus norvegicus (Rat) GN=Prkd2 PE=1 SV=1	Prkd2	292658	Serine/threonine-protein kinase D2	6.22386	0.105442	6.51838	0.195831	6.57741	0.0815652	1.22648	1.22648	1.2777	1.2777	1.04176	1.04176	0.919756	0.489801	0.226751	0.3512	0.2369	0.9436
10704555	---	ENSRNOT00000043203	---	---	---	---	---	---	6.22644	0.0744126	6.11728	0.148836	6.03865	0.0293166	0.927126		0.877951		0.94696		0.85648	0.190325	0.431723	0.7023	0.4059	0.8462
10704560	Gng8	NM_139185	P63077	GBG8_RAT	GBG8_RAT Guanine nucleotide-binding protein G(I)/G(S)/G(O) subunit gamma-8 OS=Rattus norvegicus (Rat) GN=Gng8 PE=2 SV=1	Gng8	245986	Guanine nucleotide-binding protein G(I)/G(S)/G(O) subunit gamma-8	5.86649	0.0460885	5.83789	0.0590068	5.83881	0.00427682	0.980368	0.980368	0.980998	0.980998	1.00064	1.00064	0.276742	0.0644224	0.87656	0.886	0.9084	0.9985
10704565	Ptgir	NM_001077644	P43253	PI2R_RAT	PI2R_RAT Prostacyclin receptor OS=Rattus norvegicus (Rat) GN=Ptgir PE=1 SV=1	Ptgir	292661	Prostacyclin receptor	5.85848	0.0693378	6.06058	0.0398225	6.00294	0.0552157	1.15037	1.15037	1.10532	1.10532	0.960838	0.960838	0.478925	0.837142	0.0969279	0.0928	0.2308	0.7627
10704571	Pnmal2	NM_001107481	D3ZQN3	D3ZQN3_RAT	D3ZQN3_RAT Protein Pnmal2 OS=Rattus norvegicus (Rat) GN=Pnmal2 PE=4 SV=1	Pnmal2	308393	Protein Pnmal2	6.3895	0.0875098	6.21163	0.0310663	5.81942	0.07414	0.884011	0.884011	0.673582	0.673582	0.761961	0.761961	0.638712	0.452065	0.00259889	0.2202	0.0023	0.0149
10704573	Pnmal1	NM_001108473	D3ZA53	D3ZA53_RAT	D3ZA53_RAT Protein Pnmal1 OS=Rattus norvegicus (Rat) GN=Pnmal1 PE=4 SV=1	Pnmal1	361515	Protein Pnmal1	4.34124	0.0806181	4.53249	0.175245	4.14888	0.112524	1.14175	1.14175	0.875174	0.875174	0.76652	0.76652	0.190456	0.616965	0.186075	0.5641	0.5743	0.165
10704576	---	ENSRNOT00000058105	---	---	---	---	---	---	4.01915	0.0473382	4.12143	0.0749656	4.17448	0.183646	1.07347		1.11367		1.03745		0.0238691	0.227803	0.650394	0.804	0.6364	0.9518
10704578	Ccdc8	NM_001009533	P62521	CCDC8_RAT	CCDC8_RAT Coiled-coil domain-containing protein 8 OS=Rattus norvegicus (Rat) GN=Ccdc8 PE=1 SV=1	Ccdc8	494320	Coiled-coil domain-containing protein 8	5.60114	0.0982998	5.80079	0.214523	5.61439	0.0505986	1.14842	1.14842	1.00922	1.00922	0.878792	0.878792	0.0544332	0.212596	0.562242	0.6033	0.9986	0.632
10704583	Cgm4	NM_012525	Q4V8J0	Q4V8J0_RAT	Q4V8J0_RAT Carcinoembryonic antigen gene family 4 OS=Rattus norvegicus (Rat) GN=Cgm4 PE=2 SV=2	Cgm4	24257	Carcinoembryonic antigen gene family 4	4.4314	0.0593089	4.56959	0.0737364	4.44254	0	1.10052	1.10052	1.00776	1.00776	0.915706	0.915706	0.2012	0	0.226011	0.2603	0.9909	0.3044
10704589	Ceacam3	NM_012702	Q4KLZ7	Q4KLZ7_RAT	Q4KLZ7_RAT Carcinoembryonic antigen-related cell adhesion molecule 3 OS=Rattus norvegicus (Rat) GN=Ceacam3 PE=2 SV=1	Ceacam3	24926	Carcinoembryonic antigen-related cell adhesion molecule 3	3.1788	0.0224294	3.18113	0.0513437	3.27886	0.0719848	1.00161	0.997296	1.07181	1.0583	1.07009	1.06113	0.0825118	0.474576	0.355579	1	0.4165	0.4165
10704597	Ceacam3	NM_012702	Q4KLZ7	Q4KLZ7_RAT	Q4KLZ7_RAT Carcinoembryonic antigen-related cell adhesion molecule 3 OS=Rattus norvegicus (Rat) GN=Ceacam3 PE=2 SV=1	Ceacam3	24926	Carcinoembryonic antigen-related cell adhesion molecule 3	4.33335	0.00234533	4.32319	0.00781833	4.39656	0.065553	0.99298	0.997296	1.04479	1.0583	1.05217	1.06113	4.02826e-06	0.00246917	0.405144	0.9818	0.5182	0.4268
10704611	Psgb1	NM_021677	Q9Z1D6	Q9Z1D6_RAT	Q9Z1D6_RAT Pregnancy-specific beta 1-glycoprotein OS=Rattus norvegicus (Rat) GN=Psgb1 PE=2 SV=1	Psgb1	59313	Pregnancy-specific beta 1-glycoprotein	3.69154	0.045836	3.71703	0.078073	3.70836	0.0200126	1.01782	1.01782	1.01173	1.01173	0.994012	0.994012	0.648764	0.29299	0.952447	0.9507	0.9744	0.9958
10704618	---	XR_008986	---	---	---	---	---	---	4.01685	0.01612	3.97299	0.0121034	3.99413	0	0.970059		0.984375		1.01476		0.112848	0	0.0897717	0.0781	0.3356	0.5153
10704627	LOC102557244	ENSRNOT00000058040	D3ZT23	D3ZT23_RAT	D3ZT23_RAT Protein LOC102557244 OS=Rattus norvegicus (Rat) GN=LOC102557244 PE=4 SV=3	LOC102557244	102557244	Protein LOC102557244	4.32649	0.0125953	4.40231	0.0694942	4.27961	0.0558579	1.05396	1.05396	0.968028	0.968028	0.918469	0.918469	0.028187	0.189584	0.312545	0.5825	0.8089	0.2907
10704634	Ceacam11	NM_001025404	Q4QQU3	Q4QQU3_RAT	Q4QQU3_RAT Carcinoembryonic antigen-related cell adhesion molecule 11 OS=Rattus norvegicus (Rat) GN=Ceacam11 PE=2 SV=1	Ceacam11	292668	Carcinoembryonic antigen-related cell adhesion molecule 11	3.14366	0.0106347	3.20214	0.054025	3.13141	0.0167047	1.04137	1.04137	0.991543	0.991543	0.952156	0.952156	0.000504656	0.137404	0.335754	0.4523	0.9751	0.3554
10704639	---	ENSRNOT00000042613	---	---	---	---	---	---	5.47099	0.005346	5.54127	0.0557732	5.43764	0.0386917	1.04992		0.977152		0.930689		0.00921889	0.0997225	0.23737	0.4576	0.8217	0.2238
10704642	Mill1	NM_001011931	Q60I18	Q60I18_RAT	Q60I18_RAT MHC class I-like located near the LRC, 1 OS=Rattus norvegicus (Rat) GN=Mill1 PE=2 SV=1	Mill1	292671	MHC class I-like located near the LRC, 1	5.62558	0.110664	5.88162	0.050027	5.96221	0.0904099	1.1942	1.1942	1.2628	1.2628	1.05745	1.05745	0.56265	0.600339	0.0788949	0.1783	0.0787	0.803
10704650	---	XR_008996	---	---	---	---	---	---	4.69319	0.031766	4.7557	0.0307463	4.77468	0.027834	1.04428		1.05811		1.01324		0.0867795	0.982934	0.21752	0.3759	0.2161	0.8926
10704652	LOC680058	ENSRNOT00000034790	D4A315	D4A315_RAT	D4A315_RAT Protein LOC680058 OS=Rattus norvegicus (Rat) GN=LOC680058 PE=4 SV=2	LOC680058	---	Protein LOC680058	2.96426	0.0160572	3.0425	0.0469348	2.91104	0.036802	1.05573	1.05573	0.963782	0.963782	0.912904	0.912904	0.796288	0.490089	0.100866	0.3296	0.5796	0.089
10704655	---	ENSRNOT00000032080	---	---	---	---	---	---	7.83233	0.0835074	7.50247	0.113794	8.01313	0.122319	0.795614		1.13351		1.42469		0.888534	0.897497	0.0393274	0.1605	0.4822	0.0346
10704657	---	ENSRNOT00000031892	---	---	---	---	---	---	6.59354	0.114598	6.44723	0.0554179	6.41248	0.102292	0.903557		0.882055		0.976203		0.47404	0.636033	0.412802	0.5491	0.4223	0.9664
10704659	Micb	NM_001017468	Q60I19	Q60I19_RAT	Q60I19_RAT MHC class I-like located near the LRC, 2 OS=Rattus norvegicus (Rat) GN=Micb PE=2 SV=1	Micb	365212	MHC class I-like located near the LRC, 2	4.39415	0.0187919	4.40745	0.0240113	4.3633	0.103733	1.00926	1.00926	0.978848	0.978848	0.969862	0.969862	0.0150168	0.0637138	0.883014	0.9875	0.9387	0.8776
10704665	Pglyrp1	NM_053373	Q9JLN4	PGRP1_RAT	PGRP1_RAT Peptidoglycan recognition protein 1 OS=Rattus norvegicus (Rat) GN=Pglyrp1 PE=1 SV=1	Pglyrp1	84387	Peptidoglycan recognition protein 1	5.80105	0.0379869	5.83428	0.046634	5.86482	0.0295569	1.0233	1.0233	1.04519	1.04519	1.0214	1.0214	0.235168	0.880843	0.5553	0.8552	0.5271	0.8254
10704669	---	ENSRNOT00000039762	---	---	---	---	---	---	6.13597	0.146268	6.20506	0.0328528	5.90836	0.0654008	1.04906		0.854049		0.814109		0.882481	0.196244	0.143746	0.8643	0.2763	0.1437
10704674	Nanos2	NM_001108908	D4A4B3	D4A4B3_RAT	D4A4B3_RAT Protein Nanos2 OS=Rattus norvegicus (Rat) GN=Nanos2 PE=4 SV=1	Nanos2	365213	Protein Nanos2	5.46666	0.0956137	5.37953	0.0705515	5.44661	0.0343557	0.941397	0.941397	0.986199	0.986199	1.04759	1.04759	0.564909	0.529224	0.663368	0.6639	0.9786	0.7752
10704676	Mypop	NM_001109139	D4AB13	D4AB13_RAT	D4AB13_RAT Protein Mypop OS=Rattus norvegicus (Rat) GN=Mypop PE=4 SV=1	Mypop	499090	Protein Mypop	6.48427	0.032359	6.42362	0.175907	6.00012	0.0903976	0.958833	0.958833	0.714921	0.714921	0.745616	0.745616	0.967632	0.162203	0.0472353	0.9357	0.0559	0.0867
10704680	Irf2bp1	NM_001107483	D4AAZ8	D4AAZ8_RAT	D4AAZ8_RAT Interferon regulatory factor 2 binding protein 1 (Predicted) OS=Rattus norvegicus (Rat) GN=Irf2bp1 PE=1 SV=1	Irf2bp1	308404	Interferon regulatory factor 2 binding protein 1 (Predicted)	6.34958	0.0198453	6.52596	0.128567	5.93811	0.0701587	1.13004	1.13004	0.751857	0.751857	0.665336	0.665336	0.42333	0.131869	0.00716232	0.3588	0.0335	0.0065
10704682	Sympk	ENSRNOT00000019814	F1LSH0	F1LSH0_RAT	F1LSH0_RAT Protein Sympk OS=Rattus norvegicus (Rat) GN=Sympk PE=1 SV=2	Sympk	292683	Protein Sympk	7.60946	0.0980881	7.88344	0.100846	8.06317	0.110581	1.20914	1.20914	1.36956	1.36956	1.13267	1.13267	0.753458	0.987615	0.0554209	0.2337	0.048	0.4678
10704710	Rsph6a	NM_001024748	Q4V8E8	Q4V8E8_RAT	Q4V8E8_RAT Protein Rsph6a OS=Rattus norvegicus (Rat) GN=Rsph6a PE=2 SV=1	Rsph6a	292684	Protein Rsph6a	5.55182	0.0351987	5.57978	0.0323981	5.51328	0.0113657	1.01957	1.01957	0.973641	0.973641	0.95495	0.95495	0.04242	0.266585	0.355396	0.7944	0.6564	0.3292
10704719	---	ENSRNOT00000057936	---	---	---	---	---	---	7.21202	0.0287845	7.73996	0.0901871	7.74173	0.0914492	1.44187		1.44364		1.00123		0.0850049	0.321385	0.00367827	0.0061	0.0061	1
10704728	Dmpk	NM_001107484	D3ZYV4	D3ZYV4_RAT	D3ZYV4_RAT Protein Dmpk OS=Rattus norvegicus (Rat) GN=Dmpk PE=4 SV=3	Dmpk	308405	Protein Dmpk	12.0113	0.0865755	11.7689	0.0521419	11.1202	0.0559735	0.845357	0.845357	0.539188	0.539188	0.637822	0.637822	0.165222	0.748618	0.000204175	0.0955	0.0002	0.0011
10704746	Six5	NM_001107485	A0A0G2K7K3	A0A0G2K7K3_RAT	A0A0G2K7K3_RAT Protein Six5 OS=Rattus norvegicus (Rat) GN=Six5 PE=1 SV=1	Six5	308406	Protein Six5	6.65272	0.0381803	6.68761	0.06415	6.60643	0.0637003	1.02447	1.02447	0.968425	0.968425	0.945289	0.945289	0.879572	0.769672	0.63067	0.8932	0.8551	0.6051
10704752	Fbxo46	NM_001025642	Q4KLY2	FBX46_RAT	FBX46_RAT F-box only protein 46 OS=Rattus norvegicus (Rat) GN=Fbxo46 PE=2 SV=1	Fbxo46	292686	F-box only protein 46	6.18985	0.0709304	6.2904	0.0363954	6.44148	0.0971415	1.07218	1.07218	1.19055	1.19055	1.1104	1.1104	0.742865	0.501164	0.126573	0.6324	0.113	0.3672
10704755	Snrpd2	NM_001109399	B5DES0	B5DES0_RAT	B5DES0_RAT Protein Snrpd2 OS=Rattus norvegicus (Rat) GN=Snrpd2 PE=1 SV=1	Snrpd2	680309	Protein Snrpd2	8.29909	0.0886724	8.00294	0.132558	8.06737	0.0861529	0.814421	0.814421	0.851623	0.851623	1.04568	1.04568	0.666955	0.798922	0.190809	0.1938	0.3273	0.9062
10704758	Eml2	NM_138921	Q6P6T4	EMAL2_RAT	EMAL2_RAT Echinoderm microtubule-associated protein-like 2 OS=Rattus norvegicus (Rat) GN=Eml2 PE=1 SV=1	Eml2	192360	Echinoderm microtubule-associated protein-like 2	6.11812	0.0204236	6.21761	0	6.34538	0.0444136	1.0714	1.0714	1.17062	1.17062	1.0926	1.0926	0.705875	0	0.00251556	0.0726	0.002	0.0337
10704784	---	rno-mir-330	---	---	---	---	---	---	5.94063	0.0270263	5.94933	0.0155111	5.99431	0.0135166	1.00604		1.03791		1.03167		0.184726	0.568288	0.212081	0.967	0.2312	0.3128
10704786	Gpr4	NM_001025680	Q4KLH9	GPR4_RAT	GPR4_RAT G-protein coupled receptor 4 OS=Rattus norvegicus (Rat) GN=Gpr4 PE=2 SV=1	Gpr4	308408	G-protein coupled receptor 4	6.70548	0.0907369	7.04459	0.175175	6.73454	0.0386534	1.26497	1.26497	1.02035	1.02035	0.806617	0.806617	0.043017	0.218467	0.154	0.1793	0.982	0.2253
10704788	Opa3	NM_001107486	B5DF67	B5DF67_RAT	B5DF67_RAT Optic atrophy 3 (Autosomal recessive, with chorea and spastic paraplegia) (Predicted) OS=Rattus norvegicus (Rat) GN=Opa3 PE=2 SV=1	Opa3	308409	Optic atrophy 3 (Autosomal recessive, with chorea and spastic paraplegia) (Predicted)	7.08695	0.0669083	6.91465	0.0784357	6.87191	0.0381634	0.887428	0.887428	0.861525	0.861525	0.970811	0.970811	0.484708	0.653728	0.114449	0.2128	0.1198	0.8953
10704792	---	ENSRNOT00000052888	---	---	---	---	---	---	4.75986	0.059664	4.91133	0.12847	4.97016	0.0226551	1.1107		1.15693		1.04162		0.575809	0.129556	0.256629	0.4409	0.2499	0.8814
10704794	Rtn2	NM_201562	Q6WN19	Q6WN19_RAT	Q6WN19_RAT Reticulon OS=Rattus norvegicus (Rat) GN=Rtn2 PE=1 SV=1	Rtn2	308410	Reticulon	8.55021	0.0496617	8.41987	0.117571	7.86701	0.0349309	0.913615	0.913615	0.622783	0.622783	0.681669	0.681669	0.16025	0.285315	0.00169539	0.4792	0.0018	0.0056
10704808	Ercc1	NM_001106228	D3ZAQ9	D3ZAQ9_RAT	D3ZAQ9_RAT Excision repair cross-complementing rodent repair deficiency, complementation group 1 (Predicted), isoform CRA_a OS=Rattus norvegicus (Rat) GN=Ercc1 PE=4 SV=1	Ercc1	292673	Excision repair cross-complementing rodent repair deficiency, complementation group 1 (Predicted), isoform CRA_a	8.18498	0.0758142	8.33646	0.143694	8.29415	0.0493324	1.11071	1.11071	1.07861	1.07861	0.971099	0.971099	0.423148	0.397564	0.561762	0.5544	0.7176	0.9549
10704819	Ppp1r13l	ENSRNOT00000047105	F1LW07	F1LW07_RAT	F1LW07_RAT Protein Ppp1r13l OS=Rattus norvegicus (Rat) GN=Ppp1r13l PE=1 SV=2	Ppp1r13l	686781	Protein Ppp1r13l	6.74733	0.0558879	7.12665	0.0943051	7.15398	0.0330303	1.30073	1.30073	1.32561	1.32561	1.01912	1.01912	0.679549	0.415659	0.00807792	0.0149	0.0114	0.9664
10704831	Ckm	NM_012530	P00564	KCRM_RAT	KCRM_RAT Creatine kinase M-type OS=Rattus norvegicus (Rat) GN=Ckm PE=1 SV=1	Ckm	24265	Creatine kinase M-type	13.5657	0.00136182	13.5567	0.0243416	13.4588	0.024342	0.993756	0.993756	0.928605	0.928605	0.93444	0.93444	0.593432	0.0941761	0.0171631	0.9727	0.0234	0.0304
10704840	Exoc3l2	ENSRNOT00000023451	D4A3V7	D4A3V7_RAT	D4A3V7_RAT Protein Exoc3l2 OS=Rattus norvegicus (Rat) GN=Exoc3l2 PE=4 SV=2	Exoc3l2	686809	Protein Exoc3l2	5.88356	0.0471676	5.82564	0.023603	5.78643	0.0307839	0.960647	0.960647	0.934893	0.934893	0.973191	0.973191	0.332422	0.72616	0.233881	0.5013	0.2147	0.7578
10704849	Trappc6a	NM_001109410	D4A3S0	D4A3S0_RAT	D4A3S0_RAT Protein Trappc6a OS=Rattus norvegicus (Rat) GN=Trappc6a PE=1 SV=2	Trappc6a	680465	Protein Trappc6a	6.49596	0.0626708	6.49094	0.0694053	6.68751	0.0905795	0.996529	0.996529	1.14199	1.14199	1.14597	1.14597	0.0777812	0.89714	0.191313	0.9978	0.2517	0.2329
10704858	---	XM_001057808	---	---	---	---	---	---	4.55943	0.0992053	4.47064	0.0398843	4.25586	0.127726	0.940314		0.810245		0.861675		0.201031	0.404498	0.148559	0.7945	0.1413	0.3211
10704860	Ercc2	ENSRNOT00000024246	D3ZEG9	D3ZEG9_RAT	D3ZEG9_RAT Protein Ercc2 OS=Rattus norvegicus (Rat) GN=Ercc2 PE=1 SV=1	Ercc2	308415	Protein Ercc2	6.6451	0.0367003	6.90465	0.0620392	7.13947	0.0679171	1.1971	1.1971	1.4087	1.4087	1.17676	1.17676	0.818782	0.703151	0.00263467	0.0435	0.0021	0.059
10704882	Ceacam20	ENSRNOT00000026060	D4ADQ8	D4ADQ8_RAT	D4ADQ8_RAT Protein Ceacam20 OS=Rattus norvegicus (Rat) GN=Ceacam20 PE=4 SV=3	Ceacam20	292701	Protein Ceacam20	5.82059	0.00262605	5.81598	0.0168529	5.8114	0.00436733	0.996809	0.996809	0.993654	0.993654	0.996835	0.996835	0.0271019	0	0.88132	1	0.9005	0.9005
10704895	Zfp180	NM_144757	Q62886	Q62886_RAT	Q62886_RAT Cys2/His2 zinc finger protein OS=Rattus norvegicus (Rat) GN=Zfp180 PE=2 SV=1	Zfp180	246279	Cys2/His2 zinc finger protein	9.09228	0.130609	8.79173	0.13305	9.01999	0.102298	0.811943	0.811943	0.951128	0.951128	1.17142	1.17142	0.653393	0.938224	0.270949	0.2704	0.9154	0.4331
10704902	Zfp112	NM_001107487	A0A0G2K9F8	A0A0G2K9F8_RAT	A0A0G2K9F8_RAT Protein Zfp112 OS=Rattus norvegicus (Rat) GN=Zfp112 PE=4 SV=1	Zfp112	308420	Protein Zfp112	5.475	0.0581896	5.49751	0.0434533	5.45022	0.0884612	1.01573	1.01573	0.982974	0.982974	0.967751	0.967751	0.291623	0.625487	0.900676	0.9755	0.9668	0.8915
10704907	Zfp235	ENSRNOT00000026088	D4ADN7	D4ADN7_RAT	D4ADN7_RAT Protein Zfp235 OS=Rattus norvegicus (Rat) GN=Zfp235 PE=4 SV=3	Zfp235	---	Protein Zfp235	4.89467	0.0411	4.71317	0.0906693	4.58156	0.0786544	0.881785	0.881785	0.804901	0.804901	0.912809	0.912809	0.570346	0.618606	0.0652018	0.2773	0.0562	0.4623
10704912	Rab12	ENSRNOT00000026177	D4A376	D4A376_RAT	D4A376_RAT Ras-related protein Rab-12 OS=Rattus norvegicus (Rat) GN=Rab12 PE=1 SV=3	Rab12	25530	Ras-related protein Rab-12	8.84386	0.02443	9.43123	0.205377	9.12947	0.125271	1.5025	1.5025	1.21893	1.21893	0.811264	0.811264	0.228931	0.0843873	0.0662069	0.0564	0.3795	0.344
10704914	---	ENSRNOT00000034948	---	---	---	---	---	---	5.98313	0.016796	6.02416	0.0906296	5.92954	0.0435238	1.02885		0.963535		0.936515		0.084722	0.131864	0.587118	0.9016	0.8066	0.5628
10704916	Hmgb1	BC088402	P63159	HMGB1_RAT	HMGB1_RAT High mobility group protein B1 OS=Rattus norvegicus (Rat) GN=Hmgb1	Hmgb1	25459	High mobility group protein B1	10.5715	0.0617189	10.6991	0.0416246	10.8211	0.009719	1.09251	1.09216	1.18891	1.18538	1.08824	1.08467	0.552373	0.155223	0.0183952	0.1823	0.0151	0.1823
10704918	---	ENSRNOT00000030433	---	---	---	---	---	---	6.43513	0.0657189	6.5289	0.0155507	6.45349	0.0789769	1.06715		1.0128		0.949069		0.0100022	0.224571	0.562207	0.5707	0.9791	0.6811
10704921	Lypd5	ENSRNOT00000026288	D4A9M5	D4A9M5_RAT	D4A9M5_RAT Protein Lypd5 OS=Rattus norvegicus (Rat) GN=Lypd5 PE=4 SV=1	Lypd5	502308	Protein Lypd5	5.83848	0.0516727	5.83059	0	5.80546	0.0438992	0.994541	0.994541	0.97737	0.97737	0.982735	0.982735	0.180665	0	0.857577	0.9923	0.8577	0.9104
10704927	Kcnn4	NM_023021	A1A5N3	A1A5N3_RAT	A1A5N3_RAT Intermediate conductance K channel isoform 4b OS=Rattus norvegicus (Rat) GN=Kcnn4 PE=2 SV=1	Kcnn4	65206	Intermediate conductance K channel isoform 4b	5.4043	0.0749549	5.25223	0.0619975	5.09565	0.0819061	0.899958	0.899958	0.807398	0.807398	0.89715	0.89715	0.719516	0.949567	0.0683043	0.3668	0.0582	0.3668
10704941	Smg9	NM_001014243	Q5PQS6	SMG9_RAT	SMG9_RAT Protein SMG9 OS=Rattus norvegicus (Rat) GN=Smg9 PE=1 SV=1	Smg9	365215	Protein SMG9	6.84155	0.0774031	6.81389	0.158039	6.93025	0.083775	0.981016	0.981016	1.06342	1.06342	1.08399	1.08399	0.640017	0.569333	0.754779	0.9847	0.8427	0.7542
10704956	Plaur	NM_134352	P49616	UPAR_RAT	UPAR_RAT Urokinase plasminogen activator surface receptor OS=Rattus norvegicus (Rat) GN=Plaur PE=2 SV=2	Plaur	50692	Urokinase plasminogen activator surface receptor	6.38183	0.0618591	6.41829	0.0889558	6.42803	0.0213383	1.02559	1.02559	1.03255	1.03255	1.00678	1.00678	0.329565	0.22443	0.879444	0.9258	0.8789	0.993
10704960	Cadm4	NM_001047107	Q1WIM1	CADM4_RAT	CADM4_RAT Cell adhesion molecule 4 OS=Rattus norvegicus (Rat) GN=Cadm4 PE=1 SV=1	Cadm4	365216	Cell adhesion molecule 4	5.11588	0.131596	5.08827	0.0253796	5.11507	0.0296922	0.981046	0.981046	0.999438	0.999438	1.01875	1.01875	0.104997	0.0754273	0.963341	0.9696	1	0.9696
10704969	Zfp428	NM_001108476	D4A7Q6	D4A7Q6_RAT	D4A7Q6_RAT Protein Zfp428 OS=Rattus norvegicus (Rat) GN=Zfp428 PE=4 SV=2	Zfp428	361519	Protein Zfp428	5.09715	0.0368687	4.79395	0.113216	4.72045	0.0773295	0.810455	0.810455	0.770197	0.770197	0.950326	0.950326	0.413936	0.445727	0.0419476	0.0963	0.0443	0.8138
10704974	---	ENSRNOT00000026881	---	---	---	---	---	---	5.81128	0.0360007	5.88323	0.0252754	5.89732	0.0617113	1.05113		1.06145		1.00982		0.183669	0.502683	0.39048	0.5316	0.3984	0.9611
10704979	Xrcc1	NM_053435	Q9ESZ0	XRCC1_RAT	XRCC1_RAT DNA repair protein XRCC1 OS=Rattus norvegicus (Rat) GN=Xrcc1 PE=1 SV=2	Xrcc1	84495	DNA repair protein XRCC1	8.06157	0.0623412	8.10465	0.0309793	8.29283	0.0741897	1.03031	1.03031	1.17386	1.17386	1.13932	1.13932	0.653458	0.521044	0.0642193	0.8829	0.0696	0.1281
10704996	Ethe1	NM_001106234	B0BNJ4	B0BNJ4_RAT	B0BNJ4_RAT Ethylmalonic encephalopathy 1 OS=Rattus norvegicus (Rat) GN=Ethe1 PE=1 SV=1	Ethe1	292710	Ethylmalonic encephalopathy 1	7.77019	0.0829463	7.98863	0.2226	7.42645	0.142578	1.16347	1.16347	0.787993	0.787993	0.677279	0.677279	0.387585	0.464084	0.117208	0.626	0.3468	0.1046
10705004	---	ENSRNOT00000034460	---	---	---	---	---	---	5.96958	0.00487767	6.0563	0.0464436	5.97669	0.0891331	1.06195		1.00494		0.946314		0.153624	0.0133209	0.523174	0.5597	0.9965	0.6039
10705020	Lypd3	NM_021759	O55162	LYPD3_RAT	LYPD3_RAT Ly6/PLAUR domain-containing protein 3 OS=Rattus norvegicus (Rat) GN=Lypd3 PE=1 SV=1	Lypd3	60378	Ly6/PLAUR domain-containing protein 3	5.22632	0.105042	5.25854	0.0326476	5.14118	0.0387733	1.02258	1.02258	0.94269	0.94269	0.921874	0.921874	0.550105	0.265662	0.485001	0.9467	0.6514	0.4791
10705026	---	XM_001076812	---	---	---	---	---	---	3.50469	0.0468685	3.54945	0.0829413	3.6719	0.111719	1.03151		1.12289		1.08858		0.393707	0.571442	0.418529	0.9223	0.4086	0.6079
10705032	---	XM_001076874	---	---	---	---	---	---	5.54012	0.101243	5.51808	0.0553756	5.48784	0.0796259	0.984841		0.964414		0.979259		0.584561	0.77188	0.909907	0.9774	0.9015	0.9706
10705034	LOC103689942	NM_173339	Q64724	Q64724_RAT	Q64724_RAT C-CAM4 OS=Rattus norvegicus (Rat) GN=LOC103689942 PE=1 SV=1	LOC103689942	287009	C-CAM4	3.13096	0.111744	3.4342	0.159557	3.13255	0.00622715	1.23391	1.23391	1.00111	1.00111	0.811325	0.811325	0.0787246	0.0137169	0.166925	0.2143	1	0.2143
10705037	Ceacam6	NM_001103358	Q6AYP8	Q6AYP8_RAT	Q6AYP8_RAT Ceacam6 protein OS=Rattus norvegicus (Rat) GN=Ceacam6 PE=2 SV=1	Ceacam6	100125369	Ceacam6 protein	4.65158	0.0649323	4.56026	0.0165803	4.58415	0.007311	0.938662	0.938662	0.954336	0.954336	1.0167	1.0167	0.000228941	0.0342667	0.296548	0.2911	0.4772	0.9036
10705049	LOC100910371	NM_001109140	D3ZH91	D3ZH91_RAT	D3ZH91_RAT Protein Dmrtc2 OS=Rattus norvegicus (Rat) GN=LOC100910371 PE=4 SV=1	LOC100910371	499100	Protein Dmrtc2	6.18892	0.01992	6.11966	0.0327487	6.11849	0.0339193	0.953128	0.953128	0.952355	0.952355	0.999189	0.999189	0.0409584	0.790659	0.235099	0.2902	0.2902	1
10705058	Rps19	NM_001037346	P17074	RS19_RAT	RS19_RAT 40S ribosomal protein S19 OS=Rattus norvegicus (Rat) GN=Rps19 PE=2 SV=3	Rps19	29287	40S ribosomal protein S19	8.24681	0.0765638	8.55949	0.153104	8.51886	0.0296726	1.24202	1.24721	1.20752	1.19981	0.972227	0.96193	0.598915	0.183937	0.129704	0.1454	0.2084	0.9569
10705065	Cd79a	ENSRNOT00000027254	F1MAC3	F1MAC3_RAT	F1MAC3_RAT Protein Cd79a OS=Rattus norvegicus (Rat) GN=Cd79a PE=4 SV=3	Cd79a	100913063	Protein Cd79a	5.70548	0.0830824	5.68241	0	5.63556	0.046849	0.984139	0.984139	0.952695	0.952695	0.968048	0.968048	0.0936642	0	0.679871	0.9529	0.665	0.8283
10705071	Arhgef1	NM_021694	Q5BK37	Q5BK37_RAT	Q5BK37_RAT RCG53872, isoform CRA_a OS=Rattus norvegicus (Rat) GN=Arhgef1 PE=2 SV=1	Arhgef1	60323	RCG53872, isoform CRA_a	7.71357	0.0421839	7.78025	0.0153537	7.82924	0.0564813	1.0473	1.0473	1.08347	1.08347	1.03454	1.03454	0.279	0.323746	0.239797	0.538	0.2181	0.726
10705100	Znf574	NM_001024258	Q504L7	ZN574_RAT	ZN574_RAT Zinc finger protein 574 OS=Rattus norvegicus (Rat) GN=Znf574 PE=2 SV=1	Znf574	308434	Zinc finger protein 574	6.36894	0.0652152	6.34737	0.0675173	6.37503	0.0525662	0.985164	0.985164	1.00423	1.00423	1.01935	1.01935	0.104448	0.935847	0.938418	0.9621	0.9968	0.9384
10705104	Cic	NM_001107490	D4A853	D4A853_RAT	D4A853_RAT Protein Cic OS=Rattus norvegicus (Rat) GN=Cic PE=1 SV=2	Cic	308435	Protein Cic	7.23895	0.010934	7.30155	0.0543555	7.26179	0.0658268	1.04435	1.04435	1.01596	1.01596	0.972817	0.972817	0.636651	0.175879	0.659595	0.6463	0.9545	0.8086
10705126	Tmem145	ENSRNOT00000027783	D3Z9I0	D3Z9I0_RAT	D3Z9I0_RAT Protein Tmem145 OS=Rattus norvegicus (Rat) GN=Tmem145 PE=4 SV=3	Tmem145	292722	Protein Tmem145	5.30134	0.0416012	5.28658	0.0145272	5.34255	0.129764	0.989819	0.989819	1.02898	1.02898	1.03956	1.03956	0.0535278	0.0357672	0.887945	0.9876	0.942	0.8825
10705142	---	ENSRNOT00000027831	---	---	---	---	---	---	6.96021	0.222191	6.96761	0.0422151	6.71073	0.139415	1.00514		0.841201		0.836896		0.582873	0.206171	0.449662	0.9995	0.5182	0.502
10705184	4732471J01Rik	ENSRNOT00000027854	D3Z8F4	D3Z8F4_RAT	D3Z8F4_RAT Protein 4732471J01Rik OS=Rattus norvegicus (Rat) GN=4732471J01Rik PE=4 SV=2	4732471J01Rik	---	Protein 4732471J01Rik	6.96961	0.0568243	7.47829	0.0823583	6.79314	0.173607	1.42276	1.42276	0.884869	0.884869	0.62194	0.62194	0.637218	0.344549	0.013737	0.0453	0.5796	0.0135
10705188	---	ENSRNOT00000032323	---	---	---	---	---	---	6.50591	0.117524	6.28876	0.155872	6.23269	0.108756	0.860263		0.827472		0.961882		0.475089	0.879898	0.348738	0.4922	0.356	0.9543
10705192	Atp5sl	NM_001009705	Q5I0I4	AT5SL_RAT	AT5SL_RAT ATP synthase subunit s-like protein OS=Rattus norvegicus (Rat) GN=Atp5sl PE=2 SV=1	Atp5sl	361520	ATP synthase subunit s-like protein	8.52903	0.17581	8.0804	0.00890583	7.77453	0.108446	0.732738	0.732738	0.592753	0.592753	0.808957	0.808957	0.765775	0.0284958	0.0116174	0.0816	0.0098	0.2406
10705198	B3gnt8	NM_001107492	D3ZE36	D3ZE36_RAT	D3ZE36_RAT Protein B3gnt8 OS=Rattus norvegicus (Rat) GN=B3gnt8 PE=4 SV=1	B3gnt8	308440	Protein B3gnt8	5.01914	0.0520071	5.11968	0.0748739	4.87415	0.145428	1.07217	1.07217	0.90438	0.90438	0.843504	0.843504	0.0399768	0.410989	0.28911	0.7687	0.5832	0.2658
10705202	Exosc5	NM_001107493	B2RZ47	B2RZ47_RAT	B2RZ47_RAT Exosc5 protein OS=Rattus norvegicus (Rat) GN=Exosc5 PE=2 SV=1	Exosc5	308441	Exosc5 protein	7.69409	0.0567371	8.42667	0.168728	8.49037	0.0983601	1.6616	1.6616	1.73661	1.73661	1.04514	1.04514	0.336391	0.402685	0.00543141	0.0109	0.0074	0.9241
10705209	B9d2	NM_001107494	P0C5J3	B9D2_RAT	B9D2_RAT B9 domain-containing protein 2 OS=Rattus norvegicus (Rat) GN=B9d2 PE=2 SV=1	B9d2	308443	B9 domain-containing protein 2	5.61099	0.0310559	5.70627	0.0513929	5.69207	0.0316797	1.06828	1.06828	1.05781	1.05781	0.990207	0.990207	0.176659	0.781882	0.258838	0.2784	0.3681	0.9701
10705213	Tgfb1	NM_021578	P17246	TGFB1_RAT	TGFB1_RAT Transforming growth factor beta-1 OS=Rattus norvegicus (Rat) GN=Tgfb1 PE=1 SV=1	Tgfb1	59086	Transforming growth factor beta-1	7.73128	0.056876	7.83447	0.121818	7.45009	0.15007	1.07414	1.07414	0.82291	0.82291	0.766107	0.766107	0.32735	0.542645	0.135446	0.8114	0.2875	0.1309
10705223	---	ENSRNOT00000031948	---	---	---	---	---	---	3.70902	0.0816401	3.78031	0.0888477	3.67547	0.0159943	1.05066		0.977017		0.929907		0.0253975	0.175401	0.585032	0.7725	0.9295	0.5667
10705225	Cyp2b1	BC166502	B2GV28	B2GV28_RAT	B2GV28_RAT Cyp2b1 protein OS=Rattus norvegicus (Rat) GN=Cyp2b1 PE=1 SV=1	Cyp2b1	24300	Cyp2b1 protein	3.2274	0.180142	3.45653	0.0332517	3.69367	0.278395	1.17213	1.17213	1.38153	1.38153	1.17865	1.17865	0.010401	0.0915814	0.301534	0.6976	0.2745	0.6697
10705230	Cyp2b2	ENSRNOT00000028196	F1LSA2	F1LSA2_RAT	F1LSA2_RAT Cytochrome P450 2B2 OS=Rattus norvegicus (Rat) GN=Cyp2b2 PE=1 SV=2	Cyp2b2	361523	Cytochrome P450 2B2	4.02958	0.014839	4.02366	0.00888951	4.14692	0.100627	0.995908	0.995908	1.08474	1.08474	1.08919	1.08919	0.00190576	0.00676231	0.33109	0.9922	0.4204	0.3673
10705235	Cyp2b3	NM_173294	P13107	CP2B3_RAT	CP2B3_RAT Cytochrome P450 2B3 OS=Rattus norvegicus (Rat) GN=Cyp2b3 PE=2 SV=1	Cyp2b3	286953	Cytochrome P450 2B3	4.61524	0.0214937	4.59342	0.0433107	4.66617	0.0212613	0.984991	0.984991	1.03593	1.03593	1.05171	1.05171	0.0337108	0.6047	0.32919	0.8941	0.5284	0.319
10705237	---	GENSCAN00000005525	---	---	---	---	---	---	3.2421	0.0146192	3.35616	0.043016	3.2548	0.016685	1.08227		1.00884		0.932154		0.00843515	0.294334	0.0529205	0.0653	0.9659	0.0897
10705246	Cyp2b12	NM_017156	P33272	CP2BC_RAT	CP2BC_RAT Cytochrome P450 2B12 OS=Rattus norvegicus (Rat) GN=Cyp2b12 PE=2 SV=1	Cyp2b12	29295	Cytochrome P450 2B12	3.20233	0.0294723	3.23414	0.1052	3.13883	0.0545706	1.0223	1.0223	0.956942	0.956942	0.936068	0.936068	0.284025	0.317572	0.642316	0.9293	0.8251	0.6218
10705256	Cyp2b15	ENSRNOT00000002054	F1M6Z6	F1M6Z6_RAT	F1M6Z6_RAT Cytochrome P450 2B15 OS=Rattus norvegicus (Rat) GN=Cyp2b15 PE=3 SV=2	Cyp2b15	685222	Cytochrome P450 2B15	4.32687	0.09393	4.43161	0.110932	4.25731	0.072439	1.0753	1.0753	0.95293	0.95293	0.8862	0.8862	0.28263	0.863229	0.46825	0.7288	0.8612	0.4424
10705266	Cyp2g1	NM_012787	P10610	CP2G1_RAT	CP2G1_RAT Cytochrome P450 2G1 OS=Rattus norvegicus (Rat) GN=Cyp2g1 PE=2 SV=1	Cyp2g1	25251	Cytochrome P450 2G1	4.59209	0.0227323	4.69014	0.0457192	4.57839	0.0586843	1.07033	1.07033	0.990551	0.990551	0.925463	0.925463	0.219198	0.545318	0.253432	0.3545	0.9767	0.2769
10705276	Cyp2a3	NM_012542	P20812	CP2A3_RAT	CP2A3_RAT Cytochrome P450 2A3 OS=Rattus norvegicus (Rat) GN=Cyp2a3 PE=2 SV=1	Cyp2a3	24299	Cytochrome P450 2A3	4.25594	0.0633633	4.308	0.023155	4.28485	0	1.03675	1.03675	1.02024	1.02024	0.984078	0.984078	0.00227005	0	0.690078	0.6668	0.8859	0.911
10705286	Cyp2a1	NM_012692	P11711	CP2A1_RAT	CP2A1_RAT Cytochrome P450 2A1 OS=Rattus norvegicus (Rat) GN=Cyp2a1 PE=1 SV=2	Cyp2a1	24894	Cytochrome P450 2A1	5.016	0.163325	4.87494	0.0959614	4.79068	0.0530186	0.906854	0.906854	0.855408	0.855408	0.94327	0.94327	0.0630746	0.423805	0.420078	0.6782	0.3962	0.8564
10705295	Cyp2a2	NM_012693	P15149	CP2A2_RAT	CP2A2_RAT Cytochrome P450 2A2 OS=Rattus norvegicus (Rat) GN=Cyp2a2 PE=1 SV=1	Cyp2a2	24895	Cytochrome P450 2A2	3.23172	0.0734883	3.05053	0.0370188	3.1192	0.0136047	0.881975	0.881975	0.924966	0.924966	1.04874	1.04874	0.115974	0.158119	0.092765	0.0832	0.2824	0.6218
10705304	Cyp2f2	NM_019303	O35293	CP2F2_RAT	CP2F2_RAT Cytochrome P450 2F2 OS=Rattus norvegicus (Rat) GN=Cyp2f2 PE=2 SV=1	Cyp2f2	54246	Cytochrome P450 2F2	4.79165	0.0336839	4.80456	0.0232141	4.87146	0.0455799	1.00899	1.00899	1.05687	1.05687	1.04746	1.04746	0.714335	0.647136	0.2939	0.9607	0.3074	0.4204
10705313	Cyp2t1	NM_134369	Q91Y29	Q91Y29_RAT	Q91Y29_RAT Cytochrome P450 monooxygenase CYP2T1 OS=Rattus norvegicus (Rat) GN=Cyp2t1 PE=2 SV=1	Cyp2t1	171380	Cytochrome P450 monooxygenase CYP2T1	5.76019	0.0746542	5.87627	0.00999873	6.01093	0.268594	1.08378	1.08378	1.18982	1.18982	1.09784	1.09784	0.208955	0.0070552	0.57858	0.8619	0.5508	0.8406
10705324	---	XM_574398	---	---	---	---	---	---	7.0293	0.0681619	7.07525	0.0480285	7.39195	0.0674258	1.03236		1.28579		1.24548		0.483231	0.871428	0.0115175	0.8403	0.0137	0.0261
10705329	Adck4	NM_001012065	Q6AY19	ADCK4_RAT	ADCK4_RAT AarF domain-containing protein kinase 4 OS=Rattus norvegicus (Rat) GN=Adck4 PE=1 SV=1	Adck4	308453	AarF domain-containing protein kinase 4	6.21227	0.0499052	6.28892	0.0720587	7.05749	0.0577648	1.05456	1.05456	1.79653	1.79653	1.70358	1.70358	0.0178649	0.90149	0.000102041	0.6335	0.0001	0.0002
10705345	Numbl	NM_001033888	Q3MUI2	Q3MUI2_RAT	Q3MUI2_RAT Numb-like OS=Rattus norvegicus (Rat) GN=Numbl PE=2 SV=1	Numbl	292732	Numb-like	7.04714	0.030788	7.04386	0.0281559	7.01754	0.0252043	0.997732	0.997732	0.979691	0.979691	0.981919	0.981919	0.0828406	0.944284	0.790435	0.9965	0.8035	0.8446
10705358	Blvrb	NM_001106236	B5DF65	B5DF65_RAT	B5DF65_RAT Biliverdin reductase B (Flavin reductase (NADPH)) OS=Rattus norvegicus (Rat) GN=Blvrb PE=1 SV=1	Blvrb	292737	Biliverdin reductase B (Flavin reductase (NADPH))	5.85279	0.155353	5.93879	0.0524548	6.38544	0.124394	1.06143	1.06143	1.44659	1.44659	1.36288	1.36288	0.956459	0.44028	0.0409685	0.8672	0.0453	0.0862
10705361	Sertad3	BC091229	Q5BK27	Q5BK27_RAT	Q5BK27_RAT Protein Sertad3 OS=Rattus norvegicus (Rat) GN=Sertad3 PE=2 SV=1	Sertad3	499108	Protein Sertad3	5.3895	0.0784399	5.71759	0.0915961	5.34767	0.0472173	1.25535	1.25535	0.971419	0.971419	0.773825	0.773825	0.190698	0.701887	0.0251867	0.0488	0.9251	0.0309
10705364	Sertad1	NM_001007735	Q6P771	Q6P771_RAT	Q6P771_RAT Protein Sertad1 OS=Rattus norvegicus (Rat) GN=Sertad1 PE=2 SV=1	Sertad1	361526	Protein Sertad1	6.55025	0.0490957	6.83061	0.0601043	6.93732	0.0231933	1.2145	1.2145	1.30774	1.30774	1.07677	1.07677	0.261406	0.537314	0.00321507	0.0141	0.0031	0.3418
10705367	Prx	NM_023976	Q63425	PRAX_RAT	PRAX_RAT Periaxin OS=Rattus norvegicus (Rat) GN=Prx PE=1 SV=2	Prx	78960	Periaxin	6.13063	0.0404892	6.12384	0.145106	6.12165	0.0145467	0.995305	0.995305	0.993799	0.993799	0.998487	0.998487	0.296099	0.0379806	0.996578	0.9996	0.9964	0.9984
10705375	Hipk4	NM_001024776	Q4V793	HIPK4_RAT	HIPK4_RAT Homeodomain-interacting protein kinase 4 OS=Rattus norvegicus (Rat) GN=Hipk4 PE=2 SV=1	Hipk4	308449	Homeodomain-interacting protein kinase 4	4.84001	0.151604	5.23615	0.0240513	5.06563	0.026411	1.31598	1.31598	1.16928	1.16928	0.888523	0.888523	0.118586	0.0372817	0.0545176	0.0467	0.2524	0.4268
10705380	RGD1307554	BC127543	A0JPQ7	CS047_RAT	CS047_RAT Uncharacterized protein C19orf47 homolog OS=Rattus norvegicus (Rat) PE=2 SV=1	RGD1307554	292739	Uncharacterized protein C19orf47 homolog	8.73098	0.0327691	8.48247	0.116467	7.62107	0.0331545	0.841768	0.841768	0.463322	0.463322	0.550416	0.550416	0.0261298	0.161279	9.34742e-05	0.1154	0.0001	0.0004
10705394	Akt2	NM_017093	P47197	AKT2_RAT	AKT2_RAT RAC-beta serine/threonine-protein kinase OS=Rattus norvegicus (Rat) GN=Akt2 PE=1 SV=1	Akt2	25233	RAC-beta serine/threonine-protein kinase	11.066	0.0459789	10.7387	0.135381	10.3964	0.106855	0.797012	0.797012	0.628653	0.628653	0.788763	0.788763	0.488379	0.469398	0.0112124	0.1432	0.0092	0.1274		IGF-1/insulin/GH signaling
10705411	---	ENSRNOT00000057163	---	---	---	---	---	---	8.86459	0.0288954	9.0176	0.0790922	9.06533	0.0803531	1.11189		1.14929		1.03364		0.442127	0.423595	0.17394	0.3172	0.1738	0.8804
10705414	Ttc9b	NM_001108478	D3ZTK0	D3ZTK0_RAT	D3ZTK0_RAT Protein Ttc9b OS=Rattus norvegicus (Rat) GN=Ttc9b PE=4 SV=1	Ttc9b	361528	Protein Ttc9b	5.00403	0.104763	4.9579	0.0319885	4.85357	0.0282921	0.968527	0.968527	0.90096	0.90096	0.930237	0.930237	0.159573	0.173845	0.307347	0.8718	0.2946	0.5196
10705418	---	ENSRNOT00000032991	D3Z9B3	D3Z9B3_RAT	D3Z9B3_RAT Uncharacterized protein OS=Rattus norvegicus (Rat) PE=4 SV=3	---	---	Uncharacterized protein	6.63329	0.0836519	6.83124	0.15577	6.65873	0.107908	1.14707	1.14707	1.01779	1.01779	0.887294	0.887294	0.713429	0.720438	0.476263	0.5025	0.9895	0.5768
10705420	---	ENSRNOT00000023227	---	---	---	---	---	---	12.2565	0.0609805	12.4526	0.0787319	12.468	0.0324853	1.14559		1.15789		1.01074		0.505744	0.594008	0.0883111	0.1341	0.11	0.9869
10705422	LOC100910046	ENSRNOT00000032933	D3ZR88	D3ZR88_RAT	D3ZR88_RAT Protein LOC100910046 OS=Rattus norvegicus (Rat) GN=LOC100910046 PE=4 SV=2	LOC100910046	100910046	Protein LOC100910046	7.04699	0.00700482	7.41557	0.0936431	7.54895	0.0573981	1.29108	1.29108	1.41614	1.41614	1.09687	1.09687	0.084135	0.0604354	0.00351148	0.0149	0.0034	0.3642
10705426	---	ENSRNOT00000044202	---	---	---	---	---	---	8.46858	0.0326155	8.62323	0.0703704	8.46965	0.038006	1.11315		1.00074		0.899017		0.0893605	0.589813	0.12058	0.1556	0.9988	0.165
10705431	---	XM_001077990	---	---	---	---	---	---	6.53261	0.110987	7.00535	0.135291	7.34088	0.108648	1.38774		1.7511		1.26183		0.780507	0.949947	0.00799184	0.0656	0.0066	0.1865
10705436	---	ENSRNOT00000048885	---	---	---	---	---	---	6.63456	0.218686	6.75777	0.0971579	6.60242	0.0551879	1.08915		0.977965		0.897913		0.889239	0.228902	0.736515	0.8207	0.988	0.7408
10705440	---	XR_009190	---	---	---	---	---	---	5.07125	0.0145306	5.09992	0.0941806	5.06034	0.014284	1.02007		0.992463		0.972933		0.0198609	0.0262934	0.869741	0.9225	0.991	0.8677
10705442	Fcgbpl1	BC099756	Q499U7	Q499U7_RAT	Q499U7_RAT RGD1311906 protein OS=Rattus norvegicus (Rat) GN=Fcgbpl1 PE=2 SV=1	Fcgbpl1	292746	RGD1311906 protein	5.16778	0.0428467	5.17707	0.0275984	5.15484	0.0134198	1.00646	1.00646	0.991074	0.991074	0.984709	0.984709	0.20118	0.408258	0.869281	0.9717	0.9504	0.8581
10705485	Fbl	NM_001025643	P22509	FBRL_RAT	FBRL_RAT rRNA 2'-O-methyltransferase fibrillarin OS=Rattus norvegicus (Rat) GN=Fbl PE=1 SV=2	Fbl	292747	rRNA 2'-O-methyltransferase fibrillarin	7.8347	0.0165886	7.71446	0.116779	7.87546	0.0160516	0.920031	0.920031	1.02866	1.02866	1.11807	1.11807	0.0698034	0.0243175	0.323338	0.5023	0.9141	0.3184
10705494	Dyrk1b	NM_001107496	D4ACC4	D4ACC4_RAT	D4ACC4_RAT Dual-specificity tyrosine-(Y)-phosphorylation regulated kinase 1b (Predicted), isoform CRA_a OS=Rattus norvegicus (Rat) GN=Dyrk1b PE=4 SV=2	Dyrk1b	308468	Dual-specificity tyrosine-(Y)-phosphorylation regulated kinase 1b (Predicted), isoform CRA_a	8.50445	0.0224091	8.46077	0.196312	7.5109	0.038562	0.970179	0.970179	0.502241	0.502241	0.517679	0.517679	0.120684	0.0281486	0.0014795	0.9624	0.0023	0.0028
10705507	Eid2	ENSRNOT00000026114	D4ACB5	D4ACB5_RAT	D4ACB5_RAT Protein Eid2 OS=Rattus norvegicus (Rat) GN=Eid2 PE=4 SV=1	Eid2	685691	Protein Eid2	6.62189	0.124833	7.09406	0.142821	7.10893	0.106001	1.38719	1.38719	1.40156	1.40156	1.01036	1.01036	0.750577	0.937883	0.0538065	0.0817	0.0725	0.9951
10705509	---	XR_009205	---	---	---	---	---	---	6.39743	0.12254	6.11895	0.0362109	5.92775	0.122335	0.824462		0.722126		0.875875		0.423351	0.352521	0.047035	0.2165	0.0404	0.4292
10705511	Rps16	ENSRNOT00000026576	P62250	RS16_RAT	RS16_RAT 40S ribosomal protein S16 OS=Rattus norvegicus (Rat) GN=Rps16 PE=1 SV=2	Rps16	140655	40S ribosomal protein S16	10.6671	0.030709	10.7631	0.13315	10.792	0.0453648	1.06877	1.06877	1.09043	1.09043	1.02027	1.02027	0.693493	0.144939	0.571722	0.7021	0.5737	0.9719
10705519	Lrfn1	NM_001127694	P0C7J6	LRFN1_RAT	LRFN1_RAT Leucine-rich repeat and fibronectin type III domain-containing protein 1 OS=Rattus norvegicus (Rat) GN=Lrfn1 PE=1 SV=1	Lrfn1	365222	Leucine-rich repeat and fibronectin type III domain-containing protein 1	6.45982	0.0723947	6.38434	0.0526511	6.18104	0.072571	0.949026	0.949026	0.824285	0.824285	0.868558	0.868558	0.911183	0.911309	0.0639471	0.7505	0.0625	0.1598
10705524	Paf1	NM_001024898	Q4V886	PAF1_RAT	PAF1_RAT RNA polymerase II-associated factor 1 homolog OS=Rattus norvegicus (Rat) GN=Paf1 PE=2 SV=1	Paf1	361531	RNA polymerase II-associated factor 1 homolog	8.70792	0.0572232	8.87386	0.0278485	8.91618	0.0213311	1.12189	1.12189	1.1553	1.1553	1.02977	1.02977	0.147277	0.47102	0.0218154	0.0574	0.0228	0.7343
10705539	Gmfg	NM_181091	Q80T18	GMFG_RAT	GMFG_RAT Glia maturation factor gamma OS=Rattus norvegicus (Rat) GN=Gmfg PE=2 SV=1	Gmfg	113940	Glia maturation factor gamma	8.11777	0.153184	7.78381	0.0168442	7.37434	0.186073	0.793353	0.793353	0.597315	0.597315	0.752899	0.752899	0.600683	0.063207	0.0253147	0.2766	0.0211	0.1737
10705547	---	GENSCAN00000014956	---	---	---	---	---	---	6.55407	0.0386989	6.55637	0.0152208	6.43683	0.0388296	1.00159		0.921949		0.920481		0.752741	0.471534	0.0668822	1	0.0938	0.0938
10705550	Sycn	NM_139086	O35775	SYCN_RAT	SYCN_RAT Syncollin OS=Rattus norvegicus (Rat) GN=Sycn PE=1 SV=2	Sycn	245917	Syncollin	5.30014	0.0486156	5.35834	0.0388584	5.32408	0.00713433	1.04116	1.04116	1.01673	1.01673	0.976535	0.976535	0.377549	0.114349	0.532542	0.5049	0.8622	0.7958
10705553	Fbxo27	BC091204	Q5BK51	Q5BK51_RAT	Q5BK51_RAT RGD1563982 protein OS=Rattus norvegicus (Rat) GN=Fbxo27 PE=2 SV=1	Fbxo27	499114	RGD1563982 protein	5.87618	0.070835	5.86353	0.129015	5.35276	0.100539	0.991267	0.991267	0.69572	0.69572	0.701849	0.701849	0.709526	0.77357	0.0193735	0.993	0.0278	0.0318
10705560	Fbxo17	NM_001013064	Q6AY27	FBX17_RAT	FBX17_RAT F-box only protein 17 OS=Rattus norvegicus (Rat) GN=Fbxo17 PE=2 SV=1	Fbxo17	292757	F-box only protein 17	5.75608	0.0181234	5.73997	0.0119281	5.70156	0.034924	0.988893	0.988893	0.962913	0.962913	0.973728	0.973728	0.0081996	0.32007	0.346277	0.8799	0.3317	0.5637
10705571	Sars2	NM_001106240	D3ZM09	D3ZM09_RAT	D3ZM09_RAT Protein Sars2 OS=Rattus norvegicus (Rat) GN=Sars2 PE=1 SV=1	Sars2	292759	Protein Sars2	7.93552	0.0745958	7.53564	0.0578089	7.13716	0.0198156	0.757921	0.757921	0.575005	0.575005	0.758661	0.758661	0.475248	0.32913	0.000168008	0.0054	0.0001	0.0056		Aminoacyl-tRNA biosynthesis
10705588	Sirt2	NM_001008368	Q5RJQ4	SIR2_RAT	SIR2_RAT NAD-dependent protein deacetylase sirtuin-2 OS=Rattus norvegicus (Rat) GN=Sirt2 PE=1 SV=1	Sirt2	361532	NAD-dependent protein deacetylase sirtuin-2	9.89289	0.0213207	10.1896	0.158776	9.93643	0.0970604	1.22831	1.22831	1.03064	1.03064	0.839068	0.839068	0.0730029	0.115064	0.195043	0.2128	0.9631	0.294
10705606	Rinl	NM_001106241	D3ZP73	D3ZP73_RAT	D3ZP73_RAT Protein Rinl OS=Rattus norvegicus (Rat) GN=Rinl PE=4 SV=1	Rinl	292760	Protein Rinl	5.4864	0.052197	5.48157	0.103639	5.4055	0.0769514	0.996658	0.996658	0.945467	0.945467	0.948637	0.948637	0.878599	0.710732	0.730004	0.9981	0.7542	0.7862
10705618	Hnrnpl	BC086392	F1LQ48	F1LQ48_RAT	F1LQ48_RAT Protein Fblim1 OS=Rattus norvegicus (Rat) GN=Hnrnpl PE=1 SV=2	Hnrnpl	80846	Protein Fblim1	8.53949	0.0125895	8.73759	0.0312302	8.66818	0.0401857	1.14719	1.14719	1.0933	1.0933	0.953028	0.953028	0.306948	0.365126	0.00877567	0.0076	0.0522	0.2764
10705631	Ech1	NM_022594	Q62651	ECH1_RAT	ECH1_RAT Delta(3,5)-Delta(2,4)-dienoyl-CoA isomerase, mitochondrial OS=Rattus norvegicus (Rat) GN=Ech1 PE=1 SV=2	Ech1	64526	Delta(3,5)-Delta(2,4)-dienoyl-CoA isomerase, mitochondrial	10.7264	0.0517736	11.5268	0.121719	10.8204	0.0648908	1.74151	1.74151	1.06727	1.06727	0.612839	0.612839	0.0395958	0.522565	0.00103791	0.0013	0.7451	0.0025
10705642	Lgals4	NM_012975	P38552	LEG4_RAT	LEG4_RAT Galectin-4 OS=Rattus norvegicus (Rat) GN=Lgals4 PE=1 SV=1	Lgals4	25474	Galectin-4	4.15983	0.026929	4.17938	0.0448782	4.11295	0.0199543	1.01364	1.01364	0.968025	0.968025	0.954995	0.954995	0.207435	0.555152	0.367876	0.872	0.5987	0.3501
10705654	Lgals7	NM_022582	P97590	LEG7_RAT	LEG7_RAT Galectin-7 OS=Rattus norvegicus (Rat) GN=Lgals7 PE=2 SV=4	Lgals7	29518	Galectin-7	4.64222	0.0821843	4.50192	0.0114883	4.40384	0.040101	0.907327	0.907327	0.847692	0.847692	0.934274	0.934274	0.12456	0.0761368	0.0524332	0.2244	0.0454	0.4612
10705658	Capn12	NM_001110808	D3ZJZ8	D3ZJZ8_RAT	D3ZJZ8_RAT Protein Capn12 OS=Rattus norvegicus (Rat) GN=Capn12 PE=4 SV=1	Capn12	308476	Protein Capn12	5.41539	0.0105213	5.4295	0	5.41612	0.013378	1.00983	1.00983	1.00051	1.00051	0.99077	0.99077	0.000153893	0	0.522741	0.5284	0.972	0.6545
10705679	Map4k1	NM_001106243	D3Z8I4	D3Z8I4_RAT	D3Z8I4_RAT Mitogen-activated protein kinase kinase kinase kinase OS=Rattus norvegicus (Rat) GN=Map4k1 PE=3 SV=1	Map4k1	292763	Mitogen-activated protein kinase kinase kinase kinase	5.50245	0.17985	5.22948	0.0899156	5.13506	0.0982213	0.827618	0.827618	0.775188	0.775188	0.93665	0.93665	0.204465	0.599469	0.193821	0.3618	0.1891	0.8592
10705712	Rasgrp4	NM_130824	Q8R5I4	GRP4_RAT	GRP4_RAT RAS guanyl-releasing protein 4 OS=Rattus norvegicus (Rat) GN=Rasgrp4 PE=1 SV=1	Rasgrp4	170668	RAS guanyl-releasing protein 4	5.49684	0.0549544	5.22268	0.0588975	5.28431	0.138808	0.82693	0.82693	0.863022	0.863022	1.04365	1.04365	0.939606	0.416788	0.164116	0.1646	0.3016	0.8802
10705729	---	ENSRNOT00000056962	---	---	---	---	---	---	6.3705	0.114754	6.19815	0.0565702	6.15262	0.0394704	0.887397		0.859832		0.968937		0.0233515	0.373301	0.198576	0.3381	0.2013	0.9073
10705731	Ggn	NM_001013065	Q66HC8	GGN_RAT	GGN_RAT Gametogenetin OS=Rattus norvegicus (Rat) GN=Ggn PE=1 SV=1	Ggn	292765	Gametogenetin	5.90603	6.28037e-16	5.92393	0.0329908	5.91251	0.0235108	1.01248	1.01248	1.0045	1.0045	0.992114	0.992114	0.0265308	0	0.880387	0.8709	0.9777	0.9507
10705739	Yif1b	NM_198734	Q6PEC3	YIF1B_RAT	YIF1B_RAT Protein YIF1B OS=Rattus norvegicus (Rat) GN=Yif1b PE=2 SV=2	Yif1b	292768	Protein YIF1B	6.4473	0.0168337	6.33279	0.182466	6.12769	0.0680687	0.923695	0.923695	0.801288	0.801288	0.867481	0.867481	0.451389	0.0452847	0.206154	0.7657	0.1904	0.4461
10705753	Ppp1r14a	NM_130403	Q99MC0	PP14A_RAT	PP14A_RAT Protein phosphatase 1 regulatory subunit 14A OS=Rattus norvegicus (Rat) GN=Ppp1r14a PE=1 SV=1	Ppp1r14a	114004	Protein phosphatase 1 regulatory subunit 14A	6.21436	0.109977	5.96247	0.0512467	5.85056	0.0921119	0.839798	0.839798	0.777115	0.777115	0.925359	0.925359	0.421335	0.661535	0.0641168	0.1838	0.0598	0.6684
10705758	Dpf1	NM_001105729	A0A0H2UHS4	A0A0H2UHS4_RAT	A0A0H2UHS4_RAT Zinc finger protein neuro-d4 OS=Rattus norvegicus (Rat) GN=Dpf1 PE=4 SV=1	Dpf1	50545	Zinc finger protein neuro-d4	4.90606	0.0323482	4.78926	0.124613	4.71808	0.0332862	0.922234	0.922234	0.877836	0.877836	0.951858	0.951858	0.939141	0.144359	0.300293	0.5584	0.2803	0.816
10705772	Zfp84	NM_001107500	D3ZD53	D3ZD53_RAT	D3ZD53_RAT Protein Zfp84 OS=Rattus norvegicus (Rat) GN=Zfp84 PE=4 SV=3	Zfp84	308482	Protein Zfp84	6.14018	0.0477396	6.26241	0.0934326	6.32541	0.074201	1.08842	1.08842	1.137	1.137	1.04463	1.04463	0.863741	0.701949	0.263364	0.5001	0.247	0.8194
10705789	---	ENSRNOT00000052623	---	---	---	---	---	---	3.52135	0.114331	3.56622	0.0832447	3.24257	0.0319862	1.03159		0.824284		0.799041		0.456462	0.343167	0.064735	0.9285	0.1181	0.0739
10705791	Zfp420	ENSRNOT00000032973	D3Z901	D3Z901_RAT	D3Z901_RAT Protein Zfp420 OS=Rattus norvegicus (Rat) GN=Zfp420 PE=4 SV=1	Zfp420	103690163	Protein Zfp420	5.62095	0.15331	5.77064	0.236559	5.14045	0.208475	1.10933	1.05126	0.716727	0.764979	0.64609	0.732451	0.97794	0.855926	0.14808	0.8675	0.2821	0.1481
10705793	---	XM_574414	---	---	---	---	---	---	6.57891	0.023533	6.8251	0.10578	7.91079	0.124733	1.18607		2.5173		2.12239		0.0351786	0.206095	0.000142978	0.2489	0.0002	0.0005
10705797	---	ENSRNOT00000042934	---	---	---	---	---	---	4.35979	0.0681447	4.44171	0.0806669	4.57321	0.0993391	1.05843		1.15943		1.09543		0.702699	0.889239	0.269064	0.7705	0.2476	0.5498
10705806	Zfp420	ENSRNOT00000032973	D3Z901	D3Z901_RAT	D3Z901_RAT Protein Zfp420 OS=Rattus norvegicus (Rat) GN=Zfp420 PE=4 SV=1	Zfp420	103690163	Protein Zfp420	6.83735	0.173759	6.82748	0.162643	6.53908	0.153354	0.993185	1.05126	0.813231	0.764979	0.818812	0.732451	0.636338	0.987623	0.395915	0.999	0.4467	0.468
10705808	---	XM_574414	---	---	---	---	---	---	7.44727	0.0679215	7.5571	0.013173	7.5921	0.0481793	1.0791		1.1056		1.02456		0.0478487	0.213569	0.17339	0.3303	0.17	0.8565
10705813	---	ENSRNOT00000056899	---	---	---	---	---	---	7.00739	0.0685374	6.91096	0.0770496	6.7379	0.0448355	0.935341		0.829609		0.886959		0.927737	0.786624	0.0588731	0.543	0.0522	0.2124
10705815	---	ENSRNOT00000039872	---	---	---	---	---	---	8.03605	0.0448403	7.77904	0.093641	7.89505	0.0243696	0.836823		0.906892		1.08373		0.797107	0.266399	0.067776	0.0582	0.2994	0.445
10705822	Znf260	NM_017364	Q62981	ZN260_RAT	ZN260_RAT Zinc finger protein 260 OS=Rattus norvegicus (Rat) GN=Znf260 PE=1 SV=1	Znf260	53982	Zinc finger protein 260	9.13936	0.0531793	9.01052	0.125201	8.7952	0.0152043	0.914564	0.914564	0.787762	0.787762	0.861352	0.861352	0.0614846	0.0859135	0.0547624	0.5153	0.0482	0.209
10705825	Zfp382	NM_144749	A0JPL0	ZN382_RAT	ZN382_RAT Zinc finger protein 382 OS=Rattus norvegicus (Rat) GN=Zfp382 PE=4 SV=1	Zfp382	246264	Zinc finger protein 382	5.93627	0.0238655	5.88174	0.0493595	6.10257	0.0638617	0.962912	0.962912	1.12218	1.12218	1.1654	1.1654	0.307431	0.47781	0.0429724	0.7307	0.1127	0.0427
10705831	---	GENSCAN00000008098	---	---	---	---	---	---	5.13671	0.0253356	5.1906	0.115358	5.1347	0	1.03806		0.998607		0.961995		0.00371063	0	0.813037	0.8508	0.9994	0.8338
10705835	Clip3	NM_001107501	D4A507	D4A507_RAT	D4A507_RAT Protein Clip3 OS=Rattus norvegicus (Rat) GN=Clip3 PE=4 SV=1	Clip3	308493	Protein Clip3	6.18206	0.0421372	6.49963	0.0380463	6.61524	0.118991	1.24623	1.24623	1.35021	1.35021	1.08343	1.08343	0.898629	0.289453	0.0164661	0.0571	0.0158	0.5533
10705849	Alkbh6	NM_001127450	G3V9E2	G3V9E2_RAT	G3V9E2_RAT Protein Alkbh6 OS=Rattus norvegicus (Rat) GN=Alkbh6 PE=4 SV=1	Alkbh6	292780	Protein Alkbh6	6.35948	0.0583778	6.21624	0.0641464	6.13177	0.0817288	0.905484	0.905484	0.853992	0.853992	0.943133	0.943133	0.410076	0.906064	0.143674	0.3722	0.1303	0.689
10705859	Syne4	BC088237	Q5M844	SYNE4_RAT	SYNE4_RAT Nesprin-4 OS=Rattus norvegicus (Rat) GN=Syne4 PE=2 SV=1	Syne4	292781	Nesprin-4	6.00763	0.113892	5.89084	0.0519303	5.7436	0.0518854	0.922236	0.922236	0.832759	0.832759	0.902979	0.902979	0.589055	0.46437	0.135524	0.5736	0.1192	0.4335
10705870	---	ENSRNOT00000056878	---	---	---	---	---	---	6.81032	0.109469	6.46444	0.176504	6.24624	0.0271392	0.786824		0.676385		0.859639		0.392555	0.139991	0.0432355	0.1896	0.0375	0.4499
10705872	Actg1	NM_001127449	P63259	ACTG_RAT	ACTG_RAT Actin, cytoplasmic 2 OS=Rattus norvegicus (Rat) GN=Actg1 PE=1 SV=1	Actg1	287876	Actin, cytoplasmic 2	11.8975	0.0418175	11.1782	0.180009	10.5363	0.106485	0.6074	0.599439	0.389264	0.384822	0.640868	0.641993	0.306457	0.270819	0.000705811	0.0147	0.0006	0.0231
10705874	Tyrobp	NM_212525	Q6X9T7	TYOBP_RAT	TYOBP_RAT TYRO protein tyrosine kinase-binding protein OS=Rattus norvegicus (Rat) GN=Tyrobp PE=3 SV=1	Tyrobp	361537	TYRO protein tyrosine kinase-binding protein	5.66851	0.126076	5.5579	0.0136112	5.42826	0.0860812	0.926195	0.926195	0.8466	0.8466	0.914062	0.914062	0.0153622	0.108995	0.23853	0.6727	0.2148	0.5828
10705880	Nfkbid	ENSRNOT00000029719	F1M2B5	F1M2B5_RAT	F1M2B5_RAT Protein Nfkbid OS=Rattus norvegicus (Rat) GN=Nfkbid PE=4 SV=2	Nfkbid	308496	Protein Nfkbid	5.78083	0.0333038	5.77841	0.00866267	5.7321	0.0545128	0.998327	0.998327	0.966789	0.966789	0.96841	0.96841	0.037014	0.169195	0.583284	1	0.6366	0.6366
10705892	Nphs1	NM_022628	A0A140TAG4	A0A140TAG4_RAT	Nephrin	Nphs1	---	---	5.45786	0.0208006	5.51467	0.0304459	5.59138	0.0731565	1.04017	1.04017	1.09696	1.09696	1.05461	1.05461	0.018919	0.225837	0.225594	0.716	0.2047	0.5205
10705928	---	XM_001075797	---	---	---	---	---	---	5.00042	0.0985546	5.74174	0.136445	7.25964	0.125291	1.67171		4.78732		2.86373		0.200613	0.90722	3.41281e-05	0.0118	0	0.0003
10705937	Wdr62	ENSRNOT00000047120	F1LRR4	F1LRR4_RAT	F1LRR4_RAT Protein Wdr62 OS=Rattus norvegicus (Rat) GN=Wdr62 PE=1 SV=3	Wdr62	308492	Protein Wdr62	5.7725	0.12373	6.4163	0.0313707	7.36328	0.192951	1.56244	1.56244	3.01212	3.01212	1.92783	1.92783	0.602914	0.166837	0.000459727	0.0332	0.0004	0.0058
10705960	Ovol3	ENSRNOT00000041301	D3ZKH1	D3ZKH1_RAT	D3ZKH1_RAT Protein LOC100912425 OS=Rattus norvegicus (Rat) GN=Ovol3 PE=4 SV=2	Ovol3	365226	Protein LOC100912425	6.53261	0.0832698	6.39939	0.0815368	6.32299	0.0290138	0.911794	0.911794	0.864761	0.864761	0.948417	0.948417	0.0908432	0.43478	0.175767	0.4024	0.1619	0.7466
10705971	LOC103690005	NM_001040180	Q1RP74	Q1RP74_RAT	Q1RP74_RAT Protein LOC100911774 OS=Rattus norvegicus (Rat) GN=LOC103690005 PE=1 SV=1	LOC103690005	292777	Protein LOC100911774	7.79275	0.0173069	7.86779	0.0586275	8.30473	0.139756	1.05339	1.05339	1.426	1.426	1.35373	1.35373	0.0528076	0.0832967	0.0131058	0.8199	0.0152	0.0305
10705978	Capns1	NM_017118	Q64537	CPNS1_RAT	CPNS1_RAT Calpain small subunit 1 OS=Rattus norvegicus (Rat) GN=Capns1 PE=1 SV=3	Capns1	29156	Calpain small subunit 1	10.8534	0.034843	10.9313	0.092177	11.2711	0.0829731	1.05549	1.05549	1.33578	1.33578	1.26555	1.26555	0.320543	0.497472	0.016312	0.7578	0.0177	0.0415
10705987	Prodh2	BC158806	B0BNG1	B0BNG1_RAT	B0BNG1_RAT Prodh2 protein OS=Rattus norvegicus (Rat) GN=Prodh2 PE=2 SV=1	Prodh2	361538	Prodh2 protein	5.65087	0.0171117	5.62857	0.0227923	5.56201	0.077819	0.984662	0.984662	0.940261	0.940261	0.954907	0.954907	0.00184827	0.159644	0.454258	0.9532	0.4536	0.6108
10706000	---	ENSRNOT00000056797	---	---	---	---	---	---	6.04653	0.0048894	6.03295	0.0921881	6.03435	0.0243678	0.990631		0.991591		1.00097		0.105538	0.0179112	0.980785	0.9841	0.9841	1
10706009	Hspb6	NM_138887	P97541	HSPB6_RAT	HSPB6_RAT Heat shock protein beta-6 OS=Rattus norvegicus (Rat) GN=Hspb6 PE=1 SV=1	Hspb6	192245	Heat shock protein beta-6	12.4311	0.0572861	11.7222	0.101477	10.6265	0.165377	0.611753	0.611753	0.28625	0.28625	0.467919	0.467919	0.329029	0.420078	9.99919e-05	0.0118	0.0001	0.0013				Response to oxidative stress
10706013	U2af1l4	NM_001008775	Q7TP17	U2AF4_RAT	U2AF4_RAT Splicing factor U2AF 26 kDa subunit OS=Rattus norvegicus (Rat) GN=U2af1l4 PE=2 SV=1	U2af1l4	361542	Splicing factor U2AF 26 kDa subunit	8.11134	0.0928644	7.97415	0.114673	7.83915	0.056569	0.909292	0.909292	0.828064	0.828064	0.910669	0.910669	0.399877	0.67762	0.190625	0.5675	0.1692	0.5819
10706026	Igflr1	ENSRNOT00000028442	D4A4X3	D4A4X3_RAT	D4A4X3_RAT Protein Igflr1 OS=Rattus norvegicus (Rat) GN=Igflr1 PE=4 SV=2	Igflr1	499126	Protein Igflr1	5.48498	0.0374816	5.47981	6.28037e-16	5.4549	0.037159	0.996427	0.996427	0.979366	0.979366	0.982878	0.982878	0.314039	0	0.725484	0.9868	0.7292	0.8139
10706033	LOC688924	NM_001109519	D3ZQ81	D3ZQ81_RAT	D3ZQ81_RAT Protein LOC688924 OS=Rattus norvegicus (Rat) GN=LOC688924 PE=4 SV=1	LOC688924	688924	Protein LOC688924	5.27198	0.0533348	5.12194	0.04471	4.98675	0.122227	0.901223	0.901223	0.820613	0.820613	0.910555	0.910555	0.592565	0.357945	0.122368	0.4365	0.1068	0.5234
10706036	Atp4a	J02649	P09626	ATP4A_RAT	ATP4A_RAT Potassium-transporting ATPase alpha chain 1 OS=Rattus norvegicus (Rat) GN=Atp4a PE=1 SV=3	Atp4a	24216	Potassium-transporting ATPase alpha chain 1	5.21195	0.048824	5.12787	0.017931	5.13833	0.00746933	0.943387	0.943387	0.950252	0.950252	1.00728	1.00728	0.0044276	0.158861	0.199573	0.2211	0.2924	0.9721
10706059	Sbsn	NM_001044231	Q32PY8	Q32PY8_RAT	Q32PY8_RAT Similar to suprabasal-specific protein suprabasin (Predicted), isoform CRA_b OS=Rattus norvegicus (Rat) GN=Sbsn PE=2 SV=1	Sbsn	292793	Similar to suprabasal-specific protein suprabasin (Predicted), isoform CRA_b	4.84425	0.0548238	4.99799	0.152902	4.89381	0	1.11245	1.11245	1.03495	1.03495	0.930334	0.930334	0.00284592	0	0.546281	0.5351	0.944	0.7169
10706065	Dmkn	BC166816	B2RYK9	B2RYK9_RAT	B2RYK9_RAT Dmkn protein OS=Rattus norvegicus (Rat) GN=Dmkn PE=2 SV=1	Dmkn	361548	Dmkn protein	4.68356	0.0600406	4.73012	0.0384738	4.7385	0.00221733	1.0328	1.0328	1.03881	1.03881	1.00582	1.00582	0.305251	0.0278005	0.621884	0.7084	0.6424	0.9926
10706083	---	ENSRNOT00000028593	---	---	---	---	---	---	4.76143	0.0425557	4.6845	0.0343727	4.69094	0.172504	0.948074		0.952313		1.00447		0.448312	0.0811588	0.847939	0.867	0.8773	0.9997
10706088	Lgi4	NM_199499	Q6P2A4	Q6P2A4_RAT	Q6P2A4_RAT Leucine-rich repeat LGI family, member 4 OS=Rattus norvegicus (Rat) GN=Lgi4 PE=2 SV=1	Lgi4	361549	Leucine-rich repeat LGI family, member 4	6.187	0.0694908	6.04442	0.106067	6.15533	0.118708	0.905898	0.905898	0.978288	0.978288	1.07991	1.07991	0.605314	0.782444	0.628377	0.6295	0.9762	0.7479
10706101	---	GENSCAN00000008895	---	---	---	---	---	---	4.30242	0.027574	4.47611	0.186355	4.25293	0.0814519	1.12793		0.966273		0.856676		0.0816146	0.101124	0.418773	0.5816	0.9457	0.4173
10706105	Scgb2b2	ENSRNOT00000030687	F1LSA5	F1LSA5_RAT	F1LSA5_RAT Protein Scgb2b2 OS=Rattus norvegicus (Rat) GN=Scgb2b2 PE=4 SV=3	Scgb2b2	494527	Protein Scgb2b2	3.48565	0.10399	3.49933	0	3.5603	0.0609627	1.00953	1.00953	1.0531	1.0531	1.04316	1.04316	0.0167813	0	0.739874	0.9899	0.7462	0.8194
10706108	---	ENSRNOT00000046226	---	---	---	---	---	---	4.28837	0.0114073	4.17118	0.0893213	3.85045	0.0193959	0.921982		0.738197		0.800664		0.0978246	0.0297395	0.00290211	0.3405	0.0028	0.0126
10706112	Scgb1b30	ENSRNOT00000052376	G3V9B4	G3V9B4_RAT	G3V9B4_RAT Androgen binding protein, alpha OS=Rattus norvegicus (Rat) GN=Scgb1b30 PE=4 SV=1	Scgb1b30	361551	Androgen binding protein, alpha	3.28491	0.0369225	3.24092	0.00305033	3.21294	0.100679	0.969972	0.969972	0.951339	0.951339	0.98079	0.98079	0.0157066	0.00787271	0.740014	0.8642	0.7271	0.9635
10706115	RGD1560088	ENSRNOT00000047207	D3ZQH7	D3ZQH7_RAT	D3ZQH7_RAT Protein RGD1560088 OS=Rattus norvegicus (Rat) GN=RGD1560088 PE=4 SV=3	RGD1560088	499131	Protein RGD1560088	3.9021	0.0663367	3.93951	0.183005	3.7981	0.0247006	1.02627	1.02627	0.930452	0.930452	0.906632	0.906632	0.0103121	0.0698678	0.663172	0.9711	0.7875	0.6582
10706117	Pepd	NM_001009641	Q5I0D7	PEPD_RAT	PEPD_RAT Xaa-Pro dipeptidase OS=Rattus norvegicus (Rat) GN=Pepd PE=2 SV=1	Pepd	292808	Xaa-Pro dipeptidase	9.66489	0.0775366	9.71558	0.0872438	9.49988	0.060787	1.03576	1.03576	0.891922	0.891922	0.861128	0.861128	0.597516	0.901867	0.190762	0.8755	0.3467	0.1886
10706131	Cebpa	NM_012524	P05554	CEBPA_RAT	CEBPA_RAT CCAAT/enhancer-binding protein alpha OS=Rattus norvegicus (Rat) GN=Cebpa PE=1 SV=3	Cebpa	24252	CCAAT/enhancer-binding protein alpha	6.03646	0.102314	6.18524	0.0812539	6.32943	0.0848909	1.10863	1.10863	1.22516	1.22516	1.1051	1.1051	0.717056	0.954093	0.148124	0.498	0.13	0.54
10706134	Slc7a10	NM_053726	Q75T81	Q75T81_RAT	Q75T81_RAT Asc-type amino acid transporter 1 OS=Rattus norvegicus (Rat) GN=Slc7a10 PE=2 SV=1	Slc7a10	114518	Asc-type amino acid transporter 1	5.58934	0.0323311	5.79425	0.00225786	5.53593	0.0322052	1.15261	1.15261	0.963655	0.963655	0.836062	0.836062	0.132462	0.0607519	0.00124831	0.0046	0.3717	0.0013
10706146	Rhpn2	NM_001107505	D4A8N7	D4A8N7_RAT	D4A8N7_RAT Protein Rhpn2 OS=Rattus norvegicus (Rat) GN=Rhpn2 PE=4 SV=1	Rhpn2	308516	Protein Rhpn2	5.11746	0.0355074	5.1955	0.0796753	5.08288	0.0687389	1.05558	1.05558	0.976317	0.976317	0.924911	0.924911	0.487946	0.607104	0.503178	0.6916	0.9293	0.4895
10706162	Cep89	NM_001127599	B1WBZ3	B1WBZ3_RAT	B1WBZ3_RAT Ccdc123 protein OS=Rattus norvegicus (Rat) GN=Cep89 PE=2 SV=1	Cep89	292811	Ccdc123 protein	6.01273	0.0306457	6.20763	0.0103495	6.30136	0.0255478	1.14464	1.14464	1.22148	1.22148	1.06713	1.06713	0.503093	0.396901	0.000429835	0.0031	0.0004	0.0789
10706181	Slc7a9	NM_053929	P82252	BAT1_RAT	BAT1_RAT b(0,+)-type amino acid transporter 1 OS=Rattus norvegicus (Rat) GN=Slc7a9 PE=1 SV=1	Slc7a9	116726	b(0,+)-type amino acid transporter 1	5.09085	0.023168	5.07008	0.0115057	5.07835	0.0631067	0.985706	0.985706	0.991375	0.991375	1.00575	1.00575	0.33726	0.117155	0.919196	0.912	0.9701	0.983
10706197	Rps2	NM_031838	P27952	RS2_RAT	RS2_RAT 40S ribosomal protein S2 OS=Rattus norvegicus (Rat) GN=Rps2 PE=1 SV=1	Rps2	83789	40S ribosomal protein S2	11.766	0.00375226	11.6985	0.11185	11.7392	0.0448304	0.954328	0.950318	0.981616	0.979398	1.02859	1.03053	0.879518	0.00707376	0.790232	0.7759	0.9625	0.905
10706201	---	ENSRNOT00000017669	---	---	---	---	---	---	6.51954	0.105113	6.3885	0.0919123	6.33412	0.138056	0.913171		0.879393		0.96301		0.813643	0.862363	0.516755	0.6926	0.5059	0.9399
10706216	Tshz3	NM_001107506	D3ZKB9	TSH3_RAT	TSH3_RAT Teashirt homolog 3 OS=Rattus norvegicus (Rat) GN=Tshz3 PE=1 SV=2	Tshz3	308523	Teashirt homolog 3	7.21184	0.0624253	7.06457	0.0652437	6.79213	0.125581	0.902958	0.902958	0.747577	0.747577	0.82792	0.82792	0.582072	0.61348	0.0416501	0.5032	0.0369	0.163
10706219	Rpl27a	ENSRNOT00000019247	P18445	RL27A_RAT	RL27A_RAT 60S ribosomal protein L27a OS=Rattus norvegicus (Rat) GN=Rpl27a PE=1 SV=3	Rpl27a	293418	60S ribosomal protein L27a	9.86991	0.0638745	9.99392	0.162942	9.97327	0.0412761	1.08976	1.0954	1.07428	1.10693	0.98579	1.00729	0.0831189	0.228498	0.693325	0.7084	0.7715	0.993
10706221	LOC690000	ENSRNOT00000020079	D3ZWS2	D3ZWS2_RAT	D3ZWS2_RAT Protein LOC690000 OS=Rattus norvegicus (Rat) GN=LOC690000 PE=1 SV=1	LOC690000	690000	Protein LOC690000	7.68491	0.0707157	7.46498	0.0521304	6.70691	0.158014	0.858606	0.858606	0.507683	0.507683	0.591288	0.591288	0.121613	0.344028	0.00136614	0.3704	0.0014	0.0051
10706224	---	XR_006777	---	---	---	---	---	---	3.79865	0.0380097	3.80122	0.138797	3.68414	0.0942479	1.00179		0.923694		0.922048		0.424262	0.321512	0.667378	0.9997	0.7203	0.7068
10706226	---	ENSRNOT00000056552	---	---	---	---	---	---	4.06746	0.162113	4.20168	0.053252	4.26245	0.0678559	1.09749		1.14472		1.04303		0.360893	0.310414	0.449553	0.6499	0.4354	0.9156
10706228	---	XR_006793	---	---	---	---	---	---	5.34318	0.0349747	5.04094	0.178807	5.36268	0.0352589	0.810987		1.01361		1.24984		0.00107872	0.0549095	0.136016	0.1947	0.9905	0.1649
10706236	Uqcrb	NM_001127553	B2RYS2	B2RYS2_RAT	B2RYS2_RAT Cytochrome b-c1 complex subunit 7 OS=Rattus norvegicus (Rat) GN=Uqcrb PE=1 SV=1	Uqcrb	362897	Cytochrome b-c1 complex subunit 7	11.9418	0.0471175	11.5505	0.0644328	11.1864	0.0975491	0.762428	0.780698	0.592367	0.601954	0.776948	0.77075	0.877843	0.651685	0.00110108	0.0226	0.0009	0.0304			Oxidative phosphorylation
10706238	---	ENSRNOT00000054239	---	---	---	---	---	---	5.40642	0.182491	5.45915	0.165637	5.15531	0.152946	1.03723		0.840249		0.810092		0.315984	0.974914	0.442199	0.976	0.5665	0.4565
10706240	Zfp939	ENSRNOT00000039649	F1LVJ0	F1LVJ0_RAT	F1LVJ0_RAT Protein Zfp939 OS=Rattus norvegicus (Rat) GN=Zfp939 PE=4 SV=3	Zfp939	690136	Protein Zfp939	6.40271	0.0489478	6.15766	0.295892	6.02998	0.036734	0.843791	0.843791	0.772322	0.772322	0.9153	0.9153	0.986214	0.0245535	0.372016	0.6067	0.3534	0.8691
10706242	---	ENSRNOT00000015266	---	---	---	---	---	---	5.83368	0.0704694	5.78761	0.186209	6.14998	0.0373584	0.96857		1.24514		1.28554		0.35492	0.139128	0.127772	0.9559	0.2061	0.1432
10706246	LOC100362023	NM_001126089	V9GZ87	V9GZ87_RAT	V9GZ87_RAT CDC42 small effector protein 2 OS=Rattus norvegicus (Rat) GN=LOC100362023 PE=1 SV=1	LOC100362023	691031	CDC42 small effector protein 2	9.0522	0.139788	8.90155	0.0510156	8.38869	0.057059	0.900848	0.915427	0.63134	0.665529	0.700829	0.726604	0.605859	0.355142	0.00550445	0.5233	0.0056	0.0187
10706249	Vstm2b	NM_001108479	D4A3Q0	D4A3Q0_RAT	D4A3Q0_RAT Protein Vstm2b OS=Rattus norvegicus (Rat) GN=Vstm2b PE=4 SV=1	Vstm2b	361560	Protein Vstm2b	5.10567	0.0336073	5.15579	0.0196239	5.14045	0.0376824	1.03534	1.03534	1.0244	1.0244	0.989425	0.989425	0.323001	0.662894	0.570381	0.5728	0.7002	0.9723
10706258	MGC114499	BC097443	Q4V8D0	Q4V8D0_RAT	Q4V8D0_RAT Protein MGC114499 OS=Rattus norvegicus (Rat) GN=MGC114499 PE=2 SV=1	MGC114499	499135	Protein MGC114499	4.54135	0.0254828	4.5042	0.0672626	4.4577	0.0951449	0.974578	0.974578	0.943668	0.943668	0.968284	0.968284	0.361967	0.336952	0.726622	0.926	0.7054	0.8987
10706263	LOC690284	ENSRNOT00000030895	F1LTK0	F1LTK0_RAT	F1LTK0_RAT Protein LOC690284 OS=Rattus norvegicus (Rat) GN=LOC690284 PE=4 SV=2	LOC690284	690284	Protein LOC690284	4.75616	0.0186501	4.74951	0.0979636	4.76396	0	0.995399	0.995399	1.00542	1.00542	1.01007	1.01007	0.0210138	0	0.98677	0.9963	0.9963	0.9854
10706270	---	XR_006856	---	---	---	---	---	---	5.80089	0.0541678	5.70679	0.0263706	5.59285	0.0856561	0.936855		0.865713		0.924062		0.184521	0.395822	0.121174	0.5496	0.1061	0.4113
10706272	---	XM_001080227	---	---	---	---	---	---	6.93481	0.0959202	7.63977	0.0830926	7.15176	0.0305312	1.6301		1.16228		0.713009		0.672216	0.41888	0.00165613	0.0015	0.1878	0.0097
10706276	Vom2r38	NM_001099476	D3ZSW6	D3ZSW6_RAT	D3ZSW6_RAT Protein Vom2r37 OS=Rattus norvegicus (Rat) GN=Vom2r38 PE=4 SV=3	Vom2r38	308551	Protein Vom2r37	3.69347	0.0443752	3.69409	0.0388301	3.88267	0.0771674	1.00043	1.00043	1.14013	1.14013	1.13964	1.13964	0.210724	0.586346	0.0836792	0.999	0.1121	0.1183
10706289	---	XR_009361	---	---	---	---	---	---	6.72235	0.0392687	6.68732	0.00423667	6.60352	0.0926696	0.97601		0.920933		0.943569		0.00211306	0.0327639	0.40454	0.9155	0.3937	0.5991
10706291	---	ENSRNOT00000052897	---	---	---	---	---	---	2.89651	0.0509331	2.97739	0.0749657	2.90402	0.0781801	1.05766		1.00522		0.950416		0.328571	0.848692	0.665016	0.6934	0.9975	0.7314
10706293	---	ENSRNOT00000053854	---	---	---	---	---	---	4.32596	0.256892	3.89414	0.165628	3.81517	0.0334948	0.741328		0.701838		0.946731		0.282856	0.0994212	0.167688	0.272	0.1792	0.9409
10706295	---	ENSRNOT00000050158	---	---	---	---	---	---	3.16632	0.0633814	3.07071	0.200805	2.96257	0.0431151	0.935872		0.86829		0.927787		0.960091	0.132268	0.526211	0.8406	0.4974	0.8116
10706297	Siglec5	NM_001106249	D3Z9T4	D3Z9T4_RAT	D3Z9T4_RAT Protein Siglec5 OS=Rattus norvegicus (Rat) GN=Siglec5 PE=1 SV=2	Siglec5	292843	Protein Siglec5	6.4685	0.0651896	6.44261	0.111082	6.19488	0.115806	0.982216	0.982216	0.827241	0.827241	0.84222	0.84222	0.566076	0.758588	0.189021	0.981	0.215	0.2709
10706308	Siglec10	NM_001106250	D3ZF71	D3ZF71_RAT	D3ZF71_RAT Protein Siglec10 OS=Rattus norvegicus (Rat) GN=Siglec10 PE=4 SV=1	Siglec10	292844	Protein Siglec10	4.50141	0.01267	4.53301	0.0384421	4.37436	0.0707181	1.02215	1.02215	0.915706	0.915706	0.895866	0.895866	0.0512671	0.182588	0.113759	0.8938	0.2123	0.119
10706320	Lim2	NM_053771	P54825	LMIP_RAT	LMIP_RAT Lens fiber membrane intrinsic protein OS=Rattus norvegicus (Rat) GN=Lim2 PE=1 SV=1	Lim2	114903	Lens fiber membrane intrinsic protein	4.78657	0.0618388	4.67582	0.0737697	4.64555	0.062272	0.926106	0.926106	0.906878	0.906878	0.979238	0.979238	0.146373	0.967446	0.336713	0.4776	0.345	0.9549
10706326	Nkg7	NM_133540	Q9WVL9	Q9WVL9_RAT	Q9WVL9_RAT Natural killer cell group 7 sequence, isoform CRA_a OS=Rattus norvegicus (Rat) GN=Nkg7 PE=2 SV=1	Nkg7	171062	Natural killer cell group 7 sequence, isoform CRA_a	4.47152	0.0513671	4.40062	0.0139123	4.26067	0.0803105	0.952041	0.952041	0.864027	0.864027	0.907552	0.907552	0.159558	0.149586	0.0883094	0.6888	0.0817	0.24
10706333	Cldnd2	NM_001109143	D3ZQB5	D3ZQB5_RAT	D3ZQB5_RAT Protein Cldnd2 OS=Rattus norvegicus (Rat) GN=Cldnd2 PE=4 SV=1	Cldnd2	499140	Protein Cldnd2	4.40261	0.00170433	4.40249	0.0596848	4.46459	0.0423129	0.999923	0.999923	1.0439	1.0439	1.04398	1.04398	0.35336	0	0.498013	1	0.5565	0.5565
10706339	Etfb	NM_001004220	Q68FU3	ETFB_RAT	ETFB_RAT Electron transfer flavoprotein subunit beta OS=Rattus norvegicus (Rat) GN=Etfb PE=2 SV=3	Etfb	292845	Electron transfer flavoprotein subunit beta	9.76506	0.0372429	9.46997	0.0827114	8.53982	0.0786432	0.81502	0.81502	0.427724	0.427724	0.524802	0.524802	0.0596415	0.59548	3.8939e-05	0.0542	0	0.0002
10706346	Vsig10l	ENSRNOT00000039446	F1M5N2	F1M5N2_RAT	F1M5N2_RAT Protein Vsig10l OS=Rattus norvegicus (Rat) GN=Vsig10l PE=4 SV=3	Vsig10l	308556	Protein Vsig10l	6.21957	0.0705274	6.18219	0.0739127	5.8883	0.137441	0.974423	0.974423	0.794832	0.794832	0.815695	0.815695	0.195017	0.627828	0.100448	0.9627	0.1165	0.1631
10706358	---	ENSRNOT00000032403	---	---	---	---	---	---	5.47248	0.0215433	5.37174	0.0898963	4.86441	0.107619	0.932556		0.656073		0.703521		0.126931	0.184536	0.00388703	0.6936	0.0045	0.0104
10706363	Zfp719	ENSRNOT00000024645	F1MAM5	F1MAM5_RAT	F1MAM5_RAT Protein Zfp719 OS=Rattus norvegicus (Rat) GN=Zfp719 PE=4 SV=1	Zfp719	100361791	Protein Zfp719	6.21136	0.100667	6.34933	0.0602809	6.52987	0.0651911	1.10036	1.10036	1.24704	1.24704	1.13331	1.13331	0.834107	0.773033	0.0706365	0.4584	0.0608	0.3022
10706367	Zfp819	NM_001014017	Q5PQR1	Q5PQR1_RAT	Q5PQR1_RAT Protein Zfp819 OS=Rattus norvegicus (Rat) GN=Zfp819 PE=2 SV=1	Zfp819	308561	Protein Zfp819	4.53931	0.0287649	4.50716	0.0334618	4.63699	0.0227819	0.977964	0.977964	1.07005	1.07005	1.09417	1.09417	0.425952	0.925292	0.0386471	0.7418	0.0998	0.039
10706374	Ceacam18	ENSRNOT00000038229	D3ZXU3	D3ZXU3_RAT	D3ZXU3_RAT Protein Ceacam18 OS=Rattus norvegicus (Rat) GN=Ceacam18 PE=4 SV=3	Ceacam18	502334	Protein Ceacam18	3.90721	0.0783965	3.86753	0.0253357	3.85615	0.000738	0.972868	0.972868	0.965228	0.965228	0.992147	0.992147	0.00517343	0.0108448	0.75685	0.8546	0.7515	0.979
10706381	Ctu1	NM_001106251	B1WBV0	CTU1_RAT	CTU1_RAT Cytoplasmic tRNA 2-thiolation protein 1 OS=Rattus norvegicus (Rat) GN=Ctu1 PE=2 SV=1	Ctu1	292847	Cytoplasmic tRNA 2-thiolation protein 1	6.62667	0.211484	6.63062	0.074461	6.63446	0.132349	1.00274	1.00274	1.00542	1.00542	1.00266	1.00266	0.988302	0.452497	0.999515	0.9999	0.9995	0.9999
10706385	Klk14	ENSRNOT00000029197	F1M091	F1M091_RAT	F1M091_RAT Protein Klk14 OS=Rattus norvegicus (Rat) GN=Klk14 PE=3 SV=2	Klk14	308562	Protein Klk14	4.87735	0.088462	5.00046	0.0346547	5.09654	0.0922979	1.08909	1.08909	1.16408	1.16408	1.06886	1.06886	0.0651432	0.453546	0.209219	0.5216	0.1881	0.6769
10706391	Klk13	ENSRNOT00000039531	D3ZJ70	D3ZJ70_RAT	D3ZJ70_RAT Protein Klk13 OS=Rattus norvegicus (Rat) GN=Klk13 PE=3 SV=1	Klk13	292848	Protein Klk13	4.83157	0.0409181	4.817	0.00578773	4.73088	0.0359332	0.989954	0.989954	0.93259	0.93259	0.942053	0.942053	0.914783	0.119256	0.121231	0.9508	0.1354	0.1992
10706399	Klk12	NM_001107508	D3ZD22	D3ZD22_RAT	D3ZD22_RAT Glandular kallikrein-12, submandibular/renal OS=Rattus norvegicus (Rat) GN=Klk12 PE=3 SV=2	Klk12	308564	Glandular kallikrein-12, submandibular/renal	5.92016	0.0807078	5.79558	0.117538	5.92681	0.129183	0.91727	0.91727	1.00462	1.00462	1.09523	1.09523	0.845219	0.830927	0.653779	0.7136	0.999	0.6896
10706404	Klk11	NM_001106252	D3ZZK6	D3ZZK6_RAT	D3ZZK6_RAT Kallikrein 11 (Predicted), isoform CRA_b OS=Rattus norvegicus (Rat) GN=Klk11 PE=3 SV=1	Klk11	292849	Kallikrein 11 (Predicted), isoform CRA_b	5.15269	0.100823	5.20191	0.0180463	5.30052	0.0210868	1.03471	1.03471	1.10791	1.10791	1.07074	1.07074	0.03923	0.0533122	0.286316	0.8161	0.2675	0.5376
10706412	Klk10	NM_001004100	Q6IE55	Q6IE55_RAT	Q6IE55_RAT Glandular kallikrein-10 OS=Rattus norvegicus (Rat) GN=Klk10 PE=2 SV=1	Klk10	292850	Glandular kallikrein-10	4.838	0.0727125	4.75877	0.0641464	4.69747	0.0670467	0.946565	0.946565	0.907187	0.907187	0.958399	0.958399	0.879846	0.97756	0.39061	0.7096	0.3622	0.7879
10706418	Klk9	NM_001106253	G3V934	G3V934_RAT	G3V934_RAT Kallikrein 9 (Predicted) OS=Rattus norvegicus (Rat) GN=Klk9 PE=3 SV=1	Klk9	292851	Kallikrein 9 (Predicted)	5.06906	0.071023	5.12619	0.0162841	5.21349	0.0940094	1.0404	1.0404	1.10529	1.10529	1.06238	1.06238	0.441593	0.19358	0.38526	0.8313	0.3605	0.6602
10706424	Klk8	NM_001107509	G3V8E9	G3V8E9_RAT	G3V8E9_RAT Kallikrein 8 (Neuropsin/ovasin) OS=Rattus norvegicus (Rat) GN=Klk8 PE=3 SV=1	Klk8	308565	Kallikrein 8 (Neuropsin/ovasin)	5.37018	0.127	5.40611	0.0700816	5.50704	0.0482527	1.02522	1.02522	1.09951	1.09951	1.07247	1.07247	0.259839	0.44308	0.55346	0.9531	0.5458	0.712
10706431	Klk7	NM_001106254	D3ZZY0	D3ZZY0_RAT	D3ZZY0_RAT Glandular kallikrein-7, submandibular/renal OS=Rattus norvegicus (Rat) GN=Klk7 PE=3 SV=3	Klk7	292852	Glandular kallikrein-7, submandibular/renal	5.47437	0.0712067	5.44754	0.0846773	5.42323	0.0212501	0.981571	0.981571	0.965168	0.965168	0.983289	0.983289	0.275011	0.288067	0.871423	0.9572	0.8598	0.967
10706437	Klk6	NM_019175	O54854	O54854_RAT	O54854_RAT Kallikrein 6, isoform CRA_a OS=Rattus norvegicus (Rat) GN=Klk6 PE=2 SV=1	Klk6	29245	Kallikrein 6, isoform CRA_a	4.89139	0.0146334	4.87879	0	4.88912	0.010336	0.991303	0.991303	0.998431	0.998431	1.00719	1.00719	0.00131328	0	0.751315	0.7881	1	0.7881
10706447	Klk5	ENSRNOT00000025489	D3ZRA7	D3ZRA7_RAT	D3ZRA7_RAT Protein Klk5 OS=Rattus norvegicus (Rat) GN=Klk5 PE=3 SV=3	Klk5	102546758	Protein Klk5	4.54345	0.0513538	4.7187	0.0680872	4.87145	0.0771175	1.12916	1.12916	1.25526	1.25526	1.11168	1.11168	0.53205	0.886332	0.0345785	0.2328	0.0289	0.2897
10706454	Klk4	NM_001004101	Q6IE12	Q6IE12_RAT	Q6IE12_RAT Kallikrein 4 OS=Rattus norvegicus (Rat) GN=Klk4 PE=2 SV=1	Klk4	408210	Kallikrein 4	5.82377	0.0370887	5.66353	0.068137	5.50488	0.0898274	0.894881	0.894881	0.801691	0.801691	0.895864	0.895864	0.69343	0.534777	0.0425643	0.2897	0.0357	0.2897
10706461	---	ENSRNOT00000046254	---	---	---	---	---	---	5.80742	0.0695463	5.95495	0.0513771	5.76335	0.092555	1.10767		0.969913		0.875633		0.582058	0.741707	0.236288	0.3907	0.9092	0.2368
10706465	---	ENSRNOT00000056467	D3ZXE4	D3ZXE4_RAT	D3ZXE4_RAT Uncharacterized protein OS=Rattus norvegicus (Rat) PE=4 SV=1	---	---	Uncharacterized protein	4.72387	0.157108	4.87352	0.146704	4.54471	0.0788143	1.1093	1.1093	0.883218	0.883218	0.796196	0.796196	0.606348	0.667362	0.290287	0.7199	0.6299	0.2643
10706468	Klk1c8	NM_001013067	G3V8G8	G3V8G8_RAT	G3V8G8_RAT Kallikrein 6 (Predicted) OS=Rattus norvegicus (Rat) GN=Klk1c8 PE=3 SV=1	Klk1c8	292866	Kallikrein 6 (Predicted)	3.31976	0.0366996	3.48041	0.115111	3.36366	0.104428	1.11779	1.11779	1.03089	1.03089	0.922262	0.922262	0.932015	0.366182	0.488774	0.4804	0.9413	0.6621
10706474	---	ENSRNOT00000056456	---	---	---	---	---	---	5.14196	0.0307449	5.39149	0.187186	5.17259	0.0538719	1.18882		1.02146		0.859224		0.000429915	0.0684253	0.307874	0.3365	0.9851	0.4069
10706479	---	GENSCAN00000008053	---	---	---	---	---	---	5.63283	0.00337436	5.92176	0.0815016	5.75727	0.0307464	1.22174		1.09009		0.892242		0.0972256	0.0112593	0.0189776	0.0158	0.2574	0.1349
10706483	Klk1c9Klna2rCG_54431	NM_175759	A0A1R3UCK3	A0A1R3UCK3_RAT	Kallikrein a2 (RCG54431)	Klk1c9Klna2rCG_54431	---	---	4.26493	0.0996376	4.25396	0.0547877	4.07515	0.120879	0.992427	0.992427	0.876744	0.876744	0.883434	0.883434	0.726683	0.604331	0.361799	0.997	0.4064	0.4411
10706488	Klk7	NM_012593	P36373	KLK7_RAT	KLK7_RAT Glandular kallikrein-7, submandibular/renal OS=Rattus norvegicus (Rat) GN=Klk7 PE=1 SV=1	Klk7	24523	Glandular kallikrein-7, submandibular/renal	5.95391	0.157331	5.45309	0.0843537	5.57884	0.0827424	0.706705	0.706705	0.77107	0.77107	1.09108	1.09108	0.237719	0.609599	0.0493428	0.0487	0.1273	0.7381
10706492	---	ENSRNOT00000056448	---	---	---	---	---	---	3.79144	0.0593445	3.85422	0.0583389	3.79213	0.00845709	1.04448		1.00048		0.957873		0.422734	0.0760425	0.587806	0.6408	1	0.6408
10706498	Klk15	ENSRNOT00000038353	D3ZIL3	D3ZIL3_RAT	D3ZIL3_RAT Protein Klk15 OS=Rattus norvegicus (Rat) GN=Klk15 PE=3 SV=1	Klk15	292873	Protein Klk15	4.95084	0.0637856	4.90512	0.062059	4.74402	0.0207749	0.968805	0.968805	0.866444	0.866444	0.894343	0.894343	0.644025	0.413392	0.0686854	0.8138	0.0698	0.1539
10706503	Klk1b3	NM_031523	A0A0G2JSQ7	A0A0G2JSQ7_RAT	A0A0G2JSQ7_RAT Protein Klk1c9 OS=Rattus norvegicus (Rat) GN=Klk1b3 PE=3 SV=1	Klk1b3	24594	Protein Klk1c9	5.38173	0.0555296	5.15347	0.185233	5.2102	0.105285	0.853661	0.853661	0.887899	0.887899	1.04011	1.04011	0.0902387	0.359873	0.45423	0.4505	0.6193	0.9464
10706509	Fv1	BC060592	Q6P9U2	Q6P9U2_RAT	Q6P9U2_RAT Uncharacterized protein OS=Rattus norvegicus (Rat) GN=Fv1 PE=2 SV=1	Fv1	308568	Uncharacterized protein	6.04712	0.0363339	6.20884	0.162011	6.64877	0.0467553	1.11862	1.11862	1.51745	1.51745	1.35654	1.35654	0.500497	0.112162	0.012809	0.5163	0.0123	0.0467
10706515	Shank1	NM_031751	Q9WV48	SHAN1_RAT	SHAN1_RAT SH3 and multiple ankyrin repeat domains protein 1 OS=Rattus norvegicus (Rat) GN=Shank1 PE=1 SV=1	Shank1	78957	SH3 and multiple ankyrin repeat domains protein 1	5.73623	0.10054	5.50726	0.0883393	5.52334	0.0640556	0.853244	0.853244	0.862808	0.862808	1.01121	1.01121	0.135721	0.844676	0.189285	0.2211	0.2621	0.9897
10706545	Syt3	NM_019122	P40748	SYT3_RAT	SYT3_RAT Synaptotagmin-3 OS=Rattus norvegicus (Rat) GN=Syt3 PE=1 SV=1	Syt3	25731	Synaptotagmin-3	5.29185	0.0307192	5.20149	0.0288982	5.13222	0.0489203	0.939293	0.939293	0.895258	0.895258	0.953119	0.953119	0.626411	0.725808	0.0634037	0.2844	0.0544	0.4393
10706559	Lrrc4b	ENSRNOT00000026259	P0CC10	LRC4B_RAT	LRC4B_RAT Leucine-rich repeat-containing protein 4B OS=Rattus norvegicus (Rat) GN=Lrrc4b PE=1 SV=1	Lrrc4b	308571	Leucine-rich repeat-containing protein 4B	6.45749	0.0451374	6.23759	0.139416	6.22796	0.0541167	0.858622	0.858622	0.852912	0.852912	0.99335	0.99335	0.656861	0.276841	0.201784	0.2665	0.2421	0.9967
10706563	Aspdh	BC088252	Q5I0J9	ASPD_RAT	ASPD_RAT Putative L-aspartate dehydrogenase OS=Rattus norvegicus (Rat) GN=Aspdh PE=2 SV=1	Aspdh	292875	Putative L-aspartate dehydrogenase	5.50269	0.110156	5.37514	0.00447597	5.31125	0.059409	0.915381	0.915381	0.875731	0.875731	0.956684	0.956684	0.00236755	0.00961894	0.23325	0.4568	0.2192	0.814
10706571	Josd2	NM_001106256	D4AD44	D4AD44_RAT	D4AD44_RAT Protein Josd2 OS=Rattus norvegicus (Rat) GN=Josd2 PE=4 SV=1	Josd2	292876	Protein Josd2	7.46048	0.00428167	7.37147	0.0688623	7.50976	0.0353098	0.940165	0.940165	1.03475	1.03475	1.1006	1.1006	0.187996	0.0190349	0.165699	0.3953	0.7269	0.1517
10706577	Fam71e1	ENSRNOT00000043724	D4A176	D4A176_RAT	D4A176_RAT Protein Fam71e1 OS=Rattus norvegicus (Rat) GN=Fam71e1 PE=1 SV=1	Fam71e1	361564	Protein Fam71e1	6.34602	0.0219475	6.36374	0.136893	6.47885	0.0617976	1.01236	1.01236	1.09644	1.09644	1.08305	1.08305	0.459044	0.13684	0.527443	0.9857	0.5453	0.6352
10706586	Napsa	NM_031670	Q9QX71	Q9QX71_RAT	Q9QX71_RAT Napsin OS=Rattus norvegicus (Rat) GN=Napsa PE=1 SV=1	Napsa	60575	Napsin	5.43449	0.0663425	5.17086	0.124956	5.22027	0.037402	0.832992	0.832992	0.862012	0.862012	1.03484	1.03484	0.763309	0.320524	0.142091	0.1483	0.2513	0.9091
10706597	Kcnc3	NM_053997	Q811T3	Q811T3_RAT	Q811T3_RAT Kv3.3c voltage gated potassium channel subunit splice variant C OS=Rattus norvegicus (Rat) GN=Kcnc3 PE=2 SV=1	Kcnc3	117101	Kv3.3c voltage gated potassium channel subunit splice variant C	6.01871	0.0359159	5.97131	0.053725	5.8455	0.0518124	0.967677	0.967677	0.886867	0.886867	0.916491	0.916491	0.623411	0.880214	0.108191	0.7821	0.1041	0.247
10706612	---	ENSRNOT00000027163	---	---	---	---	---	---	4.05684	0.0502313	3.94892	0.0569188	3.89292	0.0764565	0.927921		0.892595		0.961929		0.586147	0.843583	0.244761	0.4858	0.2282	0.8006
10706619	Vrk3	NM_001005561	Q66HC2	Q66HC2_RAT	Q66HC2_RAT Protein Vrk3 OS=Rattus norvegicus (Rat) GN=Vrk3 PE=1 SV=1	Vrk3	361565	Protein Vrk3	8.109	0.0580162	8.01778	0.0297965	8.64879	0.064609	0.93873	0.93873	1.45375	1.45375	1.54864	1.54864	0.0439548	0.676036	0.000320122	0.4747	0.0009	0.0004
10706635	Nup62	NM_023098	P17955	NUP62_RAT	NUP62_RAT Nuclear pore glycoprotein p62 OS=Rattus norvegicus (Rat) GN=Nup62 PE=1 SV=1	Nup62	65274	Nuclear pore glycoprotein p62	7.60216	0.0387708	7.87621	0.0324662	7.52035	0.0776647	1.2092	1.2092	0.944872	0.944872	0.781403	0.781403	0.804282	0.476882	0.00789616	0.0265	0.5499	0.008
10706637	Il4i1	ENSRNOT00000027320	D3ZN20	D3ZN20_RAT	D3ZN20_RAT Protein Il4i1 OS=Rattus norvegicus (Rat) GN=Il4i1 PE=4 SV=2	Il4i1	100360621	Protein Il4i1	4.94922	0.0295298	5.07815	0.0604454	4.8718	0.0601431	1.09348	1.09348	0.947752	0.947752	0.866727	0.866727	0.687153	0.664767	0.0774825	0.2578	0.5798	0.0689
10706644	Akt1s1	NM_001106259	D3ZH75	D3ZH75_RAT	D3ZH75_RAT AKT1 substrate 1 (Proline-rich) (Predicted), isoform CRA_d OS=Rattus norvegicus (Rat) GN=Akt1s1 PE=1 SV=1	Akt1s1	292887	AKT1 substrate 1 (Proline-rich) (Predicted), isoform CRA_d	8.82526	0.00565275	9.04545	0.195898	9.37067	0.0560293	1.16488	1.16488	1.45943	1.45943	1.25286	1.25286	0.0630063	0.00606135	0.0456651	0.4289	0.0393	0.2103
10706650	Pnkp	NM_001004259	Q6AXV0	Q6AXV0_RAT	Q6AXV0_RAT Polynucleotide kinase 3'-phosphatase OS=Rattus norvegicus (Rat) GN=Pnkp PE=1 SV=1	Pnkp	308576	Polynucleotide kinase 3'-phosphatase	5.92274	0.0796117	6.08624	0.0795267	6.35603	0.109215	1.12	1.12	1.35031	1.35031	1.20563	1.20563	0.624441	0.911488	0.0374057	0.4289	0.0324	0.1715
10706668	Fuz	NM_001037646	Q3B756	FUZZY_RAT	FUZZY_RAT Protein fuzzy homolog OS=Rattus norvegicus (Rat) GN=Fuz PE=2 SV=2	Fuz	308577	Protein fuzzy homolog	6.54125	0.0934311	6.95707	0.16415	6.31547	0.0594692	1.33406	1.33406	0.855131	0.855131	0.641001	0.641001	0.376588	0.442341	0.0189714	0.0914	0.3903	0.0166
10706684	Tsks	NM_199088	P60531	TSKS_RAT	TSKS_RAT Testis-specific serine kinase substrate OS=Rattus norvegicus (Rat) GN=Tsks PE=1 SV=1	Tsks	292890	Testis-specific serine kinase substrate	5.02366	0.0613973	5.02314	0.0817409	5.04411	0.116933	0.999635	0.999635	1.01427	1.01427	1.01464	1.01464	0.695967	0.712835	0.985726	0.9996	0.9863	0.9904
10706696	Irf3	NM_001006969	Q5XIB0	Q5XIB0_RAT	Q5XIB0_RAT Interferon regulatory factor 3 OS=Rattus norvegicus (Rat) GN=Irf3 PE=1 SV=1	Irf3	292892	Interferon regulatory factor 3	7.63709	0.0834686	7.83043	0.107743	7.87968	0.0626257	1.14341	1.14341	1.18311	1.18311	1.03473	1.03473	0.420279	0.801767	0.191807	0.3167	0.1986	0.9248
10706705	Rras	NM_001108481	D3Z8L7	RRAS_RAT	RRAS_RAT Ras-related protein R-Ras OS=Rattus norvegicus (Rat) GN=Rras PE=1 SV=1	Rras	361568	Ras-related protein R-Ras	7.70588	0.0986682	8.08113	0.0620006	8.1496	0.0165723	1.29706	1.29706	1.3601	1.3601	1.0486	1.0486	0.0468514	0.169318	0.00753986	0.019	0.0087	0.7599
10706712	Nosip	NM_001106260	D3ZH12	D3ZH12_RAT	D3ZH12_RAT Nitric oxide synthase-interacting protein OS=Rattus norvegicus (Rat) GN=Nosip PE=1 SV=1	Nosip	292894	Nitric oxide synthase-interacting protein	7.95409	0.0764714	7.77892	0.0329633	7.53371	0.0458598	0.885668	0.885668	0.747228	0.747228	0.843688	0.843688	0.967254	0.48909	0.00491019	0.1454	0.0041	0.0445
10706722	---	rno-mir-150	---	---	---	---	---	---	6.82077	0.125498	6.80074	0.02394	6.80664	0.0180463	0.986214		0.990251		1.00409		0.0433721	0.0295568	0.974872	0.9739	0.9866	0.9978
10706724	Pih1d1	NM_001024868	Q4V7F5	PIHD1_RAT	PIHD1_RAT PIH1 domain-containing protein 1 OS=Rattus norvegicus (Rat) GN=Pih1d1 PE=1 SV=1	Pih1d1	292898	PIH1 domain-containing protein 1	6.5984	0.0199787	6.44115	0.098866	6.8327	0.105891	0.896731	0.896731	1.17633	1.17633	1.3118	1.3118	0.199948	0.174053	0.0480025	0.4483	0.2115	0.0415
10706734	Slc17a7	NM_053859	Q62634	VGLU1_RAT	VGLU1_RAT Vesicular glutamate transporter 1 OS=Rattus norvegicus (Rat) GN=Slc17a7 PE=1 SV=1	Slc17a7	116638	Vesicular glutamate transporter 1	5.18503	0.0325116	5.19882	0.112803	5.24627	0.0430438	1.0096	1.0096	1.04336	1.04336	1.03344	1.03344	0.449771	0.238892	0.836293	0.9854	0.8314	0.9069
10706747	Pth2	NM_001109144	G3V8S3	G3V8S3_RAT	G3V8S3_RAT Similar to tuberoinfundibular 39 residue protein (Predicted) OS=Rattus norvegicus (Rat) GN=Pth2 PE=4 SV=1	Pth2	499149	Similar to tuberoinfundibular 39 residue protein (Predicted)	6.94151	0.0554554	6.63555	0.064623	6.5887	0.0671832	0.808902	0.808902	0.783058	0.783058	0.96805	0.96805	0.387178	0.968176	0.0138528	0.0313	0.0163	0.8406
10706750	Tead2	NM_001107512	B5DF69	B5DF69_RAT	B5DF69_RAT Protein Tead2 OS=Rattus norvegicus (Rat) GN=Tead2 PE=2 SV=1	Tead2	308582	Protein Tead2	6.15759	0.0617914	6.16064	0.116483	6.0898	0.0635708	1.00212	1.00212	0.954104	0.954104	0.952087	0.952087	0.580753	0.648895	0.810379	0.9996	0.8468	0.8329
10706759	---	ENSRNOT00000047622	---	---	---	---	---	---	4.80312	0	4.70803	0.0915272	4.93236	0.0701445	0.936216		1.09372		1.16823		0.0226014	0	0.136743	0.6222	0.4002	0.1215
10706775	RGD1562492	NM_001109146	B5DF42	B5DF42_RAT	B5DF42_RAT Transporter OS=Rattus norvegicus (Rat) GN=RGD1562492 PE=2 SV=1	RGD1562492	499151	Transporter	4.88058	0.0877963	5.00143	0.0576711	4.87123	0.0774976	1.08737	1.08737	0.993539	0.993539	0.913706	0.913706	0.274201	0.878594	0.424768	0.5023	0.9979	0.4704
10706792	Hrc	NM_181369	Q80W59	Q80W59_RAT	Q80W59_RAT Histidine-rich calcium binding protein OS=Rattus norvegicus (Rat) GN=Hrc PE=2 SV=1	Hrc	292905	Histidine-rich calcium binding protein	11.4002	0.0173075	11.2727	0.0265278	10.4154	0.0541235	0.915399	0.915399	0.505317	0.505317	0.552018	0.552018	0.0062144	0.320964	2.8549e-06	0.1222	0	0
10706801	---	ENSRNOT00000056223	---	---	---	---	---	---	6.19617	0.0350215	6.26228	0.0457522	6.06901	0.0548033	1.04689		0.915633		0.874618		0.510529	0.904127	0.0647075	0.6153	0.2034	0.0588
10706804	Kcna7	NM_001108914	D4A810	D4A810_RAT	D4A810_RAT Potassium voltage-gated channel, shaker-related subfamily, member 7 (Predicted) OS=Rattus norvegicus (Rat) GN=Kcna7 PE=4 SV=1	Kcna7	365241	Potassium voltage-gated channel, shaker-related subfamily, member 7 (Predicted)	8.69177	0.0493799	9.1522	0.213627	8.63693	0.0654826	1.37595	1.37595	0.962698	0.962698	0.699662	0.699662	0.0208778	0.137494	0.061582	0.1073	0.951	0.073
10706807	Ntf4	NM_013184	P34131	NTF4_RAT	NTF4_RAT Neurotrophin-4 OS=Rattus norvegicus (Rat) GN=Ntf4 PE=2 SV=1	Ntf4	25730	Neurotrophin-4	6.64476	0.11052	6.45322	0.022896	6.19239	0.0676831	0.875672	0.875672	0.73084	0.73084	0.834605	0.834605	0.745239	0.218228	0.0168351	0.2561	0.0141	0.1183
10706810	Lhb	NM_012858	A0A0A0MY50	A0A0A0MY50_RAT	A0A0A0MY50_RAT Luteinizing hormone beta subunit OS=Rattus norvegicus (Rat) GN=Lhb PE=3 SV=2	Lhb	25329	Luteinizing hormone beta subunit	6.05387	0.037706	6.09932	0.0345861	6.03661	0.0359387	1.03201	1.03201	0.988106	0.988106	0.95746	0.95746	0.420974	0.997101	0.496653	0.643	0.9621	0.4977
10706820	Gys1	BC131849	A2RRU1	GYS1_RAT	GYS1_RAT Glycogen [starch] synthase, muscle OS=Rattus norvegicus (Rat) GN=Gys1 PE=1 SV=1	Gys1	690987	Glycogen [starch] synthase, muscle	10.8387	0.0743897	10.3399	0.131597	8.80072	0.185611	0.70768	0.70768	0.243497	0.243497	0.344077	0.344077	0.10852	0.555094	0.000110767	0.0941	0.0001	0.0005
10706836	---	XM_001065880	---	---	---	---	---	---	7.80832	0.130371	8.44526	0.0620745	9.36105	0.0139656	1.55503		2.93371		1.88659		0.220789	0.0738826	4.07658e-05	0.0043	0	0.0007
10706838	Tulp2	NM_001012168	Q5XFX6	Q5XFX6_RAT	Q5XFX6_RAT Tubby-like protein OS=Rattus norvegicus (Rat) GN=Tulp2 PE=2 SV=1	Tulp2	361576	Tubby-like protein	4.97992	0	5.03858	0.0682703	5.00095	0.0125189	1.04149	1.04149	1.01468	1.01468	0.974258	0.974258	0.196762	0	0.584817	0.5678	0.9337	0.7671
10706852	Plekha4	NM_199101	P60669	PKHA4_RAT	PKHA4_RAT Pleckstrin homology domain-containing family A member 4 OS=Rattus norvegicus (Rat) GN=Plekha4 PE=2 SV=1	Plekha4	308584	Pleckstrin homology domain-containing family A member 4	6.28778	0.0495148	6.24323	0.00487933	6.23145	0.0166623	0.96959	0.96959	0.961704	0.961704	0.991866	0.991866	0.000498216	0.066284	0.43443	0.5649	0.446	0.9716
10706875	Hsd17b14	ENSRNOT00000028436	D4A4Y2	D4A4Y2_RAT	D4A4Y2_RAT Protein Hsd17b14 OS=Rattus norvegicus (Rat) GN=Hsd17b14 PE=3 SV=2	Hsd17b14	691018	Protein Hsd17b14	4.36903	0.0400522	4.43201	0.0871917	4.20045	0.0897376	1.04462	1.04462	0.889717	0.889717	0.85171	0.85171	0.421914	0.570933	0.170718	0.8494	0.3299	0.1667
10706884	Bcat2	NM_022400	O35854	BCAT2_RAT	BCAT2_RAT Branched-chain-amino-acid aminotransferase, mitochondrial OS=Rattus norvegicus (Rat) GN=Bcat2 PE=1 SV=1	Bcat2	64203	Branched-chain-amino-acid aminotransferase, mitochondrial	8.43385	0.061692	9.46848	0.0984963	8.83786	0.0379776	2.04859	2.04859	1.32318	1.32318	0.645896	0.645896	0.402524	0.511474	0.000144912	0.0001	0.0156	0.0019
10706895	Fut1	NM_031236	Q10980	FUT1_RAT	FUT1_RAT Galactoside 2-alpha-L-fucosyltransferase 1 OS=Rattus norvegicus (Rat) GN=Fut1 PE=2 SV=2	Fut1	81919	Galactoside 2-alpha-L-fucosyltransferase 1	4.24323	0.017141	4.33786	0.0777563	4.19177	0.0394163	1.06779	1.06779	0.964964	0.964964	0.903698	0.903698	0.234623	0.239339	0.211455	0.4608	0.7587	0.1946
10706898	Izumo1	NM_001017514	Q6AY06	IZUM1_RAT	IZUM1_RAT Izumo sperm-egg fusion protein 1 OS=Rattus norvegicus (Rat) GN=Izumo1 PE=1 SV=1	Izumo1	499152	Izumo sperm-egg fusion protein 1	4.66326	0.0315156	4.94825	0.163673	4.56175	0.149068	1.2184	1.2184	0.93206	0.93206	0.764986	0.764986	0.214441	0.195936	0.174013	0.3385	0.8442	0.1691
10706909	Rasip1	NM_001106261	B5DF05	B5DF05_RAT	B5DF05_RAT Protein Rasip1 OS=Rattus norvegicus (Rat) GN=Rasip1 PE=1 SV=1	Rasip1	292912	Protein Rasip1	7.08383	0.0246969	7.33588	0.132686	7.10223	0.154035	1.19089	1.19089	1.01283	1.01283	0.850482	0.850482	0.694481	0.13165	0.311411	0.3477	0.9921	0.3991
10706922	Mamstr	ENSRNOT00000029167	D3ZHU3	D3ZHU3_RAT	D3ZHU3_RAT Protein Mamstr OS=Rattus norvegicus (Rat) GN=Mamstr PE=4 SV=1	Mamstr	691041	Protein Mamstr	7.52556	0.109604	6.57738	0.02118	4.80837	0.173232	0.518286	0.518286	0.152071	0.152071	0.293411	0.293411	0.151102	0.0873477	1.01234e-05	0.0032	0	0.0001
10706933	---	XM_001080773	---	---	---	---	---	---	4.841	0.0473501	4.74046	0.0332882	4.65722	0.0540229	0.932684		0.880392		0.943934		0.681879	0.847236	0.0784215	0.3191	0.0678	0.4789
10706941	Car11	NM_175708	Q811X3	Q811X3_RAT	Q811X3_RAT Carbonic anhydrase 11 OS=Rattus norvegicus (Rat) GN=Car11 PE=2 SV=1	Car11	308588	Carbonic anhydrase 11	7.48456	0.0329362	7.911	0.162603	7.35099	0.071393	1.34391	1.34391	0.911574	0.911574	0.678299	0.678299	0.135469	0.158958	0.0219526	0.0644	0.6627	0.022
10706953	Dbp	NM_012543	P16443	DBP_RAT	DBP_RAT D site-binding protein OS=Rattus norvegicus (Rat) GN=Dbp PE=1 SV=2	Dbp	24309	D site-binding protein	9.14505	0.340848	8.92787	0.1432	8.09173	0.116479	0.860242	0.860242	0.481859	0.481859	0.560143	0.560143	0.768252	0.325957	0.0355077	0.7822	0.037	0.0862
10706963	Rpl18	NM_031102	P12001	RL18_RAT	RL18_RAT 60S ribosomal protein L18 OS=Rattus norvegicus (Rat) GN=Rpl18 PE=1 SV=2	Rpl18	81766	60S ribosomal protein L18	10.4336	0.0327393	10.4679	0.19887	10.4333	0.0316121	1.02406	1.02406	0.999762	0.999762	0.976273	0.976273	0.0529503	0.0291002	0.973718	0.9782	1	0.9782
10706968	Fam83e	ENSRNOT00000028564	D3ZT45	D3ZT45_RAT	D3ZT45_RAT Protein Fam83e OS=Rattus norvegicus (Rat) GN=Fam83e PE=1 SV=1	Fam83e	292913	Protein Fam83e	5.48229	0.0423821	5.40214	0.0966202	5.31154	0.00829681	0.945956	0.945956	0.888381	0.888381	0.939136	0.939136	0.542904	0.0229983	0.217529	0.6489	0.1949	0.5632
10706974	---	D37934	Q63003	5E5_RAT	5E5_RAT 5E5 antigen OS=Rattus norvegicus (Rat) PE=2 SV=1	---	---	5E5 antigen	5.69922	0.0674575	5.76906	0.0876923	5.61373	0.0740302	1.0496	1.0496	0.942465	0.942465	0.897929	0.897929	0.873854	0.956744	0.402291	0.7897	0.7228	0.3736
10706988	Kdelr1	NM_001017385	Q569A6	ERD21_RAT	ERD21_RAT ER lumen protein-retaining receptor 1 OS=Rattus norvegicus (Rat) GN=Kdelr1 PE=2 SV=1	Kdelr1	361577	ER lumen protein-retaining receptor 1	9.22743	0.0774696	9.901	0.198087	9.69875	0.0779857	1.59501	1.59501	1.38637	1.38637	0.869194	0.869194	0.730387	0.365143	0.0265647	0.0246	0.0951	0.5452
10706994	Tmem143	NM_001107513	D3ZSD8	D3ZSD8_RAT	D3ZSD8_RAT Protein Tmem143 OS=Rattus norvegicus (Rat) GN=Tmem143 PE=1 SV=1	Tmem143	308593	Protein Tmem143	9.12356	0.0777816	8.67547	0.0310354	8.16378	0.0532755	0.733012	0.733012	0.514139	0.514139	0.701405	0.701405	0.534517	0.565858	6.28926e-05	0.0033	0	0.0017
10707003	Ccdc114	NM_001126277	B1H228	CC114_RAT	CC114_RAT Coiled-coil domain-containing protein 114 OS=Rattus norvegicus (Rat) GN=Ccdc114 PE=1 SV=1	Ccdc114	308594	Coiled-coil domain-containing protein 114	4.43992	0.0392943	4.44715	0.0727529	4.40444	0.00745254	1.00503	1.00503	0.975707	0.975707	0.970828	0.970828	0.17421	0.0876638	0.800925	0.9948	0.8583	0.8096
10707019	Nomo1	NM_001108484	D3ZSA9	D3ZSA9_RAT	D3ZSA9_RAT Protein Nomo1 OS=Rattus norvegicus (Rat) GN=Nomo1 PE=1 SV=1	Nomo1	361578	Protein Nomo1	10.1775	0.0464054	10.2902	0.195607	10.6819	0.191921	1.0812	1.0812	1.41852	1.41852	1.31199	1.31199	0.799107	0.238169	0.148818	0.8746	0.1497	0.2796
10707051	Otog	NM_001106262	D3ZCV6	D3ZCV6_RAT	D3ZCV6_RAT Otogelin (Predicted) OS=Rattus norvegicus (Rat) GN=Otog PE=4 SV=1	Otog	292918	Otogelin (Predicted)	5.09062	0.0398653	5.01587	0.0377383	5.05924	0.0429617	0.94951	0.94951	0.978481	0.978481	1.03051	1.03051	0.797572	0.981816	0.480463	0.4543	0.8627	0.7407
10707109	Myod1	NM_176079	Q02346	MYOD1_RAT	MYOD1_RAT Myoblast determination protein 1 OS=Rattus norvegicus (Rat) GN=Myod1 PE=3 SV=1	Myod1	337868	Myoblast determination protein 1	9.16392	0.353243	9.07815	0.255758	5.99664	0.187019	0.942278	0.942278	0.111315	0.111315	0.118134	0.118134	0.057155	0.725912	0.00027706	0.9731	0.0005	0.0005		Muscle development
10707113	Kcnc1	NM_012856	P25122	KCNC1_RAT	KCNC1_RAT Potassium voltage-gated channel subfamily C member 1 OS=Rattus norvegicus (Rat) GN=Kcnc1 PE=1 SV=1	Kcnc1	25327	Potassium voltage-gated channel subfamily C member 1	7.10322	0.114672	6.61785	0.13339	6.2801	0.0796278	0.714313	0.714313	0.565218	0.565218	0.791275	0.791275	0.655189	0.793076	0.00574932	0.0496	0.0048	0.1613
10707121	Gtf2h1	NM_001108485	D3ZYG3	D3ZYG3_RAT	D3ZYG3_RAT General transcription factor II H, polypeptide 1 (Predicted), isoform CRA_b OS=Rattus norvegicus (Rat) GN=Gtf2h1 PE=1 SV=1	Gtf2h1	361580	General transcription factor II H, polypeptide 1 (Predicted), isoform CRA_b	8.07386	0.0489299	8.35293	0.0315086	9.38296	0.0450155	1.21341	1.21341	2.47787	2.47787	2.04208	2.04208	0.025618	0.897075	1.50782e-06	0.0091	0	0
10707137	Ldha	NM_017025	B5DEN4	B5DEN4_RAT	B5DEN4_RAT L-lactate dehydrogenase OS=Rattus norvegicus (Rat) GN=Ldha PE=1 SV=1	Ldha	24533	L-lactate dehydrogenase	12.592	0.0742758	12.1276	0.12009	9.90989	0.0287448	0.724777	0.818285	0.155812	0.234924	0.214979	0.279698	0.00860905	0.279183	1.09645e-06	0.0191	0	0			Glycolysis
10707142	Ldhc	NM_017266	Q6AYX2	Q6AYX2_RAT	Q6AYX2_RAT L-lactate dehydrogenase OS=Rattus norvegicus (Rat) GN=Ldhc PE=2 SV=1	Ldhc	29634	L-lactate dehydrogenase	4.20367	0.0275625	4.18829	0.0352446	4.2492	0.025781	0.989394	0.989394	1.03206	1.03206	1.04312	1.04312	0.104214	0.950017	0.385735	0.9156	0.577	0.3764
10707151	Tmem86a	ENSRNOT00000018688	D3ZI62	D3ZI62_RAT	D3ZI62_RAT Protein Tmem86a OS=Rattus norvegicus (Rat) GN=Tmem86a PE=4 SV=1	Tmem86a	308602	Protein Tmem86a	5.69288	0.0760222	5.8705	0.173529	7.28029	0.0431064	1.13102	1.13102	3.00509	3.00509	2.65699	2.65699	0.0175319	0.222981	0.000107668	0.5306	0.0001	0.0003
10707154	Mrgprb5	NM_001002284	Q7TN44	MRGB5_RAT	MRGB5_RAT Mas-related G-protein coupled receptor member B5 OS=Rattus norvegicus (Rat) GN=Mrgprb5 PE=2 SV=1	Mrgprb5	404644	Mas-related G-protein coupled receptor member B5	3.08088	0.005407	3.1281	0.128498	3.09218	0.0427044	1.03327	1.03327	1.00786	1.00786	0.975411	0.975411	0.0729492	0.0150574	0.907953	0.9085	0.9955	0.9421
10707156	Zdhhc13	NM_001039037	Q2TGJ6	Q2TGJ6_RAT	Q2TGJ6_RAT Palmitoyltransferase OS=Rattus norvegicus (Rat) GN=Zdhhc13 PE=2 SV=1	Zdhhc13	365252	Palmitoyltransferase	6.54191	0.188976	6.48797	0.234666	7.51092	0.0977568	0.963298	0.963298	1.95749	1.95749	2.03208	2.03208	0.575933	0.557856	0.0125566	0.9768	0.0223	0.0176
10707175	---	XR_009416	---	---	---	---	---	---	11.2171	0.0519269	11.4826	0.134765	11.6145	0.0123127	1.20202		1.31712		1.09575		0.418554	0.0507561	0.0383258	0.1379	0.0347	0.5462
10707177	Nav2	ENSRNOT00000046529	F1LR12	F1LR12_RAT	F1LR12_RAT Protein Nav2 OS=Rattus norvegicus (Rat) GN=Nav2 PE=1 SV=2	Nav2	171563	Protein Nav2	7.14134	0.0944818	6.31548	0.125446	6.12865	0.113102	0.564146	0.564146	0.495619	0.495619	0.87853	0.87853	0.215183	0.93517	0.00143383	0.0045	0.0016	0.5129
10707225	---	ENSRNOT00000050109	---	---	---	---	---	---	5.52101	0.0639971	5.48505	0	5.48505	0	0.975379		0.975379		1		0.0105681	0	0.821656	0.8494	0.8494	1
10707228	---	ENSRNOT00000041040	---	---	---	---	---	---	4.43917	0.0248305	4.60439	0.0501256	4.17301	0.0985624	1.12134		0.831531		0.741551		0.304229	0.261145	0.00961122	0.256	0.0619	0.0082
10707230	Htatip2	NM_001106263	B0BNF8	B0BNF8_RAT	B0BNF8_RAT HIV-1 tat interactive protein 2, homolog (Human) OS=Rattus norvegicus (Rat) GN=Htatip2 PE=2 SV=1	Htatip2	292935	HIV-1 tat interactive protein 2, homolog (Human)	7.0872	0.0569065	7.62458	0.001691	8.75023	0.140766	1.45134	1.45134	3.16681	3.16681	2.18199	2.18199	0.140052	0.00505226	3.01675e-05	0.0118	0	0.0002
10707237	Prmt3	NM_053557	O70467	ANM3_RAT	ANM3_RAT Protein arginine N-methyltransferase 3 OS=Rattus norvegicus (Rat) GN=Prmt3 PE=1 SV=1	Prmt3	89820	Protein arginine N-methyltransferase 3	8.49273	0.0472468	8.63344	0.118142	9.28378	0.154684	1.10245	1.10245	1.73033	1.73033	1.56954	1.56954	0.140319	0.382795	0.00609859	0.6724	0.0067	0.0171
10707254	---	ENSRNOT00000053255	---	---	---	---	---	---	2.91512	0.0247171	2.91208	0.033001	3.15828	0.106595	0.9979		1.18358		1.18607		0.00315931	0.149325	0.0601273	1	0.0851	0.0851
10707256	Slc6a5	NM_203334	P58295	SC6A5_RAT	SC6A5_RAT Sodium- and chloride-dependent glycine transporter 2 OS=Rattus norvegicus (Rat) GN=Slc6a5 PE=1 SV=1	Slc6a5	171148	Sodium- and chloride-dependent glycine transporter 2	4.76331	0.0210801	4.84631	0.0823547	4.7512	0.0127523	1.05922	1.05922	0.991646	0.991646	0.936203	0.936203	6.53297e-05	0.0383843	0.413959	0.5297	0.9805	0.4339
10707275	Nell1	NM_031069	Q62919	NELL1_RAT	NELL1_RAT Protein kinase C-binding protein NELL1 OS=Rattus norvegicus (Rat) GN=Nell1 PE=2 SV=2	Nell1	81733	Protein kinase C-binding protein NELL1	5.24129	0.0177228	5.20512	0.0850669	5.16046	0.0226889	0.975245	0.975245	0.945512	0.945512	0.969513	0.969513	0.963523	0.0991055	0.570673	0.8701	0.5432	0.8248
10707297	---	BC098006	Q4QQT5	IDHG2_RAT	IDHG2_RAT Probable isocitrate dehydrogenase [NAD] gamma 2, mitochondrial OS=Rattus norvegicus (Rat) PE=2 SV=1	---	103690168	Probable isocitrate dehydrogenase [NAD] gamma 2, mitochondrial	3.97977	0.164663	3.71777	0.100533	3.85315	0.023207	0.833929	0.833929	0.915973	0.915973	1.09838	1.09838	0.00808156	0.118924	0.330561	0.3026	0.7183	0.6946
10707299	---	ENSRNOT00000021365	---	---	---	---	---	---	6.18067	0.0304335	6.40415	0.123358	6.74465	0.0721693	1.16755		1.47834		1.26619		0.165512	0.295925	0.00922412	0.2299	0.0078	0.0648
10707301	---	ENSRNOT00000054421	---	---	---	---	---	---	10.5034	0.195325	10.9275	0.0856223	12.057	0.0349393	1.34172		2.93537		2.18777		0.12424	0.156573	0.000305136	0.1125	0.0003	0.0017
10707303	Ano5	XR_009422	F1LZ77	F1LZ77_RAT	F1LZ77_RAT Anoctamin OS=Rattus norvegicus (Rat) GN=Ano5	Ano5	308637	Anoctamin	10.9818	0.0313344	10.6688	0.089002	8.90624	0.0446168	0.804948	0.804948	0.237241	0.237241	0.294729	0.294729	0.00555188	0.415846	6.99793e-07	0.0256	0	0
10707325	Slc17a6	NM_053427	Q9JI12	VGLU2_RAT	VGLU2_RAT Vesicular glutamate transporter 2 OS=Rattus norvegicus (Rat) GN=Slc17a6 PE=1 SV=1	Slc17a6	84487	Vesicular glutamate transporter 2	3.4997	0.0575729	3.56377	0.031821	3.55421	0.0237674	1.04541	1.04541	1.03851	1.03851	0.993395	0.993395	0.0485274	0.522161	0.528157	0.5433	0.6406	0.9833
10707338	Gas2	NM_001127504	G3V857	G3V857_RAT	G3V857_RAT Protein Gas2 OS=Rattus norvegicus (Rat) GN=Gas2 PE=1 SV=1	Gas2	499156	Protein Gas2	6.11879	0.0676731	6.22878	0.205756	5.9516	0.0645802	1.07922	1.07922	0.890575	0.890575	0.825201	0.825201	0.0438045	0.225028	0.386319	0.8204	0.6722	0.3604
10707348	---	XM_001053624	---	---	---	---	---	---	3.42872	0.0199778	3.48482	0.054808	3.41532	0.00414967	1.03965		0.990755		0.952967		0.000242316	0.0225463	0.381852	0.5274	0.9566	0.388
10707350	---	ENSRNOT00000054247	---	---	---	---	---	---	3.94556	0.0132576	4.07301	0.127265	3.74431	0.0995288	1.09236		0.869794		0.796253		0.884333	0.0750708	0.115433	0.6279	0.341	0.1031
10707352	---	ENSRNOT00000056014	F1M4X5	F1M4X5_RAT	F1M4X5_RAT Uncharacterized protein OS=Rattus norvegicus (Rat) PE=4 SV=3	---	---	Uncharacterized protein	4.86376	0.000464	4.87139	0.0165848	4.89274	0.139941	1.0053	1.0053	1.02029	1.02029	1.01491	1.01491	0.00692499	0	0.956615	0.9958	0.9547	0.9774
10707355	---	ENSRNOT00000052796	---	---	---	---	---	---	2.77676	3.14018e-16	2.76058	0.0161757	2.72385	0.0414077	0.988851		0.963994		0.974864		0.00179221	0	0.334039	0.8895	0.3224	0.5389
10707357	---	ENSRNOT00000032867	---	---	---	---	---	---	4.11117	0.113368	3.8832	0.0199868	3.95549	0.011919	0.853836		0.89771		1.05138		0.00532821	0.0205133	0.118149	0.1095	0.2961	0.7217
10707368	---	ENSRNOT00000056007	---	---	---	---	---	---	2.42813	0.0218115	2.45619	0.0464967	2.50345	0.0411112	1.01964		1.05359		1.0333		0.680988	0.580509	0.458975	0.8725	0.4352	0.7066
10707370	---	XR_007098	---	---	---	---	---	---	4.60993	0.149136	4.60675	0.0715749	4.40394	0.059214	0.997802		0.866945		0.868854		0.366286	0.426042	0.325916	0.9997	0.3812	0.3914
10707374	---	XR_007351	---	---	---	---	---	---	6.35183	0.0393464	6.21404	0.0467803	6.30343	0.129763	0.908911		0.967008		1.06392		0.696167	0.264139	0.518031	0.4972	0.9058	0.734
10707376	---	ENSRNOT00000054306	---	---	---	---	---	---	5.67965	0.190775	5.32699	0.123882	5.06581	0.120777	0.783137		0.653455		0.834407		0.448997	0.794278	0.0680444	0.2857	0.0587	0.4676
10707378	---	ENSRNOT00000042080	---	---	---	---	---	---	4.8357	0	4.95168	0.114472	4.79266	0.0430393	1.08371		0.970608		0.895634		0.000404286	0	0.334523	0.5275	0.9024	0.3258
10707386	---	ENSRNOT00000032154	---	---	---	---	---	---	9.82605	0.0785556	9.15368	0.112386	7.60519	0.0901414	0.627474		0.214513		0.341867		0.0979597	0.918547	8.29218e-06	0.0056	0	0.0001
10707388	Tubgcp5	NM_001107516	D4A2A9	D4A2A9_RAT	D4A2A9_RAT Protein Tubgcp5 OS=Rattus norvegicus (Rat) GN=Tubgcp5 PE=1 SV=3	Tubgcp5	308663	Protein Tubgcp5	7.91811	0.0133842	7.93756	0.183436	8.45206	0.0494543	1.01357	1.01357	1.44789	1.44789	1.4285	1.4285	0.716489	0.0166839	0.0228677	0.9909	0.0322	0.0375
10707416	Dynll1	ENSRNOT00000014910	P63170	DYL1_RAT	DYL1_RAT Dynein light chain 1, cytoplasmic OS=Rattus norvegicus (Rat) GN=Dynll1 PE=1 SV=1	Dynll1	58945	Dynein light chain 1, cytoplasmic	5.71345	0.148554	5.75668	0.144216	4.69835	0.0823363	1.03041	1.03041	0.494792	0.404697	0.480187	0.400379	0.167386	0.749025	0.00173909	0.9735	0.0033	0.0027
10707418	Cyfip1	NM_001107517	D4A8H8	D4A8H8_RAT	D4A8H8_RAT Cytoplasmic FMR1 interacting protein 1 (Predicted) OS=Rattus norvegicus (Rat) GN=Cyfip1 PE=1 SV=1	Cyfip1	308666	Cytoplasmic FMR1 interacting protein 1 (Predicted)	8.98484	0.00793972	9.01466	0.0845331	9.21595	0.0449561	1.02088	1.02088	1.17373	1.17373	1.14972	1.14972	0.946358	0.0726086	0.0511944	0.9236	0.0592	0.0959
10707453	---	ENSRNOT00000018172	---	---	---	---	---	---	5.55209	0.151509	5.31794	0.0210941	5.35471	0.0194799	0.850184		0.872132		1.02582		0.000318185	0.0187915	0.214596	0.2287	0.3268	0.9541
10707455	Herc2	NM_001107520	D4ACN3	D4ACN3_RAT	D4ACN3_RAT Hect (Homologous to the E6-AP (UBE3A) carboxyl terminus) domain and RCC1 (CHC1)-like domain (RLD) 2 (Predicted) OS=Rattus norvegicus (Rat) GN=Herc2 PE=1 SV=2	Herc2	308669	Hect (Homologous to the E6-AP (UBE3A) carboxyl terminus) domain and RCC1 (CHC1)-like domain (RLD) 2 (Predicted)	9.26178	0.073533	9.17503	0.137528	9.10258	0.0538655	0.94164	0.94164	0.895521	0.895521	0.951022	0.951022	0.512766	0.492789	0.515629	0.7887	0.4875	0.8524
10707548	Oca2	AB191343	Q4LEV3	Q4LEV3_RAT	Q4LEV3_RAT Pink-eyed dilution OS=Rattus norvegicus (Rat) GN=Oca2 PE=2 SV=1	Oca2	100365773	Pink-eyed dilution	4.0886	0.0136993	4.1097	0.0332126	4.21539	0.0568931	1.01474	1.01474	1.09186	1.09186	1.076	1.076	0.125101	0.319348	0.122604	0.9311	0.133	0.2105
10707572	---	ENSRNOT00000032326	---	---	---	---	---	---	6.6615	0.142764	6.13963	0.0567277	6.03399	0.0846101	0.696467		0.647294		0.929397		0.17989	0.498994	0.00960434	0.0251	0.0107	0.7332
10707575	---	ENSRNOT00000055951	---	---	---	---	---	---	3.71475	0.0143893	3.78141	0.0302494	3.73537	0.0229788	1.04729		1.0144		0.968591		0.230374	0.567715	0.243007	0.2376	0.8819	0.4209
10707580	---	ENSRNOT00000041845	---	---	---	---	---	---	4.14433	0.0931602	4.37069	0.0154427	4.50488	0.0434849	1.16988		1.28392		1.09748		0.510983	0.130053	0.0152447	0.0875	0.0131	0.3144
10707582	Gabrb3	NM_017065	P63079	GBRB3_RAT	GBRB3_RAT Gamma-aminobutyric acid receptor subunit beta-3 OS=Rattus norvegicus (Rat) GN=Gabrb3 PE=1 SV=1	Gabrb3	24922	Gamma-aminobutyric acid receptor subunit beta-3	3.91705	0.0298814	3.93541	0.0457373	3.93548	0.0491493	1.0128	1.0128	1.01285	1.01285	1.00005	1.00005	0.00170812	0.85244	0.940248	0.9425	0.9596	0.9983
10707595	---	ENSRNOT00000020006	---	---	---	---	---	---	3.87411	0.207627	4.04565	0.0783998	4.16064	0.16036	1.12626		1.21969		1.08296		0.994173	0.514727	0.474774	0.7276	0.4497	0.8692
10707597	---	ENSRNOT00000023888	---	---	---	---	---	---	6.01481	0.126814	5.7754	0.119203	5.67845	0.0657634	0.847087		0.792036		0.935012		0.452221	0.668961	0.1478	0.3137	0.1415	0.8056
10707620	---	ENSRNOT00000031110	---	---	---	---	---	---	4.18093	0.0380121	3.85825	0.0906193	3.98076	0.0483812	0.799586		0.870449		1.08862		0.81058	0.473386	0.0283373	0.0245	0.1375	0.3996
10707626	Ube3a	ENSRNOT00000021366	F1M7B8	F1M7B8_RAT	F1M7B8_RAT Protein Ube3a OS=Rattus norvegicus (Rat) GN=Ube3a PE=1 SV=2	Ube3a	361585	Protein Ube3a	10.1231	0.0489863	10.0856	0.27588	10.6919	0.0075544	0.974372	0.974372	1.48329	1.48329	1.5223	1.5223	0.282577	0.00147203	0.0666013	0.9859	0.104	0.0848
10707639	---	ENSRNOT00000046003	---	---	---	---	---	---	2.98718	0.0690684	2.84911	0.24051	2.98785	0.228179	0.908734		1.00047		1.10094		0.47756	0.319085	0.852615	0.876	1	0.876
10707641	---	ENSRNOT00000053261	---	---	---	---	---	---	3.58322	0.0498987	3.79635	0.331053	3.74558	0.123599	1.1592		1.11912		0.965423		0.0118067	0.093488	0.749932	0.7471	0.8443	0.9816
10707643	---	ENSRNOT00000053857	---	---	---	---	---	---	3.39275	0.146917	3.56605	0.19234	3.50195	0.136502	1.12763		1.07863		0.956543		0.942528	0.888958	0.75301	0.7379	0.8814	0.9584
10707645	---	ENSRNOT00000052967	---	---	---	---	---	---	5.83275	0.5539	6.62147	0.374921	6.45597	0.484254	1.72755		1.54031		0.89162		0.546111	0.888384	0.507268	0.5113	0.6449	0.9682
10707647	---	ENSRNOT00000052967	---	---	---	---	---	---	5.83275	0.5539	6.62147	0.374921	6.45597	0.484254	1.72755		1.54031		0.89162		0.546111	0.888384	0.507268	0.5113	0.6449	0.9682
10707649	Ndn	NM_001008558	Q5PPL0	Q5PPL0_RAT	Q5PPL0_RAT Necdin homolog (Mouse) OS=Rattus norvegicus (Rat) GN=Ndn PE=2 SV=1	Ndn	308690	Necdin homolog (Mouse)	5.67118	0.0569629	5.14294	0.123967	4.76078	0.0384486	0.693399	0.693399	0.532036	0.532036	0.767286	0.767286	0.301967	0.302769	0.000665649	0.009	0.0005	0.0373
10707651	Magel2	XM_001054803	D3ZTL5	D3ZTL5_RAT	D3ZTL5_RAT Protein Magel2 OS=Rattus norvegicus (Rat) GN=Magel2 PE=4 SV=2	Magel2	679875	Protein Magel2	5.35216	0.0115923	5.38046	0.03366	5.3917	0.0401686	1.01981	1.01981	1.02778	0.968984	1.00782	0.939958	0.00614606	0.273905	0.669922	0.7901	0.6659	0.9732
10707656	Magel2	ENSRNOT00000013483	D3ZTL5	D3ZTL5_RAT	D3ZTL5_RAT Protein Magel2 OS=Rattus norvegicus (Rat) GN=Magel2 PE=4 SV=2	Magel2	679875	Protein Magel2	5.03781	0.0178233	5.09948	0.121344	4.90203	0.0653355	1.04368	1.04368	0.910183	0.968984	0.872092	0.939958	0.243758	0.108441	0.284532	0.8619	0.4965	0.272
10707658	Hmgn5	BC168165	B4F777	HMGN5_RAT	HMGN5_RAT High mobility group nucleosome-binding domain-containing protein 5 OS=Rattus norvegicus (Rat) GN=Hmgn5 PE=2 SV=1	Hmgn5	681284	High mobility group nucleosome-binding domain-containing protein 5	7.56605	0.0411407	7.37937	0.105165	7.34428	0.0638245	0.878627	0.860964	0.857516	0.83979	0.975973	0.975394	0.4851	0.510633	0.159517	0.2503	0.1756	0.9571
10707662	Otud7a	ENSRNOT00000021068	D4ABZ4	D4ABZ4_RAT	D4ABZ4_RAT Protein Otud7a OS=Rattus norvegicus (Rat) GN=Otud7a PE=1 SV=2	Otud7a	309252	Protein Otud7a	5.02876	0.058683	4.9481	0.076072	4.91829	0.0255687	0.94563	0.94563	0.926286	0.926286	0.979544	0.979544	0.264842	0.383553	0.418751	0.617	0.4065	0.9141
10707675	Trpm1	NM_001037734	Q2WEA5	TRPM1_RAT	TRPM1_RAT Transient receptor potential cation channel subfamily M member 1 OS=Rattus norvegicus (Rat) GN=Trpm1 PE=2 SV=1	Trpm1	361586	Transient receptor potential cation channel subfamily M member 1	5.06186	0.0231542	5.07326	0.108089	4.96027	0.0482508	1.00794	1.00794	0.932006	0.932006	0.924668	0.924668	0.365994	0.189061	0.490471	0.9944	0.5789	0.524
10707705	---	rno-mir-211	---	---	---	---	---	---	6.68849	0.0634342	6.74726	0.138576	6.68521	0.108229	1.04157		0.997727		0.957904		0.624765	0.64393	0.899217	0.9201	0.9997	0.9115
10707707	Mtmr10	ENSRNOT00000021530	G3V810	G3V810_RAT	G3V810_RAT Protein Mtmr10 OS=Rattus norvegicus (Rat) GN=Mtmr10 PE=1 SV=1	Mtmr10	309255	Protein Mtmr10	8.06878	0.0661521	8.32564	0.0965973	8.95275	0.0438605	1.19488	1.19488	1.84544	1.84544	1.54446	1.54446	0.185109	0.574856	0.000335856	0.1026	0.0003	0.002
10707721	Mcee	NM_001106341	D4A197	D4A197_RAT	D4A197_RAT Methylmalonyl CoA epimerase (Predicted), isoform CRA_d OS=Rattus norvegicus (Rat) GN=Mcee PE=1 SV=1	Mcee	293829	Methylmalonyl CoA epimerase (Predicted), isoform CRA_d	9.66594	0.00771557	9.39093	0.125981	10.074	0.0740942	0.826446	0.826446	1.32688	1.32688	1.60553	1.60553	0.420832	0.0391024	0.00349553	0.1286	0.032	0.0029
10707725	Apba2	NM_031780	O35431	APBA2_RAT	APBA2_RAT Amyloid beta A4 precursor protein-binding family A member 2 OS=Rattus norvegicus (Rat) GN=Apba2 PE=1 SV=1	Apba2	83610	Amyloid beta A4 precursor protein-binding family A member 2	3.69413	0.0146187	3.68888	0.0165754	3.79084	0.0791779	0.996367	0.996367	1.06933	1.06933	1.07323	1.07323	6.68476e-05	0.0627686	0.316891	0.9987	0.3879	0.3666
10707740	---	ENSRNOT00000055911	---	---	---	---	---	---	4.83313	0.0981849	5.00503	0.0335198	5.0144	0.103891	1.12654		1.13388		1.00652		0.815354	0.408878	0.291393	0.3684	0.3343	0.9962
10707749	Matr3	ENSRNOT00000026949	A0A0G2JSR7	A0A0G2JSR7_RAT	A0A0G2JSR7_RAT Matrin-3 OS=Rattus norvegicus (Rat) GN=Matr3 PE=1 SV=1	Matr3	29150	Matrin-3	10.3469	0.089601	10.5695	0.0831495	10.5959	0.0140842	1.16686	1.16227	1.18839	1.19485	1.01846	1.02589	0.100084	0.124078	0.0883807	0.1492	0.1017	0.9519
10707751	---	ENSRNOT00000049025	---	---	---	---	---	---	3.33765	0.0642501	3.38701	0.0535228	3.26303	0.0461877	1.03481		0.949593		0.917647		0.485147	0.910919	0.323841	0.8001	0.6068	0.3003
10707756	Tarsl2	NM_001014020	Q5XI17	Q5XI17_RAT	Q5XI17_RAT Protein Tarsl2 OS=Rattus norvegicus (Rat) GN=Tarsl2 PE=2 SV=1	Tarsl2	308701	Protein Tarsl2	9.17301	0.0225504	8.86114	0.130726	9.72272	0.147312	0.805599	0.805599	1.46379	1.46379	1.81702	1.81702	0.640892	0.125244	0.0049929	0.204	0.0344	0.0043
10707779	Tm2d3	NM_001106267	D3ZQU1	D3ZQU1_RAT	D3ZQU1_RAT Protein Tm2d3 OS=Rattus norvegicus (Rat) GN=Tm2d3 PE=1 SV=3	Tm2d3	292995	Protein Tm2d3	7.64004	0.0397546	7.6191	0.00184933	7.65099	0.0240843	0.985586	0.985586	1.00762	1.00762	1.02235	1.02235	0.233127	0	0.74532	0.8673	0.9644	0.7326
10707788	---	ENSRNOT00000015313	---	---	---	---	---	---	3.30116	0.146725	3.01074	0.0481696	3.08908	0.0780187	0.817668		0.863294		1.0558		0.124748	0.390249	0.180996	0.1752	0.3514	0.8423
10707790	Pcsk6	NM_012999	Q63415	PCSK6_RAT	PCSK6_RAT Proprotein convertase subtilisin/kexin type 6 OS=Rattus norvegicus (Rat) GN=Pcsk6 PE=2 SV=1	Pcsk6	25507	Proprotein convertase subtilisin/kexin type 6	6.6787	0.180895	6.7264	0.133294	6.26324	0.0830511	1.03361	1.03361	0.749777	0.749777	0.725396	0.725396	0.577193	0.641821	0.100809	0.9689	0.1608	0.1183
10707812	Snrpa1	ENSRNOT00000016758	D3ZZR5	D3ZZR5_RAT	D3ZZR5_RAT Protein LOC100364748 OS=Rattus norvegicus (Rat) GN=Snrpa1 PE=1 SV=1	Snrpa1	100361269	Protein LOC100364748	7.3346	0.0692007	7.30231	0.0242379	8.01278	0.0398995	0.977864	0.977864	1.60012	1.60012	1.63634	1.63634	0.00691658	0.437992	7.17722e-05	0.9193	0.0001	0.0001
10707824	Vimp	NM_173120	Q8VHV8	SELS_RAT	SELS_RAT Selenoprotein S OS=Rattus norvegicus (Rat) GN=Vimp PE=2 SV=3	Vimp	286900	Selenoprotein S	7.61371	0.0389291	7.86222	0.0393611	8.95712	0.00497214	1.18799	1.18799	2.53752	2.53752	2.13598	2.13598	0.00778652	0.111619	2.41697e-07	0.0046	0	0
10707832	Chsy1	NM_001106268	D3ZRM3	D3ZRM3_RAT	D3ZRM3_RAT Carbohydrate (Chondroitin) synthase 1 (Predicted) OS=Rattus norvegicus (Rat) GN=Chsy1 PE=4 SV=2	Chsy1	292999	Carbohydrate (Chondroitin) synthase 1 (Predicted)	7.06031	0.0346882	6.88868	0.0471119	6.863	0.0596391	0.887839	0.887839	0.872172	0.872172	0.982353	0.982353	0.755532	0.777802	0.0605125	0.1114	0.0693	0.9267
10707837	Lins1	ENSRNOT00000018463	D3ZVQ9	D3ZVQ9_RAT	D3ZVQ9_RAT Uncharacterized protein OS=Rattus norvegicus (Rat) GN=Lins1 PE=4 SV=3	Lins1	308704	Uncharacterized protein	6.87077	0.0333293	6.88931	0.105863	6.99925	0.22004	1.01294	1.01294	1.09314	1.09314	1.07918	1.07918	0.0317524	0.108492	0.796183	0.9962	0.8081	0.8503
10707846	---	ENSRNOT00000055885	---	---	---	---	---	---	2.59348	0	2.59168	0.00179367	2.63692	0.0554727	0.998757		1.03057		1.03185		2.93752e-06	0	0.545667	1	0.6016	0.6016
10707848	Cers3	NM_001127561	B1H294	B1H294_RAT	B1H294_RAT Lass3 protein OS=Rattus norvegicus (Rat) GN=Cers3 PE=2 SV=1	Cers3	499174	Lass3 protein	4.07138	0.152332	3.92085	0.00179533	3.89093	0.028119	0.900915	0.900915	0.882427	0.882427	0.979478	0.979478	8.9979e-06	0	0.367458	0.4944	0.3822	0.9701
10707862	Adamts17	ENSRNOT00000055877	D4ABB3	D4ABB3_RAT	D4ABB3_RAT Protein Adamts17 OS=Rattus norvegicus (Rat) GN=Adamts17 PE=4 SV=3	Adamts17	293004	Protein Adamts17	5.85546	0.1302	5.61194	0.0754252	5.64718	0.0260574	0.84468	0.84468	0.865566	0.865566	1.02473	1.02473	0.0280528	0.207363	0.190559	0.2025	0.3014	0.9448
10707873	Ttc23	NM_001025681	Q4V7F0	TTC23_RAT	TTC23_RAT Tetratricopeptide repeat protein 23 OS=Rattus norvegicus (Rat) GN=Ttc23	Ttc23	308708	Tetratricopeptide repeat protein 23	7.72607	0.0323642	7.2066	0.134918	6.86213	0.0990567	0.697629	0.697629	0.549451	0.549451	0.787598	0.787598	0.233269	0.288544	0.00230773	0.0215	0.0019	0.1083
10707887	---	ENSRNOT00000018974	---	---	---	---	---	---	4.80247	0.000648	4.80962	0.00650433	4.77308	0.109216	1.00497		0.979831		0.974986		0.00152524	0	0.927553	0.997	0.9535	0.9286
10707889	Igf1r	NM_052807	P24062	IGF1R_RAT	IGF1R_RAT Insulin-like growth factor 1 receptor OS=Rattus norvegicus (Rat) GN=Igf1r PE=2 SV=2	Igf1r	25718	Insulin-like growth factor 1 receptor	7.43712	0.0396771	8.30171	0.116505	10.3631	0.0584903	1.82083	1.82083	7.60009	7.60009	4.17398	4.17398	0.036507	0.387708	5.36974e-07	0.0006	0	0		IGF-1/insulin/GH signaling
10707912	Fam169b	ENSRNOT00000040147	F1LYW9	F1LYW9_RAT	F1LYW9_RAT Protein Fam169b OS=Rattus norvegicus (Rat) GN=Fam169b PE=4 SV=3	Fam169b	680906	Protein Fam169b	4.69399	0.052633	4.7532	0.0542245	4.78005	0.0250488	1.0419	1.0419	1.06147	1.06147	1.01878	1.01878	0.51153	0.600405	0.477834	0.6818	0.4615	0.9146
10707925	---	GENSCAN00000023417	---	---	---	---	---	---	6.7604	0.071246	6.61876	0.0212877	6.47743	0.0708827	0.90649		0.821897		0.906681		0.573513	0.376954	0.0440376	0.2948	0.037	0.2948
10707927	---	XR_007940	---	---	---	---	---	---	4.15526	0.0588374	4.04741	0.0800822	3.87891	0.0543485	0.927968		0.825676		0.889768		0.929888	0.875101	0.0612213	0.4958	0.0533	0.2426
10707933	---	ENSRNOT00000047994	---	---	---	---	---	---	4.63577	0.101738	4.62376	0.170009	4.61633	0.0425523	0.99171		0.986613		0.994861		0.499936	0.278358	0.992351	0.9964	0.9919	0.9991
10707935	Rgma	NM_001107524	D4A188	D4A188_RAT	D4A188_RAT Protein Rgma OS=Rattus norvegicus (Rat) GN=Rgma PE=4 SV=1	Rgma	308739	Protein Rgma	7.71085	0.026998	7.90026	0.0452564	7.55621	0.13047	1.14029	1.14029	0.898352	0.898352	0.787825	0.787825	0.320852	0.141179	0.0600878	0.2957	0.4014	0.0512
10707939	Top1	NM_022615	Q9WUL0	TOP1_RAT	TOP1_RAT DNA topoisomerase 1 OS=Rattus norvegicus (Rat) GN=Top1 PE=1 SV=1	Top1	64550	DNA topoisomerase 1	9.31174	0.0425546	9.56386	0.135413	9.92783	0.0417427	1.19095	1.21155	1.53271	1.54561	1.28696	1.27592	0.189677	0.192487	0.00608326	0.1661	0.005	0.0519
10707942	Fam174b	ENSRNOT00000016481	D4A4W1	D4A4W1_RAT	D4A4W1_RAT Protein Fam174b OS=Rattus norvegicus (Rat) GN=Fam174b PE=4 SV=2	Fam174b	681398	Protein Fam174b	6.10622	0.0136737	6.11025	0.017711	5.98016	0.0480336	1.0028	1.0028	0.916335	0.916335	0.913775	0.913775	0.0270725	0.278891	0.0369859	0.9864	0.0602	0.0495
10707945	St8sia2	NM_057156	Q07977	SIA8B_RAT	SIA8B_RAT Alpha-2,8-sialyltransferase 8B OS=Rattus norvegicus (Rat) GN=St8sia2 PE=2 SV=1	St8sia2	117523	Alpha-2,8-sialyltransferase 8B	4.69003	0.104387	4.82791	0.017316	4.76839	0.0283928	1.10029	1.10029	1.05582	1.05582	0.959582	0.959582	0.000875783	0.0842365	0.351545	0.325	0.6596	0.7856
10707951	---	ENSRNOT00000055812	---	---	---	---	---	---	4.48306	0.0317892	4.75528	0.249684	4.56932	0.162695	1.20767		1.06161		0.879062		0.176499	0.103934	0.550009	0.5364	0.9382	0.728
10707953	---	ENSRNOT00000055811	---	---	---	---	---	---	7.56191	0.0367798	7.82663	0.0984871	7.53501	0.083866	1.2014		0.981526		0.816986		0.368492	0.476726	0.0665099	0.1105	0.9671	0.0807
10707961	Akap13	ENSRNOT00000014802	F1M3G7	F1M3G7_RAT	F1M3G7_RAT A kinase (PRKA) anchor protein 13, isoform CRA_b OS=Rattus norvegicus (Rat) GN=Akap13 PE=1 SV=2	Akap13	293024	A kinase (PRKA) anchor protein 13, isoform CRA_b	10.0024	0.0559611	10.1833	0.120734	9.87512	0.194346	1.13361	1.13361	0.91555	0.91555	0.807638	0.807638	0.768915	0.347865	0.334661	0.6374	0.7839	0.3091
10707992	Klhl25	NM_001039006	Q4KLM4	KLH25_RAT	KLH25_RAT Kelch-like protein 25 OS=Rattus norvegicus (Rat) GN=Klhl25 PE=2 SV=1	Klhl25	293023	Kelch-like protein 25	5.98302	0.0809746	5.96149	0.0637853	5.92004	0.069316	0.985188	0.985188	0.957282	0.957282	0.971674	0.971674	0.0247846	0.968009	0.813037	0.9724	0.8019	0.9091
10707995	---	XR_008595	---	---	---	---	---	---	9.60269	0.0886231	9.81738	0.140659	9.94034	0.0248595	1.16045		1.26369		1.08896		0.933294	0.172385	0.119825	0.3247	0.1087	0.6751
10707997	---	ENSRNOT00000055802	---	---	---	---	---	---	8.2722	0.0400447	6.84726	0.0829421	5.11508	0.168018	0.372437		0.112102		0.300995		0.171994	0.239683	3.0155e-06	0.0002	0	0.0001
10708004	Mrps11	NM_001109148	D4A040	D4A040_RAT	D4A040_RAT Protein Mrps11 OS=Rattus norvegicus (Rat) GN=Mrps11 PE=1 SV=1	Mrps11	499185	Protein Mrps11	8.07127	0.0848133	7.37042	0.0868402	6.61142	0.0987431	0.615209	0.733692	0.363531	0.513688	0.590906	0.684954	0.594555	0.976522	9.05047e-05	0.0039	0.0001	0.0026		Ribosome proteins and biogenesis
10708009	---	rno-mir-7a-2	---	---	---	---	---	---	5.52865	0.0334253	5.56754	0.108939	5.5768	0.0310968	1.02732		1.03394		1.00644		0.442148	0.194359	0.865864	0.9126	0.8678	0.9942
10708011	Aen	NM_001108487	B2GUW6	AEN_RAT	AEN_RAT Apoptosis-enhancing nuclease OS=Rattus norvegicus (Rat) GN=Aen PE=2 SV=1	Aen	361594	Apoptosis-enhancing nuclease	7.02443	0.0350223	6.96352	0.040806	7.10242	0.0314562	0.958658	0.958658	1.05555	1.05555	1.10107	1.10107	0.986175	0.95352	0.0731186	0.4731	0.3024	0.0631
10708015	Isg20	NM_001008510	Q5RJP5	Q5RJP5_RAT	Q5RJP5_RAT Interferon stimulated exonuclease 20 OS=Rattus norvegicus (Rat) GN=Isg20 PE=2 SV=1	Isg20	293052	Interferon stimulated exonuclease 20	5.85877	0.0648406	5.75782	0.0269253	5.81353	0.0301186	0.932424	0.932424	0.969134	0.969134	1.03937	1.03937	0.142534	0.455505	0.348737	0.322	0.7797	0.6613
10708021	Acan	NM_022190	P07897	PGCA_RAT	PGCA_RAT Aggrecan core protein OS=Rattus norvegicus (Rat) GN=Acan PE=1 SV=2	Acan	58968	Aggrecan core protein	5.29981	0.0763563	5.21349	0.0547289	5.22487	0.0188843	0.94192	0.94192	0.949381	0.949381	1.00792	1.00792	0.221472	0.235949	0.49006	0.5175	0.5873	0.9909
10708053	Abhd2	NM_001106275	D4A7W1	D4A7W1_RAT	D4A7W1_RAT Abhydrolase domain containing 2 (Predicted) OS=Rattus norvegicus (Rat) GN=Abhd2 PE=1 SV=1	Abhd2	293050	Abhydrolase domain containing 2 (Predicted)	6.56207	0.0928722	6.3934	0.168405	8.02305	0.00611281	0.889662	0.889662	2.75296	2.75296	3.09439	3.09439	0.0153406	0.0117629	8.60035e-05	0.5464	0.0002	0.0001
10708065	---	ENSRNOT00000022606	---	---	---	---	---	---	4.13605	0.273418	3.89829	0.016763	3.84659	0.0518222	0.848065		0.818209		0.964795		0.00219827	0.00716655	0.443385	0.5758	0.4536	0.9706
10708091	---	ENSRNOT00000055694	---	---	---	---	---	---	5.36466	0.05439	5.35882	0.0135447	5.18028	0.113488	0.995958		0.880027		0.883598		0.0191965	0.0760201	0.211098	1	0.2639	0.2639
10708093	Uqcrb	NM_001127553	B2RYS2	B2RYS2_RAT	B2RYS2_RAT Cytochrome b-c1 complex subunit 7 OS=Rattus norvegicus (Rat) GN=Uqcrb PE=1 SV=1	Uqcrb	362897	Cytochrome b-c1 complex subunit 7	12.2017	0.0702958	11.8956	0.0639183	11.5561	0.10324	0.808818	0.780698	0.639214	0.601954	0.790306	0.77075	0.99514	0.780322	0.00425052	0.087	0.0034	0.0584
10708095	Mp68	ENSRNOT00000051411	D3Z9R8	68MP_RAT	68MP_RAT 6.8 kDa mitochondrial proteolipid OS=Rattus norvegicus (Rat) GN=Mp68 PE=1 SV=1	Mp68	---	6.8 kDa mitochondrial proteolipid	10.5416	0.189402	9.80052	0.169164	8.76274	0.095011	0.598302	0.602821	0.291419	0.294467	0.487077	0.488461	0.589345	0.696582	0.000593613	0.0357	0.0005	0.0079
10708097	---	rno-mir-9-3	---	---	---	---	---	---	3.50154	0.107301	3.23022	0.0779139	3.23944	0.0480506	0.828558		0.833874		1.00642		0.210852	0.620631	0.0938863	0.1233	0.1326	0.9982
10708099	Ticrr	ENSRNOT00000031783	D3ZFP6	D3ZFP6_RAT	D3ZFP6_RAT Protein Ticrr OS=Rattus norvegicus (Rat) GN=Ticrr PE=1 SV=3	Ticrr	308768	Protein Ticrr	3.57978	0.0871466	3.61137	0	3.56007	0.036909	1.02213	1.02213	0.986431	0.986431	0.965071	0.965071	0.086229	0	0.818957	0.9233	0.9649	0.8053
10708122	---	BC083836	---	---	---	---	---	---	4.17457	0.0355983	4.18316	0.0625743	4.26852	0.0227847	1.00597		1.06729		1.06095		0.0478707	0.378976	0.323817	0.9858	0.3527	0.4237
10708125	Wdr93	ENSRNOT00000034042	D3ZYU1	D3ZYU1_RAT	D3ZYU1_RAT Protein Wdr93 OS=Rattus norvegicus (Rat) GN=Wdr93 PE=4 SV=2	Wdr93	499189	Protein Wdr93	4.35344	0.117832	4.40497	0.105853	4.48529	0.0808347	1.03637	1.03637	1.0957	1.0957	1.05725	1.05725	0.668531	0.878297	0.674229	0.9212	0.6518	0.8619
10708143	Mesp2	NM_001106273	D3ZXB3	D3ZXB3_RAT	D3ZXB3_RAT Mesoderm posterior 2 (Predicted) OS=Rattus norvegicus (Rat) GN=Mesp2 PE=4 SV=1	Mesp2	293046	Mesoderm posterior 2 (Predicted)	6.2596	0.049394	6.24169	0.0626409	6.17239	0.0208261	0.987659	0.987659	0.94134	0.94134	0.953103	0.953103	0.0173105	0.416177	0.452719	0.953	0.4521	0.6095
10708146	---	ENSRNOT00000021439	---	---	---	---	---	---	6.87185	0.0830815	6.66952	0.0728831	6.43161	0.0731053	0.869145		0.737013		0.847974		0.996526	0.977861	0.0182552	0.2165	0.0151	0.1525
10708152	---	ENSRNOT00000055672	---	---	---	---	---	---	8.7645	0.0657419	8.22258	0.196519	8.00611	0.0489379	0.686856		0.591156		0.86067		0.394161	0.17077	0.0116982	0.0475	0.0109	0.4521
10708154	Sema4b	ENSRNOT00000030914	F1LSV0	F1LSV0_RAT	F1LSV0_RAT Protein Sema4b OS=Rattus norvegicus (Rat) GN=Sema4b PE=1 SV=2	Sema4b	293042	Protein Sema4b	5.82593	0.0428013	5.98771	0.0512533	5.95978	0.0125823	1.11866	1.11866	1.09722	1.09722	0.980829	0.980829	0.482305	0.250418	0.0522022	0.0559	0.1114	0.8517
10708167	---	XM_218822	---	---	---	---	---	---	6.43503	0.102985	6.17571	0.0453544	5.99723	0.116781	0.835481		0.738259		0.883633		0.834761	0.486688	0.0414585	0.1982	0.0356	0.4123
10708170	---	ENSRNOT00000018213	---	---	---	---	---	---	6.70256	0.0736797	6.57172	0.0218703	6.59359	0	0.913298		0.927249		1.01527		0.000715923	0	0.160526	0.1734	0.259	0.9454
10708172	---	XR_008304	---	---	---	---	---	---	4.66909	0.00797595	4.7044	0.0453627	4.70553	0.010371	1.02477		1.02558		1.00079		0.540485	0.0345087	0.555803	0.6368	0.5887	0.996
10708184	Ngrn	NM_001033900	Q3T1H2	NGRN_RAT	NGRN_RAT Neugrin OS=Rattus norvegicus (Rat) GN=Ngrn PE=2 SV=3	Ngrn	499191	Neugrin	7.06718	0.102259	7.07047	0.0463421	7.28725	0.0336986	1.00229	1.00229	1.1648	1.1648	1.16214	1.16214	0.443123	0.324524	0.105723	0.9994	0.1392	0.1455
10708188	Vps33b	NM_022286	Q63616	VP33B_RAT	VP33B_RAT Vacuolar protein sorting-associated protein 33B OS=Rattus norvegicus (Rat) GN=Vps33b PE=2 SV=1	Vps33b	64060	Vacuolar protein sorting-associated protein 33B	6.79715	0.0604698	6.71915	0.142239	6.90133	0.0420336	0.947371	0.947371	1.07489	1.07489	1.1346	1.1346	0.0119313	0.275564	0.42785	0.8281	0.716	0.4005
10708214	Prc1	NM_001107529	D3ZES9	D3ZES9_RAT	D3ZES9_RAT Protein Prc1 OS=Rattus norvegicus (Rat) GN=Prc1 PE=4 SV=1	Prc1	308761	Protein Prc1	5.51776	0.123065	4.90767	0.0418399	4.78591	0.0671734	0.655153	0.655153	0.60213	0.60213	0.919068	0.919068	0.0768922	0.435026	0.00179172	0.0052	0.0021	0.587
10708230	Hddc3	NM_001107528	D4A500	D4A500_RAT	D4A500_RAT HD domain containing 3 (Predicted), isoform CRA_b OS=Rattus norvegicus (Rat) GN=Hddc3 PE=1 SV=1	Hddc3	308758	HD domain containing 3 (Predicted), isoform CRA_b	8.80858	0.106703	8.50752	0.0889575	7.56183	0.153571	0.811656	0.811656	0.421397	0.421397	0.519182	0.519182	0.233965	0.7697	0.000765084	0.254	0.0008	0.0033
10708235	Zscan2	ENSRNOT00000034267	F1M9Z0	F1M9Z0_RAT	F1M9Z0_RAT Protein Zscan2 OS=Rattus norvegicus (Rat) GN=Zscan2 PE=4 SV=2	Zscan2	683603	Protein Zscan2	5.17754	0.0223038	5.18702	0.0269522	5.08642	0.0312337	1.00659	1.00659	0.938791	0.938791	0.932641	0.932641	0.528295	0.917803	0.0779269	0.9401	0.1367	0.089
10708237	Zfp592	NM_001106272	D3ZJG8	D3ZJG8_RAT	D3ZJG8_RAT Protein Zfp592 OS=Rattus norvegicus (Rat) GN=Zfp592 PE=1 SV=1	Zfp592	293038	Protein Zfp592	7.98028	0.0349371	8.29401	0.024186	8.67084	0.0489319	1.24292	1.24292	1.61391	1.61391	1.29849	1.29849	0.539382	0.636011	4.33501e-05	0.0028	0	0.001
10708247	Alpk3	ENSRNOT00000015898	D3ZH28	D3ZH28_RAT	D3ZH28_RAT Protein Alpk3 OS=Rattus norvegicus (Rat) GN=Alpk3 PE=1 SV=2	Alpk3	365298	Protein Alpk3	10.5003	0.0805338	10.3903	0.115749	10.734	0.0792949	0.926584	0.926584	1.17587	1.17587	1.26904	1.26904	0.992633	0.836504	0.0972497	0.7135	0.2516	0.0906
10708262	Slc28a1	NM_053863	Q62674	S28A1_RAT	S28A1_RAT Sodium/nucleoside cotransporter 1 OS=Rattus norvegicus (Rat) GN=Slc28a1 PE=1 SV=1	Slc28a1	116642	Sodium/nucleoside cotransporter 1	5.17598	0.0356201	5.35628	0.0752329	5.05413	0.0910038	1.13312	1.13312	0.919012	0.919012	0.811047	0.811047	0.347781	0.556917	0.0579618	0.2329	0.4898	0.0505
10708281	Pde8a	NM_198767	Q76KC6	Q76KC6_RAT	Q76KC6_RAT Protein Pde8a OS=Rattus norvegicus (Rat) GN=Pde8a PE=1 SV=1	Pde8a	308776	Protein Pde8a	7.17989	0.0125707	7.55135	0.150223	8.17694	0.144749	1.29366	1.29366	1.99592	1.99592	1.54284	1.54284	0.205471	0.0419544	0.00304825	0.1527	0.0026	0.0235
10708304	---	ENSRNOT00000063179	---	---	---	---	---	---	3.73781	0.053706	3.56179	0.0682577	3.5688	0.0216254	0.885138		0.889455		1.00488		0.771272	0.395374	0.0815669	0.1061	0.1195	0.9952
10708306	---	XM_214982	---	---	---	---	---	---	7.12253	0.0557634	7.91387	0.0416004	8.78483	0.0436888	1.73069		3.16521		1.82888		0.156959	0.9365	9.05353e-07	0.0001	0	0
10708322	Fam103a1	NM_001127451	D4AD33	D4AD33_RAT	D4AD33_RAT Protein Fam103a1 OS=Rattus norvegicus (Rat) GN=Fam103a1 PE=1 SV=1	Fam103a1	293058	Protein Fam103a1	5.12332	0.0323527	5.05753	0.088996	5.43534	0.0850688	0.955419	0.955419	1.24144	1.24144	1.29937	1.29937	0.391573	0.448673	0.0219354	0.7832	0.0537	0.0238
10708327	Tm6sf1	NM_001108490	D4A3E7	D4A3E7_RAT	D4A3E7_RAT Protein Tm6sf1 OS=Rattus norvegicus (Rat) GN=Tm6sf1 PE=4 SV=1	Tm6sf1	361600	Protein Tm6sf1	7.68162	0.00703137	7.35889	0.223774	7.12188	0.131949	0.799557	0.799557	0.678422	0.678422	0.848498	0.848498	0.194611	0.0152335	0.0982638	0.3406	0.0861	0.5497
10708338	Sh3gl3	NM_031238	Q9JKT0	Q9JKT0_RAT	Q9JKT0_RAT Endophilin-A3 OS=Rattus norvegicus (Rat) GN=Sh3gl3 PE=1 SV=1	Sh3gl3	81921	Endophilin-A3	4.53549	0.070302	4.45514	0.0964883	4.46341	0.001776	0.945828	0.945828	0.951267	0.951267	1.00575	1.00575	0.0403465	0.0121982	0.671583	0.6912	0.7483	0.9944
10708349	Adamtsl3	NM_001107533	D4ADD4	D4ADD4_RAT	D4ADD4_RAT Protein Adamtsl3 OS=Rattus norvegicus (Rat) GN=Adamtsl3 PE=4 SV=3	Adamtsl3	308787	Protein Adamtsl3	6.61355	0.0290444	6.8817	0.120145	6.5424	0.0898988	1.20427	1.20427	0.951883	0.951883	0.790426	0.790426	0.356315	0.293143	0.0721476	0.1572	0.8282	0.0738
10708379	Eftud1	NM_001107534	D3ZXJ5	D3ZXJ5_RAT	D3ZXJ5_RAT Protein Eftud1 OS=Rattus norvegicus (Rat) GN=Eftud1 PE=1 SV=2	Eftud1	308789	Protein Eftud1	7.54066	0.0171995	7.77342	0.162617	8.2259	0.0719765	1.17508	1.17508	1.60797	1.60797	1.36839	1.36839	0.236114	0.0528938	0.00882511	0.3146	0.0078	0.0472
10708399	Mex3b	ENSRNOT00000039748	D3ZFL6	D3ZFL6_RAT	D3ZFL6_RAT Protein Mex3b OS=Rattus norvegicus (Rat) GN=Mex3b PE=4 SV=2	Mex3b	308790	Protein Mex3b	6.13026	0.142541	6.14763	0.147913	6.03427	0.0263407	1.01211	1.01211	0.935632	0.935632	0.924436	0.924436	0.206693	0.154415	0.791888	0.9947	0.8511	0.8012
10708402	---	ENSRNOT00000055589	---	---	---	---	---	---	3.97566	0.030289	4.01461	0.0520567	4.1258	0.0798891	1.02737		1.10968		1.08012		0.180122	0.483731	0.256602	0.8981	0.2532	0.4277
10708407	Tmc3	ENSRNOT00000037996	D3ZHV6	D3ZHV6_RAT	D3ZHV6_RAT Transmembrane channel-like protein OS=Rattus norvegicus (Rat) GN=Tmc3 PE=3 SV=2	Tmc3	293065	Transmembrane channel-like protein	4.90056	0	4.95409	0.0535243	4.89397	0.006594	1.0378	1.0378	0.99544	0.99544	0.959185	0.959185	2.93752e-06	0	0.385212	0.4875	0.9874	0.4136
10708432	Stard5	ENSRNOT00000015320	D3ZN38	D3ZN38_RAT	D3ZN38_RAT Protein Stard5 OS=Rattus norvegicus (Rat) GN=Stard5 PE=1 SV=1	Stard5	502348	Protein Stard5	6.71355	0.0914184	7.10617	0.144005	7.40829	0.0842337	1.31278	1.31278	1.6186	1.6186	1.23296	1.23296	0.644276	0.754478	0.0117165	0.0965	0.0097	0.2024
10708439	Mesdc2	NM_001008345	Q5U2R7	MESD_RAT	MESD_RAT LDLR chaperone MESD OS=Rattus norvegicus (Rat) GN=Mesdc2 PE=2 SV=1	Mesdc2	308796	LDLR chaperone MESD	7.28769	0.0466556	7.32239	0.123981	7.39633	0.0549497	1.02435	1.02435	1.07821	1.07821	1.05258	1.05258	0.87379	0.382348	0.672036	0.9482	0.6558	0.8276
10708443	Olr10	NM_001000115	D4A4K1	D4A4K1_RAT	D4A4K1_RAT Protein Olr10 OS=Rattus norvegicus (Rat) GN=Olr10 PE=4 SV=1	Olr10	293072	Protein Olr10	3.49541	0.0420895	3.49134	0.0246934	3.49933	0	0.99718	0.99718	1.00272	1.00272	1.00556	1.00556	0.218881	0	0.986364	0.9962	0.9962	0.985
10708445	Olr11	NM_001000114	F1LZI8	F1LZI8_RAT	F1LZI8_RAT Olfactory receptor OS=Rattus norvegicus (Rat) GN=Olr11 PE=3 SV=2	Olr11	293070	Olfactory receptor	4.06191	0.0322066	4.12089	0.117411	4.19387	0.038921	1.04173	1.04173	1.09579	1.09579	1.05189	1.05189	0.94206	0.175812	0.502138	0.8385	0.4734	0.7889
10708447	---	XR_007744	---	---	---	---	---	---	4.85876	0.055637	4.7349	0.0682143	4.81616	0.0608527	0.917734		0.970906		1.05794		0.209631	0.978709	0.410731	0.3939	0.893	0.6299
10708449	---	ENSRNOT00000036482	---	---	---	---	---	---	3.86156	0.124189	3.88612	0.011724	3.84446	0.0361062	1.01717		0.988214		0.971534		0.385664	0.0322934	0.93197	0.974	0.9866	0.926
10708451	---	XR_005561	---	---	---	---	---	---	2.79325	0.0414703	2.78618	0.0695985	2.77676	3.14018e-16	0.995113		0.988634		0.993489		0.194916	0	0.97973	0.9944	0.9777	0.9944
10708455	Olr20	NM_001000118	D3ZX88	D3ZX88_RAT	D3ZX88_RAT Protein LOC100911035 OS=Rattus norvegicus (Rat) GN=Olr20 PE=4 SV=1	Olr20	293083	Protein LOC100911035	3.1619	0.0331429	3.18391	3.14018e-16	3.33008	0.0923243	1.01537	1.01537	1.12364	1.12364	1.10663	1.10663	0.00403171	0	0.1535	0.9767	0.1763	0.2288
10708457	---	GENSCAN00000036969	---	---	---	---	---	---	3.96282	0.0447075	3.87339	0.0280901	3.865	0.0682994	0.939888		0.934441		0.994204		0.927824	0.573694	0.363557	0.4487	0.4037	0.995
10708460	---	ENSRNOT00000018361	---	---	---	---	---	---	3.78809	0.0460349	3.67916	0.0844232	3.55266	0.0781527	0.927276		0.84943		0.916048		0.802931	0.724072	0.13582	0.5536	0.1191	0.4509
10708462	Olr23	NM_001000119	M0R8K6	M0R8K6_RAT	M0R8K6_RAT Protein Olr23 OS=Rattus norvegicus (Rat) GN=Olr23 PE=4 SV=2	Olr23	293085	Protein Olr23	2.84105	0.031755	2.90136	0.0222017	2.8078	0.0379064	1.04269	1.04269	0.977215	0.977215	0.937207	0.937207	0.404543	0.851605	0.161944	0.3795	0.7394	0.1492
10708464	Olr25	NM_001000692	D3Z966	D3Z966_RAT	D3Z966_RAT Protein Olr25 OS=Rattus norvegicus (Rat) GN=Olr25 PE=4 SV=1	Olr25	404897	Protein Olr25	3.15093	0.0789023	3.03628	0.0247101	3.11943	0.047402	0.923608	0.923608	0.978402	0.978402	1.05933	1.05933	0.00846184	0.35633	0.388432	0.3763	0.906	0.5901
10708466	---	ENSRNOT00000044498	---	---	---	---	---	---	3.36073	0.064219	3.34811	0.0759742	3.41059	0.0236011	0.991293		1.03516		1.04426		0.445194	0.384713	0.734459	0.9858	0.8234	0.7365
10708469	Olr30	NM_001000120	D3ZRY4	D3ZRY4_RAT	D3ZRY4_RAT Protein Olr30 OS=Rattus norvegicus (Rat) GN=Olr30 PE=4 SV=1	Olr30	293091	Protein Olr30	3.17761	0.128845	3.13903	0.0871339	3.03652	0.0190487	0.973613	0.973613	0.906837	0.906837	0.931414	0.931414	0.017316	0.118844	0.557641	0.956	0.5511	0.7121
10708471	Olr34	NM_001000689	D4A3H7	D4A3H7_RAT	D4A3H7_RAT Protein Olr34 OS=Rattus norvegicus (Rat) GN=Olr34 PE=4 SV=1	Olr34	404894	Protein Olr34	4.17498	0.0502263	4.32732	0.0520723	4.30025	0.0761291	1.11137	1.11137	1.09071	1.09071	0.98141	0.98141	0.269238	0.838072	0.239251	0.2459	0.3754	0.9342
10708473	---	ENSRNOT00000029935	---	---	---	---	---	---	4.21481	0.0228715	4.34303	0.0794126	4.2957	0.0718422	1.09294		1.05767		0.967725		0.188007	0.356614	0.407665	0.3837	0.6701	0.8496
10708476	Vom2r81	ENSRNOT00000047771	D3ZEQ5	D3ZEQ5_RAT	D3ZEQ5_RAT Protein Vom2r81 OS=Rattus norvegicus (Rat) GN=Vom2r81 PE=4 SV=2	Vom2r81	682236	Protein Vom2r81	2.76732	0.0267751	2.73992	0.0245894	2.76947	0.0131287	0.981191	0.981191	1.00149	1.00149	1.02069	1.02069	0.999998	0.591649	0.551368	0.6069	1	0.6069
10708482	---	ENSRNOT00000050425	---	---	---	---	---	---	2.65663	0.0307553	2.72343	0.0630953	2.7352	0.0299833	1.04739		1.05597		1.00819		0.473282	0.504386	0.423078	0.5663	0.4292	0.9618
10708485	Nox4	NM_053524	Q924V1	NOX4_RAT	NOX4_RAT NADPH oxidase 4 OS=Rattus norvegicus (Rat) GN=Nox4 PE=1 SV=2	Nox4	85431	NADPH oxidase 4	5.54853	0.172846	6.34918	0.0588149	6.67427	0.249888	1.7419	1.7419	2.18214	2.18214	1.25274	1.25274	0.910082	0.266544	0.0109473	0.0441	0.0102	0.4542				Response to oxidative stress
10708508	Grm5	NM_017012	P31424	GRM5_RAT	GRM5_RAT Metabotropic glutamate receptor 5 OS=Rattus norvegicus (Rat) GN=Grm5 PE=1 SV=2	Grm5	24418	Metabotropic glutamate receptor 5	3.78129	0.00593233	3.74271	0.0365687	3.76967	0.0659128	0.973609	0.973609	0.991974	0.991974	1.01886	1.01886	0.048982	0.0223187	0.808687	0.7985	0.9745	0.9029
10708521	Ctsc	NM_017097	P80067	CATC_RAT	CATC_RAT Dipeptidyl peptidase 1 OS=Rattus norvegicus (Rat) GN=Ctsc PE=1 SV=3	Ctsc	25423	Dipeptidyl peptidase 1	9.55868	0.020464	9.88904	0.0950524	9.08883	0.0442316	1.25733	1.25733	0.722041	0.722041	0.574266	0.574266	0.426918	0.187705	0.000317657	0.0237	0.0044	0.0003	Autophagy/mitophagy
10708531	Rab38	NM_145774	Q63483	Q63483_RAT	Q63483_RAT Protein Rab38 OS=Rattus norvegicus (Rat) GN=Rab38 PE=1 SV=1	Rab38	252916	Protein Rab38	5.40538	0.0429692	5.33938	0.0630053	5.37862	0.00206533	0.955283	0.955283	0.981622	0.981622	1.02757	1.02757	0.393606	0	0.621779	0.6017	0.9283	0.8079
10708535	Fzd4	NM_022623	Q9QZH0	FZD4_RAT	FZD4_RAT Frizzled-4 OS=Rattus norvegicus (Rat) GN=Fzd4 PE=2 SV=1	Fzd4	64558	Frizzled-4	9.16317	0.0552758	9.49572	0.19124	8.86121	0.155993	1.25924	1.25924	0.811147	0.811147	0.644157	0.644157	0.720011	0.347696	0.0596498	0.3125	0.3773	0.0507
10708538	---	XR_007921	---	---	---	---	---	---	3.20188	0.0424398	3.2477	0.0188427	3.39139	0.083437	1.03227		1.14037		1.10472		0.0977587	0.23514	0.11113	0.8254	0.1099	0.2351
10708541	---	ENSRNOT00000023232	---	---	---	---	---	---	7.34262	0.345974	6.82505	0.060522	6.75885	0.0553937	0.69855		0.667218		0.955147		0.00480339	0.0370872	0.173168	0.2586	0.1943	0.9716
10708544	Me3	NM_001108491	F1M5N4	F1M5N4_RAT	F1M5N4_RAT Malic enzyme OS=Rattus norvegicus (Rat) GN=Me3 PE=3 SV=2	Me3	361602	Malic enzyme	8.80733	0.0573386	8.67127	0.0962066	8.53722	0.0358041	0.910006	0.910006	0.82926	0.82926	0.911268	0.911268	0.52857	0.453763	0.0777551	0.375	0.0665	0.4056
10708560	LOC102549852	ENSRNOT00000035257	D4ADM5	D4ADM5_RAT	D4ADM5_RAT Protein LOC102549852 OS=Rattus norvegicus (Rat) GN=LOC102549852 PE=4 SV=1	LOC102549852	102549852	Protein LOC102549852	6.11824	0.168542	6.46981	0.12089	7.51728	0.0445912	1.27595	1.27595	2.63727	2.63727	2.0669	2.0669	0.137859	0.328296	0.000493381	0.1896	0.0005	0.0023
10708563	---	ENSRNOT00000055481	---	---	---	---	---	---	4.97076	0.10647	5.0379	0.0818047	4.80792	0.0897515	1.04764		0.893269		0.852648		0.235575	0.945428	0.270217	0.8693	0.47	0.2602
10708565	Picalm	NM_053554	O55012	PICAL_RAT	PICAL_RAT Phosphatidylinositol-binding clathrin assembly protein OS=Rattus norvegicus (Rat) GN=Picalm PE=1 SV=1	Picalm	89816	Phosphatidylinositol-binding clathrin assembly protein	10.5741	0.0632753	10.766	0.0942008	10.6608	0.0924905	1.14223	1.14223	1.06195	1.06195	0.929715	0.929715	0.9388	0.876287	0.327763	0.3008	0.7527	0.6569
10708587	---	ENSRNOT00000055465	---	---	---	---	---	---	7.61927	0.0317392	8.09513	0.0409325	7.72774	0.156313	1.39074		1.07809		0.775186		0.147201	0.0971375	0.0270304	0.0273	0.703	0.0746
10708591	Sytl2	NM_001108492	B5DFB1	B5DFB1_RAT	B5DFB1_RAT Protein Sytl2 OS=Rattus norvegicus (Rat) GN=Sytl2 PE=2 SV=1	Sytl2	361604	Protein Sytl2	5.72996	0.0670347	5.61368	0.180447	5.33455	0.143076	0.92256	0.92256	0.760272	0.760272	0.824089	0.824089	0.110108	0.487827	0.198778	0.82	0.1888	0.3955
10708614	Ccdc89	BC167063	B2RZ86	CCD89_RAT	CCD89_RAT Coiled-coil domain-containing protein 89 OS=Rattus norvegicus (Rat) GN=Ccdc89 PE=2 SV=2	Ccdc89	293107	Coiled-coil domain-containing protein 89	5.42199	0.0470893	5.35728	0.0959432	5.21291	0.0779135	0.956138	0.956138	0.865085	0.865085	0.90477	0.90477	0.80796	0.692055	0.216248	0.8316	0.2059	0.4165
10708616	---	NM_001106279	---	---	---	---	---	---	8.18067	0.119604	8.67023	0.170785	9.09586	0.144909	1.40402		1.88582		1.34316		0.708569	0.88742	0.0129061	0.1215	0.0106	0.1793
10708618	Dlg2	NM_022282	Q63622	DLG2_RAT	DLG2_RAT Disks large homolog 2 OS=Rattus norvegicus (Rat) GN=Dlg2 PE=1 SV=1	Dlg2	64053	Disks large homolog 2	3.63986	0.0344191	3.69225	3.14018e-16	3.85821	0.134153	1.03698	1.03698	1.1634	1.1634	1.12191	1.12191	0.00312997	0	0.211612	0.8881	0.2098	0.3703
10708649	---	ENSRNOT00000051623	---	---	---	---	---	---	6.85936	0.0845485	7.06911	0.0926195	7.07455	0.0665248	1.15649		1.16086		1.00378		0.402973	0.923688	0.190707	0.2549	0.2291	0.9959
10708651	---	XR_005752	---	---	---	---	---	---	6.62933	0.111838	6.61173	0.0770344	6.89545	0.0220673	0.987874		1.20257		1.21733		0.264633	0.223912	0.0777816	0.9829	0.1213	0.0968
10708654	Ccdc90b	NM_001024885	Q4V897	CC90B_RAT	CC90B_RAT Coiled-coil domain-containing protein 90B, mitochondrial OS=Rattus norvegicus (Rat) GN=Ccdc90b PE=2 SV=1	Ccdc90b	308820	Coiled-coil domain-containing protein 90B, mitochondrial	7.8132	0.0275198	7.84599	0.0532434	7.76457	0.0729226	1.02299	1.02299	0.966853	0.966853	0.945127	0.945127	0.72615	0.507251	0.574397	0.9011	0.7951	0.5503
10708665	Rab30	NM_001015012	Q5BK72	Q5BK72_RAT	Q5BK72_RAT Protein Rab30 OS=Rattus norvegicus (Rat) GN=Rab30 PE=1 SV=1	Rab30	308821	Protein Rab30	6.5274	0.0744898	6.3424	0.264968	6.83493	0.0844158	0.879653	0.879653	1.23759	1.23759	1.40691	1.40691	0.099495	0.191205	0.187046	0.7285	0.437	0.1708
10708672	Prcp	NM_001106281	D4AA31	D4AA31_RAT	D4AA31_RAT Protein Prcp OS=Rattus norvegicus (Rat) GN=Prcp PE=1 SV=1	Prcp	293118	Protein Prcp	6.62943	0.112043	6.88089	0.0820735	6.68417	0.0680157	1.19041	1.19041	1.03867	1.03867	0.872529	0.872529	0.730121	0.79061	0.189148	0.1905	0.8964	0.3311
10708682	---	ENSRNOT00000037136	---	---	---	---	---	---	3.53954	0.0402103	3.48005	0.0192793	3.46281	0.0365267	0.959604		0.9482		0.988116		0.022713	0.677221	0.304653	0.4597	0.3071	0.9344
10708687	Fam181b	BC158703	B0BN67	B0BN67_RAT	B0BN67_RAT Protein Fam181b OS=Rattus norvegicus (Rat) GN=Fam181b PE=2 SV=1	Fam181b	499205	Protein Fam181b	5.89696	0.0138263	5.87191	0.0936252	5.88314	0	0.982786	0.982786	0.990462	0.990462	1.00781	1.00781	0.00712255	0	0.956966	0.953	0.9843	0.9911
10708689	---	XR_008102	---	---	---	---	---	---	6.04439	0.043935	5.99763	0.067236	6.00498	0.0171415	0.96811		0.973054		1.00511		0.252995	0.313234	0.769067	0.7704	0.8489	0.9876
10708691	---	ENSRNOT00000053279	---	---	---	---	---	---	10.3397	0.0570074	10.1482	0.147565	9.35076	0.238913	0.875679		0.503835		0.575365		0.144043	0.26033	0.0122123	0.7043	0.0131	0.0334
10708693	---	ENSRNOT00000037615	---	---	---	---	---	---	7.17088	0.100892	6.93016	0.0672917	6.78502	0.019454	0.84632		0.765321		0.904293		0.249263	0.203127	0.0245752	0.1204	0.0213	0.3916
10708695	Tenm4	ENSRNOT00000015181	F1LZ38	F1LZ38_RAT	F1LZ38_RAT Protein Tenm4 OS=Rattus norvegicus (Rat) GN=Tenm4 PE=4 SV=2	Tenm4	308831	Protein Tenm4	5.47516	0.0699935	5.14475	0.0223107	4.94344	0.0466954	0.795306	0.795306	0.691725	0.691725	0.86976	0.86976	0.666943	0.420634	0.00083225	0.0081	0.0007	0.0654
10708727	Nars2	NM_001034921	Q3SWT9	Q3SWT9_RAT	Q3SWT9_RAT Asparaginyl-tRNA synthetase 2 (Mitochondrial)(Putative) OS=Rattus norvegicus (Rat) GN=Nars2 PE=2 SV=1	Nars2	293128	Asparaginyl-tRNA synthetase 2 (Mitochondrial)(Putative)	7.92805	0.0605254	7.65985	0.123306	7.28475	0.125755	0.830354	0.830354	0.640247	0.640247	0.771053	0.771053	0.633528	0.637242	0.0147188	0.2488	0.0123	0.1042
10708743	---	ENSRNOT00000053862	---	---	---	---	---	---	2.55714	0.0535074	2.54016	0.0141904	2.51447	0.0174339	0.988298		0.970856		0.982352		0.718559	0.190454	0.711191	0.9346	0.6908	0.8771
10708745	Gab2	NM_053417	Q9EQH1	GAB2_RAT	GAB2_RAT GRB2-associated-binding protein 2 OS=Rattus norvegicus (Rat) GN=Gab2 PE=1 SV=2	Gab2	84477	GRB2-associated-binding protein 2	6.96565	0.0520012	7.56839	0.0132853	8.62268	0.0622048	1.51861	1.51861	3.15368	3.15368	2.07669	2.07669	0.0887001	0.226075	8.77353e-07	0.0003	0	0
10708756	Kctd21	NM_001109151	D4ADH5	D4ADH5_RAT	D4ADH5_RAT Protein Kctd21 OS=Rattus norvegicus (Rat) GN=Kctd21 PE=4 SV=2	Kctd21	499209	Protein Kctd21	5.95459	0.0119478	5.99916	0.0308367	5.98253	0.007303	1.03138	1.00359	1.01955	0.972816	0.988535	0.968793	0.165711	0.200983	0.304761	0.2948	0.5037	0.8859
10708760	Alg8	NM_001034127	Q497D1	Q497D1_RAT	Q497D1_RAT Asparagine-linked glycosylation 8, alpha-1,3-glucosyltransferase homolog (S. cerevisiae) OS=Rattus norvegicus (Rat) GN=Alg8 PE=2 SV=1	Alg8	293129	Asparagine-linked glycosylation 8, alpha-1,3-glucosyltransferase homolog (S. cerevisiae)	5.62494	0.0468285	5.64841	0.105167	5.81189	0.145027	1.0164	1.0164	1.13836	1.13836	1.11999	1.11999	0.17783	0.41815	0.447832	0.9868	0.4722	0.5538
10708775	Ndufc2	NM_001009290	Q5PQZ9	Q5PQZ9_RAT	Q5PQZ9_RAT NADH dehydrogenase [ubiquinone] 1 subunit C2 OS=Rattus norvegicus (Rat) GN=Ndufc2 PE=1 SV=1	Ndufc2	293130	NADH dehydrogenase [ubiquinone] 1 subunit C2	11.9053	0.0425859	11.3332	0.0309375	9.73956	0.0540194	0.672651	0.672651	0.222869	0.222869	0.331329	0.331329	0.0279268	0.815718	9.07363e-08	0.0002	0	0			Oxidative phosphorylation
10708779	---	XR_008143	---	---	---	---	---	---	6.60332	0.0456572	6.62753	0.0406013	6.55473	0.0275887	1.01693		0.96688		0.950785		0.159432	0.824327	0.424954	0.8821	0.6577	0.4049
10708782	Kctd14	ENSRNOT00000016654	F1M0C4	F1M0C4_RAT	F1M0C4_RAT Protein Kctd14 OS=Rattus norvegicus (Rat) GN=Kctd14 PE=4 SV=2	Kctd14	308836	Protein Kctd14	6.16305	0.0987274	6.38263	0.0145474	6.43412	0.0295047	1.1644	1.1644	1.2067	1.2067	1.03633	1.03633	0.0214084	0.0733989	0.039711	0.0923	0.0419	0.8073
10708785	Ints4	ENSRNOT00000016770	D3ZZQ6	D3ZZQ6_RAT	D3ZZQ6_RAT Protein Ints4 OS=Rattus norvegicus (Rat) GN=Ints4 PE=1 SV=1	Ints4	308837	Protein Ints4	8.15379	0.0338845	8.08993	0.149448	8.3446	0.0382897	0.9567	0.9567	1.1414	1.1414	1.19306	1.19306	0.126145	0.106357	0.208835	0.8671	0.3803	0.2039
10708809	Rsf1	ENSRNOT00000037050	D3ZGQ8	D3ZGQ8_RAT	D3ZGQ8_RAT Protein Rsf1 OS=Rattus norvegicus (Rat) GN=Rsf1 PE=1 SV=2	Rsf1	308839	Protein Rsf1	8.93311	0.0455069	9.15252	0.115431	8.94538	0.0477179	1.16425	1.16425	1.00854	1.00854	0.866257	0.866257	0.045976	0.384929	0.160977	0.1927	0.9917	0.225
10708824	Clns1a	NM_031719	Q04753	ICLN_RAT	ICLN_RAT Methylosome subunit pICln OS=Rattus norvegicus (Rat) GN=Clns1a PE=1 SV=1	Clns1a	65160	Methylosome subunit pICln	8.24755	0.0334856	8.35633	0.162325	8.20849	0.0687556	1.07832	1.07832	0.973289	0.973289	0.902601	0.902601	0.0184302	0.163963	0.60652	0.7438	0.9662	0.6022
10708832	---	ENSRNOT00000043552	---	---	---	---	---	---	8.47076	0.0373445	8.60491	0.111599	8.51152	0.00615743	1.09744		1.02865		0.937321		0.00033916	0.0142523	0.39977	0.3878	0.91	0.5993
10708834	Pak1	NM_017198	P35465	PAK1_RAT	PAK1_RAT Serine/threonine-protein kinase PAK 1 OS=Rattus norvegicus (Rat) GN=Pak1 PE=1 SV=3	Pak1	29431	Serine/threonine-protein kinase PAK 1	6.29656	0.0925863	6.27428	0.129023	6.8971	0.072626	0.984681	0.984681	1.51629	1.51629	1.53988	1.53988	0.50858	0.775529	0.00751272	0.9891	0.0131	0.0112
10708852	---	ENSRNOT00000038399	---	---	---	---	---	---	3.71363	0.0233897	3.71096	0	3.74027	0.0149297	0.998149		1.01864		1.02053		0.0562862	0	0.458599	0.99	0.5581	0.4865
10708854	Gdpd4	ENSRNOT00000034886	F1M812	F1M812_RAT	F1M812_RAT Protein Gdpd4 OS=Rattus norvegicus (Rat) GN=Gdpd4 PE=4 SV=3	Gdpd4	680990	Protein Gdpd4	3.9001	0.0171849	3.92422	0.0826101	3.84951	0.0149271	1.01686	1.01686	0.96554	0.96554	0.949529	0.949529	0.0114747	0.0572812	0.60183	0.9431	0.7713	0.587
10708874	Gucy2d	NM_130737	P51839	GUC2D_RAT	GUC2D_RAT Olfactory guanylyl cyclase GC-D OS=Rattus norvegicus (Rat) GN=Gucy2d PE=2 SV=1	Gucy2d	113911	Olfactory guanylyl cyclase GC-D	5.10494	0.0270891	5.14356	0.0421997	5.06267	0.0351816	1.02714	1.02714	0.971126	0.971126	0.94547	0.94547	0.159158	0.815045	0.356538	0.7255	0.7255	0.3278
10708896	Lrrc32	ENSRNOT00000020520	D3ZVD5	D3ZVD5_RAT	D3ZVD5_RAT Protein Lrrc32 OS=Rattus norvegicus (Rat) GN=Lrrc32 PE=4 SV=1	Lrrc32	293135	Protein Lrrc32	6.66829	0.050074	6.91935	0.0648427	7.10763	0.120964	1.19008	1.19008	1.35599	1.35599	1.13941	1.13941	0.750178	0.50885	0.0310196	0.1745	0.0263	0.3452
10708901	---	ENSRNOT00000052805	---	---	---	---	---	---	3.8234	0.0153623	3.77403	0.034007	3.82144	0.0454002	0.966359		0.998643		1.03341		0.23167	0.35167	0.565312	0.6199	1	0.6199
10708903	---	ENSRNOT00000021228	---	---	---	---	---	---	9.3813	0.00166745	8.98518	0.137695	8.84241	0.127235	0.759896		0.688299		0.905781		0.257695	0	0.0315271	0.0956	0.0304	0.6431
10708908	---	ENSRNOT00000055332	---	---	---	---	---	---	6.63212	0.0648226	6.33672	0.107749	5.96671	0.0412598	0.81485		0.630513		0.773778		0.383898	0.503779	0.00260429	0.0772	0.0021	0.0334
10708921	Map6	NM_017204	Q63560	MAP6_RAT	MAP6_RAT Microtubule-associated protein 6 OS=Rattus norvegicus (Rat) GN=Map6 PE=1 SV=1	Map6	29457	Microtubule-associated protein 6	6.61017	0.063383	6.45577	0.0577236	6.46062	0.0376513	0.89851	0.89851	0.901532	0.901532	1.00336	1.00336	0.275891	0.754149	0.156018	0.1965	0.2074	0.999
10708929	Gdpd5	NM_001109152	G3V9L7	G3V9L7_RAT	G3V9L7_RAT Protein Gdpd5 OS=Rattus norvegicus (Rat) GN=Gdpd5 PE=4 SV=2	Gdpd5	499211	Protein Gdpd5	6.99522	0.0988694	6.40963	0.045015	6.08853	0.066513	0.666374	0.666374	0.533404	0.533404	0.800457	0.800457	0.374385	0.609542	0.000323095	0.0029	0.0003	0.0465
10708947	Klhl35	ENSRNOT00000023386	D4A6V5	D4A6V5_RAT	D4A6V5_RAT Protein Klhl35 OS=Rattus norvegicus (Rat) GN=Klhl35 PE=4 SV=1	Klhl35	308850	Protein Klhl35	5.62388	0.0276661	5.43331	0.041429	5.38395	0.0907927	0.876259	0.876259	0.846784	0.846784	0.966362	0.966362	0.425062	0.323812	0.059173	0.1308	0.0614	0.8272
10708954	Arrb1	NM_012910	P29066	ARRB1_RAT	ARRB1_RAT Beta-arrestin-1 OS=Rattus norvegicus (Rat) GN=Arrb1 PE=1 SV=1	Arrb1	25387	Beta-arrestin-1	6.75502	0.0594661	6.60767	0.0117033	6.43714	0.0794391	0.902907	0.902907	0.80225	0.80225	0.888519	0.888519	0.534841	0.0851975	0.0209889	0.2368	0.0174	0.1639
10708970	---	rno-mir-326	---	---	---	---	---	---	6.05243	0.0774528	5.9285	0.037913	5.93767	0.0995019	0.917687		0.923538		1.00638		0.973667	0.555236	0.479369	0.5228	0.5561	0.9979
10708972	---	ENSRNOT00000055312	---	---	---	---	---	---	6.28563	0.042986	6.28123	0.0289943	6.31022	0	0.996954		1.01719		1.0203		0.00128153	0	0.751875	0.9966	0.8112	0.7692
10708974	Olr35	NM_001000121	Q5RJS1	Q5RJS1_RAT	Q5RJS1_RAT Olfactory receptor OS=Rattus norvegicus (Rat) GN=Olr35 PE=2 SV=1	Olr35	293140	Olfactory receptor	3.70297	0.072395	3.86005	0.0257662	3.86218	0.0212213	1.11503	1.11503	1.11667	1.11667	1.00148	1.00148	0.0128889	0.214304	0.0781677	0.1082	0.1082	1
10708980	Olr36	NM_001000935	M0RC72	M0RC72_RAT	M0RC72_RAT Olfactory receptor OS=Rattus norvegicus (Rat) GN=Olr36 PE=3 SV=2	Olr36	405257	Olfactory receptor	4.31609	0.0919102	4.13898	0.0307293	4.18252	0.0318015	0.884472	0.884472	0.911573	0.911573	1.03064	1.03064	0.0323811	0.247378	0.16971	0.1706	0.3076	0.8854
10708982	Olr37	NM_001000504	Q9Z236	Q9Z236_RAT	Q9Z236_RAT Olfactory receptor OS=Rattus norvegicus (Rat) GN=Olr37 PE=2 SV=1	Olr37	308853	Olfactory receptor	4.18158	0.0211202	4.22377	0	4.22978	0.006013	1.02967	1.02967	1.03397	1.03397	1.00418	1.00418	0.000887339	0	0.0694057	0.1278	0.0781	0.9217
10708984	---	ENSRNOT00000024338	---	---	---	---	---	---	7.06013	0.0748087	7.02828	0.102043	6.98004	0.0690878	0.97817		0.946003		0.967115		0.769405	0.844807	0.798049	0.9569	0.7824	0.9178
10708986	Xrra1	NM_001113753	B0BNC6	B0BNC6_RAT	B0BNC6_RAT Protein Xrra1 OS=Rattus norvegicus (Rat) GN=Xrra1 PE=2 SV=1	Xrra1	365313	Protein Xrra1	4.07188	0.0230064	4.04831	0.0248453	4.09952	0.0261357	0.983793	0.983793	1.01934	1.01934	1.03613	1.03613	0.25659	0.978574	0.406536	0.7855	0.7323	0.3775
10709003	---	ENSRNOT00000054010	---	---	---	---	---	---	3.19649	0.0338975	3.363	0.138509	3.27575	0.0392135	1.12234		1.05647		0.941315		0.410246	0.137461	0.430689	0.4012	0.789	0.7586
10709005	Chrdl2	NM_001107537	F1LW58	F1LW58_RAT	F1LW58_RAT Protein Chrdl2 OS=Rattus norvegicus (Rat) GN=Chrdl2 PE=4 SV=2	Chrdl2	308854	Protein Chrdl2	6.81443	0.0164675	6.733	0.117124	5.6818	0.132841	0.945121	0.945121	0.456084	0.456084	0.482567	0.482567	0.046542	0.0953871	0.000416791	0.8518	0.0006	0.0009
10709013	Lipt2	NM_001108917	D3Z9Z2	D3Z9Z2_RAT	D3Z9Z2_RAT Putative lipoyltransferase 2, mitochondrial OS=Rattus norvegicus (Rat) GN=Lipt2 PE=3 SV=1	Lipt2	365314	Putative lipoyltransferase 2, mitochondrial	6.73034	0.012772	6.749	0.0820778	6.6917	0.0147551	1.01302	1.01302	0.973571	0.973571	0.961062	0.961062	0.10479	0.0397486	0.710294	0.968	0.8331	0.7008
10709016	Kcne3	NM_022235	Q9JJV7	KCNE3_RAT	KCNE3_RAT Potassium voltage-gated channel subfamily E member 3 OS=Rattus norvegicus (Rat) GN=Kcne3 PE=1 SV=1	Kcne3	63883	Potassium voltage-gated channel subfamily E member 3	4.30723	0.044719	4.40477	0.052814	4.38214	0.0293256	1.06994	1.06994	1.05329	1.05329	0.984439	0.984439	0.355432	0.773282	0.326279	0.324	0.4965	0.924
10709020	Pgm2l1	NM_001109454	D3Z955	D3Z955_RAT	D3Z955_RAT Protein Pgm2l1 OS=Rattus norvegicus (Rat) GN=Pgm2l1 PE=1 SV=1	Pgm2l1	685076	Protein Pgm2l1	9.06915	0.0773398	9.33394	0.0692449	9.72424	0.0649577	1.20146	1.20146	1.57472	1.57472	1.31067	1.31067	0.617934	0.977997	0.00162658	0.0819	0.0013	0.0169
10709034	P4ha3	NM_198775	Q6W3E9	P4HA3_RAT	P4HA3_RAT Prolyl 4-hydroxylase subunit alpha-3 OS=Rattus norvegicus (Rat) GN=P4ha3 PE=2 SV=1	P4ha3	361612	Prolyl 4-hydroxylase subunit alpha-3	4.69543	0.0578927	4.66199	0.0879389	4.47795	0.125481	0.977087	0.977087	0.860066	0.860066	0.880235	0.880235	0.106832	0.6141	0.298107	0.9672	0.3147	0.4184
10709048	C2cd3	ENSRNOT00000023802	D3ZS69	D3ZS69_RAT	D3ZS69_RAT Protein C2cd3 OS=Rattus norvegicus (Rat) GN=C2cd3 PE=1 SV=2	C2cd3	293148	Protein C2cd3	6.77301	0.125692	7.12373	0.0972896	7.34996	0.156733	1.2752	1.2752	1.4917	1.4917	1.16977	1.16977	0.81292	0.830577	0.0486399	0.2065	0.0422	0.4649
10709083	Ucp3	NM_013167	P56499	UCP3_RAT	UCP3_RAT Mitochondrial uncoupling protein 3 OS=Rattus norvegicus (Rat) GN=Ucp3 PE=2 SV=1	Ucp3	25708	Mitochondrial uncoupling protein 3	9.59204	0.413635	11.8348	0.10947	8.62161	0.370858	4.73294	4.73294	0.510354	0.510354	0.10783	0.10783	0.280228	0.306504	0.00119145	0.0069	0.1715	0.0011
10709093	Ucp2	NM_019354	P56500	UCP2_RAT	UCP2_RAT Mitochondrial uncoupling protein 2 OS=Rattus norvegicus (Rat) GN=Ucp2 PE=2 SV=1	Ucp2	54315	Mitochondrial uncoupling protein 2	7.5332	0.114054	7.90121	0.404132	6.74854	0.128437	1.29057	1.29057	0.580486	0.580486	0.449789	0.449789	0.669644	0.189923	0.0452925	0.5808	0.1528	0.0413
10709111	Coa4	NM_001127655	B0K013	B0K013_RAT	B0K013_RAT Chchd8 protein OS=Rattus norvegicus (Rat) GN=Coa4 PE=2 SV=1	Coa4	499214	Chchd8 protein	6.54833	0.0842136	6.39948	0.05847	6.48481	0.0460111	0.901966	0.901966	0.956925	0.956925	1.06093	1.06093	0.108059	0.747238	0.338626	0.3128	0.7836	0.6433
10709116	---	ENSRNOT00000048204	---	---	---	---	---	---	9.75427	0.0294618	9.81932	0.102136	9.77584	0.0722355	1.04613		1.01506		0.970307		0.79551	0.32879	0.838322	0.8274	0.9739	0.9258
10709126	Fam168a	NM_001108494	D3ZHW1	D3ZHW1_RAT	D3ZHW1_RAT LOC361614 (Predicted), isoform CRA_a OS=Rattus norvegicus (Rat) GN=Fam168a PE=1 SV=1	Fam168a	361614	LOC361614 (Predicted), isoform CRA_a	6.51208	0.0959213	6.94448	0.0631528	6.4563	0.0651067	1.34948	1.34948	0.96207	0.96207	0.712921	0.712921	0.536242	0.817789	0.00703826	0.0155	0.8591	0.0088
10709135	Fchsd2	NM_001107539	D3ZCY3	D3ZCY3_RAT	D3ZCY3_RAT FCH and double SH3 domains 2 (Predicted), isoform CRA_b OS=Rattus norvegicus (Rat) GN=Fchsd2 PE=1 SV=2	Fchsd2	308864	FCH and double SH3 domains 2 (Predicted), isoform CRA_b	6.72794	0.107317	6.70126	0.169433	6.41652	0.131724	0.98168	0.98168	0.80585	0.80585	0.820888	0.820888	0.841417	0.835043	0.289855	0.9899	0.3236	0.3792
10709157	Stard10	NM_001013069	Q5BJN1	Q5BJN1_RAT	Q5BJN1_RAT Protein Stard10 OS=Rattus norvegicus (Rat) GN=Stard10 PE=1 SV=1	Stard10	293150	Protein Stard10	8.59594	0.0471676	8.47409	0.16091	7.57963	0.0924006	0.919003	0.919003	0.494377	0.494377	0.537949	0.537949	0.130526	0.350844	0.00116426	0.7201	0.0015	0.0029
10709166	Arap1	ENSRNOT00000030037	F1LM60	F1LM60_RAT	F1LM60_RAT Protein Arap1 OS=Rattus norvegicus (Rat) GN=Arap1 PE=1 SV=1	Arap1	361617	Protein Arap1	6.93332	0.0614335	6.88076	0.0346287	7.10175	0.0563009	0.964228	0.964228	1.12384	1.12384	1.16553	1.16553	0.674206	0.775047	0.0530577	0.7603	0.1316	0.0529
10709200	Pde2a	NM_031079	Q01062	PDE2A_RAT	PDE2A_RAT cGMP-dependent 3',5'-cyclic phosphodiesterase OS=Rattus norvegicus (Rat) GN=Pde2a PE=1 SV=2	Pde2a	81743	cGMP-dependent 3',5'-cyclic phosphodiesterase	7.23322	0.0482009	7.59812	0.170875	7.88389	0.144967	1.2878	1.2878	1.56989	1.56989	1.21905	1.21905	0.278328	0.347017	0.0366783	0.209	0.031	0.344
10709235	---	rno-mir-139	---	---	---	---	---	---	7.51523	0.0208469	7.54495	0.00124667	7.72047	0.0521242	1.02081		1.15288		1.12937		0.0191005	0.027467	0.00743776	0.7833	0.0087	0.0182
10709237	Clpb	NM_022947	Q9WTT2	CLPB_RAT	CLPB_RAT Caseinolytic peptidase B protein homolog OS=Rattus norvegicus (Rat) GN=Clpb PE=2 SV=1	Clpb	65041	Caseinolytic peptidase B protein homolog	9.30635	0.0329561	9.34542	0.0178306	9.33822	0.0709043	1.02745	1.02745	1.02234	1.02234	0.995024	0.995024	0.717121	0.230687	0.799358	0.8178	0.8438	0.9986
10709255	Phox2a	NM_053869	Q62782	PHX2A_RAT	PHX2A_RAT Paired mesoderm homeobox protein 2A OS=Rattus norvegicus (Rat) GN=Phox2a PE=2 SV=1	Phox2a	116648	Paired mesoderm homeobox protein 2A	5.47	0.00792303	5.52528	0.112785	5.31265	0.0743033	1.03906	1.03906	0.896669	0.896669	0.86296	0.86296	0.183804	0.0235629	0.219841	0.8698	0.3953	0.2144
10709261	---	ENSRNOT00000055252	---	---	---	---	---	---	7.80654	0.0452015	7.22893	0.219132	7.23172	0.122803	0.670072		0.671372		1.00194		0.582937	0.215099	0.0513289	0.0721	0.0751	0.9994
10709268	Lamtor1	BC061783	Q6P791	LTOR1_RAT	LTOR1_RAT Ragulator complex protein LAMTOR1 OS=Rattus norvegicus (Rat) GN=Lamtor1 PE=1 SV=1	Lamtor1	308869	Ragulator complex protein LAMTOR1	8.4781	0.0307483	8.32536	0.21946	8.44204	0.0470296	0.899538	0.896698	0.975309	0.989327	1.08423	1.10336	0.577267	0.0367012	0.688999	0.6876	0.9784	0.7981
10709274	Numa1	ENSRNOT00000000474	F1LW91	F1LW91_RAT	F1LW91_RAT Protein Numa1 OS=Rattus norvegicus (Rat) GN=Numa1 PE=1 SV=2	Numa1	308870	Protein Numa1	8.26023	0.028209	8.98586	0.034291	9.24784	0.0352297	1.65362	1.65362	1.98289	1.98289	1.19913	1.19913	0.0409723	0.963121	1.64217e-06	0	0	0.0028
10709300	Trpc2	AF136401	Q9R283	TRPC2_RAT	TRPC2_RAT Short transient receptor potential channel 2 OS=Rattus norvegicus (Rat) GN=Trpc2 PE=2 SV=2	Trpc2	64573	Short transient receptor potential channel 2	5.22002	0	5.24694	0.0430456	5.1162	0.0529125	1.01883	1.01883	0.930566	0.930566	0.913364	0.913364	0.0579462	0	0.118668	0.8813	0.2257	0.1222
10709330	Art1	NM_001107541	D3ZJK0	D3ZJK0_RAT	D3ZJK0_RAT NAD(P)(+)--arginine ADP-ribosyltransferase OS=Rattus norvegicus (Rat) GN=Art1 PE=3 SV=1	Art1	308873	NAD(P)(+)--arginine ADP-ribosyltransferase	10.0772	0.10203	10.9221	0.0927819	10.6958	0.0645088	1.79625	1.79625	1.53546	1.53546	0.854817	0.854817	0.424897	0.833703	0.00133452	0.0013	0.0063	0.2475
10709336	Pgap2	NM_053895	Q2ABP3	PGAP2_RAT	PGAP2_RAT Post-GPI attachment to proteins factor 2 OS=Rattus norvegicus (Rat) GN=Pgap2 PE=2 SV=1	Pgap2	116675	Post-GPI attachment to proteins factor 2	6.97869	0.0270047	7.06554	0.0645655	6.86226	0.0894253	1.06205	1.06205	0.922468	0.922468	0.868576	0.868576	0.0598297	0.369244	0.161215	0.6184	0.4641	0.1431
10709347	Stim1	NM_001108496	P84903	STIM1_RAT	STIM1_RAT Stromal interaction molecule 1 OS=Rattus norvegicus (Rat) GN=Stim1 PE=1 SV=1	Stim1	361618	Stromal interaction molecule 1	10.2648	0.0179374	10.126	0.0393146	9.15065	0.0311327	0.908318	0.908318	0.461975	0.461975	0.508605	0.508605	0.00386678	0.620479	4.11386e-07	0.0393	0	0
10709360	---	XR_008561	---	---	---	---	---	---	4.75505	0.043606	4.8441	0.132651	4.63378	0.0542856	1.06367		0.91938		0.86435		0.0349939	0.302045	0.302042	0.7544	0.6164	0.2768
10709362	Olr41	NM_001000126	D4A4P2	D4A4P2_RAT	D4A4P2_RAT Olfactory receptor OS=Rattus norvegicus (Rat) GN=Olr41 PE=3 SV=1	Olr41	293195	Olfactory receptor	4.24213	0.0271212	4.16959	0.061716	4.28104	0.0316086	0.950958	0.950958	1.02733	1.02733	1.08031	1.08031	0.07728	0.567377	0.257084	0.4885	0.8218	0.2416
10709364	---	ENSRNOT00000024998	---	---	---	---	---	---	6.05609	0.0679521	6.17048	0.125535	6.0561	0.0847338	1.08251		1.00001		0.923782		0.436274	0.726443	0.654599	0.7019	1	0.7019
10709366	Olr43	NM_001000541	D4ACH0	D4ACH0_RAT	D4ACH0_RAT Olfactory receptor OS=Rattus norvegicus (Rat) GN=Olr43 PE=3 SV=1	Olr43	365322	Olfactory receptor	5.0514	0.017021	4.97531	0.0634327	5.0411	0.00671367	0.948624	0.948624	0.992881	0.992881	1.04665	1.04665	0.000214506	0.0468599	0.368954	0.3812	0.9662	0.5011
10709368	Olr45	NM_001000124	D4ACI2	D4ACI2_RAT	D4ACI2_RAT Olfactory receptor OS=Rattus norvegicus (Rat) GN=Olr45 PE=3 SV=1	Olr45	293192	Olfactory receptor	4.01209	0.0115937	4.00042	0.0593407	4.03317	0.0469844	0.99194	0.99194	1.01472	1.01472	1.02296	1.02296	0.428308	0.25224	0.869963	0.9756	0.9462	0.8597
10709370	Olr46	NM_001001001	D4ACJ4	D4ACJ4_RAT	D4ACJ4_RAT Olfactory receptor OS=Rattus norvegicus (Rat) GN=Olr46 PE=3 SV=1	Olr46	405365	Olfactory receptor	3.83401	0.330965	3.99007	0.126915	4.02904	0.207055	1.11424	1.11424	1.14475	1.14475	1.02738	1.02738	0.364926	0.495746	0.827963	0.8842	0.8319	0.9934
10709372	Olr48	NM_001000122	F1M7E1	F1M7E1_RAT	F1M7E1_RAT Protein Olr48 OS=Rattus norvegicus (Rat) GN=Olr48 PE=4 SV=1	Olr48	293188	Protein Olr48	4.16787	0.118671	4.23789	0.134813	4.33075	0.106431	1.04973	1.04973	1.11952	1.11952	1.06649	1.06649	0.459993	0.948804	0.659965	0.912	0.6363	0.8601
10709374	Olr49	NM_001000132	D3ZYQ5	D3ZYQ5_RAT	D3ZYQ5_RAT Protein Olr49 OS=Rattus norvegicus (Rat) GN=Olr49 PE=4 SV=2	Olr49	293211	Protein Olr49	5.18432	0.0781651	5.29519	0.105429	5.14023	0.134328	1.07988	1.07988	0.969902	0.969902	0.898158	0.898158	0.810996	0.807014	0.607372	0.7587	0.9564	0.5978
10709377	Olr50	NM_001000131	D3ZYR2	D3ZYR2_RAT	D3ZYR2_RAT Olfactory receptor OS=Rattus norvegicus (Rat) GN=Olr50 PE=3 SV=2	Olr50	293210	Olfactory receptor	3.53638	0.0557479	3.55611	0.0553343	3.51624	0.0154653	1.01377	1.01377	0.986137	0.986137	0.972743	0.972743	0.00422716	0.333201	0.836608	0.9659	0.9347	0.8235
10709381	Olr53	NM_001001008	D3ZGN9	D3ZGN9_RAT	D3ZGN9_RAT Olfactory receptor OS=Rattus norvegicus (Rat) GN=Olr53 PE=3 SV=1	Olr53	405378	Olfactory receptor	3.77297	0.054416	3.8204	0.009537	3.88494	0.0437268	1.03343	1.03343	1.0807	1.0807	1.04575	1.04575	0.027677	0.178767	0.226916	0.6815	0.2044	0.5526
10709383	---	ENSRNOT00000025109	---	---	---	---	---	---	4.90329	0.0232163	4.88371	0.0269312	4.88999	0.0448401	0.98652		0.990825		1.00436		0.54617	0.714414	0.911072	0.9058	0.9566	0.9889
10709385	Or51e2	NM_173293	O88628	O51E2_RAT	O51E2_RAT Olfactory receptor 51E2 OS=Rattus norvegicus (Rat) GN=Or51e2 PE=2 SV=1	Or51e2	170816	Olfactory receptor 51E2	5.63578	0.0836523	5.51539	0.250267	5.38316	0.185593	0.919943	0.919943	0.83937	0.83937	0.912416	0.912416	0.69057	0.434192	0.663502	0.8936	0.6387	0.8824
10709388	Olr60	NM_001000748	D3ZTJ5	D3ZTJ5_RAT	D3ZTJ5_RAT Olfactory receptor OS=Rattus norvegicus (Rat) GN=Olr60 PE=3 SV=1	Olr60	405017	Olfactory receptor	4.92825	0.0426636	4.97684	0.0166231	4.97775	0.0155293	1.03425	1.03425	1.03491	1.03491	1.00063	1.00063	0.00279012	0.344147	0.413324	0.4743	0.4743	1
10709390	Olr61	NM_001001022	A0A0G2JW39	A0A0G2JW39_RAT	A0A0G2JW39_RAT Olfactory receptor OS=Rattus norvegicus (Rat) GN=Olr61 PE=3 SV=1	Olr61	405906	Olfactory receptor	4.8728	0.139564	4.91963	0.0415387	4.8781	0	1.033	1.033	1.00368	1.00368	0.971618	0.971618	0.176373	0	0.915801	0.9204	0.9983	0.9407
10709392	Olr62	NM_001000129	A0A0G2JT34	A0A0G2JT34_RAT	A0A0G2JT34_RAT Olfactory receptor OS=Rattus norvegicus (Rat) GN=Olr62 PE=3 SV=1	Olr62	293201	Olfactory receptor	3.8363	0.0665283	4.02884	0.0965882	3.93925	0.0364277	1.14277	1.14277	1.07397	1.07397	0.939795	0.939795	0.0683937	0.502721	0.228474	0.2049	0.5891	0.6449
10709394	Olr67	NM_001001279	F1LXE2	F1LXE2_RAT	F1LXE2_RAT Olfactory receptor OS=Rattus norvegicus (Rat) GN=Olr67 PE=3 SV=2	Olr67	365324	Olfactory receptor	4.18151	0.0438203	4.36518	0.0508464	4.37042	0.0112215	1.13577	1.13577	1.13991	1.13991	1.00364	1.00364	0.924213	0.236112	0.0262131	0.0409	0.0381	0.9981
10709396	Olr68	NM_001000133	D3ZID6	D3ZID6_RAT	D3ZID6_RAT Olfactory receptor OS=Rattus norvegicus (Rat) GN=Olr68 PE=3 SV=1	Olr68	293214	Olfactory receptor	3.57051	0.033244	3.52341	0.0835973	3.67962	0.0642063	0.967881	0.967881	1.07856	1.07856	1.11436	1.11436	0.0850696	0.533113	0.27583	0.8645	0.4819	0.2645
10709399	Olr74	NM_001000134	D4AC44	D4AC44_RAT	D4AC44_RAT Olfactory receptor OS=Rattus norvegicus (Rat) GN=Olr74 PE=3 SV=2	Olr74	293218	Olfactory receptor	3.28861	0.021903	3.28874	0.0754828	3.22134	0.0253647	1.00009	1.00009	0.954439	0.954439	0.954355	0.954355	0.237006	0.209361	0.555542	1	0.6108	0.6108
10709401	Olr75	NM_001001281	D3ZAF1	D3ZAF1_RAT	D3ZAF1_RAT Olfactory receptor OS=Rattus norvegicus (Rat) GN=Olr75 PE=3 SV=1	Olr75	365327	Olfactory receptor	3.26897	0.00645861	3.59025	0.179202	3.58774	0.126523	1.24944	1.24944	1.24727	1.24727	0.998259	0.998259	0.0651178	0.0113193	0.196	0.2416	0.2531	0.9992
10709403	Olr77	NM_001001287	D4AAM9	D4AAM9_RAT	D4AAM9_RAT Olfactory receptor OS=Rattus norvegicus (Rat) GN=Olr77 PE=3 SV=1	Olr77	405907	Olfactory receptor	3.43255	0.099953	3.51967	0.020334	3.56732	0.116064	1.06225	1.06225	1.09792	1.09792	1.03358	1.03358	0.422426	0.162688	0.571984	0.7625	0.5537	0.9274
10709405	Olr78	NM_001000135	D4ABJ3	D4ABJ3_RAT	D4ABJ3_RAT Olfactory receptor OS=Rattus norvegicus (Rat) GN=Olr78 PE=3 SV=1	Olr78	293221	Olfactory receptor	4.23147	0	4.24618	0.0696532	4.38039	0.0757189	1.01024	1.01024	1.10874	1.10874	1.0975	1.0975	0.0672149	0	0.22444	0.9864	0.2546	0.3085
10709407	Olr79	NM_001002270	D4AA80	D4AA80_RAT	D4AA80_RAT Olfactory receptor OS=Rattus norvegicus (Rat) GN=Olr79 PE=3 SV=1	Olr79	293222	Olfactory receptor	3.97766	0.0513231	3.98758	0.001981	4.13009	0.117492	1.00689	1.00689	1.11143	1.11143	1.10382	1.10382	0.00227529	0.00768966	0.324923	0.9949	0.3655	0.4078
10709409	Olr81	NM_001001271	D3ZJT5	D3ZJT5_RAT	D3ZJT5_RAT Olfactory receptor OS=Rattus norvegicus (Rat) GN=Olr81 PE=3 SV=1	Olr81	293224	Olfactory receptor	2.80102	0.0174709	2.86526	0.0209297	3.03802	0.101088	1.04553	1.04553	1.17854	1.17854	1.12722	1.12722	0.0165463	0.0524385	0.0705886	0.725	0.0675	0.183
10709411	Olr83	NM_001000136	D3ZL01	D3ZL01_RAT	D3ZL01_RAT Olfactory receptor OS=Rattus norvegicus (Rat) GN=Olr83 PE=3 SV=1	Olr83	293226	Olfactory receptor	3.50761	0.118382	3.53819	0.0355424	3.66999	0.042192	1.02142	1.02142	1.11913	1.11913	1.09566	1.09566	0.117455	0.229988	0.331037	0.9492	0.3372	0.477
10709413	Olr84	NM_001000137	D3ZVA3	D3ZVA3_RAT	D3ZVA3_RAT Protein Olr84 OS=Rattus norvegicus (Rat) GN=Olr84 PE=4 SV=1	Olr84	293227	Protein Olr84	3.28089	0.0723345	3.61142	0.0734208	3.4152	0.108428	1.25747	1.25747	1.09756	1.09756	0.872832	0.872832	0.924194	0.830739	0.0837137	0.0735	0.5463	0.2956
10709415	Olr85	NM_001000138	D4AA74	D4AA74_RAT	D4AA74_RAT Olfactory receptor OS=Rattus norvegicus (Rat) GN=Olr85 PE=3 SV=1	Olr85	293228	Olfactory receptor	4.00048	0.0540652	3.9984	0.026494	4.09673	0.090788	0.99856	0.99856	1.06899	1.06899	1.07054	1.07054	0.0461427	0.353177	0.474953	1	0.5344	0.5344
10709417	Olr86	NM_001000747	D3ZQM4	D3ZQM4_RAT	D3ZQM4_RAT Olfactory receptor OS=Rattus norvegicus (Rat) GN=Olr86 PE=3 SV=1	Olr86	405014	Olfactory receptor	3.57723	0.00633733	3.55811	0.0473616	3.57444	0.0347433	0.986834	0.986834	0.998066	0.998066	1.01138	1.01138	0.192522	0.131588	0.919568	0.9329	1	0.9329
10709419	Olr87	NM_001000543	D3ZGP3	D3ZGP3_RAT	D3ZGP3_RAT Olfactory receptor OS=Rattus norvegicus (Rat) GN=Olr87 PE=3 SV=1	Olr87	365329	Olfactory receptor	3.98827	0.0478502	4.13925	0.0367003	4.10923	0.0516786	1.11033	1.11033	1.08746	1.08746	0.979402	0.979402	0.678775	0.915354	0.125542	0.133	0.223	0.9138
10709421	Olr88	NM_001000746	A0A0G2JTV9	A0A0G2JTV9_RAT	A0A0G2JTV9_RAT Olfactory receptor OS=Rattus norvegicus (Rat) GN=Olr88 PE=3 SV=1	Olr88	405013	Olfactory receptor	3.28332	0.0366157	3.35692	0.0365719	3.18562	0.0610837	1.05234	1.05234	0.934522	0.934522	0.888042	0.888042	0.174131	0.714567	0.111314	0.58	0.3601	0.0981
10709424	Olr89	NM_001000745	M0R9X7	M0R9X7_RAT	M0R9X7_RAT Olfactory receptor OS=Rattus norvegicus (Rat) GN=Olr89 PE=3 SV=1	Olr89	405012	Olfactory receptor	3.76251	0.141994	3.71907	0.0425678	3.65446	0.040497	0.970338	0.970338	0.927839	0.927839	0.956202	0.956202	0.069243	0.188957	0.700543	0.9291	0.6793	0.8746
10709427	Olr91	NM_001000139	M0RDW4	M0RDW4_RAT	M0RDW4_RAT Olfactory receptor OS=Rattus norvegicus (Rat) GN=Olr91 PE=3 SV=1	Olr91	293232	Olfactory receptor	4.03654	0.061521	3.94523	0.0391457	3.88766	0.0521686	0.938673	0.938673	0.901954	0.901954	0.960882	0.960882	0.104794	0.853976	0.180391	0.4463	0.1631	0.6972
10709430	Olr96	NM_001001025	D4AEP2	D4AEP2_RAT	D4AEP2_RAT Olfactory receptor OS=Rattus norvegicus (Rat) GN=Olr96 PE=3 SV=1	Olr96	405910	Olfactory receptor	3.71452	0.0791608	3.75518	0.00179367	3.86106	0.0520449	1.02859	1.02859	1.10692	1.10692	1.07615	1.07615	0.14214	0.0172951	0.232111	0.8625	0.2244	0.4192
10709432	Olr98	NM_001000143	D3ZY06	D3ZY06_RAT	D3ZY06_RAT Olfactory receptor OS=Rattus norvegicus (Rat) GN=Olr98 PE=3 SV=1	Olr98	293240	Olfactory receptor	3.4412	0.006287	3.34694	0.091431	3.50837	0.0928481	0.936753	0.936753	1.04766	1.04766	1.1184	1.1184	0.00884693	0.0367267	0.367144	0.6722	0.7945	0.3403
10709434	Olr101	NM_001000744	D4ACY0	D4ACY0_RAT	D4ACY0_RAT Protein Olr101 OS=Rattus norvegicus (Rat) GN=Olr101 PE=4 SV=1	Olr101	405009	Protein Olr101	3.09134	0.0208832	3.14314	0.0976525	3.39187	0.0964915	1.03656	1.03656	1.2316	1.2316	1.18816	1.18816	0.37702	0.241943	0.0779633	0.9	0.0847	0.1486
10709436	Olr103	NM_001000144	D3ZCE8	D3ZCE8_RAT	D3ZCE8_RAT Olfactory receptor OS=Rattus norvegicus (Rat) GN=Olr103 PE=3 SV=1	Olr103	293242	Olfactory receptor	3.46973	0.0735933	3.45814	0.1041	3.52007	0.0321078	0.991995	0.991995	1.03551	1.03551	1.04386	1.04386	0.792602	0.365116	0.832657	0.9867	0.9018	0.829
10709438	Olr107	NM_001000148	F1M857	F1M857_RAT	F1M857_RAT Protein Olr107 OS=Rattus norvegicus (Rat) GN=Olr107 PE=4 SV=2	Olr107	293246	Protein Olr107	4.22377	0	4.24606	0.0222933	4.17192	0.0303016	1.01557	1.01557	0.964695	0.964695	0.949903	0.949903	0.0267435	0	0.121537	0.7336	0.2976	0.1131
10709442	Olr108	NM_001000149	D4ACT9	D4ACT9_RAT	D4ACT9_RAT Olfactory receptor OS=Rattus norvegicus (Rat) GN=Olr108 PE=3 SV=1	Olr108	293247	Olfactory receptor	4.43624	0.0156567	4.50963	0.0859367	4.44425	0.0667566	1.05218	1.05218	1.00557	1.00557	0.955694	0.955694	0.141333	0.196172	0.677257	0.6946	0.9934	0.756
10709444	Olr110	NM_001000743	D4ABG1	D4ABG1_RAT	D4ABG1_RAT Olfactory receptor OS=Rattus norvegicus (Rat) GN=Olr110 PE=3 SV=1	Olr110	405007	Olfactory receptor	3.52532	0.0259853	3.50343	0.0321553	3.49933	0	0.984942	0.984942	0.98215	0.98215	0.997164	0.997164	0.177707	0	0.706883	0.7785	0.724	0.9947
10709446	---	NM_001000742	---	---	---	---	---	---	3.33138	0.0912018	3.3373	0.061459	3.42461	0.0695267	1.00411		1.06676		1.06239		0.40091	0.871269	0.611965	0.9978	0.6459	0.6821
10709448	---	NM_001000150	---	---	---	---	---	---	3.39042	0.0415178	3.59514	0.0459922	3.4528	0.0813783	1.15247		1.04419		0.906047		0.56217	0.610801	0.125513	0.1174	0.7478	0.2991
10709450	Olr122	NM_001000156	D3ZKU2	D3ZKU2_RAT	D3ZKU2_RAT Olfactory receptor OS=Rattus norvegicus (Rat) GN=Olr122 PE=3 SV=1	Olr122	293258	Olfactory receptor	3.13265	0.0220827	3.13777	0.0451379	3.06487	0.0400502	1.00356	1.06878	0.954107	1.01628	0.950724	0.950872	0.216502	0.678284	0.379623	0.998	0.4561	0.4268
10709452	Olr122	NM_001000156	D3ZKU2	D3ZKU2_RAT	D3ZKU2_RAT Olfactory receptor OS=Rattus norvegicus (Rat) GN=Olr122 PE=3 SV=1	Olr122	293258	Olfactory receptor	3.35356	0.022098	3.53498	0.175734	3.46253	0.0799317	1.134	1.06878	1.07845	1.01628	0.95102	0.950872	0.000683645	0.0810086	0.548273	0.5223	0.7895	0.883
10709454	Olr132	NM_001001273	D3ZTS9	D3ZTS9_RAT	D3ZTS9_RAT Olfactory receptor OS=Rattus norvegicus (Rat) GN=Olr132 PE=3 SV=1	Olr132	293271	Olfactory receptor	3.565	0.0461773	3.65598	0.044803	3.4794	0.103377	1.06509	1.06509	0.942391	0.942391	0.884797	0.884797	0.314739	0.465859	0.289287	0.6455	0.7018	0.2629
10709456	---	ENSRNOT00000022332	---	---	---	---	---	---	4.30647	0.0601471	4.35924	0	4.43914	0.0799017	1.03725		1.09632		1.05695		0.00129388	0	0.321957	0.7942	0.2981	0.6095
10709458	Olr136	NM_001000160	D3ZCZ7	D3ZCZ7_RAT	D3ZCZ7_RAT Olfactory receptor OS=Rattus norvegicus (Rat) GN=Olr136 PE=3 SV=1	Olr136	293273	Olfactory receptor	4.11546	0.01035	4.15722	0.130466	4.02568	0.100124	1.02937	1.02937	0.93967	0.93967	0.912859	0.912859	0.0746249	0.0724632	0.639624	0.9452	0.8031	0.6237
10709462	Olr135	NM_001001288	D4A084	D4A084_RAT	D4A084_RAT Olfactory receptor OS=Rattus norvegicus (Rat) GN=Olr135 PE=3 SV=1	Olr135	405913	Olfactory receptor	4.77361	0.0111679	4.79184	0.027882	4.6332	0.0816579	1.01271	1.01271	0.907262	0.907262	0.895872	0.895872	0.00829403	0.103466	0.124372	0.9708	0.1932	0.1438
10709464	LOC499219	NM_001047938	Q6QI87	Q6QI87_RAT	Q6QI87_RAT LRRG00121 OS=Rattus norvegicus (Rat) GN=LOC499219 PE=2 SV=1	LOC499219	499219	LRRG00121	5.60459	0.0364246	5.66331	0.0883579	5.47533	0.101206	1.04154	1.04154	0.9143	0.9143	0.877834	0.877834	0.413292	0.496579	0.307098	0.8573	0.532	0.2919
10709467	Olr137	NM_001001283	D3ZCZ1	D3ZCZ1_RAT	D3ZCZ1_RAT Olfactory receptor OS=Rattus norvegicus (Rat) GN=Olr137 PE=3 SV=1	Olr137	405003	Olfactory receptor	3.97559	0.0961467	4.10737	0.161934	4.18813	0.085558	1.09565	1.09565	1.15872	1.15872	1.05757	1.05757	0.641198	0.68807	0.499869	0.7358	0.4763	0.8869
10709469	Olr139	NM_001000161	D3ZLF3	D3ZLF3_RAT	D3ZLF3_RAT Olfactory receptor OS=Rattus norvegicus (Rat) GN=Olr139 PE=3 SV=2	Olr139	293278	Olfactory receptor	4.76708	0.0360437	4.85756	0.0484457	4.73748	0.0939452	1.06473	1.06473	0.979694	0.979694	0.920134	0.920134	0.137146	0.437863	0.438821	0.5925	0.9546	0.44
10709471	Olr140	NM_001000162	M0R8C9	M0R8C9_RAT	M0R8C9_RAT Olfactory receptor OS=Rattus norvegicus (Rat) GN=Olr140 PE=3 SV=1	Olr140	293279	Olfactory receptor	4.59695	0.0351287	4.54067	0.046758	4.65765	0.0784036	0.961741	0.961741	1.04297	1.04297	1.08446	1.08446	0.940036	0.621129	0.385804	0.7687	0.7224	0.3569
10709473	Olr143	NM_001000163	D3ZLR2	D3ZLR2_RAT	D3ZLR2_RAT Olfactory receptor OS=Rattus norvegicus (Rat) GN=Olr143 PE=3 SV=1	Olr143	293281	Olfactory receptor	4.92882	0.165302	4.78645	0.122626	4.85501	0.140016	0.906027	0.906027	0.950123	0.950123	1.04867	1.04867	0.566556	0.929798	0.794893	0.7775	0.9312	0.9427
10709475	Olr148	NM_001000165	D3ZLM3	D3ZLM3_RAT	D3ZLM3_RAT Olfactory receptor OS=Rattus norvegicus (Rat) GN=Olr148 PE=3 SV=1	Olr148	293285	Olfactory receptor	4.28485	0	4.40731	0.101528	4.27726	0.0995042	1.08859	1.08859	0.994754	0.994754	0.913799	0.913799	0.0867134	0	0.501525	0.5598	1	0.5598
10709477	Trim34	ENSRNOT00000055210	D3ZA88	D3ZA88_RAT	D3ZA88_RAT Protein Trim34 OS=Rattus norvegicus (Rat) GN=Trim34 PE=4 SV=3	Trim34	101241893	Protein Trim34	5.78187	0.0645221	5.7906	0.0663893	5.75082	0.0668491	1.00607	1.00607	0.978706	0.978706	0.972804	0.972804	0.616167	0.999467	0.90957	0.9939	0.9468	0.9081
10709491	Olr152	NM_001000546	D4A7N5	D4A7N5_RAT	D4A7N5_RAT Olfactory receptor OS=Rattus norvegicus (Rat) GN=Olr152 PE=3 SV=1	Olr152	365332	Olfactory receptor	3.60242	0.027624	3.63776	0.007713	3.63678	0.0371981	1.0248	1.0248	1.02411	1.02411	0.999326	0.999326	0.152049	0.195311	0.59593	0.6483	0.6483	1
10709493	Olr153	NM_001000167	D4A7N0	D4A7N0_RAT	D4A7N0_RAT Olfactory receptor OS=Rattus norvegicus (Rat) GN=Olr153 PE=3 SV=1	Olr153	293301	Olfactory receptor	3.89276	0.0479886	3.90252	0.0429411	4.14586	0.072005	1.00679	1.00679	1.19177	1.19177	1.18373	1.18373	0.108939	0.789653	0.0308194	0.9913	0.0425	0.0497
10709495	Olr154	NM_001000547	A0A0G2JUH1	A0A0G2JUH1_RAT	A0A0G2JUH1_RAT Olfactory receptor OS=Rattus norvegicus (Rat) GN=Olr154 PE=3 SV=1	Olr154	365333	Olfactory receptor	4.146	0.037692	4.17665	0.0683363	4.0397	0.0699789	1.02147	1.02147	0.928969	0.928969	0.909445	0.909445	0.367363	0.70059	0.306805	0.9335	0.4632	0.3089
10709497	Olr155	NM_001000168	M0R7M7	M0R7M7_RAT	M0R7M7_RAT Protein Olr155 OS=Rattus norvegicus (Rat) GN=Olr155 PE=4 SV=1	Olr155	293302	Protein Olr155	4.12826	0.0624413	4.20268	0.0300371	4.21218	0.0363503	1.05294	1.05294	1.05989	1.05989	1.0066	1.0066	0.194532	0.529169	0.384932	0.4891	0.4121	0.9863
10709499	Olr157	NM_001000169	F1M5V0	F1M5V0_RAT	F1M5V0_RAT Olfactory receptor OS=Rattus norvegicus (Rat) GN=Olr157 PE=3 SV=1	Olr157	293304	Olfactory receptor	3.72947	0.0269631	3.72121	0.0446756	3.61644	0.0414127	0.994296	0.994296	0.924647	0.924647	0.929952	0.929952	0.374258	0.793232	0.144029	0.9918	0.1745	0.2037
10709503	Olr158	NM_001000548	D4A730	D4A730_RAT	D4A730_RAT Olfactory receptor 158 (Predicted) OS=Rattus norvegicus (Rat) GN=Olr158 PE=4 SV=1	Olr158	365334	Olfactory receptor 158 (Predicted)	3.73667	0.0602306	3.7811	0.066663	3.81353	0.0878487	1.03127	1.03127	1.05472	1.05472	1.02274	1.02274	0.579351	0.852692	0.767457	0.9091	0.7493	0.9448
10709505	Olr159	NM_001000170	M0R9Z9	M0R9Z9_RAT	M0R9Z9_RAT Protein Olr159 OS=Rattus norvegicus (Rat) GN=Olr159 PE=4 SV=1	Olr159	293305	Protein Olr159	3.45441	0.0218007	3.55257	0.0182217	3.69276	0.0816934	1.0704	1.0704	1.17964	1.17964	1.10205	1.10205	0.115204	0.117779	0.0419512	0.4291	0.0362	0.1928
10709507	Olr160	NM_001000738	M0R7Y1	M0R7Y1_RAT	M0R7Y1_RAT Olfactory receptor OS=Rattus norvegicus (Rat) GN=Olr160 PE=3 SV=1	Olr160	404999	Olfactory receptor	3.72549	0.074273	3.84788	0.0868118	3.76546	0.0943657	1.08854	1.08854	1.0281	1.0281	0.944475	0.944475	0.543431	0.9557	0.5818	0.567	0.9401	0.7563
10709509	Olr161	NM_001001000	D3ZXX1	D3ZXX1_RAT	D3ZXX1_RAT Protein LOC100910670 OS=Rattus norvegicus (Rat) GN=Olr161 PE=4 SV=1	Olr161	405364	Protein LOC100910670	3.10401	0.0439279	3.10922	0.0208979	3.12985	0.00428467	1.00362	1.00362	1.01807	1.01807	1.01441	1.01441	0.0119829	0.0356285	0.778259	0.9962	0.792	0.8351
10709511	Olr162	NM_001000950	M0RB85	M0RB85_RAT	M0RB85_RAT Protein LOC100910716 OS=Rattus norvegicus (Rat) GN=Olr162 PE=4 SV=1	Olr162	405295	Protein LOC100910716	3.0673	0.123042	3.31528	0.0826566	3.30905	0.098058	1.18755	1.18755	1.18243	1.18243	0.995689	0.995689	0.0680811	0.872848	0.235335	0.2827	0.2988	0.9988
10709514	Olr163	NM_001000171	M0R856	M0R856_RAT	M0R856_RAT Protein LOC100910075 OS=Rattus norvegicus (Rat) GN=Olr163 PE=4 SV=1	Olr163	293309	Protein LOC100910075	3.52702	0.053803	3.55366	0.027162	3.54705	0.033765	1.01864	1.01864	1.01399	1.01399	0.995434	0.995434	0.00128002	0.655778	0.885748	0.8839	0.9324	0.9922
10709516	Olr164	NM_001000737	M0R9M1	M0R9M1_RAT	M0R9M1_RAT Protein LOC100909686 OS=Rattus norvegicus (Rat) GN=Olr164 PE=4 SV=1	Olr164	404998	Protein LOC100909686	3.71568	0.0226872	3.69838	0.0686855	3.73261	0.0432959	0.988082	0.988082	1.0118	1.0118	1.02401	1.02401	0.409225	0.42212	0.872831	0.9558	0.969	0.8615
10709520	Olr168	NM_001000174	D3ZF02	D3ZF02_RAT	D3ZF02_RAT Protein Olr168 OS=Rattus norvegicus (Rat) GN=Olr168 PE=4 SV=1	Olr168	293315	Protein Olr168	3.46489	0.0451463	3.50296	0.0777044	3.53941	0.0449457	1.02674	1.02674	1.05301	1.05301	1.02559	1.02559	0.1737	0.720773	0.673056	0.8831	0.6488	0.9005
10709522	---	ENSRNOT00000040846	---	---	---	---	---	---	4.52393	0.0456316	4.87147	0.105668	4.8928	0.0775867	1.27238		1.29134		1.0149		0.370135	0.611232	0.0307941	0.0513	0.0413	0.9828
10709528	Olr171	NM_001000176	D3ZB08	D3ZB08_RAT	D3ZB08_RAT Olfactory receptor OS=Rattus norvegicus (Rat) GN=Olr171 PE=3 SV=1	Olr171	293318	Olfactory receptor	3.51425	0.0833248	3.45063	0.0587735	3.36348	0.0559913	0.956856	0.956856	0.900769	0.900769	0.941384	0.941384	0.717714	0.838892	0.335382	0.7702	0.3089	0.6514
10709530	---	ENSRNOT00000023265	---	---	---	---	---	---	3.62587	0.0983216	3.52103	0.0179867	3.50685	0.0317526	0.929909		0.920811		0.990216		0.00116174	0.120084	0.385224	0.5	0.4062	0.9799
10709534	Olr178	NM_001000179	D4A3G5	D4A3G5_RAT	D4A3G5_RAT Olfactory receptor OS=Rattus norvegicus (Rat) GN=Olr178 PE=3 SV=1	Olr178	293325	Olfactory receptor	3.93526	0.0326344	3.99037	0.0145741	4.02825	0.0229977	1.03894	1.03894	1.06658	1.06658	1.0266	1.0266	0.754966	0.644849	0.103829	0.3632	0.0908	0.5424
10709536	Olr185	NM_001000183	D4A3F2	D4A3F2_RAT	D4A3F2_RAT Olfactory receptor OS=Rattus norvegicus (Rat) GN=Olr185 PE=3 SV=1	Olr185	293330	Olfactory receptor	3.86153	0.0134493	3.89568	0.111061	3.8726	0.0239716	1.02395	1.02395	1.0077	1.0077	0.984131	0.984131	0.428189	0.0285461	0.914334	0.9093	0.9893	0.9582
10709538	Olr186	NM_001001031	D3ZXV7	D3ZXV7_RAT	D3ZXV7_RAT Olfactory receptor OS=Rattus norvegicus (Rat) GN=Olr186 PE=3 SV=1	Olr186	405917	Olfactory receptor	3.20842	0.0643302	3.0925	0.125525	2.98009	0.0385829	0.922797	0.922797	0.853625	0.853625	0.925041	0.925041	0.287699	0.346242	0.252345	0.6168	0.2275	0.6642
10709540	Olr188	NM_001001032	D4A2W3	D4A2W3_RAT	D4A2W3_RAT Olfactory receptor OS=Rattus norvegicus (Rat) GN=Olr188 PE=3 SV=1	Olr188	405918	Olfactory receptor	3.83181	0.0578901	3.98285	0.0343154	3.92147	0.061614	1.11037	1.11037	1.06412	1.06412	0.958346	0.958346	0.602624	0.761151	0.197417	0.1792	0.4685	0.7136
10709542	Olr189	NM_001000184	D3ZAJ3	D3ZAJ3_RAT	D3ZAJ3_RAT Olfactory receptor OS=Rattus norvegicus (Rat) GN=Olr189 PE=3 SV=1	Olr189	293333	Olfactory receptor	4.24588	0.0270211	4.37097	0.0383277	4.39626	0.0569824	1.09058	1.09058	1.10987	1.10987	1.01768	1.01768	0.801972	0.612626	0.104118	0.1923	0.1108	0.9034
10709544	Olr190	NM_001000185	D4A7I0	D4A7I0_RAT	D4A7I0_RAT Protein Olr190 OS=Rattus norvegicus (Rat) GN=Olr190 PE=4 SV=1	Olr190	293334	Protein Olr190	4.05431	0.0240832	3.97119	0.0903957	4.04882	0.0238846	0.944014	0.944014	0.996205	0.996205	1.05529	1.05529	0.203749	0.180593	0.515522	0.5515	0.9961	0.5979
10709546	Olr198	NM_001001033	D3ZYY2	D3ZYY2_RAT	D3ZYY2_RAT Protein Olr198 OS=Rattus norvegicus (Rat) GN=Olr198 PE=4 SV=1	Olr198	405919	Protein Olr198	3.18796	0.0837255	3.12164	0.172305	3.26085	0.187432	0.955071	0.955071	1.05182	1.05182	1.1013	1.1013	0.41084	0.604406	0.825336	0.9498	0.9448	0.81
10709548	Olr199	NM_001001034	D3ZJR3	D3ZJR3_RAT	D3ZJR3_RAT Olfactory receptor OS=Rattus norvegicus (Rat) GN=Olr199 PE=3 SV=1	Olr199	405920	Olfactory receptor	3.77202	0.0456242	3.78035	0.121802	3.73911	0.0462789	1.00579	1.00579	0.977447	0.977447	0.971819	0.971819	0.71427	0.30693	0.926005	0.9923	0.9618	0.9225
10709550	Olr200	NM_001000189	D3ZMC9	D3ZMC9_RAT	D3ZMC9_RAT Protein Olr200 OS=Rattus norvegicus (Rat) GN=Olr200 PE=4 SV=1	Olr200	293340	Protein Olr200	3.4457	0.0567718	3.49891	0.0457385	3.4311	0.0358006	1.03757	1.03757	0.989928	0.989928	0.954085	0.954085	0.235309	0.810647	0.595595	0.6951	0.988	0.6113
10709552	RGD1561034	ENSRNOT00000040672	D3ZHR1	D3ZHR1_RAT	D3ZHR1_RAT Protein RGD1561034 OS=Rattus norvegicus (Rat) GN=RGD1561034 PE=4 SV=2	RGD1561034	308908	Protein RGD1561034	4.39909	0.0864414	4.48584	0.108933	4.21024	0.123941	1.06198	1.06198	0.877302	0.877302	0.826102	0.826102	0.676573	0.893623	0.261892	0.8403	0.481	0.2483
10709556	Cnga4	NM_053496	G3V898	G3V898_RAT	G3V898_RAT Cyclic nucleotide-gated cation channel alpha-4 OS=Rattus norvegicus (Rat) GN=Cnga4 PE=4 SV=1	Cnga4	85258	Cyclic nucleotide-gated cation channel alpha-4	3.92528	0.0217272	3.86218	0.0855715	3.87682	0.0411077	0.957205	0.957205	0.96697	0.96697	1.0102	1.0102	0.0127599	0.28227	0.732463	0.7272	0.8376	0.9771
10709565	Cckbr	NM_013165	P30553	GASR_RAT	GASR_RAT Gastrin/cholecystokinin type B receptor OS=Rattus norvegicus (Rat) GN=Cckbr PE=2 SV=1	Cckbr	25706	Gastrin/cholecystokinin type B receptor	5.00122	0.0306283	4.98886	0.0486123	4.84463	0.176129	0.99147	0.99147	0.897144	0.897144	0.904863	0.904863	0.454188	0.0903777	0.54805	0.9957	0.5808	0.6304
10709575	Smpd1	NM_001006997	Q5XIA6	Q5XIA6_RAT	Q5XIA6_RAT Sphingomyelin phosphodiesterase OS=Rattus norvegicus (Rat) GN=Smpd1 PE=1 SV=1	Smpd1	308909	Sphingomyelin phosphodiesterase	9.78166	0.0416606	9.14601	0.0460917	8.66677	0.0338266	0.643651	0.643651	0.461726	0.461726	0.717354	0.717354	0.204144	0.920164	4.16051e-06	0.0001	0	0.0004
10709582	Timm10b	NM_053371	Q9R1B1	T10B_RAT	T10B_RAT Mitochondrial import inner membrane translocase subunit Tim10 B OS=Rattus norvegicus (Rat) GN=Timm10b PE=3 SV=1	Timm10b	84384	Mitochondrial import inner membrane translocase subunit Tim10 B	6.2475	0.0686955	6.20285	0.158337	6.47471	0.113245	0.969524	0.969524	1.17057	1.17057	1.20737	1.20737	0.533923	0.590405	0.300607	0.9645	0.4244	0.3156
10709586	---	ENSRNOT00000049737	---	---	---	---	---	---	5.18873	0.150695	5.23706	0.0867126	5.38292	0.00633777	1.03407		1.14409		1.10639		0.00147013	0.0183085	0.420375	0.943	0.4177	0.5865
10709629	Ilk	NM_133409	Q99J82	ILK_RAT	ILK_RAT Integrin-linked protein kinase OS=Rattus norvegicus (Rat) GN=Ilk PE=2 SV=1	Ilk	170922	Integrin-linked protein kinase	9.25375	0.0390736	9.18158	0.0493977	9.11644	0.051054	0.951205	0.951205	0.909214	0.909214	0.955854	0.955854	0.910099	0.928367	0.187301	0.5292	0.1665	0.6143
10709644	---	XR_009025	---	---	---	---	---	---	6.10222	0.095376	5.71538	0.0896273	5.75918	0.032479	0.764805		0.788378		1.03082		0.478908	0.453679	0.0268441	0.0331	0.051	0.9334
10709646	Olr203	NM_001000191	D3ZYS6	D3ZYS6_RAT	D3ZYS6_RAT Protein Olr203 OS=Rattus norvegicus (Rat) GN=Olr203 PE=4 SV=1	Olr203	293350	Protein Olr203	3.96665	0.0564644	4.00736	0.0896647	3.92881	0.106244	1.02862	1.02862	0.974117	0.974117	0.947014	0.947014	0.487798	0.711192	0.825134	0.9428	0.9516	0.8098
10709649	Olr210	NM_001000195	D3ZNF0	D3ZNF0_RAT	D3ZNF0_RAT Protein Olr210 OS=Rattus norvegicus (Rat) GN=Olr210 PE=4 SV=1	Olr210	293357	Protein Olr210	3.76978	0.0917243	3.60731	0.0333508	3.68378	0.0218147	0.893493	0.893493	0.942135	0.942135	1.05444	1.05444	0.0243153	0.188935	0.210079	0.1877	0.5631	0.6322
10709651	Olr214	NM_001000197	M0RDA9	M0RDA9_RAT	M0RDA9_RAT Protein Olr214 OS=Rattus norvegicus (Rat) GN=Olr214 PE=4 SV=1	Olr214	293361	Protein Olr214	3.47839	0.1009	3.66142	0.088453	3.50454	0.0998279	1.13526	1.13526	1.01829	1.01829	0.896965	0.896965	0.994809	0.987847	0.416323	0.4397	0.9842	0.5259
10709654	Olr215	NM_001000198	D3ZT49	D3ZT49_RAT	D3ZT49_RAT Protein Olr215 OS=Rattus norvegicus (Rat) GN=Olr215 PE=4 SV=1	Olr215	293362	Protein Olr215	3.96319	0.00399458	3.97179	0.00791567	3.90297	0.0317022	1.00597	1.00597	0.959116	0.959116	0.953421	0.953421	0.00525207	0.0524321	0.075761	0.9637	0.1257	0.0903
10709657	---	NM_001000552	---	---	---	---	---	---	3.98361	3.14018e-16	4.00714	0.0649059	4.11614	0.173327	1.01644		1.09621		1.07848		0.000703397	0	0.669521	0.9833	0.6739	0.7721
10709659	LOC100912097	NM_001000203	F1M8E2	F1M8E2_RAT	F1M8E2_RAT Olfactory receptor OS=Rattus norvegicus (Rat) GN=LOC100912097 PE=3 SV=2	LOC100912097	293370	Olfactory receptor	3.97206	0.0361283	4.02237	0.0367077	3.99138	0.0145633	1.03549	1.03549	1.01348	1.01348	0.97875	0.97875	0.484162	0.580616	0.562922	0.5386	0.8974	0.7881
10709661	Olr230	NM_001000205	D4A9W9	D4A9W9_RAT	D4A9W9_RAT Olfactory receptor OS=Rattus norvegicus (Rat) GN=Olr230 PE=3 SV=1	Olr230	293374	Olfactory receptor	4.41165	0.0128964	4.5048	0.0621377	4.51783	0.139801	1.0667	1.0667	1.07638	1.07638	1.00907	1.00907	0.0130126	0.0465666	0.676737	0.746	0.7009	0.9965
10709663	Olr231	NM_001000206	F1M571	F1M571_RAT	F1M571_RAT Olfactory receptor OS=Rattus norvegicus (Rat) GN=Olr231 PE=3 SV=2	Olr231	293375	Olfactory receptor	3.93742	0.0172967	3.91485	0.0398633	3.99838	0.103869	0.98448	0.98448	1.04316	1.04316	1.0596	1.0596	0.466481	0.0988886	0.625318	0.9733	0.75	0.6244
10709665	Olr234	NM_001000208	D3ZN10	D3ZN10_RAT	D3ZN10_RAT Olfactory receptor OS=Rattus norvegicus (Rat) GN=Olr234 PE=3 SV=1	Olr234	293379	Olfactory receptor	4.01634	0.0435679	4.10568	0.0328177	4.35163	0.0642838	1.06388	1.06388	1.26163	1.26163	1.18588	1.18588	0.31259	0.676465	0.00746179	0.4468	0.0071	0.0295
10709667	Nlrp14	ENSRNOT00000051854	F1M918	F1M918_RAT	F1M918_RAT Protein Nlrp14 OS=Rattus norvegicus (Rat) GN=Nlrp14 PE=4 SV=3	Nlrp14	499234	Protein Nlrp14	3.33835	0.0315184	3.30938	0.0938768	3.55727	0.185134	0.98012	0.98012	1.16386	1.16386	1.18747	1.18747	0.0144324	0.151081	0.349725	0.9834	0.456	0.3755
10709674	---	XR_006886	---	---	---	---	---	---	5.37916	0.0767573	5.17231	0.0611949	5.0991	0.0247868	0.866424		0.823558		0.950524		0.377872	0.428559	0.0347452	0.1015	0.0337	0.6663
10709679	Syt9	NM_053324	Q925C0	SYT9_RAT	SYT9_RAT Synaptotagmin-9 OS=Rattus norvegicus (Rat) GN=Syt9 PE=1 SV=1	Syt9	60564	Synaptotagmin-9	4.8906	0.201514	4.66617	0.0204416	4.52143	0.0186339	0.855937	0.855937	0.77423	0.77423	0.904541	0.904541	0.0119366	0.00733984	0.157712	0.4248	0.1413	0.6588
10709687	Olfml1	NM_001013192	Q66H86	OLFL1_RAT	OLFL1_RAT Olfactomedin-like protein 1 OS=Rattus norvegicus (Rat) GN=Olfml1 PE=2 SV=1	Olfml1	361621	Olfactomedin-like protein 1	6.48494	0.134528	6.59672	0.263209	6.49737	0.0823922	1.08056	1.08056	1.00865	1.00865	0.933454	0.933454	0.963114	0.347126	0.893437	0.9009	0.9984	0.9222
10709691	---	ENSRNOT00000049641	---	---	---	---	---	---	7.76802	0.0713669	8.26362	0.207594	9.25341	0.0467307	1.4099		2.79993		1.9859		0.0937453	0.146828	0.000516429	0.0771	0.0005	0.0039
10709718	Olr235	NM_001000209	F1LUC6	F1LUC6_RAT	F1LUC6_RAT Olfactory receptor OS=Rattus norvegicus (Rat) GN=Olr235 PE=3 SV=2	Olr235	293381	Olfactory receptor	4.47517	0.0102264	4.50303	0.0201369	4.46206	0.036527	1.0195	1.0195	0.990958	0.990958	0.972001	0.972001	0.119233	0.235618	0.536791	0.7337	0.9226	0.5191
10709721	Olr241	NM_001000734	D4AAR2	D4AAR2_RAT	D4AAR2_RAT Olfactory receptor OS=Rattus norvegicus (Rat) GN=Olr241 PE=3 SV=1	Olr241	404992	Olfactory receptor	3.47146	0.0211157	3.63668	0.0687029	3.60552	0.0642873	1.12133	1.05658	1.09737	1.03965	0.978635	0.984319	0.0628064	0.387024	0.165424	0.1731	0.2792	0.9233
10709723	Olr241	NM_001000734	D4AAR2	D4AAR2_RAT	D4AAR2_RAT Olfactory receptor OS=Rattus norvegicus (Rat) GN=Olr241 PE=3 SV=1	Olr241	404992	Olfactory receptor	3.41171	0.022601	3.39989	0.0107797	3.38539	0.0172872	0.99184	1.05658	0.981924	1.03965	0.990003	0.984319	0.117198	0.589483	0.529038	0.8608	0.5013	0.7937
10709725	Olr242	NM_001000213	D3ZST0	D3ZST0_RAT	D3ZST0_RAT Olfactory receptor OS=Rattus norvegicus (Rat) GN=Olr242 PE=3 SV=1	Olr242	293387	Olfactory receptor	3.38871	0.0710344	3.54576	0.0611551	3.33314	0.0432371	1.11501	1.03506	0.962218	1.01132	0.86297	0.986613	0.638266	0.810614	0.0989141	0.229	0.7785	0.0955
10709727	Olr242	NM_001000213	D3ZST0	D3ZST0_RAT	D3ZST0_RAT Olfactory receptor OS=Rattus norvegicus (Rat) GN=Olr242 PE=3 SV=1	Olr242	293387	Olfactory receptor	3.35305	0.00684934	3.28678	0.0961651	3.43768	0.032084	0.955108	1.03506	1.06042	1.01132	1.11026	0.986613	0.0193226	0.0261971	0.266603	0.7119	0.5976	0.242
10709729	Olr245	NM_001000215	D3ZL33	D3ZL33_RAT	D3ZL33_RAT Protein Olr245 OS=Rattus norvegicus (Rat) GN=Olr245 PE=4 SV=1	Olr245	293390	Protein Olr245	3.62375	0.118865	3.84254	0.0723858	3.82069	0.0780653	1.16375	1.16375	1.14626	1.14626	0.984968	0.984968	0.0587525	0.802208	0.254011	0.2813	0.3486	0.9824
10709731	Olr246	NM_001000216	D3ZS23	D3ZS23_RAT	D3ZS23_RAT Olfactory receptor OS=Rattus norvegicus (Rat) GN=Olr246 PE=3 SV=1	Olr246	293391	Olfactory receptor	4.02971	0.0176692	3.96536	0.034635	4.06255	0.05661	0.956376	0.956376	1.02302	1.02302	1.06969	1.06969	0.107761	0.368313	0.268682	0.5285	0.7949	0.2493
10709733	Olr247	NM_001000217	D3ZVZ0	D3ZVZ0_RAT	D3ZVZ0_RAT Olfactory receptor OS=Rattus norvegicus (Rat) GN=Olr247 PE=3 SV=1	Olr247	293392	Olfactory receptor	3.24262	0.0583209	3.34878	0.0645302	3.42265	0.0209439	1.07636	1.07636	1.13291	1.13291	1.05253	1.05253	0.442833	0.344645	0.115217	0.3813	0.1012	0.5659
10709735	Olr250	NM_001001037	D4A403	D4A403_RAT	D4A403_RAT Olfactory receptor OS=Rattus norvegicus (Rat) GN=Olr250 PE=3 SV=1	Olr250	405923	Olfactory receptor	3.06473	0.0571719	3.15587	0.0432444	3.19759	0.0642907	1.06521	1.06521	1.09646	1.09646	1.02934	1.02934	0.190934	0.882153	0.310418	0.538	0.2947	0.8557
10709737	Olr260	NM_001000946	D4A5L8	D4A5L8_RAT	D4A5L8_RAT Olfactory receptor OS=Rattus norvegicus (Rat) GN=Olr260 PE=3 SV=2	Olr260	405290	Olfactory receptor	3.41234	0.041429	3.48268	0.0523225	3.45736	0.123457	1.04996	1.04996	1.03169	1.03169	0.9826	0.9826	0.501759	0.317601	0.823069	0.8135	0.9107	0.9766
10709739	Olr263	NM_001000220	M0RAZ5	M0RAZ5_RAT	M0RAZ5_RAT Olfactory receptor OS=Rattus norvegicus (Rat) GN=Olr263 PE=3 SV=1	Olr263	293399	Olfactory receptor	3.47352	0.0562214	3.51604	0.0167047	3.50089	0.0437651	1.02991	1.02991	1.01915	1.01915	0.989553	0.989553	0.252858	0.37082	0.797666	0.787	0.8968	0.9728
10709741	Olr264	NM_001000999	A0A0G2K7N4	A0A0G2K7N4_RAT	A0A0G2K7N4_RAT Olfactory receptor OS=Rattus norvegicus (Rat) GN=Olr264 PE=3 SV=1	Olr264	405363	Olfactory receptor	2.77433	0.0196388	2.79629	0.0411577	2.76275	0.0199547	1.01534	1.01534	0.992001	0.992001	0.977017	0.977017	0.167744	0.48553	0.715935	0.8735	0.9409	0.6968
10709744	---	ENSRNOT00000035046	---	---	---	---	---	---	2.71299	0.0861241	2.72139	0.0371699	2.87772	0.0465886	1.00584		1.12096		1.11445		0.651554	0.532551	0.181583	0.9967	0.2204	0.2427
10709746	Olr267	NM_001000228	M0R529	M0R529_RAT	M0R529_RAT Olfactory receptor OS=Rattus norvegicus (Rat) GN=Olr267 PE=3 SV=2	Olr267	293435	Olfactory receptor	3.82427	0.029854	3.8421	0.0477915	3.91127	0.156304	1.01244	1.01244	1.06216	1.06216	1.04911	1.04911	0.597399	0.11264	0.790297	0.988	0.7905	0.8655
10709749	Olr268	NM_001000733	A0A0G2KAI4	A0A0G2KAI4_RAT	A0A0G2KAI4_RAT Olfactory receptor OS=Rattus norvegicus (Rat) GN=Olr268 PE=3 SV=1	Olr268	404989	Olfactory receptor	3.50676	0	3.50267	0.004085	3.50676	0	0.997172	0.997172	1	1	1.00284	1.00284	3.21749e-07	0	0.421875	0.4827	1	0.4827
10709751	Olr270	NM_001000229	A0A0G2K9E7	A0A0G2K9E7_RAT	A0A0G2K9E7_RAT Olfactory receptor OS=Rattus norvegicus (Rat) GN=Olr270 PE=3 SV=1	Olr270	293437	Olfactory receptor	3.14541	0.0865626	3.13176	0.0275373	3.01542	0.0880021	0.990579	0.990579	0.913832	0.913832	0.922523	0.922523	0.448074	0.420587	0.42552	0.9906	0.4561	0.5232
10709753	Olr271	NM_001000732	A0A0G2K6G0	A0A0G2K6G0_RAT	A0A0G2K6G0_RAT Olfactory receptor OS=Rattus norvegicus (Rat) GN=Olr271 PE=3 SV=1	Olr271	404988	Olfactory receptor	3.33938	0.0349816	3.37331	0.0632838	3.28182	0.0550104	1.0238	1.0238	0.960891	0.960891	0.938556	0.938556	0.68293	0.767056	0.474788	0.9131	0.6803	0.4583
10709755	Olr272	NM_001000230	A0A0G2JWZ6	A0A0G2JWZ6_RAT	A0A0G2JWZ6_RAT Olfactory receptor OS=Rattus norvegicus (Rat) GN=Olr272 PE=3 SV=1	Olr272	293439	Olfactory receptor	3.60962	0.0822527	3.55566	0.024353	3.49332	0.0945223	0.963291	0.963291	0.922554	0.922554	0.957711	0.957711	0.152026	0.269123	0.587555	0.8854	0.5613	0.8246
10709757	---	ENSRNOT00000033054	---	---	---	---	---	---	3.16367	0.0496703	3.26233	0.0292677	3.25894	0.0726008	1.07077		1.06826		0.997651		0.550895	0.529796	0.387418	0.4382	0.4596	0.9989
10709759	---	ENSRNOT00000033024	---	---	---	---	---	---	2.97189	0.0722513	2.9619	0.042875	3.13825	0.0669515	0.993101		1.12222		1.13002		0.259259	0.742487	0.155901	0.9928	0.2173	0.1882
10709761	Olr276	NM_001000227	A0A0G2KAK5	A0A0G2KAK5_RAT	A0A0G2KAK5_RAT Olfactory receptor OS=Rattus norvegicus (Rat) GN=Olr276 PE=3 SV=1	Olr276	293431	Olfactory receptor	3.4311	0.12738	3.71821	0.0846509	3.54997	0.014584	1.2202	1.2202	1.08589	1.08589	0.889928	0.889928	0.0514175	0.0782732	0.14817	0.1322	0.6401	0.4158
10709763	Nlrp10	NM_001106291	D3ZUA2	D3ZUA2_RAT	D3ZUA2_RAT Protein Nlrp10 OS=Rattus norvegicus (Rat) GN=Nlrp10 PE=4 SV=1	Nlrp10	293426	Protein Nlrp10	3.74375	0.0133802	3.69471	0.140663	3.6186	0.0404347	0.966577	0.966577	0.916911	0.916911	0.948616	0.948616	0.565299	0.0279639	0.603476	0.9124	0.5805	0.8097
10709766	Olr281	NM_001000225	M0R9T8	M0R9T8_RAT	M0R9T8_RAT Olfactory receptor OS=Rattus norvegicus (Rat) GN=Olr281 PE=3 SV=1	Olr281	293425	Olfactory receptor	3.70505	0.0519293	3.70094	0.056031	3.82367	0.0363978	0.997161	0.997161	1.0857	1.0857	1.08879	1.08879	0.0579382	0.814662	0.225588	0.9987	0.2883	0.272
10709769	Olr282	NM_001000224	F1M488	F1M488_RAT	F1M488_RAT Olfactory receptor OS=Rattus norvegicus (Rat) GN=Olr282 PE=3 SV=2	Olr282	293424	Olfactory receptor	4.96638	0.0316591	4.92424	0.014809	4.94778	0.00873533	0.971213	0.971213	0.987193	0.987193	1.01645	1.01645	0.0282202	0.356057	0.41191	0.3879	0.8514	0.6734
10709771	Olr283	NM_001001010	F1LTK3	F1LTK3_RAT	F1LTK3_RAT Olfactory receptor OS=Rattus norvegicus (Rat) GN=Olr283 PE=3 SV=1	Olr283	405384	Olfactory receptor	4.65219	0.150933	4.8538	0.0253397	4.87346	0.0864309	1.14998	1.14998	1.16576	1.16576	1.01372	1.01372	0.0212948	0.166797	0.298376	0.3897	0.3314	0.9893
10709773	Olr285	NM_001000223	D4A4L3	D4A4L3_RAT	D4A4L3_RAT Olfactory receptor OS=Rattus norvegicus (Rat) GN=Olr285 PE=3 SV=1	Olr285	293421	Olfactory receptor	3.63717	0.0428318	3.75328	0.041156	3.57884	0.0908878	1.08381	1.08381	0.960373	0.960373	0.88611	0.88611	0.220621	0.502633	0.218331	0.4385	0.8054	0.2049
10709775	Hmgb1	BC088402	P63159	HMGB1_RAT	HMGB1_RAT High mobility group protein B1 OS=Rattus norvegicus (Rat) GN=Hmgb1	Hmgb1	25459	High mobility group protein B1	10.5594	0.0863895	10.688	0.032493	10.8004	0.01071	1.0932	1.09216	1.18185	1.18538	1.08109	1.08467	0.208232	0.0628555	0.0492854	0.2807	0.0416	0.3474
10709779	Rpl27a	NM_001106290	P18445	RL27A_RAT	RL27A_RAT 60S ribosomal protein L27a OS=Rattus norvegicus (Rat) GN=Rpl27a PE=1 SV=3	Rpl27a	293418	60S ribosomal protein L27a	10.1052	0.0756951	10.2501	0.125562	10.2746	0.0407294	1.10566	1.10566	1.12459	1.10693	1.01712	1.00729	0.954137	0.400216	0.393467	0.5165	0.4099	0.9748
10709784	---	ENSRNOT00000052871	---	---	---	---	---	---	6.39857	0.0916408	7.07889	0.0500274	7.30669	0.12326	1.6025		1.8766		1.17105		0.374396	0.564647	0.0010715	0.0048	0.0011	0.257
10709786	---	ENSRNOT00000033178	---	---	---	---	---	---	6.93351	0.182452	6.54243	0.285326	6.35507	0.108106	0.762558		0.669686		0.87821		0.167532	0.49798	0.208293	0.4237	0.1955	0.8024
10709788	Akip1	NM_001108497	D3ZV70	D3ZV70_RAT	D3ZV70_RAT Protein Akip1 OS=Rattus norvegicus (Rat) GN=Akip1 PE=4 SV=1	Akip1	361624	Protein Akip1	8.60867	0.214453	8.46839	0.168816	8.4702	0.238726	0.907343	0.907343	0.908481	0.908481	1.00125	1.00125	0.620535	0.905298	0.870421	0.8865	0.8963	0.9997
10709796	---	ENSRNOT00000055153	---	---	---	---	---	---	5.29399	0.0341523	5.09553	0.0732869	5.27264	0.171231	0.871477		0.985307		1.13062		0.633351	0.169147	0.422658	0.4494	0.9876	0.5264
10709799	Ipo7	NM_001107545	D4AE96	D4AE96_RAT	D4AE96_RAT Importin 7 (Predicted), isoform CRA_c OS=Rattus norvegicus (Rat) GN=Ipo7 PE=1 SV=1	Ipo7	308939	Importin 7 (Predicted), isoform CRA_c	10.6692	0.0270467	10.8702	0.124027	11.1686	0.129658	1.14943	1.14943	1.41363	1.41363	1.22985	1.22985	0.20463	0.207338	0.0388646	0.3996	0.0333	0.1914
10709825	---	ENSRNOT00000052442	---	---	---	---	---	---	7.39494	0.0922963	7.8897	0.0743848	7.93478	0.0834801	1.40909		1.45382		1.03174		0.182819	0.969011	0.00724357	0.0144	0.0097	0.9306
10709827	Zfp143	NM_001012169	A0A0H2UHI0	A0A0H2UHI0_RAT	A0A0H2UHI0_RAT Zinc finger protein 143 OS=Rattus norvegicus (Rat) GN=Zfp143 PE=1 SV=1	Zfp143	361627	Zinc finger protein 143	8.31853	0.0372006	8.67768	0.0974988	10.0585	0.126754	1.28267	1.28267	3.34035	3.34035	2.60421	2.60421	0.0284617	0.353208	2.91789e-05	0.082	0	0.0001
10709844	Wee1	NM_001012742	Q63802	WEE1_RAT	WEE1_RAT Wee1-like protein kinase OS=Rattus norvegicus (Rat) GN=Wee1 PE=1 SV=1	Wee1	308937	Wee1-like protein kinase	6.82168	0.190452	7.6569	0.163904	7.48738	0.0631288	1.78414	1.78414	1.58634	1.58634	0.889137	0.889137	0.608844	0.42123	0.0170299	0.018	0.0454	0.7243
10709858	---	ENSRNOT00000052920	---	---	---	---	---	---	3.64965	0.0659996	3.85849	0.0506988	3.82898	0.104523	1.15576		1.13236		0.979756		0.942983	0.641917	0.197347	0.2134	0.3007	0.9584
10709860	Swap70	NM_001106288	D3ZRE7	D3ZRE7_RAT	D3ZRE7_RAT Protein Swap70 OS=Rattus norvegicus (Rat) GN=Swap70 PE=1 SV=1	Swap70	293410	Protein Swap70	6.62386	0.0457836	6.73535	0.165049	6.37275	0.0155263	1.08034	1.08034	0.840253	0.840253	0.777765	0.777765	0.251219	0.030825	0.0988135	0.7423	0.2431	0.0934
10709873	---	ENSRNOT00000038421	---	---	---	---	---	---	6.07692	0.0300714	6.15357	0.0312807	6.14721	0.0514859	1.05457		1.04993		0.995603		0.262703	0.70955	0.388369	0.4234	0.4806	0.9925
10709875	Adm	NM_012715	P43145	ADML_RAT	ADML_RAT ADM OS=Rattus norvegicus (Rat) GN=Adm PE=2 SV=1	Adm	25026	ADM	6.50729	0.218675	7.0849	0.0559052	7.35735	0.13418	1.49237	1.49237	1.80257	1.80257	1.20786	1.20786	0.263876	0.295837	0.0191291	0.0785	0.0174	0.4649
10709880	Ampd3	NM_031544	O09178	AMPD3_RAT	AMPD3_RAT AMP deaminase 3 OS=Rattus norvegicus (Rat) GN=Ampd3 PE=1 SV=2	Ampd3	25095	AMP deaminase 3	6.67511	0.0262085	7.20845	0.152991	12.0307	0.0225856	1.44728	1.44728	40.9448	40.9448	28.291	28.291	0.00124327	0.0359767	2.16205e-08	0.0132	0	0
10709895	Ctr9	ENSRNOT00000023741	G3V897	G3V897_RAT	G3V897_RAT Protein Ctr9 OS=Rattus norvegicus (Rat) GN=Ctr9 PE=1 SV=1	Ctr9	293184	Protein Ctr9	8.90386	0.0190007	8.79433	0.206892	9.09071	0.0800264	0.926895	0.926895	1.13828	1.13828	1.22805	1.22805	0.0663258	0.0395486	0.32866	0.8243	0.5915	0.3072
10709923	Usp47	NM_001107542	B2GVC1	B2GVC1_RAT	B2GVC1_RAT Usp47 protein OS=Rattus norvegicus (Rat) GN=Usp47 PE=2 SV=1	Usp47	308896	Usp47 protein	10.8781	0.0811284	10.8549	0.107291	10.8451	0.0814596	0.984023	0.984023	0.977343	0.977343	0.993212	0.993212	0.283556	0.901712	0.96568	0.9822	0.9641	0.9967
10709951	Mical2	ENSRNOT00000021858	D4A1F2	MICA2_RAT	MICA2_RAT Protein-methionine sulfoxide oxidase MICAL2 OS=Rattus norvegicus (Rat) GN=Mical2 PE=3 SV=1	Mical2	365352	Protein-methionine sulfoxide oxidase MICAL2	9.05174	0.239254	9.38637	0.148159	11.3852	0.128298	1.26105	1.26105	5.04006	5.04006	3.9967	3.9967	0.0543043	0.696988	0.000178744	0.4338	0.0002	0.0005
10709979	Micalcl	NM_182669	Q4G091	MICLK_RAT	MICLK_RAT MICAL C-terminal-like protein OS=Rattus norvegicus (Rat) GN=Micalcl PE=1 SV=1	Micalcl	293180	MICAL C-terminal-like protein	4.19443	0.0623437	4.25677	0	4.28495	0.037335	1.04416	1.04416	1.06476	1.06476	1.01973	1.01973	0.00125269	0	0.367128	0.572	0.3548	0.8984
10709993	Parva	NM_020656	Q9HB97	PARVA_RAT	PARVA_RAT Alpha-parvin OS=Rattus norvegicus (Rat) GN=Parva PE=1 SV=2	Parva	57341	Alpha-parvin	8.23111	0.102738	8.13998	0.0948025	7.97888	0.115917	0.938786	0.938786	0.839599	0.839599	0.894345	0.894345	0.965488	0.971297	0.293655	0.8124	0.2738	0.5518
10710006	---	ENSRNOT00000055138	---	---	---	---	---	---	9.75164	0.0816342	9.83159	0.0608186	10.0095	0.0459677	1.05698		1.19568		1.13121		0.704803	0.770917	0.0700815	0.6879	0.0657	0.1935
10710024	---	XR_009191	---	---	---	---	---	---	6.06402	0.0403351	6.06669	0.0483625	5.78966	0.0705357	1.00186		0.826821		0.825288		0.0575304	0.755111	0.0171039	1	0.0264	0.0264
10710026	---	ENSRNOT00000043405	---	---	---	---	---	---	4.78599	0.181727	4.5105	0.00788239	4.47021	0.00762371	0.826169		0.803417		0.972461		0.000163482	0.000303414	0.147421	0.2314	0.1644	0.9605
10710028	Arntl	NM_024362	D3ZT62	D3ZT62_RAT	D3ZT62_RAT Aryl hydrocarbon receptor nuclear translocator-like protein 1 OS=Rattus norvegicus (Rat) GN=Arntl PE=1 SV=2	Arntl	29657	Aryl hydrocarbon receptor nuclear translocator-like protein 1	8.36565	0.26052	8.30083	0.221383	9.19547	0.0926485	0.956064	0.956064	1.77747	1.77747	1.85915	1.85915	0.433563	0.453622	0.0392112	0.9717	0.0667	0.0502		Clock genes
10710051	Far1	NM_001011933	Q66H50	FACR1_RAT	FACR1_RAT Fatty acyl-CoA reductase 1 OS=Rattus norvegicus (Rat) GN=Far1 PE=2 SV=1	Far1	293173	Fatty acyl-CoA reductase 1	8.86461	0.126451	8.75269	0.139356	8.69338	0.0455496	0.925356	0.925356	0.888085	0.888085	0.959723	0.959723	0.996756	0.387182	0.579997	0.7738	0.5605	0.9243
10710063	---	ENSRNOT00000034750	---	---	---	---	---	---	7.50017	0.0496726	8.21896	0.166247	8.54997	0.101551	1.64581		2.07025		1.25789		0.161615	0.375141	0.00193834	0.0114	0.0017	0.1943
10710067	Spon1	NM_172067	P35446	SPON1_RAT	SPON1_RAT Spondin-1 OS=Rattus norvegicus (Rat) GN=Spon1 PE=1 SV=1	Spon1	64456	Spondin-1	6.0384	0.093477	5.7336	0.0215762	5.85629	0.0441457	0.809551	0.809551	0.881413	0.881413	1.08877	1.08877	0.289542	0.210879	0.0344717	0.0297	0.1637	0.4126
10710087	---	ENSRNOT00000054414	---	---	---	---	---	---	7.5235	0.0251115	7.6167	0.0960604	7.60941	0.0742689	1.06674		1.06136		0.99496		0.190308	0.293998	0.620294	0.6615	0.6804	0.9994
10710089	Pde3b	NM_017229	Q63085	PDE3B_RAT	PDE3B_RAT cGMP-inhibited 3',5'-cyclic phosphodiesterase B OS=Rattus norvegicus (Rat) GN=Pde3b PE=2 SV=1	Pde3b	29516	cGMP-inhibited 3',5'-cyclic phosphodiesterase B	5.76443	0.0800527	6.28236	0.0814532	5.90342	0.139292	1.4319	1.4319	1.10113	1.10113	0.769001	0.769001	0.74828	0.719461	0.0304365	0.0293	0.634	0.0937
10710106	Calcb	NM_138513	P10093	CALCB_RAT	CALCB_RAT Calcitonin gene-related peptide 2 OS=Rattus norvegicus (Rat) GN=Calcb PE=2 SV=1	Calcb	171519	Calcitonin gene-related peptide 2	4.17416	0.117596	4.12239	0.0510301	4.15004	0	0.964753	0.964753	0.98342	0.98342	1.01935	1.01935	0.0541801	0	0.88235	0.872	0.9736	0.9569
10710111	Insc	NM_001106285	D3ZFP7	D3ZFP7_RAT	D3ZFP7_RAT Hypothetical LOC293166 (Predicted), isoform CRA_b OS=Rattus norvegicus (Rat) GN=Insc PE=4 SV=1	Insc	293166	Hypothetical LOC293166 (Predicted), isoform CRA_b	5.75288	0.103777	5.56928	0.006919	5.48255	0.0992261	0.8805	0.8805	0.82913	0.82913	0.941658	0.941658	0.618549	0.0306174	0.146123	0.3472	0.1351	0.7391
10710126	---	ENSRNOT00000055121	---	---	---	---	---	---	7.12198	0.0987944	6.82555	0.0741049	6.34934	0.186916	0.814261		0.585344		0.718865		0.76191	0.488911	0.0151788	0.3072	0.013	0.0889
10710129	RGD1311703	NM_001013898	G3V8R0	G3V8R0_RAT	G3V8R0_RAT Protein RGD1311703 OS=Rattus norvegicus (Rat) GN=RGD1311703 PE=1 SV=1	RGD1311703	293160	Protein RGD1311703	9.42617	0.111135	9.58332	0.0898127	9.85488	0.0617464	1.11508	1.11508	1.34603	1.34603	1.20712	1.20712	0.935184	0.799177	0.0416065	0.4847	0.0366	0.1691
10710135	Nucb2	NM_021663	Q9JI85	NUCB2_RAT	NUCB2_RAT Nucleobindin-2 OS=Rattus norvegicus (Rat) GN=Nucb2 PE=1 SV=1	Nucb2	59295	Nucleobindin-2	8.22615	0.172955	9.06372	0.16877	9.53252	0.15799	1.78703	1.78703	2.47319	2.47319	1.38397	1.38397	0.906604	0.991589	0.00400528	0.0276	0.0034	0.1925
10710154	---	ENSRNOT00000025007	---	---	---	---	---	---	7.36	0.0428155	6.54486	0.0833471	6.48172	0.0672895	0.568353		0.544014		0.957176		0.0248454	0.715043	0.000150221	0.0003	0.0002	0.7705
10710166	---	XR_009250	---	---	---	---	---	---	9.62849	0.0610028	9.51577	0.111524	9.20263	0.0363493	0.924842		0.744397		0.80489		0.333072	0.377231	0.0183066	0.5894	0.0178	0.06
10710170	---	ENSRNOT00000055109	---	---	---	---	---	---	4.06378	0.0345297	4.07785	0.0786826	4.04108	0.0478092	1.0098		0.984393		0.974841		0.68192	0.585657	0.915253	0.9916	0.9553	0.9116
10710172	Tmc5	NM_001012216	Q5M7W4	TMC5_RAT	TMC5_RAT Transmembrane channel-like protein 5 OS=Rattus norvegicus (Rat) GN=Tmc5 PE=1 SV=2	Tmc5	365360	Transmembrane channel-like protein 5	3.74799	0.0586673	3.80666	3.14018e-16	3.80634	0.0284038	1.0415	1.0415	1.04127	1.04127	0.999774	0.999774	0.000829051	0	0.48741	0.5464	0.5464	1
10710179	Ccp110	NM_001108501	D4A3J9	D4A3J9_RAT	D4A3J9_RAT Protein Ccp110 OS=Rattus norvegicus (Rat) GN=Ccp110 PE=4 SV=3	Ccp110	361634	Protein Ccp110	5.39321	0.0606862	5.85155	0.0265973	6.1927	0.155563	1.37396	1.37396	1.74048	1.74048	1.26676	1.26676	0.752492	0.116985	0.00354304	0.0399	0.0029	0.1013
10710194	---	BC083805	Q5XI83	CP062_RAT	CP062_RAT UPF0505 protein C16orf62 homolog OS=Rattus norvegicus (Rat) PE=2 SV=1	---	361635	UPF0505 protein C16orf62 homolog	7.65946	0.0461489	7.91567	0.0829386	8.60907	0.0289252	1.19434	1.19434	1.93135	1.93135	1.61709	1.61709	0.0675136	0.440133	5.52203e-05	0.0412	0.0001	0.0003
10710226	---	XM_001078328	---	---	---	---	---	---	5.11566	0.0561226	5.05064	0.145358	5.0186	0.0372236	0.955933		0.934937		0.978036		0.948229	0.207694	0.781992	0.885	0.7717	0.9725
10710236	Acsm5	NM_001014162	Q6AYT9	ACSM5_RAT	ACSM5_RAT Acyl-coenzyme A synthetase ACSM5, mitochondrial OS=Rattus norvegicus (Rat) GN=Acsm5 PE=2 SV=1	Acsm5	361637	Acyl-coenzyme A synthetase ACSM5, mitochondrial	5.12417	0.244675	5.31064	0.275298	4.63333	0.1087	1.13798	1.13798	0.711612	0.711612	0.625331	0.625331	0.309045	0.531482	0.163602	0.8234	0.3326	0.1574
10710258	Acsm2	NM_144748	O70490	ACSM2_RAT	ACSM2_RAT Acyl-coenzyme A synthetase ACSM2, mitochondrial OS=Rattus norvegicus (Rat) GN=Acsm2 PE=2 SV=2	Acsm2	246263	Acyl-coenzyme A synthetase ACSM2, mitochondrial	4.05693	0.0141327	4.06285	0.0333773	4.10219	0.0331253	1.00411	1.00411	1.03187	1.03187	1.02764	1.02764	0.932572	0.496729	0.493496	0.9848	0.5128	0.6035
10710280	Acsm4	NM_181695	Q7TN78	ACSM4_RAT	ACSM4_RAT Acyl-coenzyme A synthetase ACSM4, mitochondrial OS=Rattus norvegicus (Rat) GN=Acsm4 PE=2 SV=1	Acsm4	353317	Acyl-coenzyme A synthetase ACSM4, mitochondrial	5.14808	0.05928	5.03122	0.148002	5.08832	0.0222723	0.922192	0.922192	0.959422	0.959422	1.04037	1.04037	0.133595	0.0859076	0.677712	0.6535	0.8938	0.8938
10710295	Acsm3	NM_033231	Q6SKG1	ACSM3_RAT	ACSM3_RAT Acyl-coenzyme A synthetase ACSM3, mitochondrial OS=Rattus norvegicus (Rat) GN=Acsm3 PE=2 SV=1	Acsm3	24763	Acyl-coenzyme A synthetase ACSM3, mitochondrial	3.52208	0.0218197	3.53858	0.00531633	3.59913	0.102553	1.0115	1.0115	1.05486	1.05486	1.04286	1.04286	0.000305915	0.003408	0.636082	0.9793	0.6392	0.7495
10710313	---	NM_001079706	A1A5R7	REXON_RAT	REXON_RAT Putative RNA exonuclease NEF-sp OS=Rattus norvegicus (Rat) PE=2 SV=1	---	309036	Putative RNA exonuclease NEF-sp	3.71548	0.0130823	3.73018	0.00162033	3.73405	0.00548333	1.01024	1.01024	1.01295	1.01295	1.00268	1.00268	0.000266443	0	0.316961	0.5508	0.3	0.8514
10710333	Lyrm1	NM_001108918	B2RYU8	LYRM1_RAT	LYRM1_RAT LYR motif-containing protein 1 OS=Rattus norvegicus (Rat) GN=Lyrm1 PE=2 SV=1	Lyrm1	365361	LYR motif-containing protein 1	7.12343	0.07156	7.0874	0.100926	7.46346	0.117125	0.975338	0.975338	1.26578	1.26578	1.29779	1.29779	0.476221	0.80597	0.065239	0.9627	0.1098	0.0786
10710338	---	ENSRNOT00000053994	---	---	---	---	---	---	2.95405	0.189127	2.71757	0.0583902	2.99703	0.118795	0.848816		1.03025		1.21374		0.0778593	0.38665	0.342604	0.4651	0.9712	0.3594
10710340	Abca15	NM_001106293	D4ACN5	D4ACN5_RAT	D4ACN5_RAT Protein Abca15 OS=Rattus norvegicus (Rat) GN=Abca15 PE=1 SV=2	Abca15	293442	Protein Abca15	3.5598	0.053041	3.39813	0.0543127	3.52353	0.0111556	0.893992	0.893992	0.975176	0.975176	1.09081	1.09081	0.0436545	0.130673	0.0896553	0.0892	0.8121	0.1977
10710380	Abca16	ENSRNOT00000001933	D3ZQI3	D3ZQI3_RAT	D3ZQI3_RAT Protein Abca16 OS=Rattus norvegicus (Rat) GN=Abca16 PE=4 SV=3	Abca16	293444	Protein Abca16	3.9947	0.0870736	4.08791	0.190881	3.99139	0.032501	1.06674	1.06674	0.997708	0.997708	0.935283	0.935283	0.0387439	0.130341	0.817223	0.8456	1	0.8456
10710409	---	ENSRNOT00000054222	---	---	---	---	---	---	4.08106	0.0532022	4.33856	0.0388697	4.177	0.139725	1.1954		1.06876		0.894063		0.685317	0.244806	0.202266	0.1859	0.7514	0.4494
10710411	---	ENSRNOT00000055060	---	---	---	---	---	---	4.66506	0.003736	4.61813	0.024805	4.62644	0.0348753	0.967998		0.973592		1.00578		0.00697516	0.0696999	0.45645	0.4734	0.5746	0.9801
10710418	---	XM_001079239	---	---	---	---	---	---	3.11914	0.0354577	3.06064	0	3.00974	0.0876488	0.960258		0.926972		0.965337		0.0756894	0	0.408865	0.7244	0.3802	0.7964
10710427	Uqcrc2	NM_001006970	P32551	QCR2_RAT	QCR2_RAT Cytochrome b-c1 complex subunit 2, mitochondrial OS=Rattus norvegicus (Rat) GN=Uqcrc2 PE=1 SV=2	Uqcrc2	293448	Cytochrome b-c1 complex subunit 2, mitochondrial	12.0011	0.0311713	11.5791	0.00370006	11.0386	0.0607107	0.746381	0.746381	0.51316	0.51316	0.687531	0.687531	0.276886	0.0229495	8.85356e-06	0.0007	0	0.0002			Oxidative phosphorylation
10710442	---	ENSRNOT00000036226	---	---	---	---	---	---	8.34831	0.0931233	8.52985	0.0850201	8.44056	0.0575046	1.13409		1.06603		0.939987		0.866975	0.806804	0.343222	0.315	0.6992	0.7327
10710446	Vwa3a	NM_001079885	A1A5Q7	VWA3A_RAT	VWA3A_RAT von Willebrand factor A domain-containing protein 3A OS=Rattus norvegicus (Rat) GN=Vwa3a PE=2 SV=1	Vwa3a	293449	von Willebrand factor A domain-containing protein 3A	4.86299	0.0614073	4.93815	0.111526	4.89792	0	1.05348	1.05348	1.0245	1.0245	0.972497	0.972497	0.0876454	0	0.787523	0.7695	0.9345	0.9345
10710480	---	ENSRNOT00000034578	---	---	---	---	---	---	5.5134	0.151278	5.58546	0.149106	5.61352	0.0803874	1.05122		1.07186		1.01964		0.0781962	0.702695	0.866064	0.9189	0.8646	0.9914
10710494	Eef2k	NM_012947	P70531	EF2K_RAT	EF2K_RAT Eukaryotic elongation factor 2 kinase OS=Rattus norvegicus (Rat) GN=Eef2k PE=1 SV=1	Eef2k	25435	Eukaryotic elongation factor 2 kinase	9.4975	0.0346015	9.55423	0.116291	8.78278	0.063558	1.04011	1.04011	0.609325	0.609325	0.585829	0.585829	0.137893	0.352749	0.00078028	0.8545	0.0017	0.0011
10710513	Polr3e	NM_001108503	D3ZP45	D3ZP45_RAT	D3ZP45_RAT Polymerase (RNA) III (DNA directed) polypeptide E (Predicted) OS=Rattus norvegicus (Rat) GN=Polr3e PE=1 SV=1	Polr3e	361640	Polymerase (RNA) III (DNA directed) polypeptide E (Predicted)	7.65271	0.00800455	8.28694	0.0303675	8.52286	0.11037	1.55211	1.55211	1.82785	1.82785	1.17766	1.17766	0.102214	0.0272954	0.000218439	0.0012	0.0002	0.0963
10710534	LOC691551	ENSRNOT00000039447	F1M4T5	F1M4T5_RAT	F1M4T5_RAT Protein LOC691551 OS=Rattus norvegicus (Rat) GN=LOC691551 PE=4 SV=3	LOC691551	691551	Protein LOC691551	3.72412	0.0439622	3.62953	0.118373	3.56251	0.0774873	0.93654	0.93654	0.894027	0.894027	0.954606	0.954606	0.156544	0.496663	0.447221	0.7169	0.421	0.8496
10710541	Mettl9	ENSRNOT00000039186	D3ZZ04	D3ZZ04_RAT	D3ZZ04_RAT Protein LOC100362944 OS=Rattus norvegicus (Rat) GN=Mettl9 PE=1 SV=1	Mettl9	100302453	Protein LOC100362944	9.73285	0.102732	9.97736	0.122364	9.56034	0.0871212	1.18469	1.18469	0.887296	0.887296	0.74897	0.74897	0.991814	0.915625	0.078592	0.2919	0.5226	0.0686
10710546	Otoa	ENSRNOT00000023591	D4A6R6	D4A6R6_RAT	D4A6R6_RAT Protein Otoa OS=Rattus norvegicus (Rat) GN=Otoa PE=4 SV=1	Otoa	499260	Protein Otoa	3.84175	0.0720623	3.8018	0.016868	3.75473	0.0801704	0.972687	0.972687	0.941466	0.941466	0.967903	0.967903	0.725696	0.187689	0.637287	0.8942	0.6119	0.8597
10710575	Hs3st2	NM_181370	Q80W66	HS3S2_RAT	HS3S2_RAT Heparan sulfate glucosamine 3-O-sulfotransferase 2 OS=Rattus norvegicus (Rat) GN=Hs3st2 PE=1 SV=1	Hs3st2	293451	Heparan sulfate glucosamine 3-O-sulfotransferase 2	4.16846	0.139893	3.9833	0.110549	3.98483	0.163669	0.879548	0.879548	0.880484	0.880484	1.00106	1.00106	0.974101	0.887956	0.587806	0.6361	0.6456	0.9998
10710580	Scnn1g	NM_017046	P37091	SCNNG_RAT	SCNNG_RAT Amiloride-sensitive sodium channel subunit gamma OS=Rattus norvegicus (Rat) GN=Scnn1g PE=1 SV=2	Scnn1g	24768	Amiloride-sensitive sodium channel subunit gamma	4.79438	0.0593154	4.91262	0.0861601	4.88676	0.0931419	1.08541	1.08541	1.06613	1.06613	0.982236	0.982236	0.127138	0.841483	0.601388	0.6053	0.7214	0.9771
10710595	Scnn1b	NM_012648	P37090	SCNNB_RAT	SCNNB_RAT Amiloride-sensitive sodium channel subunit beta OS=Rattus norvegicus (Rat) GN=Scnn1b PE=1 SV=2	Scnn1b	24767	Amiloride-sensitive sodium channel subunit beta	5.23284	0	5.26857	0.0378465	5.16822	0.0838321	1.02508	1.02508	0.956196	0.956196	0.932804	0.932804	0.00106507	0	0.451125	0.8789	0.6911	0.4288
10710611	Ubfd1	NM_001034911	Q3MIF1	Q3MIF1_RAT	Q3MIF1_RAT Protein Ubfd1 OS=Rattus norvegicus (Rat) GN=Ubfd1 PE=1 SV=1	Ubfd1	293454	Protein Ubfd1	7.67	0.110463	7.84278	0.0478616	8.71888	0.112732	1.12723	1.12723	2.06893	2.06893	1.83541	1.83541	0.0943998	0.542498	0.000473938	0.4577	0.0006	0.0014
10710620	Dctn5	NM_001037778	Q4KM59	Q4KM59_RAT	Q4KM59_RAT Dynactin 5 OS=Rattus norvegicus (Rat) GN=Dctn5 PE=2 SV=1	Dctn5	308961	Dynactin 5	9.5915	0.0605435	9.38802	0.0664253	9.71155	0.070075	0.86845	0.86845	1.08677	1.08677	1.25139	1.25139	0.851907	0.982421	0.0389425	0.1666	0.4602	0.034
10710627	Plk1	NM_017100	Q62673	PLK1_RAT	PLK1_RAT Serine/threonine-protein kinase PLK1 OS=Rattus norvegicus (Rat) GN=Plk1 PE=2 SV=2	Plk1	25515	Serine/threonine-protein kinase PLK1	5.09618	0.0915063	4.92728	0.0218732	4.86726	0.09702	0.889521	0.889521	0.853274	0.853274	0.959251	0.959251	0.120646	0.205013	0.173571	0.3407	0.1681	0.8393
10710639	Chp2	NM_182738	Q810D1	CHP2_RAT	CHP2_RAT Calcineurin B homologous protein 2 OS=Rattus norvegicus (Rat) GN=Chp2 PE=1 SV=1	Chp2	308965	Calcineurin B homologous protein 2	6.49183	0.102686	6.5711	0.0908528	6.13517	0.0940404	1.05648	1.05648	0.780973	0.780973	0.739219	0.739219	0.93674	0.989501	0.0399316	0.8306	0.0894	0.0429
10710647	Prkcb	NM_012713	P68403	KPCB_RAT	KPCB_RAT Protein kinase C beta type OS=Rattus norvegicus (Rat) GN=Prkcb PE=1 SV=3	Prkcb	25023	Protein kinase C beta type	5.44916	0.0990567	5.17175	0.143126	5.07799	0.145586	0.825072	0.825072	0.773157	0.773157	0.937078	0.937078	0.288376	0.878206	0.196137	0.3574	0.193	0.8719
10710669	Cacng3	NM_080691	Q8VHX0	CCG3_RAT	CCG3_RAT Voltage-dependent calcium channel gamma-3 subunit OS=Rattus norvegicus (Rat) GN=Cacng3 PE=1 SV=1	Cacng3	140724	Voltage-dependent calcium channel gamma-3 subunit	4.27787	0.0724773	4.30996	0.161874	4.28206	0.0293686	1.0225	1.0225	1.00291	1.00291	0.980846	0.980846	0.645949	0.144119	0.972309	0.977	1	0.977
10710674	---	ENSRNOT00000049430	---	---	---	---	---	---	8.83871	0.011376	9.36543	0.0766024	9.58004	0.0445278	1.44065		1.67172		1.16039		0.0707211	0.101767	0.000138261	0.0009	0.0001	0.0588
10710695	Tnrc6a	NM_001107549	F1M9Y8	F1M9Y8_RAT	F1M9Y8_RAT Protein Tnrc6a OS=Rattus norvegicus (Rat) GN=Tnrc6a PE=1 SV=3	Tnrc6a	308971	Protein Tnrc6a	8.4737	0.0717893	8.72932	0.117476	8.91923	0.0713976	1.19385	1.19385	1.36181	1.36181	1.14069	1.14069	0.676557	0.737804	0.0342893	0.1912	0.029	0.3505
10710718	---	ENSRNOT00000018476	---	---	---	---	---	---	4.27468	0.0105527	4.21551	0.00826433	4.20749	0.01628	0.959816		0.954498		0.994459		0.503108	0.477428	0.0103862	0.0242	0.0122	0.8189
10710739	Lcmt1	NM_199405	Q6P4Z6	LCMT1_RAT	LCMT1_RAT Leucine carboxyl methyltransferase 1 OS=Rattus norvegicus (Rat) GN=Lcmt1 PE=2 SV=1	Lcmt1	361643	Leucine carboxyl methyltransferase 1	7.26773	0.0433862	7.16504	0.128663	7.04083	0.0872076	0.931296	0.931296	0.854472	0.854472	0.917508	0.917508	0.170868	0.432622	0.305178	0.7441	0.2792	0.6308
10710752	Aqp8	NM_019158	P56405	AQP8_RAT	AQP8_RAT Aquaporin-8 OS=Rattus norvegicus (Rat) GN=Aqp8 PE=2 SV=1	Aqp8	29172	Aquaporin-8	3.92685	0.108683	4.24691	0.0583389	4.04781	0.02093	1.24838	1.24838	1.08745	1.08745	0.871092	0.871092	0.942457	0.174518	0.049763	0.0434	0.4816	0.2038
10710760	---	XR_009309	---	---	---	---	---	---	3.64451	0.0470025	3.81879	0.164988	3.71669	0.153905	1.12841		1.0513		0.931671		0.0138911	0.354807	0.666283	0.6436	0.9195	0.8571
10710764	---	XR_009310	---	---	---	---	---	---	7.52406	0.0933663	7.12409	0.133388	6.20266	0.0311228	0.757873		0.400147		0.527987		0.102386	0.268472	0.000180931	0.0594	0.0002	0.0012
10710766	---	ENSRNOT00000055036	---	---	---	---	---	---	5.93483	0.114634	5.91303	0.102589	5.73767	0.0444385	0.985002		0.872267		0.885549		0.0171039	0.499075	0.332084	0.9871	0.3621	0.4307
10710769	---	ENSRNOT00000020344	---	---	---	---	---	---	8.76924	0.147302	8.9063	0.136119	9.00327	0.157397	1.09966		1.17611		1.06953		0.935102	0.988336	0.556526	0.7889	0.5314	0.891
10710771	Rps15a	NM_053982	P62246	RS15A_RAT	RS15A_RAT 40S ribosomal protein S15a OS=Rattus norvegicus (Rat) GN=Rps15a PE=1 SV=2	Rps15a	117053	40S ribosomal protein S15a	9.54354	0.0466894	9.56366	0.194725	9.60653	0.0206329	1.01404	1.02056	1.04463	1.04072	1.03016	1.01975	0.304246	0.0301728	0.916967	0.9918	0.9133	0.9562
10710773	Kdm8	NM_001037196	Q497B8	KDM8_RAT	KDM8_RAT Lysine-specific demethylase 8 OS=Rattus norvegicus (Rat) GN=Kdm8 PE=2 SV=1	Kdm8	308976	Lysine-specific demethylase 8	8.54073	0.0378599	8.39245	0.0615559	8.26448	0.0634281	0.902325	0.902325	0.825729	0.825729	0.915113	0.915113	0.585135	0.772718	0.0388996	0.2374	0.0327	0.3219
10710782	Il4r	NM_133380	Q63257	IL4RA_RAT	IL4RA_RAT Interleukin-4 receptor subunit alpha OS=Rattus norvegicus (Rat) GN=Il4r PE=2 SV=2	Il4r	25084	Interleukin-4 receptor subunit alpha	7.58992	0.04372	7.89265	0.0783997	8.27864	0.0273627	1.23347	1.23347	1.61185	1.61185	1.30676	1.30676	0.34368	0.411164	0.000329907	0.0178	0.0003	0.0057
10710795	Il21r	NM_001012469	Q5EBB1	Q5EBB1_RAT	Q5EBB1_RAT Interleukin 21 receptor OS=Rattus norvegicus (Rat) GN=Il21r PE=2 SV=1	Il21r	308977	Interleukin 21 receptor	5.48766	0.0262295	5.32324	0.0418026	5.25692	0.028384	0.892286	0.892286	0.852197	0.852197	0.955072	0.955072	0.472513	0.796209	0.00591446	0.026	0.0055	0.3784
10710806	---	ENSRNOT00000001880	---	---	---	---	---	---	5.62151	0.134469	5.90235	0.0354264	6.47838	0.106794	1.2149		1.8111		1.49074		0.783388	0.308023	0.00249634	0.1933	0.0022	0.0155
10710842	Sbk1	NM_147135	Q9Z335	SBK1_RAT	SBK1_RAT Serine/threonine-protein kinase SBK1 OS=Rattus norvegicus (Rat) GN=Sbk1 PE=1 SV=1	Sbk1	113907	Serine/threonine-protein kinase SBK1	5.69193	0.210239	5.23134	0.0703989	4.70728	0.114516	0.726685	0.726685	0.505348	0.505348	0.695415	0.695415	0.815232	0.401502	0.00836345	0.1385	0.0068	0.0912
10710846	Rpl36	NM_022504	P39032	RL36_RAT	RL36_RAT 60S ribosomal protein L36 OS=Rattus norvegicus (Rat) GN=Rpl36 PE=1 SV=2	Rpl36	58927	60S ribosomal protein L36	10.0923	0.0727622	10.2654	0.115376	10.0733	0.0301354	1.12747	1.14609	0.986912	0.999433	0.875333	0.872162	0.0574425	0.295807	0.261494	0.3565	0.9831	0.2892
10710848	Rabep2	NM_030585	Q62835	RABE2_RAT	RABE2_RAT Rab GTPase-binding effector protein 2 OS=Rattus norvegicus (Rat) GN=Rabep2 PE=1 SV=1	Rabep2	80754	Rab GTPase-binding effector protein 2	6.49247	0.0128255	6.48005	0.0192253	6.49028	0.027047	0.991428	0.991428	0.998481	0.998481	1.00711	1.00711	0.0936755	0.628277	0.892363	0.8906	0.9927	0.9364
10710857	Tufm	NM_001106295	P85834	EFTU_RAT	EFTU_RAT Elongation factor Tu, mitochondrial OS=Rattus norvegicus (Rat) GN=Tufm PE=1 SV=1	Tufm	293481	Elongation factor Tu, mitochondrial	9.36696	0.0487444	8.9634	0.103418	8.65562	0.0607294	0.755987	0.755987	0.610752	0.610752	0.807887	0.807887	0.383887	0.629206	0.00156654	0.0206	0.0013	0.0598
10710868	Apobr	NM_001109154	D4A7C9	D4A7C9_RAT	D4A7C9_RAT Protein Apobr OS=Rattus norvegicus (Rat) GN=Apobr PE=4 SV=1	Apobr	499264	Protein Apobr	5.69145	0.0388271	5.62422	0.0294179	5.65437	0.048508	0.954472	0.954472	0.974628	0.974628	1.02112	1.02112	0.133794	0.793224	0.564926	0.5392	0.801	0.8874
10710875	Sgf29	NM_001114502	A0A0G2K9M7	A0A0G2K9M7_RAT	A0A0G2K9M7_RAT Putative uncharacterized protein RGD1310609_predicted OS=Rattus norvegicus (Rat) GN=Sgf29 PE=1 SV=1	Sgf29	293488	Putative uncharacterized protein RGD1310609_predicted	7.937	0.0165949	8.027	0.119889	7.96577	0.00921367	1.06438	1.06438	1.02014	1.02014	0.958442	0.958442	0.000621528	0.00594804	0.667049	0.6518	0.9505	0.8204
10710886	---	ENSRNOT00000026267	---	---	---	---	---	---	8.52086	0.0549757	8.60284	0.0892466	8.85774	0.0414048	1.05847		1.26302		1.19325		0.43872	0.641046	0.0245215	0.6714	0.0245	0.071
10710890	Mapk3	NM_017347	P21708	MK03_RAT	MK03_RAT Mitogen-activated protein kinase 3 OS=Rattus norvegicus (Rat) GN=Mapk3 PE=1 SV=5	Mapk3	50689	Mitogen-activated protein kinase 3	7.29811	0.0370014	7.42332	0.0599046	7.15069	0.0489953	1.09066	1.09066	0.902863	0.902863	0.82781	0.82781	0.789362	0.818193	0.023131	0.2488	0.1743	0.0192
10710901	Gdpd3	ENSRNOT00000026688	D4A1N8	D4A1N8_RAT	D4A1N8_RAT Protein Gdpd3 OS=Rattus norvegicus (Rat) GN=Gdpd3 PE=4 SV=3	Gdpd3	293490	Protein Gdpd3	4.43472	0.0301933	4.44094	0.0737984	4.32916	0.0741607	1.00432	1.00432	0.929443	0.929443	0.925445	0.925445	0.237859	0.472012	0.415436	0.9969	0.4964	0.4585
10710912	Ypel3	ENSRNOT00000026755	D4A0Y3	D4A0Y3_RAT	D4A0Y3_RAT Protein yippee-like OS=Rattus norvegicus (Rat) GN=Ypel3 PE=3 SV=1	Ypel3	293491	Protein yippee-like	7.34996	0.0427895	8.76051	0.163842	8.74818	0.0253631	2.65839	2.65839	2.63577	2.63577	0.991491	0.991491	0.0169382	0.0545086	7.98702e-05	0.0001	0.0001	0.995
10710921	Tbx6	NM_001108920	D3ZJK7	TBX6_RAT	TBX6_RAT T-box transcription factor TBX6 OS=Rattus norvegicus (Rat) GN=Tbx6 PE=3 SV=1	Tbx6	365371	T-box transcription factor TBX6	5.24008	0.0274463	5.19164	0.081656	5.38511	0.085752	0.966978	0.966978	1.10575	1.10575	1.14351	1.14351	0.417543	0.36435	0.222205	0.8732	0.3965	0.2171
10710930	Fam57b	BC161920	B1WBX0	B1WBX0_RAT	B1WBX0_RAT Protein Fam57b OS=Rattus norvegicus (Rat) GN=Fam57b PE=2 SV=1	Fam57b	293493	Protein Fam57b	5.33547	0.0590631	5.36849	0.109461	5.21583	0.0377975	1.02315	1.02315	0.920419	0.920419	0.899596	0.899596	0.0240745	0.392381	0.366322	0.937	0.5317	0.3653
10710936	Doc2a	NM_022937	P70611	DOC2A_RAT	DOC2A_RAT Double C2-like domain-containing protein alpha OS=Rattus norvegicus (Rat) GN=Doc2a PE=1 SV=1	Doc2a	65031	Double C2-like domain-containing protein alpha	4.56513	0.0385543	4.49896	0.0688774	4.53679	0.0365438	0.955166	0.955166	0.980546	0.980546	1.02657	1.02657	0.749889	0.660124	0.667304	0.6461	0.9283	0.848
10710947	Hirip3	NM_001025725	Q4KLN1	Q4KLN1_RAT	Q4KLN1_RAT HIRA interacting protein 3 OS=Rattus norvegicus (Rat) GN=Hirip3 PE=2 SV=1	Hirip3	361650	HIRA interacting protein 3	7.87336	0.0887337	8.03926	0.111139	8.32045	0.172121	1.12187	1.12187	1.36329	1.36329	1.21519	1.21519	0.279349	0.68365	0.124278	0.6414	0.1113	0.3556
10710958	Kctd13	NM_198736	Q7TQ24	Q7TQ24_RAT	Q7TQ24_RAT PDIP1 OS=Rattus norvegicus (Rat) GN=Kctd13 PE=2 SV=1	Kctd13	293497	PDIP1	6.29604	0.0288072	6.42617	0.0760639	6.9713	0.155228	1.09439	1.09439	1.59688	1.59688	1.45915	1.45915	0.0901798	0.149599	0.00716981	0.6674	0.0078	0.0203
10710965	Sez6l2	NM_001107550	D4A6P1	D4A6P1_RAT	D4A6P1_RAT Protein Sez6l2 OS=Rattus norvegicus (Rat) GN=Sez6l2 PE=4 SV=1	Sez6l2	308988	Protein Sez6l2	4.85432	0.0697359	4.85566	0.114675	4.69839	0.0741304	1.00092	1.00092	0.897552	0.897552	0.896724	0.896724	0.638663	0.765737	0.40552	0.9996	0.4734	0.46
10710985	Cdipt	NM_138899	P70500	CDIPT_RAT	CDIPT_RAT CDP-diacylglycerol--inositol 3-phosphatidyltransferase OS=Rattus norvegicus (Rat) GN=Cdipt PE=1 SV=1	Cdipt	192260	CDP-diacylglycerol--inositol 3-phosphatidyltransferase	7.70184	0.01617	7.9337	0.111408	7.52112	0.117811	1.17435	1.17435	0.882264	0.882264	0.751277	0.751277	0.314769	0.120669	0.0557965	0.258	0.4272	0.0478
10710993	---	BC091216	Q5BK39	CP054_RAT	CP054_RAT Transmembrane protein C16orf54 homolog OS=Rattus norvegicus (Rat) PE=1 SV=1	---	308990	Transmembrane protein C16orf54 homolog	4.62516	0.0911535	4.51178	0.055447	4.54733	0.0231443	0.924418	0.924418	0.947478	0.947478	1.02495	1.02495	0.0351187	0.293457	0.472732	0.4559	0.68	0.9114
10710997	Mylpf	NM_012605	P04466	MLRS_RAT	MLRS_RAT Myosin regulatory light chain 2, skeletal muscle isoform OS=Rattus norvegicus (Rat) GN=Mylpf PE=1 SV=2	Mylpf	24584	Myosin regulatory light chain 2, skeletal muscle isoform	13.5754	0.0130573	13.4915	0.0148092	13.2432	0.0221098	0.943477	0.943477	0.794288	0.794288	0.841872	0.841872	0.0942007	0.763802	3.60874e-05	0.0368	0	0.0002
10711004	Zfp771	ENSRNOT00000023999	F1M1R7	F1M1R7_RAT	F1M1R7_RAT Protein Zfp771 OS=Rattus norvegicus (Rat) GN=Zfp771 PE=4 SV=3	Zfp771	308992	Protein Zfp771	6.91589	0.0270561	7.18994	0.0851983	7.37521	0.0713618	1.2092	1.2092	1.37489	1.37489	1.13702	1.13702	0.5641	0.401906	0.00822372	0.0619	0.0069	0.2073
10711017	Itgal	NM_001033998	Q3T1L6	Q3T1L6_RAT	Q3T1L6_RAT Integrin alpha L OS=Rattus norvegicus (Rat) GN=Itgal PE=2 SV=1	Itgal	308995	Integrin alpha L	5.38142	0.0973316	5.10628	0.0214215	5.00104	0.144765	0.826372	0.826372	0.768233	0.768233	0.929645	0.929645	0.328182	0.145934	0.0919242	0.2197	0.0884	0.763
10711051	---	ENSRNOT00000055005	---	---	---	---	---	---	5.83033	0.0484585	5.8469	0.0676008	5.7136	0.0855347	1.01155		0.922273		0.911745		0.915035	0.752499	0.376255	0.977	0.4947	0.3953
10711053	Fbrs	ENSRNOT00000055003	D3ZWF2	D3ZWF2_RAT	D3ZWF2_RAT Protein Fbrs OS=Rattus norvegicus (Rat) GN=Fbrs PE=4 SV=2	Fbrs	691899	Protein Fbrs	7.4173	0.0807982	7.85227	0.0253439	7.9965	0.0524821	1.35188	1.35188	1.49402	1.49402	1.10514	1.10514	0.332848	0.405692	0.000954183	0.0042	0.0009	0.2608
10711085	---	XM_001080255	---	---	---	---	---	---	6.39761	0.0565604	7.00904	0.123364	7.24825	0.0952523	1.52777		1.8033		1.18035		0.380586	0.656216	0.00193689	0.0095	0.0018	0.2571
10711087	---	ENSRNOT00000025261	---	---	---	---	---	---	8.79241	0.0375268	8.83289	0.006471	8.86506	0.0536471	1.02846		1.05165		1.02255		0.774823	0.0998559	0.465545	0.7114	0.4418	0.8749
10711125	---	ENSRNOT00000053325	---	---	---	---	---	---	7.05005	0.128537	7.30585	0.066079	7.31866	0.0808661	1.19399		1.20464		1.00892		0.284831	0.658885	0.166358	0.2314	0.1986	0.9918
10711127	Phkg2	NM_080584	P31325	PHKG2_RAT	PHKG2_RAT Phosphorylase b kinase gamma catalytic chain, liver/testis isoform OS=Rattus norvegicus (Rat) GN=Phkg2 PE=1 SV=1	Phkg2	140671	Phosphorylase b kinase gamma catalytic chain, liver/testis isoform	7.10017	0.0243258	7.02343	0.131154	7.01918	0.0597112	0.948198	0.948198	0.945411	0.945411	0.997061	0.997061	0.898406	0.170785	0.754563	0.8066	0.777	0.9983
10711139	Rnf40	NM_153471	Q8CJB9	BRE1B_RAT	BRE1B_RAT E3 ubiquitin-protein ligase BRE1B OS=Rattus norvegicus (Rat) GN=Rnf40 PE=1 SV=1	Rnf40	266712	E3 ubiquitin-protein ligase BRE1B	7.93482	0.0628853	8.04787	0.0809599	8.33643	0.0409712	1.08152	1.08152	1.32098	1.32098	1.22142	1.22142	0.430984	0.68524	0.0106018	0.4521	0.0099	0.0427
10711159	---	ENSRNOT00000054080	---	---	---	---	---	---	3.70056	0.135999	3.59367	0.0355161	3.51628	0.0273784	0.928588		0.880093		0.947776		0.000881792	0.0837989	0.355396	0.654	0.3294	0.7969
10711161	---	ENSRNOT00000062140	---	---	---	---	---	---	7.92758	0.0250166	7.54634	0.0826285	7.20351	0.0680573	0.767777		0.605387		0.788493		0.398375	0.356019	0.000614843	0.0132	0.0005	0.0207
10711163	Ctf1	NM_017129	Q63086	CTF1_RAT	CTF1_RAT Cardiotrophin-1 OS=Rattus norvegicus (Rat) GN=Ctf1 PE=2 SV=1	Ctf1	29201	Cardiotrophin-1	6.87114	0.134348	7.06707	0.0543156	6.85575	0.0438874	1.14546	1.14546	0.989385	0.989385	0.863747	0.863747	0.779113	0.314402	0.241101	0.3176	0.9936	0.2788
10711167	Fbxl19	NM_001107552	D4A2L9	D4A2L9_RAT	D4A2L9_RAT F-box and leucine-rich repeat protein 19 (Predicted), isoform CRA_a OS=Rattus norvegicus (Rat) GN=Fbxl19 PE=4 SV=1	Fbxl19	308999	F-box and leucine-rich repeat protein 19 (Predicted), isoform CRA_a	6.18983	0.00795765	6.12942	0.032829	5.88668	0.0824305	0.958989	0.958989	0.810477	0.810477	0.845137	0.845137	0.0520117	0.0593002	0.012418	0.7205	0.0134	0.0332
10711181	Orai3	NM_001014024	B2ZDQ0	B2ZDQ0_RAT	B2ZDQ0_RAT Calcium release-activated calcium modulator 3 protein OS=Rattus norvegicus (Rat) GN=Orai3 PE=2 SV=1	Orai3	309000	Calcium release-activated calcium modulator 3 protein	6.86962	0.053416	7.28421	0.071609	7.44146	0.0393468	1.33292	1.33292	1.48641	1.48641	1.11515	1.11515	0.233018	0.709699	0.000972218	0.0049	0.0009	0.2048
10711210	Hsd3b7	NM_139329	O35048	3BHS7_RAT	3BHS7_RAT 3 beta-hydroxysteroid dehydrogenase type 7 OS=Rattus norvegicus (Rat) GN=Hsd3b7 PE=2 SV=1	Hsd3b7	246211	3 beta-hydroxysteroid dehydrogenase type 7	6.68809	0.0382697	6.67033	0.0635986	6.51124	0.0622155	0.987765	0.987765	0.884633	0.884633	0.89559	0.89559	0.836603	0.782948	0.119016	0.9755	0.1396	0.183
10711219	Stx4	NM_031125	Q08850	STX4_RAT	STX4_RAT Syntaxin-4 OS=Rattus norvegicus (Rat) GN=Stx4 PE=1 SV=1	Stx4	81803	Syntaxin-4	9.78899	0.0783929	9.72124	0.0842277	9.50848	0.0959524	0.954125	0.954125	0.823301	0.823301	0.862886	0.862886	0.295912	0.97046	0.136549	0.8543	0.1359	0.2688
10711231	Zfp646	ENSRNOT00000036187	A0A0G2KA68	A0A0G2KA68_RAT	A0A0G2KA68_RAT Protein Zfp646 OS=Rattus norvegicus (Rat) GN=Zfp646 PE=4 SV=1	Zfp646	309003	Protein Zfp646	6.96916	0.0424758	7.28998	0.0205031	7.75135	0.0911607	1.24904	1.24904	1.71974	1.71974	1.37685	1.37685	0.48952	0.190396	0.000246591	0.0199	0.0002	0.0034
10711234	Bckdk	NM_019244	Q00972	BCKD_RAT	BCKD_RAT [3-methyl-2-oxobutanoate dehydrogenase [lipoamide]] kinase, mitochondrial OS=Rattus norvegicus (Rat) GN=Bckdk PE=1 SV=2	Bckdk	29603	[3-methyl-2-oxobutanoate dehydrogenase [lipoamide]] kinase, mitochondrial	10.761	0.0494398	10.6103	0.123511	9.85834	0.0245556	0.900842	0.900842	0.534903	0.534903	0.593781	0.593781	0.0405932	0.173705	0.000359186	0.3991	0.0004	0.0011
10711245	Kat8	NM_001017378	Q5XI06	KAT8_RAT	KAT8_RAT Histone acetyltransferase KAT8 OS=Rattus norvegicus (Rat) GN=Kat8 PE=1 SV=1	Kat8	310194	Histone acetyltransferase KAT8	9.55307	0.0488167	9.89153	0.00747205	10.2103	0.0675916	1.2644	1.2644	1.57703	1.57703	1.24725	1.24725	0.681917	0.070764	0.000193612	0.0052	0.0002	0.0074
10711251	Fus	NM_001012137	Q5PQK2	Q5PQK2_RAT	Q5PQK2_RAT Fusion, derived from t(1216) malignant liposarcoma (Human) OS=Rattus norvegicus (Rat) GN=Fus PE=1 SV=1	Fus	317385	Fusion, derived from t(1216) malignant liposarcoma (Human)	9.69597	0.03414	9.76853	0.0108035	10.1603	0.0316661	1.05158	1.15089	1.37967	1.589	1.312	1.37522	0.021146	0.344925	4.02115e-05	0.1986	0	0.0001
10711260	Trim72	NM_001077675	A0JPQ4	TRI72_RAT	TRI72_RAT Tripartite motif-containing protein 72 OS=Rattus norvegicus (Rat) GN=Trim72 PE=1 SV=1	Trim72	365377	Tripartite motif-containing protein 72	10.1026	0.0967357	8.75768	0.07309	7.5987	0.111397	0.393677	0.393677	0.176301	0.176301	0.447831	0.447831	0.220305	0.866332	4.67298e-06	0.0001	0	0.0003
10711268	Itgam	NM_012711	Q9JI30	Q9JI30_RAT	Q9JI30_RAT Integrin beta 2 alpha subunit OS=Rattus norvegicus (Rat) GN=Itgam PE=2 SV=1	Itgam	25021	Integrin beta 2 alpha subunit	5.14518	0.12316	4.97097	0.0717622	4.95041	0.162212	0.886256	0.886256	0.873711	0.873711	0.985845	0.985845	0.898391	0.616709	0.512074	0.6103	0.5371	0.9903
10711299	Itgax	ENSRNOT00000054983	D3ZWZ1	D3ZWZ1_RAT	D3ZWZ1_RAT Integrin alpha-D OS=Rattus norvegicus (Rat) GN=Itgax PE=1 SV=3	Itgax	499271	Integrin alpha-D	4.84448	0.162006	4.66564	0.047206	4.63106	0.0606604	0.883409	0.883409	0.862489	0.862489	0.97632	0.97632	0.0322407	0.237304	0.343935	0.466	0.3609	0.9717
10711328	Itgad	NM_031691	Q9QYE7	ITAD_RAT	ITAD_RAT Integrin alpha-D OS=Rattus norvegicus (Rat) GN=Itgad PE=2 SV=1	Itgad	64350	Integrin alpha-D	5.00424	0.0416843	4.99189	0.075243	4.83801	0.0454314	0.991473	0.991473	0.891169	0.891169	0.898834	0.898834	0.830918	0.730561	0.146338	0.9916	0.1768	0.2068
10711357	Armc5	NM_001009455	Q5PQP9	ARMC5_RAT	ARMC5_RAT Armadillo repeat-containing protein 5 OS=Rattus norvegicus (Rat) GN=Armc5 PE=2 SV=1	Armc5	361653	Armadillo repeat-containing protein 5	7.21108	0.102739	7.21489	0.0144111	7.13161	0.0397206	1.00265	1.00265	0.946407	0.946407	0.94391	0.94391	0.211865	0.0815981	0.583452	0.9993	0.6475	0.6267
10711364	---	ENSRNOT00000027139	---	---	---	---	---	---	6.06157	0.0527741	5.9564	0.114934	5.56372	0.121969	0.929696		0.708163		0.761715		0.316404	0.567563	0.0277917	0.7433	0.0287	0.072
10711377	Slc5a2	NM_022590	F1LMI6	F1LMI6_RAT	F1LMI6_RAT Sodium/glucose cotransporter 2 OS=Rattus norvegicus (Rat) GN=Slc5a2 PE=3 SV=1	Slc5a2	64522	Sodium/glucose cotransporter 2	5.84468	0.0161879	5.92089	0.0497752	5.7075	0.0238349	1.05424	1.05424	0.909294	0.909294	0.862509	0.862509	0.824081	0.378635	0.0124428	0.3227	0.0681	0.0108
10711396	Ahsp	NM_001106299	A9UMW3	A9UMW3_RAT	A9UMW3_RAT Erythroid associated factor OS=Rattus norvegicus (Rat) GN=Ahsp PE=1 SV=1	Ahsp	293522	Erythroid associated factor	2.97551	0.0312868	2.97262	0.064711	3.0101	0.00389113	0.997999	0.997999	1.02426	1.02426	1.02631	1.02631	0.402559	0.0522178	0.79994	0.9983	0.8456	0.8173
10711399	---	ENSRNOT00000031920	---	---	---	---	---	---	4.46859	0.117148	4.3154	0.0159123	4.13761	0.161869	0.899257		0.794998		0.884062		0.0125714	0.0729839	0.212722	0.6522	0.1905	0.5503
10711401	Bag3	NM_001011936	Q5U2U8	Q5U2U8_RAT	Q5U2U8_RAT Bcl2-associated athanogene 3 OS=Rattus norvegicus (Rat) GN=Bag3 PE=1 SV=1	Bag3	293524	Bcl2-associated athanogene 3	9.35733	0.087514	9.54325	0.100935	9.94614	0.130449	1.13754	1.13754	1.50401	1.50401	1.32215	1.32215	0.645428	0.874169	0.0212286	0.4787	0.0193	0.0853
10711410	Inpp5f	ENSRNOT00000027630	D3ZKG7	D3ZKG7_RAT	D3ZKG7_RAT Inositol polyphosphate-5-phosphatase F (Predicted), isoform CRA_c OS=Rattus norvegicus (Rat) GN=Inpp5f PE=1 SV=1	Inpp5f	309008	Inositol polyphosphate-5-phosphatase F (Predicted), isoform CRA_c	6.62658	0.0485129	6.6301	0.308637	6.88227	0.124989	1.00245	1.00245	1.19391	1.19391	1.19099	1.19099	0.138774	0.108098	0.60546	1	0.6571	0.6571
10711431	---	GENSCAN00000026115	---	---	---	---	---	---	3.79491	0.064691	3.72652	0.0534273	3.6709	0.053589	0.953705		0.917634		0.962178		0.523421	0.979286	0.383409	0.7102	0.3549	0.7779
10711433	Sec23ip	BC098824	Q4KM40	Q4KM40_RAT	Q4KM40_RAT Sec23ip protein OS=Rattus norvegicus (Rat) GN=Sec23ip PE=2 SV=1	Sec23ip	309010	Sec23ip protein	8.76983	0.0107949	8.99239	0.116614	10.4653	0.0340646	1.1668	1.1668	3.23879	3.23879	2.77579	2.77579	0.00385671	0.0332529	5.34316e-06	0.1451	0	0
10711454	Ppapdc1a	ENSRNOT00000027681	F1LZ94	F1LZ94_RAT	F1LZ94_RAT Protein Ppapdc1a OS=Rattus norvegicus (Rat) GN=Ppapdc1a PE=4 SV=2	Ppapdc1a	309014	Protein Ppapdc1a	4.44571	0.0319051	4.4448	0	4.49893	0.069573	0.999365	0.999365	1.03758	1.03758	1.03824	1.03824	0.00221626	0	0.636533	0.9985	0.7008	0.6714
10711463	Wdr11	ENSRNOT00000027704	D3Z9L5	D3Z9L5_RAT	D3Z9L5_RAT Protein Wdr11 OS=Rattus norvegicus (Rat) GN=Wdr11 PE=1 SV=2	Wdr11	309016	Protein Wdr11	7.03323	0.0255984	7.01369	0.155739	7.2681	0.108593	0.98655	0.98655	1.1768	1.1768	1.19285	1.19285	0.627921	0.170032	0.275093	0.9911	0.3606	0.3103
10711496	Ska2	BC088264	Q5I0J4	SKA2_RAT	SKA2_RAT Spindle and kinetochore-associated protein 2 OS=Rattus norvegicus (Rat) GN=Ska2 PE=2 SV=1	Ska2	287598	Spindle and kinetochore-associated protein 2	5.48408	0.176487	5.29471	0.0585878	5.15528	0.197546	0.876992	0.90494	0.796199	0.803197	0.907875	0.888177	0.746164	0.358575	0.388145	0.6852	0.3612	0.8095
10711498	---	ENSRNOT00000042763	---	---	---	---	---	---	6.74713	0.0731353	6.52246	0.231101	6.05058	0.130096	0.85579		0.617045		0.721024		0.665697	0.381316	0.0534243	0.6095	0.0489	0.1707
10711501	---	ENSRNOT00000032830	---	---	---	---	---	---	3.7144	0.0252524	3.74162	0.0337415	3.7276	0	1.01905		1.00919		0.99033		0.10808	0	0.756335	0.7363	0.9235	0.9235
10711504	Tacc2	NM_001004415	D3ZXK3	D3ZXK3_RAT	D3ZXK3_RAT Protein Tacc2 OS=Rattus norvegicus (Rat) GN=Tacc2 PE=1 SV=1	Tacc2	309025	Protein Tacc2	9.69296	0.0414128	10.3877	0.0172454	10.1719	0.0315194	1.61864	1.61864	1.39368	1.39368	0.861017	0.861017	0.120572	0.56775	1.121e-05	0	0.0001	0.006
10711532	Btbd16	NM_001017464	Q6AXU1	BTBDG_RAT	BTBDG_RAT BTB/POZ domain-containing protein 16 OS=Rattus norvegicus (Rat) GN=Btbd16 PE=2 SV=1	Btbd16	361658	BTB/POZ domain-containing protein 16	4.57928	0.0166468	4.53198	0.0709617	4.61418	0.0259737	0.967741	0.967741	1.02448	1.02448	1.05863	1.05863	0.0118601	0.152108	0.473065	0.7567	0.8392	0.4449
10711549	Plekha1	NM_001079894	A1A5P7	A1A5P7_RAT	A1A5P7_RAT Pleckstrin homology domain containing, family A (Phosphoinositide binding specific) member 1 OS=Rattus norvegicus (Rat) GN=Plekha1 PE=2 SV=1	Plekha1	361659	Pleckstrin homology domain containing, family A (Phosphoinositide binding specific) member 1	7.90835	0.009589	7.83052	0.123353	8.91788	0.0982057	0.947478	0.947478	2.01325	2.01325	2.12485	2.12485	0.033827	0.0626136	0.000263096	0.8286	0.0006	0.0004
10711566	Htra1	NM_031721	Q9QZK5	HTRA1_RAT	HTRA1_RAT Serine protease HTRA1 OS=Rattus norvegicus (Rat) GN=Htra1 PE=2 SV=1	Htra1	65164	Serine protease HTRA1	8.76502	0.044072	8.13652	0.111976	7.26261	0.0901227	0.646846	0.646846	0.352962	0.352962	0.545666	0.545666	0.246885	0.533992	5.65944e-05	0.0053	0	0.001
10711575	Dmbt1	AF540887	Q8CIZ5	DMBT1_RAT	DMBT1_RAT Deleted in malignant brain tumors 1 protein OS=Rattus norvegicus (Rat) GN=Dmbt1 PE=1 SV=1	Dmbt1	170568	Deleted in malignant brain tumors 1 protein	5.09506	0.0580405	5.54651	0.127605	5.40099	0.148343	1.36741	1.36741	1.23622	1.23622	0.904057	0.904057	0.630677	0.514661	0.0862397	0.0793	0.2419	0.6715
10711608	---	XM_219319	---	---	---	---	---	---	5.34841	0.057294	5.37983	0.0644897	5.22319	0.0377247	1.02202		0.916865		0.89711		0.25073	0.799517	0.185904	0.9051	0.3207	0.189
10711647	---	ENSRNOT00000054906	---	---	---	---	---	---	3.96836	0.0771329	4.08252	0.0163707	4.08484	0.043841	1.08235		1.08409		1.0016		0.23073	0.218521	0.281503	0.3313	0.3491	0.9989
10711651	RGD1559891	ENSRNOT00000036657	D4A298	D4A298_RAT	D4A298_RAT Uncharacterized protein OS=Rattus norvegicus (Rat) GN=RGD1559891 PE=4 SV=2	RGD1559891	309028	Uncharacterized protein	3.57389	0.0554779	3.46707	0.0396867	3.48985	0.0547576	0.928631	0.928631	0.943413	0.943413	1.01592	1.01592	0.185208	0.906645	0.37338	0.374	0.5337	0.9427
10711653	Fam24a	BC166439	B1WBS9	FA24A_RAT	FA24A_RAT Protein FAM24A OS=Rattus norvegicus (Rat) GN=Fam24a PE=3 SV=1	Fam24a	499278	Protein FAM24A	4.35702	0.0403045	4.4256	0.0393499	4.2795	0.0794675	1.04869	1.04869	0.947689	0.947689	0.903689	0.903689	0.153139	0.556434	0.262789	0.6739	0.6266	0.2374
10711657	Pstk	ENSRNOT00000027967	D3ZE35	D3ZE35_RAT	D3ZE35_RAT Protein Pstk OS=Rattus norvegicus (Rat) GN=Pstk PE=4 SV=3	Pstk	361661	Protein Pstk	9.36073	0.0421787	8.7652	0.115157	6.97156	0.18963	0.661804	0.661804	0.190893	0.190893	0.288443	0.288443	0.0687304	0.248	3.25633e-05	0.0406	0	0.0002		Aminoacyl-tRNA biosynthesis
10711664	Acadsb	NM_013084	P70584	ACDSB_RAT	ACDSB_RAT Short/branched chain specific acyl-CoA dehydrogenase, mitochondrial OS=Rattus norvegicus (Rat) GN=Acadsb PE=1 SV=1	Acadsb	25618	Short/branched chain specific acyl-CoA dehydrogenase, mitochondrial	10.1139	0.333324	10.1949	0.135403	11.0644	0.285625	1.05779	1.05779	1.93263	1.93263	1.82704	1.82704	0.392245	0.551032	0.080601	0.9755	0.098	0.1285
10711676	Hmx3	NM_001106302	D4A585	D4A585_RAT	D4A585_RAT Protein Hmx3 OS=Rattus norvegicus (Rat) GN=Hmx3 PE=4 SV=1	Hmx3	293537	Protein Hmx3	5.50145	0.0774287	5.3649	0.0540303	5.30014	0.0216207	0.90969	0.90969	0.869759	0.869759	0.956105	0.956105	0.04639	0.315709	0.10563	0.2702	0.0981	0.7159
10711683	Hmx2	NM_001106303	D4A578	D4A578_RAT	D4A578_RAT Protein Hmx2 OS=Rattus norvegicus (Rat) GN=Hmx2 PE=4 SV=1	Hmx2	293538	Protein Hmx2	6.77696	0.0715952	6.62654	0.0122677	6.63919	0.000377667	0.900991	0.900991	0.908923	0.908923	1.0088	1.0088	0.000534815	0	0.0809703	0.0977	0.1303	0.9725
10711686	Bub3	NM_001047906	Q4FZS2	Q4FZS2_RAT	Q4FZS2_RAT Budding uninhibited by benzimidazoles 3 homolog (S. cerevisiae) OS=Rattus norvegicus (Rat) GN=Bub3 PE=1 SV=1	Bub3	361662	Budding uninhibited by benzimidazoles 3 homolog (S. cerevisiae)	6.93954	0.0514365	6.98964	0.0186457	7.06101	0.035352	1.03533	1.03533	1.08784	1.08784	1.05071	1.05071	0.710425	0.493406	0.147237	0.5884	0.1299	0.4532
10711703	---	ENSRNOT00000044735	---	---	---	---	---	---	4.22279	0.0794621	4.33604	0.0291669	4.32054	0.0450684	1.08167		1.07011		0.989313		0.472575	0.455763	0.33172	0.3659	0.424	0.9907
10711706	---	XM_001053144	---	---	---	---	---	---	6.89713	0.120005	6.76745	0.019269	6.636	0.0314716	0.914037		0.834434		0.912911		0.0416747	0.058248	0.104769	0.4469	0.0906	0.4469
10711708	---	ENSRNOT00000022273	M0R6D6	M0R6D6_RAT	M0R6D6_RAT Uncharacterized protein OS=Rattus norvegicus (Rat) PE=4 SV=2	---	---	Uncharacterized protein	5.93459	0.0490832	5.80586	0.101751	5.5584	0.112541	0.914637	0.914637	0.770471	0.770471	0.842379	0.842379	0.683109	0.569976	0.0666369	0.6044	0.0602	0.2134
10711711	---	ENSRNOT00000054903	---	---	---	---	---	---	6.11773	0.007385	6.0276	0.16842	6.12511	0	0.939443		1.00513		1.06992		5.36575e-05	0	0.723488	0.7848	0.9971	0.745
10711715	Lhpp	NM_001009706	Q5I0D5	LHPP_RAT	LHPP_RAT Phospholysine phosphohistidine inorganic pyrophosphate phosphatase OS=Rattus norvegicus (Rat) GN=Lhpp PE=2 SV=1	Lhpp	361663	Phospholysine phosphohistidine inorganic pyrophosphate phosphatase	6.58496	0.060783	6.64597	0.0563897	6.68828	0.0980158	1.04319	1.04319	1.07424	1.07424	1.02976	1.02976	0.575877	0.70828	0.643681	0.8438	0.6203	0.9141
10711723	Fam175b	NM_001106307	D4A415	D4A415_RAT	D4A415_RAT Protein Fam175b OS=Rattus norvegicus (Rat) GN=Fam175b PE=1 SV=3	Fam175b	293570	Protein Fam175b	8.32818	0.0981389	8.58974	0.0589891	8.90544	0.106216	1.19877	1.19877	1.49202	1.49202	1.24462	1.24462	0.948566	0.764515	0.0127367	0.1907	0.0105	0.1128
10711733	Zranb1	ENSRNOT00000023257	D4A3I0	D4A3I0_RAT	D4A3I0_RAT Protein Zranb1 OS=Rattus norvegicus (Rat) GN=Zranb1 PE=4 SV=2	Zranb1	100360606	Protein Zranb1	10.2014	0.0128586	10.5864	0.0978312	11.3759	0.138706	1.30584	1.30584	2.25706	2.25706	1.72844	1.72844	0.207226	0.0820935	0.000442428	0.0736	0.0004	0.0033
10711743	Edrf1	NM_001107557	D3ZRW6	D3ZRW6_RAT	D3ZRW6_RAT Protein Edrf1 OS=Rattus norvegicus (Rat) GN=Edrf1 PE=1 SV=1	Edrf1	309069	Protein Edrf1	7.07215	0.0475092	7.40139	0.105742	8.18288	0.0171429	1.25636	1.25636	2.15956	2.15956	1.71891	1.71891	0.0600385	0.130101	6.33611e-05	0.0308	0.0001	0.0004
10711769	Bccip	NM_001108505	D3ZB65	D3ZB65_RAT	D3ZB65_RAT Protein Bccip OS=Rattus norvegicus (Rat) GN=Bccip PE=1 SV=2	Bccip	361666	Protein Bccip	9.67713	0.0763406	9.39143	0.101609	9.3327	0.0729064	0.820347	0.820347	0.787619	0.787619	0.960104	0.960104	0.728987	0.870155	0.0594947	0.1213	0.0643	0.8736
10711777	Fank1	NM_001008347	Q66H07	FANK1_RAT	FANK1_RAT Fibronectin type 3 and ankyrin repeat domains 1 protein OS=Rattus norvegicus (Rat) GN=Fank1 PE=2 SV=1	Fank1	309071	Fibronectin type 3 and ankyrin repeat domains 1 protein	3.41713	0.0662389	3.51064	0.0113067	3.56788	0.0754299	1.06696	1.06696	1.11015	1.11015	1.04048	1.04048	0.0490952	0.106447	0.246724	0.5265	0.2261	0.7541
10711789	---	ENSRNOT00000052809	---	---	---	---	---	---	3.07087	0.0330197	3.0853	0.0343791	3.02026	0.0160182	1.01005		0.965526		0.955915		0.125665	0.687912	0.29231	0.9425	0.4366	0.2984
10711791	Dock1	ENSRNOT00000054897	D3ZZW1	D3ZZW1_RAT	D3ZZW1_RAT Protein Dock1 OS=Rattus norvegicus (Rat) GN=Dock1 PE=1 SV=1	Dock1	309081	Protein Dock1	8.29059	0.0359732	8.16433	0.265573	7.97692	0.137459	0.9162	0.9162	0.80459	0.80459	0.878182	0.878182	0.333121	0.110108	0.473511	0.8589	0.4472	0.7369
10711844	Nps	ENSRNOT00000054896	P0C0P7	NPS_RAT	NPS_RAT Neuropeptide S OS=Rattus norvegicus (Rat) GN=Nps PE=2 SV=1	Nps	100360071	Neuropeptide S	3.52768	0.0783561	3.42938	0.0028163	3.35949	0.0573798	0.934133	0.934133	0.88996	0.88996	0.952712	0.952712	0.142735	0.0175666	0.190148	0.4674	0.1718	0.6959
10711847	Foxi2	L13205	Q63248	FOXI2_RAT	FOXI2_RAT Forkhead box protein I2 OS=Rattus norvegicus (Rat) GN=Foxi2 PE=2 SV=1	Foxi2	246073	Forkhead box protein I2	5.86606	0.0848951	5.76227	0.068419	5.72529	0.0568563	0.930589	0.930589	0.907039	0.907039	0.974693	0.974693	0.297843	0.862041	0.401765	0.5924	0.3921	0.9188
10711852	Ptpre	BC166573	B2GV87	PTPRE_RAT	PTPRE_RAT Receptor-type tyrosine-protein phosphatase epsilon OS=Rattus norvegicus (Rat) GN=Ptpre PE=2 SV=1	Ptpre	114767	Receptor-type tyrosine-protein phosphatase epsilon	6.16031	0.0466032	6.19263	0.0897336	5.96609	0.147591	1.02266	1.02266	0.87405	0.87405	0.854684	0.854684	0.0600194	0.369211	0.317843	0.972	0.4358	0.3363
10711875	Mgmt	NM_012861	P24528	MGMT_RAT	MGMT_RAT Methylated-DNA--protein-cysteine methyltransferase OS=Rattus norvegicus (Rat) GN=Mgmt PE=1 SV=3	Mgmt	25332	Methylated-DNA--protein-cysteine methyltransferase	5.18298	0.131174	5.3182	0.0740766	5.19617	0.0269195	1.09826	1.09826	1.00918	1.00918	0.918889	0.918889	0.473102	0.1992	0.529158	0.553	0.9903	0.627
10711881	Glrx3	NM_032614	Q9JLZ1	GLRX3_RAT	GLRX3_RAT Glutaredoxin-3 OS=Rattus norvegicus (Rat) GN=Glrx3 PE=1 SV=2	Glrx3	58815	Glutaredoxin-3	8.47444	0.0891695	8.3079	0.126598	8.13391	0.096723	0.890977	0.890977	0.789752	0.789752	0.886389	0.886389	0.907906	0.894269	0.147285	0.5355	0.1292	0.4999
10711894	Ppp2r2d	NM_144746	A0A0G2JSQ0	A0A0G2JSQ0_RAT	A0A0G2JSQ0_RAT Serine/threonine-protein phosphatase 2A 55 kDa regulatory subunit B OS=Rattus norvegicus (Rat) GN=Ppp2r2d PE=1 SV=1	Ppp2r2d	246255	Serine/threonine-protein phosphatase 2A 55 kDa regulatory subunit B	8.7494	0.0288899	8.55734	0.102185	8.60632	0.0581679	0.875352	0.875352	0.905582	0.905582	1.03453	1.03453	0.379829	0.338184	0.208411	0.2068	0.3657	0.8878
10711906	---	ENSRNOT00000023557	---	---	---	---	---	---	4.09382	0.0185547	4.02846	0.030235	4.08174	0.00648167	0.955712		0.991667		1.03762		0.0231792	0.0756143	0.121652	0.1259	0.8888	0.2276
10711928	Dpysl4	NM_012933	F1LNT0	F1LNT0_RAT	F1LNT0_RAT Dihydropyrimidinase-related protein 4 OS=Rattus norvegicus (Rat) GN=Dpysl4 PE=4 SV=1	Dpysl4	25417	Dihydropyrimidinase-related protein 4	4.71309	0.128154	4.66151	0.118853	4.50537	0.0344121	0.96488	0.96488	0.865905	0.865905	0.897423	0.897423	0.0244963	0.290159	0.380849	0.9287	0.3758	0.5576
10711944	Lrrc27	NM_001113789	B0BN00	B0BN00_RAT	B0BN00_RAT Lrrc27 protein OS=Rattus norvegicus (Rat) GN=Lrrc27 PE=2 SV=1	Lrrc27	499281	Lrrc27 protein	4.88779	0.0540219	4.88521	0	4.99341	0.104836	0.998213	0.998213	1.07596	1.07596	1.07788	1.07788	0.0346316	0	0.501895	1	0.5602	0.5602
10711957	Pwwp2b	NM_001108507	B1WC60	B1WC60_RAT	B1WC60_RAT PWWP domain containing 2 (Predicted) OS=Rattus norvegicus (Rat) GN=Pwwp2b PE=2 SV=1	Pwwp2b	361671	PWWP domain containing 2 (Predicted)	7.01055	0.0205574	6.90958	0.0808753	6.14459	0.135995	0.932408	0.932408	0.548682	0.548682	0.588457	0.588457	0.041542	0.15468	0.00110473	0.737	0.0014	0.0027
10711961	Inpp5a	NM_001108923	D3ZZX1	D3ZZX1_RAT	D3ZZX1_RAT Inositol polyphosphate-5-phosphatase A (Predicted), isoform CRA_a OS=Rattus norvegicus (Rat) GN=Inpp5a PE=1 SV=1	Inpp5a	365382	Inositol polyphosphate-5-phosphatase A (Predicted), isoform CRA_a	8.3861	0.0391016	8.18831	0.00451	8.12108	0.0570918	0.871886	0.871886	0.832191	0.832191	0.954473	0.954473	0.210483	0.0308172	0.00712457	0.0259	0.007	0.4927
10711979	Adgra1	NM_001107559	A0A0G2K4I3	A0A0G2K4I3_RAT	A0A0G2K4I3_RAT Protein Adgra1 OS=Rattus norvegicus (Rat) GN=Adgra1 PE=4 SV=1	Adgra1	309097	Protein Adgra1	4.65021	0.0295112	4.59844	0.0176576	4.52479	0.0769142	0.964753	0.964753	0.916738	0.916738	0.95023	0.95023	0.00989033	0.161372	0.27989	0.7626	0.2569	0.5741
10711987	Kndc1	ENSRNOT00000034426	D4A8Q2	D4A8Q2_RAT	D4A8Q2_RAT Protein Kndc1 OS=Rattus norvegicus (Rat) GN=Kndc1 PE=1 SV=3	Kndc1	361672	Protein Kndc1	6.011	0.10898	5.81014	0.0701598	5.93406	0.034846	0.870028	0.870028	0.948062	0.948062	1.08969	1.08969	0.150526	0.371593	0.260745	0.2402	0.7725	0.5346
10711995	---	ENSRNOT00000046022	---	---	---	---	---	---	4.69995	0.0612282	4.86524	0.0621247	4.9494	0.146283	1.12139		1.18875		1.06007		0.0455363	0.419072	0.274453	0.5109	0.258	0.8268
10711997	Zfp511	NM_001106309	D4AAR5	D4AAR5_RAT	D4AAR5_RAT Protein Zfp511 OS=Rattus norvegicus (Rat) GN=Zfp511 PE=1 SV=1	Zfp511	293586	Protein Zfp511	6.72256	0.0882882	7.18078	0.0838453	7.75619	0.136145	1.37384	1.37384	2.04717	2.04717	1.4901	1.4901	0.761668	0.776404	0.00148009	0.0536	0.0012	0.0209
10712004	Prap1	NM_031669	Q9ES75	PRAP1_RAT	PRAP1_RAT Proline-rich acidic protein 1 OS=Rattus norvegicus (Rat) GN=Prap1 PE=2 SV=1	Prap1	60574	Proline-rich acidic protein 1	5.54104	0.0693667	5.71129	0.120067	5.79268	0.0757338	1.12526	1.12526	1.19057	1.19057	1.05804	1.05804	0.280566	0.756123	0.216748	0.4382	0.2031	0.8022
10712011	Paox	NM_001106311	D3Z8W0	D3Z8W0_RAT	D3Z8W0_RAT Protein Paox OS=Rattus norvegicus (Rat) GN=Paox PE=1 SV=1	Paox	293589	Protein Paox	6.7276	0.0367168	7.06539	0.0738989	6.76579	0.0277691	1.26382	1.26382	1.02682	1.02682	0.812476	0.812476	0.196506	0.452791	0.00625067	0.0077	0.8235	0.0145
10712020	Paox	AF329824	Q99MM5	Q99MM5_RAT	Q99MM5_RAT Putative GTP-binding protein OS=Rattus norvegicus (Rat) GN=Paox PE=2 SV=1	Paox	293589	Putative GTP-binding protein	9.536	0.0419707	9.54757	0.0746151	9.51483	0.0802258	1.00805	1.00805	0.985438	0.985438	0.977567	0.977567	0.64177	0.737544	0.951733	0.9941	0.9768	0.9488
10712032	Olr287	NM_173334	P23267	OL287_RAT	OL287_RAT Olfactory receptor 287 OS=Rattus norvegicus (Rat) GN=Olr287 PE=2 SV=1	Olr287	287001	Olfactory receptor 287	4.33592	0.0772088	4.50896	0.036923	4.42137	0.0578317	1.12742	1.12742	1.06101	1.06101	0.941094	0.941094	0.156371	0.649225	0.201929	0.1799	0.5662	0.6101
10712034	Cd163l1	NM_001106312	D4AEN2	D4AEN2_RAT	D4AEN2_RAT Protein Cd163l1 OS=Rattus norvegicus (Rat) GN=Cd163l1 PE=4 SV=1	Cd163l1	293591	Protein Cd163l1	5.41338	0.00893135	5.37605	0.0375234	5.33018	0.0777826	0.974455	0.974455	0.943965	0.943965	0.968711	0.968711	0.00280584	0.0770417	0.526634	0.8385	0.4977	0.8141
10712047	---	XR_005909	---	---	---	---	---	---	5.00148	0.0700835	4.98468	0.0276416	5.03584	0.0107157	0.988417		1.0241		1.0361		0.331674	0.105892	0.738257	0.9632	0.8632	0.7253
10712055	Olr289	NM_001000767	D3ZPH1	D3ZPH1_RAT	D3ZPH1_RAT Olfactory receptor OS=Rattus norvegicus (Rat) GN=Olr289 PE=3 SV=1	Olr289	405041	Olfactory receptor	3.16332	0.147639	2.83274	0.0659063	2.9636	0.0272705	0.79522	0.79522	0.870721	0.870721	1.09494	1.09494	0.0917071	0.14669	0.124127	0.1104	0.3689	0.6201
10712057	Olr292	NM_001000232	A0A0G2JTA8	A0A0G2JTA8_RAT	A0A0G2JTA8_RAT Protein Olr292 OS=Rattus norvegicus (Rat) GN=Olr292 PE=4 SV=1	Olr292	293594	Protein Olr292	4.15329	0.108315	4.15192	0.0177903	4.34389	0.242414	0.999049	0.999049	1.14124	1.14124	1.14233	1.14233	0.00519569	0.0318382	0.62697	0.9999	0.6812	0.6724
10712061	Olr300	NM_001000237	M0R6V4	M0R6V4_RAT	M0R6V4_RAT Protein Olr300 OS=Rattus norvegicus (Rat) GN=Olr300 PE=4 SV=1	Olr300	293599	Protein Olr300	3.06074	0.0191015	3.0387	0.023433	3.10202	0.0409457	0.984842	0.984842	1.02903	1.02903	1.04486	1.04486	0.155053	0.551403	0.349473	0.8364	0.6086	0.3278
10712064	Olr302	NM_001000238	D4A501	D4A501_RAT	D4A501_RAT Olfactory receptor OS=Rattus norvegicus (Rat) GN=Olr302 PE=3 SV=1	Olr302	293600	Olfactory receptor	4.51137	0.193364	4.6024	0.0492169	4.64888	0.128888	1.06513	1.06513	1.1	1.1	1.03275	1.03275	0.50047	0.29615	0.78375	0.8977	0.7701	0.9643
10712066	Olr304	NM_001001039	D4A8V3	D4A8V3_RAT	D4A8V3_RAT Olfactory receptor OS=Rattus norvegicus (Rat) GN=Olr304 PE=3 SV=1	Olr304	405925	Olfactory receptor	4.0836	0.099731	4.16772	0.0490317	4.10563	0.013057	1.06004	1.06004	1.01539	1.01539	0.957876	0.957876	0.210318	0.101435	0.637526	0.6303	0.9646	0.7745
10712068	Olr305	NM_001000240	D3ZJB4	D3ZJB4_RAT	D3ZJB4_RAT Protein Olr305 OS=Rattus norvegicus (Rat) GN=Olr305 PE=4 SV=1	Olr305	293603	Protein Olr305	3.61808	0.0134861	3.70035	0.0501662	3.67801	0.040206	1.05868	1.05868	1.04242	1.04242	0.984636	0.984636	0.0202112	0.354736	0.337962	0.3358	0.5074	0.9276
10712070	Olr306	NM_001000766	D3ZAZ6	D3ZAZ6_RAT	D3ZAZ6_RAT Olfactory receptor OS=Rattus norvegicus (Rat) GN=Olr306 PE=3 SV=1	Olr306	405040	Olfactory receptor	3.55843	0.0372465	3.65121	0.021163	3.77475	0.142079	1.06642	1.06642	1.16177	1.16177	1.08941	1.08941	0.0479143	0.0571842	0.265786	0.7328	0.2422	0.5773
10712072	LOC103690271	NM_001000241	D4ABB6	D4ABB6_RAT	D4ABB6_RAT Olfactory receptor OS=Rattus norvegicus (Rat) GN=LOC103690271 PE=3 SV=1	LOC103690271	293605	Olfactory receptor	3.79822	0.040417	3.94042	0.0198337	4.20862	0.0208342	1.10358	1.10358	1.32905	1.32905	1.20431	1.20431	0.352733	0.585384	0.000149318	0.0306	0.0001	0.0013
10712074	Olr308	NM_001000955	D3ZQS4	D3ZQS4_RAT	D3ZQS4_RAT Olfactory receptor OS=Rattus norvegicus (Rat) GN=Olr308 PE=3 SV=1	Olr308	405304	Olfactory receptor	3.74573	0.0846357	3.83565	0.0276203	3.82358	0.0603218	1.06431	1.06431	1.05544	1.05544	0.991668	0.991668	0.125523	0.403352	0.562691	0.5795	0.6665	0.9869
10712076	Olr309	NM_001000242	M0R6S4	M0R6S4_RAT	M0R6S4_RAT Olfactory receptor OS=Rattus norvegicus (Rat) GN=Olr309 PE=3 SV=1	Olr309	293607	Olfactory receptor	4.13209	0.0497731	4.18658	0.0817005	4.12863	0.0284272	1.03849	1.03849	0.997606	0.997606	0.960627	0.960627	0.665539	0.43267	0.760637	0.8073	0.9991	0.7862
10712078	Olr310	NM_001000765	M0R795	M0R795_RAT	M0R795_RAT Olfactory receptor OS=Rattus norvegicus (Rat) GN=Olr310 PE=3 SV=1	Olr310	405039	Olfactory receptor	4.02738	0.0219104	4.01217	0.069071	4.09554	0.0155228	0.989518	0.989518	1.04839	1.04839	1.05949	1.05949	0.0247294	0.113812	0.416253	0.943	0.582	0.4138
10712080	Olr311	NM_001000555	D3ZII3	D3ZII3_RAT	D3ZII3_RAT Olfactory receptor OS=Rattus norvegicus (Rat) GN=Olr311 PE=3 SV=1	Olr311	365385	Olfactory receptor	3.50774	0.0593163	3.50659	0.00484967	3.52819	0.11445	0.999201	0.999201	1.01428	1.01428	1.01509	1.01509	0.377518	0.00857751	0.97688	1	0.9808	0.9808
10712082	Olr312	NM_001000764	M0R8I0	M0R8I0_RAT	M0R8I0_RAT Olfactory receptor OS=Rattus norvegicus (Rat) GN=Olr312 PE=3 SV=1	Olr312	405038	Olfactory receptor	4.41797	0.143775	4.4774	0.029113	4.69388	0.112871	1.04206	1.04206	1.21076	1.21076	1.16189	1.16189	0.445743	0.20668	0.240761	0.91	0.2411	0.3964
10712084	Olr313	NM_001001040	D3Z9J0	D3Z9J0_RAT	D3Z9J0_RAT Olfactory receptor OS=Rattus norvegicus (Rat) GN=Olr313 PE=3 SV=1	Olr313	405926	Olfactory receptor	3.97995	0.0861476	4.02916	0.183747	3.73808	0.073702	1.0347	1.0347	0.845647	0.845647	0.817287	0.817287	0.205108	0.437143	0.2857	0.9577	0.4135	0.2982
10712086	Olr315	NM_001000243	F1LUD2	F1LUD2_RAT	F1LUD2_RAT Olfactory receptor OS=Rattus norvegicus (Rat) GN=Olr315 PE=3 SV=2	Olr315	293609	Olfactory receptor	4.12087	0.0503717	4.26643	0.110595	4.27354	0.0463865	1.10615	1.10615	1.11162	1.11162	1.00494	1.00494	0.812694	0.452854	0.341036	0.4089	0.3948	0.9995
10712088	---	ENSRNOT00000053216	---	---	---	---	---	---	3.42275	0.0929302	3.5044	3.14018e-16	3.57209	0.052393	1.05823		1.10906		1.04804		0.532462	0	0.317294	0.6748	0.2898	0.7179
10712090	Cyp2e1	NM_031543	P05182	CP2E1_RAT	CP2E1_RAT Cytochrome P450 2E1 OS=Rattus norvegicus (Rat) GN=Cyp2e1 PE=1 SV=4	Cyp2e1	25086	Cytochrome P450 2E1	5.14693	0.114027	7.22674	0.447927	9.21321	0.195511	4.2275	4.2275	16.7522	16.7522	3.96267	3.96267	0.202529	0.230388	0.00018725	0.0054	0.0001	0.0068
10712101	---	ENSRNOT00000054879	---	---	---	---	---	---	4.45523	0.0441558	4.52314	0.0853412	4.6003	0.060627	1.0482		1.10578		1.05494		0.404102	0.716378	0.358583	0.7576	0.3303	0.6965
10712104	---	ENSRNOT00000017121	---	---	---	---	---	---	5.72787	0.0900273	5.61579	0.121472	5.52393	0.0652227	0.925255		0.868181		0.938316		0.624128	0.717445	0.383971	0.6968	0.3561	0.7922
10712110	---	ENSRNOT00000040274	---	---	---	---	---	---	3.20953	0.0667126	3.20021	0.0162967	3.21668	0.065025	0.993561		1.00497		1.01148		0.105071	0.254767	0.967583	0.9845	0.9961	0.9656
10712112	Scgb1c1	NM_001107561	G3V7P0	G3V7P0_RAT	G3V7P0_RAT Secretoglobin family 1C member 1 OS=Rattus norvegicus (Rat) GN=Scgb1c1 PE=4 SV=1	Scgb1c1	309100	Secretoglobin family 1C member 1	4.42342	0.0617506	4.31357	0.0992784	4.34311	0.029691	0.926687	0.926687	0.945857	0.945857	1.02069	1.02069	0.54355	0.366743	0.541696	0.5386	0.6901	0.9606
10712116	Odf3	NM_001108924	D3ZE94	D3ZE94_RAT	D3ZE94_RAT Outer dense fiber of sperm tails 3 (Predicted) OS=Rattus norvegicus (Rat) GN=Odf3 PE=4 SV=1	Odf3	365387	Outer dense fiber of sperm tails 3 (Predicted)	5.62393	0.0494218	5.45325	0.0649473	5.52909	0.0363633	0.888424	0.888424	0.936374	0.936374	1.05397	1.05397	0.784561	0.797564	0.152084	0.1345	0.4556	0.6008
10712123	Ric8a	BC160852	B1H241	B1H241_RAT	B1H241_RAT Resistance to inhibitors of cholinesterase 8 homolog A (C. elegans) OS=Rattus norvegicus (Rat) GN=Ric8a PE=1 SV=1	Ric8a	293614	Resistance to inhibitors of cholinesterase 8 homolog A (C. elegans)	7.03333	0.040579	7.42316	0.062075	8.08963	0.0237082	1.31024	1.31024	2.0796	2.0796	1.58719	1.58719	0.114905	0.472641	9.37298e-06	0.002	0	0.0001
10712134	Psmd13	NM_001108925	B0BN93	PSD13_RAT	PSD13_RAT 26S proteasome non-ATPase regulatory subunit 13 OS=Rattus norvegicus (Rat) GN=Psmd13 PE=1 SV=1	Psmd13	365388	26S proteasome non-ATPase regulatory subunit 13	8.62508	0.0179984	8.8971	0.0571832	9.73538	0.0595059	1.2075	1.2075	2.15892	2.15892	1.78793	1.78793	0.0449861	0.368907	9.06403e-06	0.0174	0	0	Ubiquitin/proteasome system
10712149	Nlrp6	DQ631800	Q63035	NLRP6_RAT	NLRP6_RAT NACHT, LRR and PYD domains-containing protein 6 OS=Rattus norvegicus (Rat) GN=Nlrp6 PE=1 SV=4	Nlrp6	171390	NACHT, LRR and PYD domains-containing protein 6	4.42505	0.182606	4.21055	0.141407	4.35195	0	0.861843	0.861843	0.950596	0.983463	1.10298	1.10312	0.160309	0	0.548523	0.5296	0.9206	0.7477
10712157	Athl1	ENSRNOT00000020004	D3ZY02	D3ZY02_RAT	D3ZY02_RAT Protein Athl1 OS=Rattus norvegicus (Rat) GN=Athl1 PE=1 SV=3	Athl1	---	Protein Athl1	6.66499	0.063611	6.66427	0.130256	6.64249	0.0804701	0.999498	0.999498	0.984522	0.984522	0.985017	0.985017	0.341603	0.649515	0.982554	0.9997	0.9835	0.9879
10712171	Ifitm1	NM_001106314	F1M3Q1	F1M3Q1_RAT	F1M3Q1_RAT Protein Ifitm1 OS=Rattus norvegicus (Rat) GN=Ifitm1 PE=4 SV=2	Ifitm1	293618	Protein Ifitm1	5.63153	0.115432	5.77211	0.0914178	5.92941	0.273461	1.10235	1.10235	1.22934	1.22934	1.1152	1.1152	0.647566	0.324712	0.540586	0.8497	0.5121	0.8167
10712174	B4galnt4	NM_001107562	D4A750	D4A750_RAT	D4A750_RAT Protein B4galnt4 OS=Rattus norvegicus (Rat) GN=B4galnt4 PE=4 SV=1	B4galnt4	309105	Protein B4galnt4	4.73456	0.0676404	4.5285	0.0722367	4.52604	0.0511993	0.866901	0.866901	0.86542	0.86542	0.998292	0.998292	0.571247	0.888896	0.0995564	0.138	0.1317	0.9993
10712196	Pkp3	NM_001106315	D3ZJ50	D3ZJ50_RAT	D3ZJ50_RAT Plakophilin 3 (Predicted), isoform CRA_a OS=Rattus norvegicus (Rat) GN=Pkp3 PE=1 SV=1	Pkp3	293619	Plakophilin 3 (Predicted), isoform CRA_a	5.04346	0.112615	4.95925	0.0233647	4.96784	0.0578356	0.943299	0.943299	0.948936	0.948936	1.00598	1.00598	0.0805662	0.19347	0.689732	0.7021	0.773	0.9912
10712211	Ptdss2	NM_001106316	B2GV22	PTSS2_RAT	PTSS2_RAT Phosphatidylserine synthase 2 OS=Rattus norvegicus (Rat) GN=Ptdss2 PE=1 SV=1	Ptdss2	293620	Phosphatidylserine synthase 2	7.91966	0.0140665	8.18004	0.164754	7.72021	0.0617044	1.19779	1.19779	0.870882	0.870882	0.727071	0.727071	0.249436	0.0426154	0.0500073	0.2454	0.4029	0.0427
10712224	Lrrc56	NM_001024902	Q4V8C9	LRC56_RAT	LRC56_RAT Leucine-rich repeat-containing protein 56 OS=Rattus norvegicus (Rat) GN=Lrrc56 PE=2 SV=1	Lrrc56	365389	Leucine-rich repeat-containing protein 56	5.54152	0.0635259	5.61471	0.0915179	5.40931	0.116588	1.05204	1.05204	0.912434	0.912434	0.8673	0.8673	0.433349	0.732018	0.349627	0.843	0.6027	0.3288
10712239	Rassf7	NM_001106317	B0BNA2	B0BNA2_RAT	B0BNA2_RAT Protein Rassf7 OS=Rattus norvegicus (Rat) GN=Rassf7 PE=1 SV=1	Rassf7	293623	Protein Rassf7	6.35992	0.0491167	6.287	0.024003	6.14966	0.113337	0.950711	0.950711	0.86438	0.86438	0.909194	0.909194	0.00621851	0.207245	0.197875	0.784	0.1845	0.4183
10712245	Phrf1	NM_139093	Q63625	PHRF1_RAT	PHRF1_RAT PHD and RING finger domain-containing protein 1 OS=Rattus norvegicus (Rat) GN=Phrf1 PE=1 SV=2	Phrf1	245925	PHD and RING finger domain-containing protein 1	7.31439	0.043119	7.61153	0.0609976	8.16959	0.0328571	1.22871	1.22871	1.80901	1.80901	1.47229	1.47229	0.16804	0.713077	3.90159e-05	0.01	0	0.0004
10712265	Drd4	NM_012944	F1LLX2	F1LLX2_RAT	F1LLX2_RAT D(4) dopamine receptor OS=Rattus norvegicus (Rat) GN=Drd4 PE=3 SV=1	Drd4	25432	D(4) dopamine receptor	5.35063	6.28037e-16	5.30736	0.0432707	5.33802	0.081458	0.970452	0.970452	0.991302	0.991302	1.02148	1.02148	0.034895	0	0.83749	0.8303	0.982	0.9134
10712270	Tmem80	NM_001017455	Q5XID3	Q5XID3_RAT	Q5XID3_RAT Protein Tmem80 OS=Rattus norvegicus (Rat) GN=Tmem80 PE=2 SV=1	Tmem80	309109	Protein Tmem80	7.12081	0.0310202	7.21536	0.0620618	6.65524	0.058918	1.06773	1.06773	0.724184	0.724184	0.678246	0.678246	0.171432	0.695484	0.000627652	0.4685	0.0019	0.0007
10712276	Eps8l2	NM_001108508	F7DLY1	F7DLY1_RAT	F7DLY1_RAT Eps8l2 protein OS=Rattus norvegicus (Rat) GN=Eps8l2 PE=1 SV=2	Eps8l2	361674	Eps8l2 protein	5.75883	0.0178759	5.93211	0.0747137	5.84254	0.0154315	1.12762	1.12762	1.05974	1.05974	0.939804	0.939804	0.0407865	0.123281	0.0896691	0.0772	0.4415	0.393
10712299	Taldo1	NM_031811	Q9EQS0	TALDO_RAT	TALDO_RAT Transaldolase OS=Rattus norvegicus (Rat) GN=Taldo1 PE=1 SV=2	Taldo1	83688	Transaldolase	8.29462	0.0420846	7.87466	0.0828197	7.86503	0.0708111	0.747446	0.747446	0.742475	0.742475	0.99335	0.99335	0.320353	0.74099	0.00587938	0.0099	0.0092	0.9973
10712309	Rplp2	NM_001030021	P02401	RLA2_RAT	RLA2_RAT 60S acidic ribosomal protein P2 OS=Rattus norvegicus (Rat) GN=Rplp2 PE=1 SV=2	Rplp2	140662	60S acidic ribosomal protein P2	11.6456	0.0778438	12.0121	0.0907225	12.1561	0.0500443	1.28923	1.28492	1.42449	1.42103	1.10492	1.10592	0.43074	0.757522	0.00703707	0.0295	0.0066	0.4119
10712315	---	ENSRNOT00000054100	---	---	---	---	---	---	6.78082	0.163991	7.13993	0.0491529	7.39488	0.0918015	1.28264		1.53056		1.1933		0.39257	0.345255	0.0234299	0.1387	0.0198	0.3197
10712317	Pnpla2	NM_001108509	P0C548	PLPL2_RAT	PLPL2_RAT Patatin-like phospholipase domain-containing protein 2 OS=Rattus norvegicus (Rat) GN=Pnpla2 PE=1 SV=1	Pnpla2	361676	Patatin-like phospholipase domain-containing protein 2	9.75003	0.0101761	11.4336	0.170114	11.6841	0.0377811	3.21227	3.21227	3.82129	3.82129	1.18959	1.18959	0.00447724	0.0106262	1.95112e-05	0.0001	0	0.2633
10712330	Cracr2b	NM_001127541	B0BNK9	EFC4A_RAT	EFC4A_RAT EF-hand calcium-binding domain-containing protein 4A OS=Rattus norvegicus (Rat) GN=Cracr2b PE=2 SV=1	Cracr2b	309112	EF-hand calcium-binding domain-containing protein 4A	6.46085	0.0178163	6.50117	0.0348099	6.49945	0.0856559	1.02834	1.02834	1.02712	1.02712	0.998809	0.998809	0.249855	0.146814	0.866733	0.8881	0.8881	1
10712340	Cd151	NM_022523	Q9QZA6	CD151_RAT	CD151_RAT CD151 antigen OS=Rattus norvegicus (Rat) GN=Cd151 PE=1 SV=2	Cd151	64315	CD151 antigen	8.74001	0.122895	8.43139	0.0882393	7.87771	0.034426	0.807411	0.807411	0.550075	0.550075	0.681283	0.681283	0.375055	0.345331	0.00141997	0.1143	0.0012	0.0111
10712349	Tspan4	NM_001013070	Q5BK80	Q5BK80_RAT	Q5BK80_RAT Tetraspanin OS=Rattus norvegicus (Rat) GN=Tspan4 PE=1 SV=1	Tspan4	293627	Tetraspanin	6.64701	0.0341326	7.61134	0.0738608	7.72132	0.0345768	1.95115	1.95115	2.10571	2.10571	1.07921	1.07921	0.00528983	0.495422	1.18898e-05	0	0	0.3584
10712359	Ap2a2	NM_031008	Q66HM2	Q66HM2_RAT	Q66HM2_RAT AP-2 complex subunit alpha-2 OS=Rattus norvegicus (Rat) GN=Ap2a2 PE=1 SV=1	Ap2a2	81637	AP-2 complex subunit alpha-2	9.84081	0.0213706	9.98024	0.0980028	9.43255	0.0865291	1.10147	1.10147	0.753531	0.753531	0.684116	0.684116	0.712831	0.203757	0.00569882	0.452	0.0218	0.0056
10712383	Muc5b	ENSRNOT00000028967	D3ZAU0	D3ZAU0_RAT	D3ZAU0_RAT Protein Muc5b OS=Rattus norvegicus (Rat) GN=Muc5b PE=4 SV=2	Muc5b	309114	Protein Muc5b	4.98994	0.02413	4.99817	0.0970266	4.86286	0.0275701	1.00572	1.00572	0.915684	0.915684	0.910475	0.910475	0.571083	0.120152	0.270149	0.9966	0.344	0.3135
10712427	Brsk2	ENSRNOT00000027134	M9MMM8	M9MMM8_RAT	M9MMM8_RAT Serine/threonine-protein kinase BRSK2 OS=Rattus norvegicus (Rat) GN=Brsk2 PE=1 SV=1	Brsk2	293631	Serine/threonine-protein kinase BRSK2	4.70904	0.015914	4.76839	0.0434357	4.68343	0.0228036	1.042	1.042	0.982404	0.982404	0.942809	0.942809	0.0060779	0.271195	0.21548	0.3999	0.8535	0.208
10712445	LOC685544	NM_001109474	D3ZQT2	D3ZQT2_RAT	D3ZQT2_RAT Protein LOC685544 OS=Rattus norvegicus (Rat) GN=LOC685544 PE=4 SV=2	LOC685544	685544	Protein LOC685544	8.38182	0.0654011	8.69027	0.162056	8.55455	0.0362789	1.23838	1.18655	1.12719	1.09241	0.910215	0.922365	0.0584737	0.200026	0.191114	0.171	0.5034	0.6537
10712457	LOC685544	NM_001109474	D3ZQT2	D3ZQT2_RAT	D3ZQT2_RAT Protein LOC685544 OS=Rattus norvegicus (Rat) GN=LOC685544 PE=4 SV=2	LOC685544	685544	Protein LOC685544	5.83477	0.0398839	5.96623	0.10108	5.99099	0.0741574	1.0954	1.18655	1.11436	1.09241	1.01731	0.922365	0.26105	0.52073	0.349449	0.4888	0.3585	0.958
10712460	---	ENSRNOT00000053466	---	---	---	---	---	---	2.80233	0.108826	2.80734	0.0977348	2.70633	0.00337683	1.00348		0.935622		0.932381		0.000107929	0.00976639	0.653407	0.9996	0.7089	0.693
10712462	Syt8	NM_053325	Q925B4	SYT8_RAT	SYT8_RAT Synaptotagmin-8 OS=Rattus norvegicus (Rat) GN=Syt8 PE=2 SV=1	Syt8	60566	Synaptotagmin-8	5.68521	0.0944455	5.66077	0.0289838	5.48432	0.0708633	0.983208	0.983208	0.870019	0.870019	0.884878	0.884878	0.684762	0.405977	0.163904	0.9778	0.1875	0.2416
10712471	Tnni2	NM_017185	P27768	TNNI2_RAT	TNNI2_RAT Troponin I, fast skeletal muscle OS=Rattus norvegicus (Rat) GN=Tnni2 PE=1 SV=2	Tnni2	29389	Troponin I, fast skeletal muscle	12.8206	0.0212568	12.6986	0.0534208	12.1018	0.0439587	0.918947	0.918947	0.607639	0.607639	0.661234	0.661234	0.0221263	0.490867	4.09287e-05	0.1775	0	0.0001
10712477	Lsp1	NM_001025420	Q4QQV6	Q4QQV6_RAT	Q4QQV6_RAT Lymphocyte specific 1, isoform CRA_a OS=Rattus norvegicus (Rat) GN=Lsp1 PE=1 SV=1	Lsp1	361680	Lymphocyte specific 1, isoform CRA_a	7.92237	0.101583	8.10975	0.0729643	7.1101	0.064689	1.1387	1.1387	0.569485	0.569485	0.500119	0.500119	0.115101	0.838498	0.000300176	0.3119	0.001	0.0003
10712490	Tnnt3	NM_031532	P09739	TNNT3_RAT	TNNT3_RAT Troponin T, fast skeletal muscle OS=Rattus norvegicus (Rat) GN=Tnnt3 PE=1 SV=2	Tnnt3	24838	Troponin T, fast skeletal muscle	13.5431	0.00623037	13.5307	0.0243034	13.4858	0.0324176	0.991478	0.991478	0.96111	0.96111	0.96937	0.96937	0.14334	0.214105	0.222205	0.8732	0.2171	0.3965
10712501	Mrpl23	NM_022529	Q63750	RM23_RAT	RM23_RAT 39S ribosomal protein L23, mitochondrial OS=Rattus norvegicus (Rat) GN=Mrpl23 PE=2 SV=1	Mrpl23	64360	39S ribosomal protein L23, mitochondrial	8.83862	0.0861117	8.70468	0.202598	8.56299	0.0957634	0.911336	0.911336	0.826089	0.826089	0.906459	0.906459	0.653637	0.478958	0.415169	0.7736	0.3857	0.755
10712506	---	ENSRNOT00000036132	---	---	---	---	---	---	4.61552	0.0245785	4.63174	0.0241399	4.46022	0.12344	1.0113		0.897945		0.887908		0.000685971	0.0552455	0.270211	0.9911	0.3551	0.3053
10712517	Cd81	NM_013087	Q6P9V1	Q6P9V1_RAT	Q6P9V1_RAT Tetraspanin OS=Rattus norvegicus (Rat) GN=Cd81 PE=1 SV=1	Cd81	25621	Tetraspanin	10.1412	0.0730853	9.76182	0.0884727	8.99532	0.112595	0.76877	0.76877	0.451917	0.451917	0.587844	0.587844	0.458802	0.8385	0.000361452	0.0634	0.0003	0.0028
10712528	Tssc4	NM_001013194	Q5XIB1	TSSC4_RAT	TSSC4_RAT Protein TSSC4 OS=Rattus norvegicus (Rat) GN=Tssc4 PE=2 SV=1	Tssc4	361682	Protein TSSC4	5.69503	0.128748	5.95405	0.0619175	6.054	0.0197106	1.19667	1.19667	1.2825	1.2825	1.07173	1.07173	0.0648774	0.139557	0.0558438	0.1539	0.0533	0.6953
10712530	Kcnq1	NM_032073	Q9Z0N7	KCNQ1_RAT	KCNQ1_RAT Potassium voltage-gated channel subfamily KQT member 1 OS=Rattus norvegicus (Rat) GN=Kcnq1 PE=2 SV=1	Kcnq1	84020	Potassium voltage-gated channel subfamily KQT member 1	5.80781	0.178359	6.03105	0.0426178	6.12962	0.0467941	1.16735	1.16735	1.24989	1.24989	1.07072	1.07072	0.0167551	0.113123	0.180523	0.3715	0.1712	0.8083
10712548	Slc22a18	NM_001004260	A0A0G2JSS3	A0A0G2JSS3_RAT	A0A0G2JSS3_RAT Solute carrier family 22 member 18 OS=Rattus norvegicus (Rat) GN=Slc22a18 PE=1 SV=1	Slc22a18	309131	Solute carrier family 22 member 18	6.6461	0.120026	6.951	0.152065	6.90411	0.168997	1.23533	1.23533	1.19582	1.19582	0.96802	0.96802	0.083138	0.907965	0.356447	0.3739	0.4778	0.9734
10712560	Dhcr7	NM_022389	Q9Z2Z8	DHCR7_RAT	DHCR7_RAT 7-dehydrocholesterol reductase OS=Rattus norvegicus (Rat) GN=Dhcr7 PE=2 SV=1	Dhcr7	64191	7-dehydrocholesterol reductase	5.71286	0.209248	5.52323	0.0484873	5.08353	0.0831663	0.876831	0.876831	0.646481	0.646481	0.737293	0.737293	0.291187	0.192776	0.0403167	0.6021	0.0374	0.1311
10712570	---	XM_001066709	---	---	---	---	---	---	3.70757	0.047763	3.90345	0.185632	3.7199	0.0227157	1.14542		1.00858		0.880534		0.0109595	0.046277	0.426614	0.472	0.9978	0.5044
10712578	Rpl21	NM_053330	P20280	RL21_RAT	RL21_RAT 60S ribosomal protein L21 OS=Rattus norvegicus (Rat) GN=Rpl21 PE=1 SV=3	Rpl21	79449	60S ribosomal protein L21	12.0493	0.0497948	12.1586	0.0532671	12.2425	0.0245484	1.07874	1.07497	1.14336	1.11831	1.0599	1.04029	0.623557	0.58498	0.0551239	0.2563	0.0472	0.425
10712580	Shank2	NM_201350	Q9QX74	SHAN2_RAT	SHAN2_RAT SH3 and multiple ankyrin repeat domains protein 2 OS=Rattus norvegicus (Rat) GN=Shank2 PE=1 SV=2	Shank2	171093	SH3 and multiple ankyrin repeat domains protein 2	5.16686	0.035004	5.10556	0.0262536	5.04746	0.057439	0.958403	0.958403	0.920574	0.920574	0.960529	0.960529	0.274375	0.619514	0.197321	0.5672	0.1755	0.5982
10712606	LOC100364769	ENSRNOT00000042579	Q6QI72	Q6QI72_RAT	Q6QI72_RAT LRRG00136 OS=Rattus norvegicus (Rat) GN=LOC100364769 PE=2 SV=1	LOC100364769	100364769	LRRG00136	5.71289	0.0716054	5.7295	0.0539113	5.47781	0.0846298	1.01157	1.01157	0.849633	0.849633	0.839912	0.839912	0.492603	0.861323	0.0815779	0.9906	0.1227	0.1038
10712618	Fgf3	NM_130817	Q8R5L9	Q8R5L9_RAT	Q8R5L9_RAT Fibroblast growth factor OS=Rattus norvegicus (Rat) GN=Fgf3 PE=2 SV=1	Fgf3	170633	Fibroblast growth factor	5.6156	0.116179	5.40993	0.0354484	5.33897	0.0857832	0.86714	0.86714	0.825519	0.825519	0.952003	0.952003	0.279444	0.385037	0.139858	0.2769	0.1385	0.8496
10712623	Fgf4	NM_053809	Q8R5L6	Q8R5L6_RAT	Q8R5L6_RAT Fibroblast growth factor OS=Rattus norvegicus (Rat) GN=Fgf4 PE=2 SV=1	Fgf4	116499	Fibroblast growth factor	6.9484	0.0853678	6.71827	0.0654773	6.53	0.0979469	0.852556	0.852556	0.748253	0.748253	0.877659	0.877659	0.727588	0.861027	0.0348415	0.2055	0.0294	0.3313		Muscle development
10712629	Fgf19	NM_130753	Q8VI81	Q8VI81_RAT	Q8VI81_RAT Fibroblast growth factor 15 OS=Rattus norvegicus (Rat) GN=Fgf19 PE=2 SV=1	Fgf19	170582	Fibroblast growth factor 15	4.34397	0.0798774	4.17351	0.0632763	4.10411	0.069653	0.888557	0.888557	0.846825	0.846825	0.953034	0.953034	0.694641	0.962271	0.128617	0.2929	0.1218	0.7732
10712633	Oraov1	NM_001107565	D4A8F6	D4A8F6_RAT	D4A8F6_RAT Oral cancer overexpressed 1 (Predicted), isoform CRA_a OS=Rattus norvegicus (Rat) GN=Oraov1 PE=4 SV=1	Oraov1	309136	Oral cancer overexpressed 1 (Predicted), isoform CRA_a	6.92884	0.111965	7.05536	0.00340111	7.18209	0.0339624	1.09166	1.09166	1.19189	1.19189	1.09182	1.09182	0.0444766	0.0052462	0.0952418	0.4451	0.0821	0.4119
10712641	Mrgprf	NM_153722	P23749	MRGRF_RAT	MRGRF_RAT Mas-related G-protein coupled receptor member F OS=Rattus norvegicus (Rat) GN=Mrgprf PE=2 SV=1	Mrgprf	266762	Mas-related G-protein coupled receptor member F	6.34769	0.0441863	6.11606	0.0270464	5.95208	0.114005	0.851674	0.851674	0.760167	0.760167	0.892557	0.892557	0.8628	0.2057	0.021746	0.1311	0.0184	0.3112
10712646	Mrgprd	NM_001001506	Q7TN41	MRGRD_RAT	MRGRD_RAT Mas-related G-protein coupled receptor member D OS=Rattus norvegicus (Rat) GN=Mrgprd PE=2 SV=1	Mrgprd	293648	Mas-related G-protein coupled receptor member D	5.54533	0.0219252	5.39387	0.0576747	5.69127	0.0997385	0.900339	0.900339	1.10646	1.10646	1.22893	1.22893	0.382789	0.198769	0.0536968	0.3128	0.3398	0.0454
10712648	Mrpl21	NM_001107567	D3ZMR9	D3ZMR9_RAT	D3ZMR9_RAT Mitochondrial ribosomal protein L21 (Predicted), isoform CRA_a OS=Rattus norvegicus (Rat) GN=Mrpl21 PE=1 SV=1	Mrpl21	309140	Mitochondrial ribosomal protein L21 (Predicted), isoform CRA_a	9.51321	0.0272385	9.43847	0.0249417	9.47992	0.0583167	0.949512	0.949512	0.977187	0.977187	1.02915	1.02915	0.356583	0.428273	0.439601	0.4117	0.8272	0.7307
10712657	Cpt1a	NM_031559	P32198	CPT1A_RAT	CPT1A_RAT Carnitine O-palmitoyltransferase 1, liver isoform OS=Rattus norvegicus (Rat) GN=Cpt1a PE=1 SV=2	Cpt1a	25757	Carnitine O-palmitoyltransferase 1, liver isoform	6.2338	0.1644	7.31543	0.175094	6.45562	0.0905518	2.11642	2.11642	1.1662	1.1662	0.551026	0.551026	0.39405	0.702788	0.004735	0.005	0.5603	0.0152			Fatty acid oxydation
10712679	Mtl5	NM_001012069	Q5XHX9	MTL5_RAT	MTL5_RAT Tesmin OS=Rattus norvegicus (Rat) GN=Mtl5 PE=1 SV=2	Mtl5	309142	Tesmin	4.80988	0.0582503	4.88311	0.0152163	4.86133	0.0800203	1.05207	1.05207	1.0363	1.0363	0.985014	0.985014	0.36624	0.160203	0.672086	0.6587	0.8175	0.9559
10712687	RGD1311946	BC098053	Q4V7A5	CK024_RAT	CK024_RAT Uncharacterized protein C11orf24 homolog OS=Rattus norvegicus (Rat) PE=2 SV=1	RGD1311946	309145	Uncharacterized protein C11orf24 homolog	6.7587	0.0168388	6.30067	0.118689	6.45097	0.0655408	0.727978	0.727978	0.80791	0.80791	1.1098	1.1098	0.540709	0.0956823	0.0170361	0.0153	0.0744	0.4308
10712694	Suv420h1	NM_001108512	P0C2N5	SV421_RAT	SV421_RAT Histone-lysine N-methyltransferase SUV420H1 OS=Rattus norvegicus (Rat) GN=Suv420h1 PE=3 SV=1	Suv420h1	361688	Histone-lysine N-methyltransferase SUV420H1	8.94722	0.0110446	9.23886	0.160967	9.59849	0.041552	1.22403	1.22403	1.57055	1.57055	1.2831	1.2831	0.0421116	0.0191567	0.00891806	0.158	0.0073	0.0872
10712706	Chka	NM_017127	Q01134	CHKA_RAT	CHKA_RAT Choline kinase alpha OS=Rattus norvegicus (Rat) GN=Chka PE=1 SV=2	Chka	29194	Choline kinase alpha	5.07514	0.138975	5.86517	0.103233	7.65016	0.138726	1.72911	1.72911	5.9588	5.9588	3.44617	3.44617	0.180493	0.914301	2.08537e-05	0.0113	0	0.0002
10712720	Unc93b1	NM_001108513	D3ZDJ4	D3ZDJ4_RAT	D3ZDJ4_RAT Protein Unc93b1 OS=Rattus norvegicus (Rat) GN=Unc93b1 PE=1 SV=1	Unc93b1	361689	Protein Unc93b1	6.1218	0.0922843	6.10332	0.028984	5.82757	0.0266781	0.987268	0.987268	0.815505	0.815505	0.826022	0.826022	0.728594	0.169253	0.0195342	0.9681	0.0261	0.0348
10712732	LOC688778	ENSRNOT00000024034	F1LT79	F1LT79_RAT	F1LT79_RAT Aldehyde dehydrogenase OS=Rattus norvegicus (Rat) GN=LOC688778 PE=3 SV=3	LOC688778	688778	Aldehyde dehydrogenase	4.91693	0.187797	4.87104	0.204785	5.20078	0.150602	0.968696	0.968696	1.21744	1.21744	1.25678	1.25678	0.850912	0.922411	0.437883	0.9869	0.5434	0.463
10712737	---	ENSRNOT00000024064	---	---	---	---	---	---	6.68468	0.0507782	6.7984	0.0795541	6.6697	0.0305106	1.08202		0.989672		0.914655		0.171941	0.543529	0.297314	0.3951	0.985	0.3261
10712743	Acy3	NM_001009603	Q5M876	ACY3_RAT	ACY3_RAT N-acyl-aromatic-L-amino acid amidohydrolase (carboxylate-forming) OS=Rattus norvegicus (Rat) GN=Acy3 PE=1 SV=1	Acy3	293653	N-acyl-aromatic-L-amino acid amidohydrolase (carboxylate-forming)	6.22863	0.04278	6.50964	0.0770209	6.35612	0.020189	1.21505	1.21505	1.09239	1.09239	0.899052	0.899052	0.751316	0.30207	0.023835	0.0198	0.2516	0.1783
10712750	Tbx10	ENSRNOT00000024129	D3ZAQ3	D3ZAQ3_RAT	D3ZAQ3_RAT Protein Tbx10 OS=Rattus norvegicus (Rat) GN=Tbx10 PE=4 SV=1	Tbx10	688822	Protein Tbx10	5.38425	0.0313687	5.4014	0.0409219	5.34866	0.0119525	1.01196	1.01196	0.975634	0.975634	0.964105	0.964105	0.11937	0.382977	0.531441	0.8869	0.7684	0.5066
10712758	Nudt8	ENSRNOT00000024237	D3ZEH6	D3ZEH6_RAT	D3ZEH6_RAT Protein Nudt8 OS=Rattus norvegicus (Rat) GN=Nudt8 PE=1 SV=1	Nudt8	361692	Protein Nudt8	8.30847	0.0535684	7.23288	0.105937	6.22041	0.161071	0.474476	0.474476	0.235196	0.235196	0.495696	0.495696	0.399827	0.44162	4.49701e-05	0.0014	0	0.002
10712763	Doc2g	NM_001011937	Q5XIA7	Q5XIA7_RAT	Q5XIA7_RAT Double C2-like domain-containing protein OS=Rattus norvegicus (Rat) GN=Doc2g PE=2 SV=1	Doc2g	293654	Double C2-like domain-containing protein	7.75655	0.0373929	6.89815	0.0317329	6.29314	0.0637318	0.551566	0.551566	0.362635	0.362635	0.657465	0.657465	0.167798	0.612707	1.52672e-06	0	0	0.0002
10712776	---	ENSRNOT00000024770	---	---	---	---	---	---	6.29523	0.0440118	6.17101	0.0245106	6.12767	0.086502	0.917502		0.890349		0.970406		0.234834	0.290281	0.17525	0.3414	0.1701	0.8428
10712786	Cdk2ap2	NM_001109498	D4A033	D4A033_RAT	D4A033_RAT Cyclin-dependent kinase 2-associated protein OS=Rattus norvegicus (Rat) GN=Cdk2ap2 PE=1 SV=1	Cdk2ap2	688405	Cyclin-dependent kinase 2-associated protein	6.80213	0.0246591	6.86441	0.0512678	6.88075	0.0283979	1.04411	1.04411	1.05601	1.05601	1.01139	1.01139	0.11593	0.603613	0.351881	0.5027	0.3563	0.9482
10712791	Pitpnm1	NM_001008369	Q5U2N3	PITM1_RAT	PITM1_RAT Membrane-associated phosphatidylinositol transfer protein 1 OS=Rattus norvegicus (Rat) GN=Pitpnm1 PE=1 SV=1	Pitpnm1	361694	Membrane-associated phosphatidylinositol transfer protein 1	6.45474	0.00292013	6.38213	0.0288001	6.12879	0.0287641	0.950921	0.950921	0.797773	0.797773	0.838948	0.838948	0.0455141	0.0761364	0.000169819	0.1567	0.0002	0.0007
10712816	Tmem134	NM_001078647	D3ZF56	D3ZF56_RAT	D3ZF56_RAT Protein Tmem134 OS=Rattus norvegicus (Rat) GN=Tmem134 PE=4 SV=1	Tmem134	361695	Protein Tmem134	9.76372	0.0422976	9.88488	0.187515	9.67684	0.024125	1.08761	1.08761	0.941559	0.941559	0.865715	0.865715	0.000322349	0.038801	0.464661	0.7433	0.8432	0.4371
10712824	Gpr152	ENSRNOT00000054852	F1M221	F1M221_RAT	F1M221_RAT Protein Gpr152 OS=Rattus norvegicus (Rat) GN=Gpr152 PE=4 SV=3	Gpr152	688884	Protein Gpr152	6.04168	0.0803466	6.05893	0.101096	5.82472	0.085165	1.01203	1.01203	0.860378	0.860378	0.850149	0.850149	0.262089	0.957678	0.19328	0.9861	0.271	0.2226
10712829	Coro1b	NM_019222	O89046	COR1B_RAT	COR1B_RAT Coronin-1B OS=Rattus norvegicus (Rat) GN=Coro1b PE=1 SV=1	Coro1b	29474	Coronin-1B	7.17101	0.0310222	7.25907	0.0414557	7.24019	0.0111803	1.06294	1.06294	1.04912	1.04912	0.987	0.987	0.375352	0.285094	0.186481	0.1867	0.3319	0.8886
10712841	Ptprcap	NM_001024289	Q5I0I6	Q5I0I6_RAT	Q5I0I6_RAT Protein Ptprcap OS=Rattus norvegicus (Rat) GN=Ptprcap PE=1 SV=1	Ptprcap	499300	Protein Ptprcap	6	0.0178424	5.98506	0.010195	5.91762	0.0296855	0.989696	0.989696	0.944497	0.944497	0.95433	0.95433	0.192321	0.651728	0.064814	0.8897	0.0707	0.1276
10712845	Ppp1ca	NM_031527	P62138	PP1A_RAT	PP1A_RAT Serine/threonine-protein phosphatase PP1-alpha catalytic subunit OS=Rattus norvegicus (Rat) GN=Ppp1ca PE=1 SV=1	Ppp1ca	24668	Serine/threonine-protein phosphatase PP1-alpha catalytic subunit	10.0423	0.0230126	9.95758	0.144002	9.66432	0.0391868	0.942999	0.942999	0.769538	0.769538	0.816054	0.816054	0.527002	0.0689473	0.0466225	0.7664	0.0471	0.1151
10712853	Clcf1	NM_207615	Q4KMB8	Q4KMB8_RAT	Q4KMB8_RAT Cardiotrophin-like cytokine factor 1 OS=Rattus norvegicus (Rat) GN=Clcf1 PE=2 SV=1	Clcf1	365395	Cardiotrophin-like cytokine factor 1	5.13875	0.0581757	5.16595	0.0760951	5.18858	0.0815222	1.01904	1.01904	1.03514	1.03514	1.01581	1.01581	0.0247743	0.899201	0.888533	0.9632	0.8783	0.9716
10712858	Pold4	NM_001013195	Q6P6U6	Q6P6U6_RAT	Q6P6U6_RAT Polymerase (DNA-directed), delta 4 OS=Rattus norvegicus (Rat) GN=Pold4 PE=2 SV=1	Pold4	361698	Polymerase (DNA-directed), delta 4	6.23945	0.0198971	6.5136	0.101069	6.71079	0.0784027	1.20928	1.20928	1.38639	1.38639	1.14646	1.14646	0.395691	0.215887	0.012522	0.089	0.0105	0.2409
10712863	---	ENSRNOT00000053387	---	---	---	---	---	---	4.23274	0.0185553	4.76332	0.225887	4.84342	0.0755497	1.44451		1.52698		1.05709		0.28457	0.0255456	0.0416796	0.0795	0.0488	0.9206
10712865	---	ENSRNOT00000054849	---	---	---	---	---	---	6.07831	0.0398206	5.92511	0.175348	5.95121	0.049248	0.899253		0.915669		1.01826		0.609495	0.112944	0.58714	0.6025	0.6888	0.9873
10712867	Pc	NM_012744	P52873	PYC_RAT	PYC_RAT Pyruvate carboxylase, mitochondrial OS=Rattus norvegicus (Rat) GN=Pc PE=1 SV=2	Pc	25104	Pyruvate carboxylase, mitochondrial	7.74365	0.0939222	8.13075	0.0582305	8.33501	0.112566	1.30776	1.30776	1.50666	1.50666	1.15209	1.15209	0.791553	0.711525	0.0101586	0.0535	0.0089	0.3271
10712889	Sptbn2	NM_019167	F1MA36	F1MA36_RAT	F1MA36_RAT Spectrin beta 3 OS=Rattus norvegicus (Rat) GN=Sptbn2 PE=1 SV=2	Sptbn2	29211	Spectrin beta 3	5.27532	0.003645	5.21344	0.118252	5.33234	0.053373	0.958012	0.958012	1.04031	1.04031	1.08591	1.08591	0.00525056	0.00713918	0.566851	0.8305	0.8611	0.5389
10712928	Rbm4b	NM_001007014	Q64LC9	RBM4B_RAT	RBM4B_RAT RNA-binding protein 4B OS=Rattus norvegicus (Rat) GN=Rbm4b PE=1 SV=2	Rbm4b	474154	RNA-binding protein 4B	7.60298	0.0448352	8.4241	0.111149	8.54826	0.135493	1.76678	1.76678	1.92557	1.92557	1.08987	1.08987	0.131855	0.409297	0.00129288	0.0034	0.0016	0.6808
10712933	Ccdc87	NM_001109527	B2GV49	B2GV49_RAT	B2GV49_RAT Coiled-coil domain containing 87 OS=Rattus norvegicus (Rat) GN=Ccdc87 PE=2 SV=1	Ccdc87	689151	Coiled-coil domain containing 87	3.74887	0.194652	3.66886	0.127006	3.47543	0.0983823	0.946054	0.946054	0.827346	0.827346	0.874522	0.874522	0.184972	0.661658	0.439627	0.9153	0.4261	0.6392
10712935	Ctsf	NM_001034110	Q499S6	Q499S6_RAT	Q499S6_RAT Cathepsin F OS=Rattus norvegicus (Rat) GN=Ctsf PE=1 SV=1	Ctsf	361704	Cathepsin F	7.91282	0.0536831	8.40688	0.0620762	8.69062	0.151117	1.4084	1.4084	1.71452	1.71452	1.21735	1.21735	0.75479	0.332671	0.00395625	0.0281	0.0034	0.1842
10712950	Zdhhc24	NM_001039100	Q2TGI5	ZDH24_RAT	ZDH24_RAT Probable palmitoyltransferase ZDHHC24 OS=Rattus norvegicus (Rat) GN=Zdhhc24 PE=2 SV=1	Zdhhc24	293665	Probable palmitoyltransferase ZDHHC24	5.95386	0.0543063	5.95021	0.10207	5.9604	0.0579277	0.997474	0.997474	1.00454	1.00454	1.00709	1.00709	0.414633	0.664606	0.995451	0.9978	0.9995	0.9952
10712955	Mrpl11	NM_001006973	Q5XIE3	RM11_RAT	RM11_RAT 39S ribosomal protein L11, mitochondrial OS=Rattus norvegicus (Rat) GN=Mrpl11 PE=2 SV=1	Mrpl11	293666	39S ribosomal protein L11, mitochondrial	8.40451	0.157027	8.06001	0.0854287	7.67001	0.302977	0.78758	0.78758	0.601025	0.601025	0.763129	0.763129	0.112464	0.300725	0.111123	0.4908	0.0964	0.4283
10712962	Slc29a2	NM_031738	O54699	S29A2_RAT	S29A2_RAT Equilibrative nucleoside transporter 2 OS=Rattus norvegicus (Rat) GN=Slc29a2 PE=2 SV=1	Slc29a2	65194	Equilibrative nucleoside transporter 2	7.46638	0.0102887	7.937	0.0617885	6.48475	0.0334803	1.3857	1.3857	0.506405	0.506405	0.365449	0.365449	0.0724615	0.146332	7.68114e-07	0.0005	0	0
10712975	B3gnt1	NM_001106324	D3ZHA1	D3ZHA1_RAT	D3ZHA1_RAT Protein B3gnt1 OS=Rattus norvegicus (Rat) GN=B3gnt1 PE=1 SV=1	B3gnt1	293667	Protein B3gnt1	6.96027	0.0814332	6.68593	0.0236217	6.38354	0.137355	0.826828	0.826828	0.670482	0.670482	0.810909	0.810909	0.496159	0.162308	0.013807	0.1748	0.0113	0.1351
10712978	Brms1	NM_001009605	Q5M7T3	BRMS1_RAT	BRMS1_RAT Breast cancer metastasis-suppressor 1 homolog OS=Rattus norvegicus (Rat) GN=Brms1 PE=2 SV=1	Brms1	293668	Breast cancer metastasis-suppressor 1 homolog	8.78784	0.0550714	9.3454	0.191178	9.7523	0.0484851	1.47178	1.47178	1.95134	1.95134	1.32584	1.32584	0.122449	0.138284	0.00347141	0.0357	0.0028	0.1117
10712986	Rin1	NM_139038	P97680	RIN1_RAT	RIN1_RAT Ras and Rab interactor 1 OS=Rattus norvegicus (Rat) GN=Rin1 PE=2 SV=2	Rin1	207119	Ras and Rab interactor 1	5.96758	0.0602001	5.89557	0.134621	5.64718	0.0430764	0.951308	0.951308	0.800847	0.800847	0.841837	0.841837	0.619331	0.321007	0.0964159	0.8484	0.0981	0.1984
10712997	Cd248	NM_001106325	D3ZN06	D3ZN06_RAT	D3ZN06_RAT CD248 antigen, endosialin (Predicted) OS=Rattus norvegicus (Rat) GN=Cd248 PE=4 SV=1	Cd248	293669	CD248 antigen, endosialin (Predicted)	7.00485	0.182014	6.28438	0.0777014	5.95826	0.0210591	0.606898	0.606898	0.484109	0.484109	0.797678	0.797678	0.211211	0.0707408	0.00169519	0.01	0.0015	0.1857
10712999	Yif1a	NM_172017	B0BMV4	B0BMV4_RAT	B0BMV4_RAT Protein Yif1a OS=Rattus norvegicus (Rat) GN=Yif1a PE=1 SV=1	Yif1a	171441	Protein Yif1a	8.43404	0.0243609	7.66975	0.104492	7.82365	0.069355	0.588744	0.588744	0.655022	0.655022	1.11258	1.11258	0.103978	0.255114	0.000776876	0.0009	0.0027	0.3985
10713009	---	ENSRNOT00000027562	---	---	---	---	---	---	7.4871	0.112662	7.31259	0.025902	6.94113	0.147181	0.886067		0.684932		0.773002		0.618937	0.147901	0.0281598	0.5135	0.0256	0.1071
10713011	---	ENSRNOT00000054843	---	---	---	---	---	---	4.41162	0.0788078	4.37576	0.0652107	4.30502	0.0542267	0.975449		0.928772		0.952148		0.370486	0.879476	0.557664	0.9229	0.5389	0.754
10713015	Gal3st3	NM_001024290	Q505J7	Q505J7_RAT	Q505J7_RAT Galactose-3-O-sulfotransferase 3 OS=Rattus norvegicus (Rat) GN=Gal3st3 PE=2 SV=1	Gal3st3	499302	Galactose-3-O-sulfotransferase 3	5.9134	0.054208	5.97006	0.00031	6.04074	0.0731563	1.04006	1.04006	1.09228	1.09228	1.05021	1.05021	0.000825627	0	0.301154	0.7612	0.2764	0.6088
10713021	---	ENSRNOT00000039107	---	---	---	---	---	---	3.60036	0	3.60808	0.0172381	3.58243	0.0612705	1.00536		0.987651		0.982382		0.524297	0	0.869741	0.991	0.9225	0.8677
10713033	Eif1ad	NM_001008305	Q5RKI6	EIF1A_RAT	EIF1A_RAT Probable RNA-binding protein EIF1AD OS=Rattus norvegicus (Rat) GN=Eif1ad PE=1 SV=1	Eif1ad	293673	Probable RNA-binding protein EIF1AD	6.75259	0.13038	6.89469	0.0940249	7.70476	0.0455986	1.1035	1.1035	1.93478	1.93478	1.75331	1.75331	0.110192	0.475347	0.000869962	0.5894	0.001	0.0024
10713040	---	ENSRNOT00000027833	---	---	---	---	---	---	6.23258	0.127683	6.24016	0.0455513	6.15233	0.0572335	1.00526		0.945892		0.940938		0.578936	0.362639	0.730559	0.9996	0.7776	0.7625
10713042	Bles03	NM_001024233	A0A0H2UHS1	A0A0H2UHS1_RAT	A0A0H2UHS1_RAT RCG47431 OS=Rattus norvegicus (Rat) GN=Bles03 PE=1 SV=1	Bles03	266609	RCG47431	7.587	0.0490658	7.70765	0.140594	7.75603	0.0590386	1.08722	1.08722	1.1243	1.1243	1.03411	1.03411	0.684522	0.371191	0.45113	0.6328	0.4421	0.9323
10713045	Fosl1	NM_012953	P10158	FOSL1_RAT	FOSL1_RAT Fos-related antigen 1 OS=Rattus norvegicus (Rat) GN=Fosl1 PE=2 SV=1	Fosl1	25445	Fos-related antigen 1	5.23083	0.0867751	5.14769	0.0401693	5.21701	0.0391784	0.944001	0.944001	0.990466	0.990466	1.04922	1.04922	0.139044	0.46918	0.621963	0.6335	0.9864	0.7229
10713050	Fibp	NM_172334	Q8CFG2	Q8CFG2_RAT	Q8CFG2_RAT Fibroblast growth factor acidic intracellular binding protein OS=Rattus norvegicus (Rat) GN=Fibp PE=2 SV=1	Fibp	282837	Fibroblast growth factor acidic intracellular binding protein	7.44512	0.0436347	7.60188	0.161996	7.29554	0.0833859	1.11478	1.11478	0.901511	0.901511	0.808689	0.808689	0.0692239	0.279363	0.215347	0.5787	0.6274	0.1925
10713061	Efemp2	NM_001005907	Q5XI84	Q5XI84_RAT	Q5XI84_RAT EGF-containing fibulin-like extracellular matrix protein 2 OS=Rattus norvegicus (Rat) GN=Efemp2 PE=1 SV=1	Efemp2	293677	EGF-containing fibulin-like extracellular matrix protein 2	7.02632	0.0590463	6.93146	0.111637	7.0154	0.0803251	0.93636	0.93636	0.992454	0.992454	1.05991	1.05991	0.619266	0.722011	0.703858	0.7252	0.9964	0.7703
10713074	Cfl1	NM_017147	P45592	COF1_RAT	COF1_RAT Cofilin-1 OS=Rattus norvegicus (Rat) GN=Cfl1 PE=1 SV=3	Cfl1	29271	Cofilin-1	9.10427	0.0712385	8.29303	0.0376319	7.97653	0.0923198	0.56989	0.56989	0.457631	0.457631	0.803017	0.803017	0.150536	0.54946	7.3189e-05	0.0004	0.0001	0.0434
10713077	---	ENSRNOT00000028045	---	---	---	---	---	---	4.49926	0.0196663	4.4722	0.022958	4.51213	0.016971	0.98142		1.00896		1.02806		0.160953	0.913079	0.419037	0.643	0.8897	0.4009
10713079	---	ENSRNOT00000054841	---	---	---	---	---	---	4.98298	0.027412	4.95557	0	4.80593	0.111901	0.981179		0.88451		0.901477		0.00483787	0	0.205542	0.958	0.2212	0.3118
10713081	Ap5b1	ENSRNOT00000036185	D3ZVB0	AP5B1_RAT	AP5B1_RAT AP-5 complex subunit beta-1 OS=Rattus norvegicus (Rat) GN=Ap5b1 PE=3 SV=1	Ap5b1	361709	AP-5 complex subunit beta-1	6.52006	0.0922656	6.57732	0.037229	6.52552	0.0127685	1.04049	1.04049	1.00379	1.00379	0.964727	0.964727	0.0707917	0.0982568	0.751946	0.7682	0.9962	0.8128
10713084	Rnaseh2c	ENSRNOT00000028097	D4A434	D4A434_RAT	D4A434_RAT Protein Rnaseh2c OS=Rattus norvegicus (Rat) GN=Rnaseh2c PE=1 SV=1	Rnaseh2c	100361939	Protein Rnaseh2c	6.94808	0.082298	7.04639	0.0812542	6.49067	0.0391871	1.07052	1.07052	0.728293	0.728293	0.680316	0.680316	0.229817	0.628897	0.00320056	0.6076	0.0094	0.0036
10713089	Rela	NM_199267	Q7TQN4	Q7TQN4_RAT	Q7TQN4_RAT Protein Rela OS=Rattus norvegicus (Rat) GN=Rela PE=1 SV=1	Rela	309165	Protein Rela	8.36144	0.0986395	8.96166	0.0789423	9.31553	0.0295705	1.51595	1.51595	1.93735	1.93735	1.27798	1.27798	0.296442	0.324181	0.000287221	0.003	0.0002	0.0335	TNFa/NFkb signaling
10713102	Map3k11	NM_001013150	Q66HA1	M3K11_RAT	M3K11_RAT Mitogen-activated protein kinase kinase kinase 11 OS=Rattus norvegicus (Rat) GN=Map3k11 PE=1 SV=1	Map3k11	309168	Mitogen-activated protein kinase kinase kinase 11	7.17326	0.0785088	7.22895	0.169281	7.16041	0.0125002	1.03936	1.03936	0.991134	0.991134	0.953603	0.953603	0.0497932	0.0310234	0.905607	0.9445	0.9936	0.9041
10713116	Kcnk7	ENSRNOT00000028197	D4A806	D4A806_RAT	D4A806_RAT Protein Kcnk7 OS=Rattus norvegicus (Rat) GN=Kcnk7 PE=3 SV=3	Kcnk7	499303	Protein Kcnk7	5.12457	0.0151737	5.12296	0.0135587	5.08824	0.0150624	0.998881	0.998881	0.975128	0.975128	0.97622	0.97622	0.0468548	0.979482	0.231362	1	0.2862	0.2862
10713123	Ltbp3	ENSRNOT00000028262	F1LRT0	F1LRT0_RAT	F1LRT0_RAT Protein Ltbp3 OS=Rattus norvegicus (Rat) GN=Ltbp3 PE=4 SV=1	Ltbp3	83838	Protein Ltbp3	7.71485	0.0332164	7.65093	0.0670018	6.99044	0.0347809	0.956658	0.956658	0.605243	0.605243	0.632664	0.632664	0.0102768	0.622749	5.96195e-05	0.6016	0.0001	0.0001
10713152	Slc25a45	ENSRNOT00000051979	D3ZL04	D3ZL04_RAT	D3ZL04_RAT Protein Slc25a45 OS=Rattus norvegicus (Rat) GN=Slc25a45 PE=1 SV=2	Slc25a45	689625	Protein Slc25a45	5.59522	0.0418241	5.78302	0.087635	6.66292	0.0420235	1.13903	1.13903	2.09609	2.09609	1.84024	1.84024	0.0163737	0.502691	3.81047e-05	0.1594	0	0.0001
10713160	Syvn1	NM_001100739	B2RYC4	B2RYC4_RAT	B2RYC4_RAT Syvn1 protein OS=Rattus norvegicus (Rat) GN=Syvn1 PE=2 SV=1	Syvn1	361712	Syvn1 protein	7.5103	0.0474286	7.6779	0.00615379	7.8561	0.0310654	1.12318	1.12318	1.27085	1.27085	1.13148	1.13148	0.459559	0.104775	0.000845538	0.0221	0.0007	0.0203	Ubiquitin/proteasome system
10713176	LOC100360647	NM_001012739	Q5BJN7	Q5BJN7_RAT	Q5BJN7_RAT 40S ribosomal protein S30 OS=Rattus norvegicus (Rat) GN=LOC100360647 PE=1 SV=1	LOC100360647	687780	40S ribosomal protein S30	9.56444	0.0320057	9.81675	0.109606	9.72608	0.0114297	1.19111	1.19111	1.11856	1.02842	0.93909	0.94172	0.147162	0.0470134	0.0833669	0.0744	0.2679	0.5962
10713184	Znhit2	NM_001107574	B5DEI7	B5DEI7_RAT	B5DEI7_RAT Protein Znhit2 OS=Rattus norvegicus (Rat) GN=Znhit2 PE=2 SV=1	Znhit2	309177	Protein Znhit2	6.54033	0.167767	6.5908	0.116123	6.91197	0.0695251	1.0356	1.0356	1.29383	1.29383	1.24935	1.24935	0.389597	0.570739	0.154146	0.9577	0.1703	0.2425
10713186	Naaladl1	NM_031759	O54697	NALDL_RAT	NALDL_RAT N-acetylated-alpha-linked acidic dipeptidase-like protein OS=Rattus norvegicus (Rat) GN=Naaladl1 PE=1 SV=1	Naaladl1	83568	N-acetylated-alpha-linked acidic dipeptidase-like protein	4.36754	0.0680597	4.35455	0.0550703	4.27756	0.012153	0.991037	0.991037	0.939534	0.939534	0.948031	0.948031	0.00114525	0.165911	0.462155	0.9805	0.479	0.5798
10713201	Batf2	ENSRNOT00000028527	D3ZT85	D3ZT85_RAT	D3ZT85_RAT Protein Batf2 OS=Rattus norvegicus (Rat) GN=Batf2 PE=4 SV=2	Batf2	309178	Protein Batf2	5.99577	0.0557423	5.93817	0.129425	5.79869	0.0537817	0.960863	0.960863	0.872314	0.872314	0.907845	0.907845	0.441301	0.377641	0.343099	0.8932	0.3315	0.5471
10713205	---	BC078985	Q6AYM7	CK085_RAT	CK085_RAT Uncharacterized protein C11orf85 homolog OS=Rattus norvegicus (Rat) PE=2 SV=1	---	499306	Uncharacterized protein C11orf85 homolog	4.33799	0.04986	4.26509	0.0385567	4.2853	0.00283367	0.950724	0.950724	0.964135	0.964135	1.01411	1.01411	0.0106446	0.0364527	0.397314	0.3888	0.5844	0.9215
10713217	Gpha2	NM_133619	A0A0F7RPV4	A0A0F7RPV4_RAT	A0A0F7RPV4_RAT Glycoprotein hormone alpha 2, isoform CRA_a OS=Rattus norvegicus (Rat) GN=Gpha2 PE=4 SV=1	Gpha2	171158	Glycoprotein hormone alpha 2, isoform CRA_a	5.18335	0.0232985	5.12269	0.122388	5.27676	0.0513419	0.958825	0.958825	1.06689	1.06689	1.1127	1.1127	0.0396959	0.157235	0.440432	0.8524	0.7062	0.4149
10713222	Atg2a	NM_001109545	D3ZT64	D3ZT64_RAT	D3ZT64_RAT Protein Atg2a OS=Rattus norvegicus (Rat) GN=Atg2a PE=1 SV=1	Atg2a	689688	Protein Atg2a	8.25434	0.0513487	8.50674	0.0986965	8.50979	0.0528092	1.19119	1.19119	1.19371	1.19371	1.00212	1.00212	0.891021	0.604247	0.0693187	0.1012	0.093	0.9975
10713278	Cdc42bpg	ENSRNOT00000038016	D3Z837	D3Z837_RAT	D3Z837_RAT Non-specific serine/threonine protein kinase OS=Rattus norvegicus (Rat) GN=Cdc42bpg PE=1 SV=2	Cdc42bpg	293693	Non-specific serine/threonine protein kinase	6.09387	0.15967	6.42528	0.197761	6.26432	0.000762	1.25825	1.25825	1.12541	1.12541	0.894426	0.894426	0.209213	0.00378496	0.346714	0.3184	0.7005	0.7364
10713316	Men1	NM_019208	Q9WVR8	MEN1_RAT	MEN1_RAT Menin OS=Rattus norvegicus (Rat) GN=Men1 PE=1 SV=1	Men1	29417	Menin	6.69001	0.0236694	6.91809	0.067069	6.97308	0.0445506	1.17127	1.17127	1.21678	1.21678	1.03885	1.03885	0.256209	0.442874	0.0160855	0.0436	0.017	0.7129
10713328	Map4k2	NM_001106329	D3ZXB1	D3ZXB1_RAT	D3ZXB1_RAT Mitogen-activated protein kinase kinase kinase kinase OS=Rattus norvegicus (Rat) GN=Map4k2 PE=1 SV=1	Map4k2	293694	Mitogen-activated protein kinase kinase kinase kinase	6.5698	0.114214	6.90548	0.0595983	6.87559	0.221498	1.26197	1.26197	1.2361	1.2361	0.979498	0.979498	0.726395	0.274062	0.283569	0.3163	0.3737	0.9889
10713362	Sf1	NM_001110793	F1LM37	F1LM37_RAT	F1LM37_RAT Protein Sf1 OS=Rattus norvegicus (Rat) GN=Sf1 PE=1 SV=2	Sf1	117855	Protein Sf1	8.94413	0.0253594	9.39971	0.108794	9.81425	0.0620907	1.37134	1.37134	1.82781	1.82781	1.33287	1.33287	0.240047	0.250535	0.000489314	0.0111	0.0004	0.0168
10713382	Pygm	NM_012638	G3V8V3	G3V8V3_RAT	G3V8V3_RAT Alpha-1,4 glucan phosphorylase OS=Rattus norvegicus (Rat) GN=Pygm PE=1 SV=1	Pygm	24701	Alpha-1,4 glucan phosphorylase	13.4991	0.0043407	13.5601	0.0211855	13.396	0.0190073	1.04318	1.04318	0.931004	0.931004	0.892464	0.892464	0.781603	0.339331	0.000897345	0.0679	0.0088	0.0008
10713402	Rasgrp2	NM_001082977	P0C643	GRP2_RAT	GRP2_RAT RAS guanyl-releasing protein 2 OS=Rattus norvegicus (Rat) GN=Rasgrp2 PE=1 SV=1	Rasgrp2	361714	RAS guanyl-releasing protein 2	6.6399	0.169299	6.12324	0.1286	6.14264	0.123335	0.698988	0.698988	0.708453	0.708453	1.01354	1.01354	0.212758	0.901941	0.0715452	0.0948	0.1053	0.9962
10713419	Nrxn2	NM_053846	Q63374	NRX2A_RAT	NRX2A_RAT Neurexin-2 OS=Rattus norvegicus (Rat) GN=Nrxn2 PE=1 SV=3	Nrxn2	116595	Neurexin-2	5.82505	0.10703	5.83861	0.0376796	5.7802	0.0351971	1.00945	1.00945	0.969392	0.969392	0.960318	0.960318	0.989755	0.255366	0.842457	0.9842	0.9136	0.8365
10713448	---	XM_001072560	---	---	---	---	---	---	5.38525	0.0628176	5.19398	0.0809016	5.35474	0.0223668	0.875833		0.979072		1.11788		0.268658	0.356524	0.12609	0.1371	0.9347	0.2142
10713450	---	ENSRNOT00000028681	---	---	---	---	---	---	7.8275	0.0699913	7.36622	0.0866233	6.70935	0.217697	0.72634		0.460683		0.634253		0.586617	0.285039	0.00385284	0.1271	0.0032	0.0366
[truncated: 25,147 more rows]
